# Supplementary material
Source: publisher site journal article supplement (https://www.spandidos-publications.com/4976/downloadSupplementary)
Supplement: Supplementary file 1 [file downloadSupplementary]

## Sheet: African-American
Table SIV. Details of genetic variants.
Chromosome	Position	End position	Cytoband	Reference allele	Sample allele	Variation type	Gene region	Gene symbol	Transcript ID	Transcript variant	Protein variant	Translation impact	Classification	SIFT function prediction	SIFT score	PolyPhen-2 function prediction	CADD score	dbSNP ID	gnomAD frequency	CLINVAR ID	CentoMD	OMIM Gene	OMIM Phenotype	PGMD	COSMIC ID	Cosmic Frequency
1	866422	866422	p36.33	C	T	SNV	Exonic	SAMD11	NM_001385640.1; NM_152486.4; NM_001385641.1	c.795C>T; c.258C>T	p.V265V; p.V86V	synonymous	Likely Benign				10.98	139210662	0.176	RCV001522030.1
1	877815	877815	p36.33	G	A	SNV	Exonic	SAMD11	NM_001385640.1; NM_152486.4; NM_001385641.1	c.1011G>A; c.1500G>A; c.1503G>A	p.Q500Q; p.Q501Q; p.Q337Q	synonymous	Uncertain Significance				< 10	745576729	0.009	RCV001042469.2
1	879381	879381	p36.33	C	T	SNV	Exonic	SAMD11	NM_001385640.1; NM_152486.4; NM_001385641.1	c.2386C>T; c.1894C>T; c.2383C>T	p.L795F; p.L796F; p.L632F	missense	Likely Benign			Benign	18.45	116362966	0.166	RCV001510705.1
1	879413	879413	p36.33	G	A	SNV	Exonic	SAMD11	NM_001385640.1; NM_152486.4; NM_001385641.1	c.2415G>A; c.2418G>A; c.1926G>A	p.T806T; p.T642T; p.T805T	synonymous	Likely Benign				< 10	116279254	0.242	RCV001519429.1
1	881554	881554	p36.33	C	T	SNV	Exonic	NOC2L	ENST00000327044.7; NM_015658.4	c.1916G>A	p.R639Q	missense	Uncertain Significance			Probably Damaging	29	147322750	0.019
1	887471	887471	p36.33	G	A	SNV	Exonic	NOC2L	ENST00000327044.7; NM_015658.4	c.1240C>T	p.L414L	synonymous	Likely Benign				< 10	114187206	0.206
1	889403	889403	p36.33	T	A	SNV	Exonic	NOC2L	ENST00000327044.7; NM_015658.4	c.758A>T	p.Y253F	missense	Uncertain Significance			Possibly Damaging	23.3	62639963	0.179
1	892551	892551	p36.33	C	T	SNV	Exonic	NOC2L	ENST00000327044.7; NM_015658.4	c.282G>A	p.L94L	synonymous	Likely Benign				< 10	62639969	0.146
1	896125	896125	p36.33	G	A	SNV	Promoter; Exonic	NOC2L; KLHL17	ENST00000338591.8; ENST00000327044.7; NM_198317.3; NM_015658.4	c.52G>A; c.-1505C>T	p.G18S	missense	Uncertain Significance	Tolerated	0.14	Benign	19.62
1	897785	897785	p36.33	G	C	SNV	Exonic	KLHL17	ENST00000338591.8; NM_198317.3	c.762G>C	p.E254D	missense	Uncertain Significance	Tolerated	0.34	Benign	< 10	747894283
1	898119	898119	p36.33	C	T	SNV	Exonic	KLHL17	ENST00000338591.8; NM_198317.3	c.864C>T	p.R288R	synonymous	Likely Benign				< 10	79110607	0.309	RCV000970029.1
1	899752	899752	p36.33	G	A	SNV	Exonic	KLHL17	ENST00000338591.8; NM_198317.3	c.1542G>A	p.A514A	synonymous	Uncertain Significance				< 10	375478387	0.043
1	900384	900384	p36.33	C	T	SNV	Promoter; Exonic	PLEKHN1; KLHL17	NM_001367552.1; NM_032129.3; NM_198317.3; NM_001160184.2; ENST00000379407.7; ENST00000379410.8; ENST00000338591.8; ENST00000379409.6	c.-1528C>T; c.1742C>T	p.A581V	missense	Uncertain Significance	Tolerated	0.69	Probably Damaging	22.9	1047629279
1	906583	906583	p36.33	G	A	SNV	Exonic	PLEKHN1	NM_001367552.1; NM_032129.3; NM_001160184.2; ENST00000379407.7; ENST00000379410.8; ENST00000379409.6	c.703G>A; c.859G>A; c.739G>A	p.A287T; p.A247T; p.A235T	missense	Uncertain Significance	Tolerated	0.53	Benign	15.12	200886536	0.015
1	908929	908929	p36.33	C	T	SNV	Exonic	PLEKHN1	NM_001367552.1; NM_032129.3; NM_001160184.2; ENST00000379407.7; ENST00000379410.8; ENST00000379409.6	c.1238C>T; c.1499C>T; c.1379C>T; c.1343C>T	p.S460L; p.S413L; p.S448L; p.S500L	missense	Uncertain Significance	Activating	1	Benign	< 10	142080242	0.41
1	909015	909015	p36.33	G	C	SNV	Exonic	PLEKHN1	NM_001367552.1; NM_032129.3; NM_001160184.2; ENST00000379407.7; ENST00000379410.8; ENST00000379409.6	c.1429G>C; c.1465G>C; c.1324G>C; c.1585G>C	p.E477Q; p.E529Q; p.E442Q; p.E489Q	missense	Uncertain Significance	Tolerated	0.09	Benign	< 10	143407629	0.022
1	909859	909859	p36.33	C	T	SNV	Exonic	PLEKHN1	NM_001367552.1; NM_032129.3; NM_001160184.2; ENST00000379407.7; ENST00000379410.8; ENST00000379409.6	c.1776C>T; c.1740C>T; c.1896C>T; c.1635C>T	p.Y580Y; p.Y592Y; p.Y545Y; p.Y632Y	synonymous	Likely Benign				< 10	144540961	0.015
1	915543	915543	p36.33	T	C	SNV	Exonic	PERM1	NM_001369898.1; NM_001291366.2; ENST00000341290.6; NM_001291367.2; NM_001369897.1	c.525A>G; c.867A>G	p.P289P; p.P175P	synonymous	Likely Benign				< 10	114358412	0.375
1	916534	916534	p36.33	C	T	SNV	Exonic; Intronic; 5'UTR	PERM1	NM_001291366.2; NM_001369898.1; ENST00000341290.6; NM_001291367.2; NM_001369897.1	c.-125G>A; c.-18-107G>A; c.13G>A	p.G5S	missense	Likely Benign				< 10	61744472	0.306
1	934774	934774	p36.33	G	T	SNV	Exonic	HES4	NM_001142467.2; NM_021170.4; ENST00000428771.6; ENST00000304952.11	c.331C>A; c.409C>A	p.R137S; p.R111S	missense	Uncertain Significance	Damaging	0.03	Possibly Damaging	23.8	375384131	0.046
1	935264	935264	p36.33	G	C	SNV	Exonic	HES4	NM_001142467.2; NM_021170.4; ENST00000428771.6; ENST00000304952.11	c.90C>G	p.S30R	missense	Uncertain Significance	Tolerated	0.8	Benign	16.48	369642483	0.048
1	955563	955563	p36.33	G	C	SNV	Exonic	AGRN	ENST00000379370.7; NM_001305275.2; NM_198576.4	c.11G>C	p.R4P	missense	Likely Benign			Benign	10.81	539283387	0.649	RCV000535257.5; RCV000424799.1
1	970687	970687	p36.33	C	T	SNV	Exonic	AGRN	ENST00000379370.7; NM_001305275.2; NM_001364727.2; NM_198576.4	c.494C>T; c.179C>T	p.P60L; p.P165L	missense	Uncertain Significance			Possibly Damaging	22.1	140954236	0.066	RCV000555748.3
1	976112	976112	p36.33	G	A	SNV	Exonic	AGRN	ENST00000379370.7; NM_001305275.2; NM_001364727.2; NM_198576.4	c.579G>A; c.264G>A	p.A193A; p.A88A	synonymous	Likely Benign				< 10	201301445	0.111	RCV000536149.5
1	976563	976563	p36.33	C	T	SNV	Exonic	AGRN	ENST00000379370.7; NM_001305275.2; NM_001364727.2; NM_198576.4	c.423C>T; c.738C>T	p.D246D; p.D141D	synonymous	Likely Benign				< 10	536085218	0.273	RCV001562019.1; RCV000551940.5; RCV000246662.1
1	978847	978847	p36.33	G	A	SNV	Intronic	AGRN	ENST00000379370.7; NM_001305275.2; NM_001364727.2; NM_198576.4	c.1603+10G>A; c.1288+10G>A			Likely Benign				17.98	60074964	0.187	RCV000651401.4; RCV001567196.1
1	980623	980623	p36.33	C	T	SNV	Exonic	AGRN	ENST00000379370.7; NM_001305275.2; NM_001364727.2; NM_198576.4	c.2337C>T; c.2022C>T	p.T674T; p.T779T	synonymous	Likely Benign				< 10	141886688	0.007	RCV000873147.3
1	982848	982848	p36.33	G	A	SNV	Intronic	AGRN	ENST00000379370.7; NM_001305275.2; NM_001364727.2; NM_198576.4	c.3201+14G>A; c.3516+14G>A			Uncertain Significance				< 10	201858483	0.066
1	982969	982969	p36.33	G	A	SNV	Exonic	AGRN	ENST00000379370.7; NM_001305275.2; NM_001364727.2; NM_198576.4	c.3533G>A; c.3218G>A	p.R1178Q; p.R1073Q	missense	Uncertain Significance			Possibly Damaging	28.1	148430436	0.085	RCV000651399.4; RCV001584502.1
1	986731	986731	p36.33	C	T	SNV	Exonic	AGRN	ENST00000379370.7; NM_001305275.2; NM_001364727.2; NM_198576.4	c.5049C>T; c.5352C>T; c.5364C>T	p.F1784F; p.F1788F; p.F1683F	synonymous	Likely Benign				< 10	112073270	0.163	RCV000528442.5; RCV000252836.1
1	987012	987012	p36.33	G	A	SNV	Exonic	AGRN	ENST00000379370.7; NM_001305275.2; NM_001364727.2; NM_198576.4	c.5550G>A; c.5562G>A; c.5247G>A	p.P1749P; p.P1850P; p.P1854P	synonymous	Likely Benign				< 10	74045090	0.052	RCV000541245.5
1	987394	987394	p36.33	C	T	SNV	Intronic; Exonic	AGRN	ENST00000379370.7; NM_001305275.2; NM_001364727.2; NM_198576.4	c.5651+199C>T; c.5685C>T; c.5348+199C>T	p.P1895P	synonymous	Uncertain Significance				17.09	145352656	0.297
1	1007274	1007274	p36.33	G	A	SNV	Exonic	RNF223	ENST00000453464.3; NM_001205252.2	c.673C>T	p.R225C	missense	Uncertain Significance	Damaging	0		24.8	780569966	0.083
1	1115510	1115510	p36.33	C	T	SNV	Exonic	TTLL10	NM_001130045.2; ENST00000379289.6; NM_001371649.1; NM_153254.3; ENST00000379288.3; ENST00000379290.6	c.77C>T; c.296C>T	p.P26L; p.P99L	missense	Likely Benign			Benign	< 10	114359609	0.251
1	1116182	1116182	p36.33	C	T	SNV	Exonic	TTLL10	NM_001130045.2; ENST00000379289.6; NM_001371649.1; NM_153254.3; ENST00000379288.3; ENST00000379290.6	c.697C>T; c.478C>T	p.R233W; p.R160W	missense	Uncertain Significance	Damaging	0	Probably Damaging	22.9	58991788	0.153
1	1119399	1119399	p36.33	C	T	SNV	Exonic	TTLL10	NM_001130045.2; ENST00000379289.6; NM_001371649.1; NM_153254.3; ENST00000379288.3; ENST00000379290.6	c.969C>T; c.1188C>T	p.H323H; p.H396H	synonymous	Likely Benign				< 10	112690643	0.265
1	1140828	1140828	p36.33	C	G	SNV	Exonic	TNFRSF18	ENST00000379265.5; NM_148901.2; ENST00000379268.7; ENST00000486728.5; ENST00000328596.10; NM_004195.3; NM_148902.2	c.232G>C; c.16G>C	p.E6Q; p.E78Q	missense	Uncertain Significance	Tolerated	0.24	Probably Damaging	22.4	141311817	0.034
1	1141765	1141765	p36.33	C	T	SNV	Promoter; Exonic	TNFRSF18	ENST00000379265.5; NM_148901.2; ENST00000379268.7; ENST00000486728.5; ENST00000328596.10; NM_004195.3; NM_148902.2	c.-922G>A; c.187G>A	p.G63S	missense	Uncertain Significance	Tolerated	0.16	Benign	22.4	72894038	0.075
1	1164018	1164018	p36.33	C	G	SNV	Exonic	SDF4	ENST00000660930.1; ENST00000263741.12; NM_016176.6; ENST00000360001.12; NM_016547.3	c.156G>C; c.135G>C	p.E45D; p.E52D	missense	Uncertain Significance				< 10	116266251	0.012
1	1177981	1177981	p36.33	C	T	SNV	Exonic	C1QTNF12	ENST00000330388.2; NM_001014980.3	c.856G>A	p.V286I	missense	Likely Benign	Damaging	0.04	Benign	< 10	59852185	0.219	RCV000972201.1
1	1178848	1178848	p36.33	G	A	SNV	Exonic	C1QTNF12	ENST00000330388.2; NM_001014980.3	c.616C>T	p.Q206*	stop gain	Uncertain Significance				45	115005664	0.117
1	1179847	1179847	p36.33	C	T	SNV	Exonic	C1QTNF12	ENST00000330388.2; NM_001014980.3	c.208G>A	p.D70N	missense	Uncertain Significance	Damaging	0.04	Benign	21.6	769400296	0.002
1	1216971	1216971	p36.33	G	A	SNV	Promoter; Exonic; ncRNA; 5'UTR	SCNN1D	NR_037668.3; ENST00000338555.6; NM_001130413.4; ENST00000325425.12	c.-141G>A; c.258G>A; c.-668G>A; n.484G>A	p.P86P	synonymous	Likely Benign				< 10	185720857	0.235
1	1221530	1221530	p36.33	C	T	SNV	ncRNA; Exonic	SCNN1D	NR_037668.3; ENST00000338555.6; NM_001130413.4; ENST00000325425.12	c.783C>T; c.489C>T; n.915C>T; c.291C>T	p.V261V; p.V97V; p.V163V	synonymous	Likely Benign				< 10	146792102	0.033						5725773	4.35
1	1222571	1222571	p36.33	A	G	SNV	ncRNA; Exonic	SCNN1D	NR_037668.3; ENST00000338555.6; NM_001130413.4; ENST00000325425.12	c.1202A>G; c.710A>G; n.1334A>G; c.908A>G	p.Y237C; p.Y401C; p.Y303C	missense	Uncertain Significance			Probably Damaging	20.6	753007933	0.001
1	1226075	1226075	p36.33	G	A	SNV	Splice Site	SCNN1D	NR_037668.3; ENST00000338555.6; NM_001130413.4; ENST00000325425.12	n.2049+1G>A; c.1917+1G>A; c.1623+1G>A; c.1425+1G>A			Uncertain Significance				27.5
1	1226311	1226311	p36.33	C	T	SNV	ncRNA; Exonic	SCNN1D	NR_037668.3; ENST00000338555.6; NM_001130413.4; ENST00000325425.12	n.2086C>T; c.1954C>T; c.1462C>T; c.1660C>T	p.P554S; p.P488S; p.P652S	missense	Uncertain Significance			Benign	< 10	113608779	0.071
1	1226441	1226441	p36.33	C	T	SNV	Intronic	SCNN1D	NR_037668.3; ENST00000338555.6; NM_001130413.4; ENST00000325425.12	n.2109-4C>T; c.1977-4C>T; c.1683-4C>T; c.1485-4C>T			Likely Benign				< 10	114376334	0.116
1	1226669	1226669	p36.33	C	T	SNV	ncRNA; Exonic	SCNN1D	NR_037668.3; ENST00000338555.6; NM_001130413.4; ENST00000325425.12	c.1794C>T; n.2220C>T; c.2088C>T; c.1596C>T	p.C532C; p.C598C; p.C696C	synonymous	Uncertain Significance				< 10	145989045	0.033
1	1226852	1226852	p36.33	G	A	SNV	ncRNA; Exonic	SCNN1D	NR_037668.3; ENST00000338555.6; NM_001130413.4; ENST00000325425.12	n.2403G>A; c.2271G>A; c.1977G>A; c.1779G>A	p.P757P; p.P659P; p.P593P	synonymous	Likely Benign				< 10	147742851	0.132
1	1226912	1226912	p36.33	G	A	SNV	ncRNA; Exonic	SCNN1D	NR_037668.3; ENST00000338555.6; NM_001130413.4; ENST00000325425.12	c.2037G>A; n.2463G>A; c.2331G>A; c.1839G>A	p.M777I; p.M613I; p.M679I	missense	Uncertain Significance			Benign	12.86	75063133	0.221
1	1229483	1229483	p36.33	G	A	SNV	Exonic	ACAP3	ENST00000353662.4; ENST00000354700.10; NM_030649.3	c.2236C>T; c.2011C>T	p.L746L; p.L671L	synonymous	Uncertain Significance				< 10	370402861	0.087
1	1230846	1230846	p36.33	G	A	SNV	Exonic	ACAP3	ENST00000353662.4; ENST00000354700.10; NM_030649.3	c.1668C>T; c.1794C>T	p.A598A; p.A556A	synonymous	Uncertain Significance				< 10	146761111	0.086
1	1231280	1231280	p36.33	T	A	SNV	Exonic	ACAP3	ENST00000353662.4; ENST00000354700.10; NM_030649.3	c.1415A>T; c.1541A>T	p.E472V; p.E514V	missense	Uncertain Significance	Damaging	0	Possibly Damaging	27	139847292	0.192
1	1233967	1233967	p36.33	G	A	SNV	Exonic	ACAP3	ENST00000353662.4; ENST00000354700.10; NM_030649.3	c.717C>T; c.843C>T	p.N281N; p.N239N	synonymous	Likely Benign				< 10	141861939	0.14
1	1247302	1247302	p36.33	G	A	SNV	Exonic	INTS11	ENST00000620829.4; ENST00000540437.5; NM_001256456.2; NM_001256463.2; ENST00000545578.5; ENST00000618806.4; ENST00000421495.6; NM_001256460.2; NM_017871.6; ENST00000435064.6; ENST00000419704.5; NM_001256462.2	c.1740C>T; c.966C>T; c.1437C>T; c.1446C>T; c.1758C>T; c.1653C>T; c.1107C>T	p.D482D; p.D551D; p.D586D; p.D322D; p.D479D; p.D369D; p.D580D	synonymous	Likely Benign				< 10	146699248	0.093	RCV000893499.1
1	1248078	1248078	p36.33	C	G	SNV	Promoter; Exonic; Intronic	INTS11; MIR6727	ENST00000620829.4; ENST00000540437.5; NM_001256456.2; NM_001256463.2; ENST00000421495.6; ENST00000545578.5; NR_106785.1; ENST00000618806.4; NM_001256460.2; NM_017871.6; ENST00000435064.6; ENST00000419704.5; NM_001256462.2	c.994G>C; c.843+180G>C; n.-132G>C; c.1315G>C; c.1210G>C; c.1003G>C; c.523G>C; c.1297G>C	p.V404L; p.V335L; p.V439L; p.V433L; p.V332L; p.V175L	missense	Uncertain Significance	Tolerated	0.33	Benign	18.49	371662193	0.009
1	1250270	1250270	p36.33	G	A	SNV	Exonic; 5'UTR; Intronic	INTS11	ENST00000620829.4; ENST00000540437.5; NM_001256456.2; NM_001256463.2; ENST00000545578.5; ENST00000421495.6; ENST00000618806.4; NM_001256460.2; NM_017871.6; ENST00000435064.6; ENST00000419704.5; NM_001256462.2	c.333C>T; c.549C>T; c.-323C>T; c.654C>T; c.636C>T; c.342C>T; c.390-572C>T	p.D183D; p.D111D; p.D114D; p.D212D; p.D218D	synonymous	Uncertain Significance				11.07	34313161	0.117
1	1254482	1254482	p36.33	C	T	SNV	Exonic; Intronic	INTS11	ENST00000419704.5; ENST00000540437.5; NM_001256456.2; NM_001256463.2; ENST00000545578.5; ENST00000618806.4; ENST00000421495.6; NM_001256460.2; ENST00000429572.5; NM_017871.6; ENST00000435064.6; NM_001256462.2; ENST00000620829.4	c.342+194G>A; c.126+1894G>A; c.389+234G>A; c.429+194G>A; c.140-3488G>A; c.-529-3484G>A; c.447+194G>A; c.623G>A	p.R208H	missense	Uncertain Significance				< 10	561287725	0.034
1	1262957	1262957	p36.33	C	T	SNV	Exonic	CPTP	NM_001029885.2; ENST00000343938.9	c.459C>T	p.V153V	synonymous	Likely Benign				< 10	140494438	0.082
1	1267138	1267138	p36.33	G	A	SNV	Exonic	TAS1R3	ENST00000339381.6; NM_152228.3	c.312G>A	p.S104S	synonymous	Uncertain Significance				< 10	150804147	0.009
1	1267496	1267496	p36.33	G	A	SNV	Exonic	TAS1R3	ENST00000339381.6; NM_152228.3	c.585G>A	p.T195T	synonymous	Likely Benign				< 10	146097837	0.329
1	1267977	1267977	p36.33	G	A	SNV	Exonic	TAS1R3	ENST00000339381.6; NM_152228.3	c.1066G>A	p.E356K	missense	Uncertain Significance			Benign	12.9	138858544	0.017
1	1268623	1268623	p36.33	C	G	SNV	Intronic	TAS1R3	ENST00000339381.6; NM_152228.3	c.1480-16C>G			Uncertain Significance				< 10	372841042	0.081
1	1269475	1269475	p36.33	C	T	SNV	Exonic	TAS1R3	ENST00000339381.6; NM_152228.3	c.2190C>T	p.F730F	synonymous	Likely Benign				< 10	146800023	0.142
1	1271687	1271687	p36.33	G	A	SNV	Exonic	DVL1	NM_004421.3; NM_001330311.2; ENST00000610709.2; ENST00000378891.9	c.1170C>T; c.1923C>T; c.1848C>T	p.L616L; p.L641L; p.L390L	synonymous	Likely Benign				< 10	370097001	0.014	RCV000921663.1
1	1275688	1275688	p36.33	G	A	SNV	Promoter; Exonic; Intronic	MIR6808; DVL1	NM_004421.3; NR_106866.1; NM_001330311.2; ENST00000610709.2; ENST00000378891.9	c.708C>T; c.650+151C>T; n.-600C>T	p.S236S	synonymous	Likely Benign				< 10	139844875	0.048	RCV000964280.3
1	1284422	1284422	p36.33	G	A	SNV	Exonic	DVL1	NM_004421.3; NM_001330311.2; ENST00000610709.2; ENST00000378891.9	c.24C>T	p.Y8Y	synonymous	Uncertain Significance				< 10	1293233109	0.001
1	1289438	1289438	p36.33	C	T	SNV	Exonic	MXRA8	ENST00000309212.11; NM_001282584.2; ENST00000342753.8; NM_001282583.2; NM_001282585.1; NM_032348.4; NM_001282582.2; ENST00000445648.5	c.1167G>A; c.891G>A; c.1194G>A	p.M389I; p.M398I; p.M297I	missense	Likely Benign	Tolerated	0.36	Benign	< 10	140032389	0.186
1	1354717	1354717	p36.33	C	G	SNV	Exonic; 3'UTR	ANKRD65	NM_001145210.3; ENST00000427211.3; NM_001243535.2; NM_001375659.1; NM_001375660.1; ENST00000520296.5; NM_001243536.2; ENST00000442470.1	c.963G>C; c.422G>C; c.*205G>C	p.C141S; p.L321L	missense; synonymous	Uncertain Significance				< 10	147239403	0.158
1	1354762	1354762	p36.33	C	G	SNV	Exonic; 3'UTR	ANKRD65	NM_001145210.3; ENST00000427211.3; NM_001243535.2; NM_001375659.1; NM_001375660.1; ENST00000520296.5; NM_001243536.2; ENST00000442470.1	c.*160G>C; c.918G>C; c.377G>C	p.C126S; p.L306L	missense; synonymous	Uncertain Significance				< 10	181085315	0.096
1	1354844	1354844	p36.33	C	T	SNV	Exonic; 3'UTR	ANKRD65	NM_001145210.3; ENST00000427211.3; NM_001243535.2; NM_001375659.1; NM_001375660.1; ENST00000520296.5; NM_001243536.2; ENST00000442470.1	c.836G>A; c.*78G>A; c.295G>A	p.R279Q; p.E99K	missense	Uncertain Significance	Tolerated	0.59	Benign	14.39	140747215	0.37
1	1363180	1363180	p36.33	T	C	SNV	3'UTR	TMEM88B	NM_001146685.2	c.*13T>C			Likely Benign				< 10	551621615	0.391
1	1372773	1372773	p36.33	C	T	SNV	Exonic	VWA1	NM_199121.3; ENST00000338660.5; ENST00000476993.2; NM_022834.5	c.145C>T; c.540C>T	p.A180A; p.R49C	missense; synonymous	Likely Benign				< 10	11556017	0.303	RCV000963236.1
1	1374515	1374515	p36.33	G	A	SNV	Exonic; 3'UTR	VWA1	NM_199121.3; ENST00000338660.5; ENST00000476993.2; NM_022834.5	c.*96G>A; c.686G>A	p.R229H	missense	Uncertain Significance	Damaging	0	Benign	22.5	140102921	0.033
1	1386090	1386090	p36.33	G	A	SNV	Exonic	ATAD3C	NM_001039211.3; ENST00000378785.7	c.27G>A	p.A9A	synonymous	Uncertain Significance				< 10	375341112	0.025						2230000	0.27
1	1392503	1392503	p36.33	C	T	SNV	Intronic	ATAD3C	NM_001039211.3; ENST00000378785.7	c.690-6C>T			Uncertain Significance				< 10	184907850	0.196
1	1392521	1392521	p36.33	T	C	SNV	Exonic	ATAD3C	NM_001039211.3; ENST00000378785.7	c.702T>C	p.F234F	synonymous	Uncertain Significance				< 10	552345395	0.039
1	1392522	1392522	p36.33	G	A	SNV	Exonic	ATAD3C	NM_001039211.3; ENST00000378785.7	c.703G>A	p.V235M	missense	Uncertain Significance	Damaging	0.05	Benign	13.69	569394514	0.035
1	1403772	1403772	p36.33	G	A	SNV	Exonic	ATAD3C	NM_001039211.3; ENST00000378785.7	c.1098G>A	p.A366A	synonymous	Likely Benign				< 10	144333159	0.203
1	1417612	1417612	p36.33	T	C	SNV	Exonic	ATAD3B	NM_031921.6; ENST00000673477.1; NM_001317238.2	c.609T>C; c.471T>C	p.N157N; p.N203N	synonymous	Uncertain Significance				< 10	139351654	0.032
1	1431007	1431007	p36.33	C	T	SNV	Exonic	ATAD3B	NM_031921.6; ENST00000673477.1; NM_001317238.2	c.1619C>T; c.1757C>T	p.S540F; p.S586F	missense	Uncertain Significance	Damaging	0	Benign	15.03	149788676	0.126
1	1458885	1458885	p36.33	C	T	SNV	Intronic	ATAD3A	ENST00000378755.9; NM_001170535.3; NM_018188.5; NM_001170536.3; ENST00000536055.6; ENST00000378756.8	c.670-6C>T; c.1051-6C>T; c.907-6C>T			Uncertain Significance				< 10	372490360	0.008
1	1460614	1460614	p36.33	T	C	SNV	Intronic	ATAD3A	ENST00000378755.9; NM_001170535.3; NM_018188.5; NM_001170536.3; ENST00000536055.6; ENST00000378756.8	c.1359-6T>C; c.1215-6T>C; c.978-6T>C			Likely Benign				< 10	112869160	0.311	RCV000968504.1
1	1469412	1469412	p36.33	C	T	SNV	Exonic	ATAD3A	ENST00000378755.9; NM_001170535.3; NM_018188.5; NM_001170536.3; ENST00000536055.6; ENST00000378756.8	c.1721C>T; c.1865C>T; c.1484C>T	p.A574V; p.A495V; p.A622V	missense	Uncertain Significance	Tolerated	0.29	Benign	< 10	145341309	0.099
1	1509841	1509841	p36.33	G	A	SNV	Intronic	SSU72	NM_014188.3; ENST00000359060.5; ENST00000291386.4	c.80+17C>T			Uncertain Significance				10.42	374497992	0.066
1	1563986	1563986	p36.33	G	A	SNV	Exonic; ncRNA	MIB2	ENST00000378712.5; ENST00000520777.5; ENST00000518681.5; NR_033183.2; NM_001170686.4; NM_080875.5; NM_001170687.4; ENST00000505820.6; ENST00000504599.5; NM_001170688.2; NM_001170689.2; ENST00000355826.9	c.2236G>A; c.2389G>A; c.2128G>A; c.1891G>A; c.2074G>A; c.2086G>A; c.2431G>A; c.2419G>A; n.2174G>A	p.A696T; p.A797T; p.A631T; p.A710T; p.A746T; p.A811T; p.A692T; p.A807T	missense	Uncertain Significance	Tolerated	0.09		17.42	373596032	0.013
1	1635711	1635711	p36.33	C	T	SNV	Exonic; ncRNA	CDK11A	NR_132740.2; NR_132739.2; NM_024011.4; NM_001313982.2; NM_001313896.2; ENST00000357760.6; ENST00000404249.8; ENST00000378633.5; NM_033529.4; ENST00000358779.9	c.1607G>A; c.1634G>A; c.1646G>A; n.1634G>A; c.1637G>A; n.1673G>A	p.R546H; p.R536H; p.R545H; p.R549H	missense	Uncertain Significance	Damaging	0	Probably Damaging	25.4	369035896	0.009
1	1636352	1636352	p36.33	G	C	SNV	Exonic; ncRNA	CDK11A	NR_132740.2; NR_132739.2; NM_024011.4; NM_001313982.2; NM_001313896.2; ENST00000404249.8; ENST00000357760.6; ENST00000378633.5; NM_033529.4; ENST00000358779.9	c.1419C>G; c.1458C>G; n.1485C>G; n.1446C>G; c.1449C>G; c.1446C>G	p.V486V; p.V483V; p.V473V; p.V482V	synonymous	Uncertain Significance				12.46	141881351	0.083
1	1670415	1670415	p36.33	C	T	SNV	ncRNA; Exonic	SLC35E2A	NM_182838.3; ENST00000246421.4; ENST00000647043.1; NM_001199787.2	c.404G>A; n.1165G>A; n.820G>A	p.R135Q	missense	Uncertain Significance	Damaging	0.01	Probably Damaging	26.9	139401485	0.782
1	1685713	1685713	p36.33	C	T	SNV	Intronic	NADK	NM_001198994.2; NM_001198993.2; ENST00000341991.7; NM_001353642.2; NM_001353641.2; NM_023018.5; ENST00000378625.5; NM_001198995.1; ENST00000341426.9	c.682+10G>A; c.943+10G>A; c.847+10G>A; c.1378+10G>A			Likely Benign				< 10	180881514	0.16
1	1688719	1688719	p36.33	C	A	SNV	Exonic	NADK	NM_001198994.2; NM_001198993.2; ENST00000341991.7; NM_001353642.2; NM_001353641.2; NM_023018.5; ENST00000378625.5; ENST00000341426.9; NM_001198995.1	c.198G>T; c.606G>T; c.294G>T; c.33G>T	p.L11L; p.L66L; p.L98L; p.L202L	synonymous	Likely Benign				< 10	78921781	0.288
1	1690621	1690621	p36.33	G	A	SNV	Promoter; Exonic; Intronic	NADK	NM_001198994.2; NM_001198993.2; NM_001353642.2; NM_001353641.2; ENST00000341991.7; NM_023018.5; ENST00000378625.5; NM_001198995.1; ENST00000341426.9	c.-651C>T; c.264-1872C>T; c.3-1872C>T; c.494C>T	p.P165L	missense	Likely Benign	Tolerated	0.42		16.36	186603783	0.209	RCV000889496.2
1	1691199	1691199	p36.33	C	T	SNV	Promoter; Exonic; Intronic	NADK	NM_001198994.2; NM_001198993.2; ENST00000341991.7; NM_001353642.2; NM_001353641.2; NM_023018.5; ENST00000378625.5; ENST00000341426.9; NM_001198995.1	c.406G>A; c.-1229G>A; c.2+2131G>A; c.263+2192G>A	p.G136S	missense	Likely Benign	Tolerated	0.76		< 10	183152010	0.224
1	1721996	1721996	p36.33	C	T	SNV	Exonic	GNB1	ENST00000378609.9; NM_001282538.2; NM_002074.5; NM_001282539.2	c.537G>A; c.237G>A	p.T179T; p.T79T	synonymous	Uncertain Significance				< 10	1332565193	0						4025106	0.22
1	1846710	1846710	p36.33	G	C	SNV	5'UTR	CALML6	NM_138705.4; ENST00000307786.8; NM_001330313.2	c.-10G>C			Likely Benign				< 10	140034981	0.157
1	1857765	1857765	p36.33	G	A	SNV	Exonic	CFAP74	NM_001304360.2	c.3850C>T	p.P1284S	missense	Uncertain Significance				23.6	571374143	0.157
1	1858100	1858100	p36.33	C	T	SNV	Exonic	CFAP74	NM_001304360.2	c.3763G>A	p.V1255I	missense	Likely Benign				< 10	116159725	0.313
1	1896438	1896438	p36.33	C	T	SNV	Exonic	CFAP74	NM_001304360.2	c.1464G>A	p.L488L	synonymous	Uncertain Significance				< 10
1	1959704	1959704	p36.33	A	G	SNV	Exonic	GABRD	ENST00000378585.7; NM_000815.5	c.664A>G	p.T222A	missense	Uncertain Significance	Tolerated	0.16	Benign	15.7	146853417	0.002
1	1986954	1986954	p36.33	G	A	SNV	Exonic	PRKCZ	NM_002744.6	c.146G>A	p.R49H	missense	Likely Benign	Tolerated	0.21	Benign	13.56	35271800	0.247	RCV000886312.1
1	2116357	2116357	p36.33	A	G	SNV	Promoter; Intronic; 3'UTR	PRKCZ-AS1; FAAP20; PRKCZ	NM_001282673.2; NM_001350806.2; NR_146911.2; NM_001282672.2; NM_001033582.3; NM_001242874.3; NM_001350803.2; NM_001282671.2; ENST00000400921.6; NM_001146310.2; NM_001256945.2; NM_001033581.3; NM_001350804.2; NM_001350805.2; NR_146290.1; NM_002744.6	n.-1043T>C; c.*360T>C; c.*553T>C; c.1167-4A>G; c.1143-4A>G; c.981-4A>G; c.1380-4A>G; c.1692-4A>G; n.1707-4A>G			Uncertain Significance				< 10	143732365	0.026
1	2235784	2235784	p36.33	C	T	SNV	Exonic	SKI	NM_003036.4; ENST00000378536.5	c.1527C>T	p.S509S	synonymous	Likely Benign				< 10	111935632	0.086	RCV001087151.2; RCV000199331.4; RCV000245139.1; RCV000755634.3	942895
1	2268264	2268264	p36.33	G	A	SNV	Exonic	MORN1	NM_024848.3; ENST00000378531.8	c.1062C>T	p.P354P	synonymous	Uncertain Significance				< 10	143883437	0.034
1	2316442	2316442	p36.32	C	T	SNV	Exonic; ncRNA	MORN1	NM_024848.3; NM_001301060.2; NR_125361.2; ENST00000378531.8; ENST00000378529.7	c.512G>A; n.461G>A	p.R171H	missense	Uncertain Significance	Tolerated	0.54	Benign	< 10	142675526	0.079
1	2340159	2340159	p36.32	A	G	SNV	Exonic; 5'UTR; ncRNA	PEX10	NM_001374426.1; ENST00000447513.7; NR_164636.1; NM_153818.2; NM_001374427.1; ENST00000288774.8; NM_002617.4; NM_001374425.1	c.332T>C; c.-101T>C; n.451T>C	p.L111P	missense	Likely Benign	Tolerated	0.36	Benign	16.26	35426403	0.166	RCV001272168.1; RCV001099331.1; RCV001080096.2; RCV000676045.3
1	2433975	2433975	p36.32	G	A	SNV	Intronic; Exonic	PLCH2	NM_001303013.1; ENST00000378486.8; NM_001303012.2; NM_014638.4	c.3005G>A; c.3019+127G>A; c.2959+127G>A	p.G1002D	missense	Uncertain Significance				11.24	145016673	0.246
1	2433976	2433976	p36.32	C	T	SNV	Intronic; Exonic	PLCH2	NM_001303013.1; ENST00000378486.8; NM_001303012.2; NM_014638.4	c.3019+128C>T; c.2959+128C>T; c.3006C>T	p.G1002G	synonymous	Likely Benign				< 10	529444887	0.161
1	2435831	2435833	p36.32	TCC		Deletion	Exonic; 3'UTR	PLCH2	NM_001303013.1; ENST00000378486.8; NM_001303012.2; NM_014638.4	c.*416_*418delTCC; c.3439_3441delTCC; c.*774_*776delTCC	p.S1148del	in-frame	Likely Benign				14.15	555614613	0.175	RCV000972203.1
1	2444314	2444314	p36.32	C	T	SNV	Intronic	PANK4	ENST00000435556.8; NM_018216.4; ENST00000378466.9	c.1610+13G>A; c.1727+13G>A			Likely Benign				< 10	143665029	0.208
1	2492123	2492123	p36.32	G	A	SNV	Exonic	TNFRSF14	NM_003820.4; NM_001297605.2; ENST00000355716.5	c.521G>A	p.G174E	missense	Uncertain Significance	Damaging	0	Benign	13.36	11573986	0.2	RCV000122169.1
1	2519890	2519891	p36.32		AGGTG	Insertion	Exonic; ncRNA	PRXL2B	NR_036637.2; ENST00000444521.6; NM_001195736.3; ENST00000419916.8; ENST00000378425.9; NM_001195737.3; NM_152371.5; NM_001195738.3; NM_001195740.3; NR_036638.2; ENST00000537325.6; ENST00000378427.6; NM_001195741.3	c.527_528+3dupAGGTG; c.383_384+3dupAGGTG; n.389_390+3dupAGGTG; c.473_474+3dupAGGTG; c.437_438+3dupAGGTG			Uncertain Significance				27	543394429	0.093
1	2520428	2520428	p36.32	C	A	SNV	Exonic; ncRNA	PRXL2B	NR_036637.2; ENST00000444521.6; NM_001195736.3; ENST00000419916.8; ENST00000378425.9; NM_001195737.3; NM_152371.5; NM_001195738.3; NM_001195740.3; NR_036638.2; ENST00000537325.6; ENST00000378427.6; NM_001195741.3	c.510C>A; c.582C>A; n.502C>A; c.672C>A; n.534C>A; c.528C>A; c.516C>A; c.420C>A; c.496C>A; c.417C>A	p.I176I; p.P166T; p.I140I; p.I224I; p.I139I; p.I194I; p.I172I; p.I170I	missense; synonymous	Likely Benign				< 10	115817728	0.093
1	2523418	2523418	p36.32	C	T	SNV	Exonic	MMEL1	ENST00000378412.8; ENST00000502556.5; NM_033467.4	c.1645G>A; c.2116G>A	p.G706S; p.G549S	missense	Uncertain Significance	Damaging	0.04	Probably Damaging	25.3	141763894	0.09
1	2524164	2524164	p36.32	G	A	SNV	Intronic	MMEL1	ENST00000378412.8; ENST00000502556.5; NM_033467.4	c.2002-5C>T; c.1531-5C>T			Likely Benign				< 10	115709124	0.174	RCV000892891.2
1	2525272	2525272	p36.32	C	T	SNV	Exonic	MMEL1	ENST00000378412.8; ENST00000502556.5; NM_033467.4	c.1848G>A; c.1377G>A	p.T616T; p.T459T	synonymous	Likely Benign				< 10	61729819	0.179	RCV000892892.2
1	2535632	2535632	p36.32	T	C	SNV	Intronic; Exonic	MMEL1	ENST00000378412.8; ENST00000502556.5; NM_033467.4	c.905A>G; c.481-220A>G	p.Q302R	missense	Likely Benign	Tolerated	0.72	Benign	< 10	114540215	0.144	RCV000884852.1
1	2938395	2938395	p36.32	G	A	SNV	Exonic	ACTRT2	NM_080431.5; ENST00000378404.4	c.145G>A	p.A49T	missense	Likely Benign	Tolerated	0.64	Benign	< 10	35209244	0.123
1	2938506	2938506	p36.32	G	A	SNV	Exonic	ACTRT2	NM_080431.5; ENST00000378404.4	c.256G>A	p.V86M	missense	Likely Benign	Activating	1	Benign	< 10	34872045	0.124
1	2938580	2938580	p36.32	G	A	SNV	Exonic	ACTRT2	NM_080431.5; ENST00000378404.4	c.330G>A	p.T110T	synonymous	Likely Benign				< 10	35037954	0.127
1	2938810	2938810	p36.32	G	A	SNV	Exonic	ACTRT2	NM_080431.5; ENST00000378404.4	c.560G>A	p.R187K	missense	Uncertain Significance	Damaging	0.05	Benign	20.2
1	2939117	2939117	p36.32	C	T	SNV	Exonic	ACTRT2	NM_080431.5; ENST00000378404.4	c.867C>T	p.T289T	synonymous	Likely Benign				< 10	35299319	0.12
1	2939138	2939138	p36.32	T	C	SNV	Exonic	ACTRT2	NM_080431.5; ENST00000378404.4	c.888T>C	p.F296F	synonymous	Likely Benign				< 10	35852409	0.127
1	2985810	2985810	p36.32	C	A	SNV	Promoter; 5'UTR	PRDM16-DT; PRDM16	NM_022114.4; NR_015440.1; NM_199454.3; ENST00000270722.10; ENST00000378391.6; NR_024371.1	c.-14C>A; n.-1521G>T			Uncertain Significance				12.97	180925565	0.043	RCV000214266.2
1	3322097	3322097	p36.32	C	T	SNV	Exonic	PRDM16	NM_022114.4; NM_199454.3; ENST00000270722.10; ENST00000378391.6	c.1071C>T	p.R357R	synonymous	Likely Benign				10.18	2483221	0.313	RCV000204192.7; RCV000220538.2
1	3328117	3328117	p36.32	G	A	SNV	Exonic	PRDM16	NM_022114.4; NM_199454.3; ENST00000270722.10; ENST00000378391.6	c.1356G>A	p.T452T	synonymous	Uncertain Significance				< 10	567761188	0.006	RCV001477642.1; RCV000600713.1
1	3328445	3328445	p36.32	G	A	SNV	Exonic	PRDM16	NM_022114.4; NM_199454.3; ENST00000270722.10; ENST00000378391.6	c.1684G>A	p.V562I	missense	Uncertain Significance	Tolerated	0.6	Benign	13.13	150395260	0.064	RCV000459912.6; RCV000223463.3
1	3328576	3328576	p36.32	G	A	SNV	Exonic	PRDM16	NM_022114.4; NM_199454.3; ENST00000270722.10; ENST00000378391.6	c.1815G>A	p.E605E	synonymous	Uncertain Significance				10.01	566856228	0.004	RCV000607861.1
1	3328852	3328852	p36.32	A	T	SNV	Exonic	PRDM16	NM_022114.4; NM_199454.3; ENST00000270722.10; ENST00000378391.6	c.2091A>T	p.A697A	synonymous	Likely Benign				< 10	35184988	0.202	RCV000470201.6; RCV000215257.2
1	3385517	3385517	p36.32	C	T	SNV	Intronic	ARHGEF16	NM_014448.4; ENST00000378378.9; ENST00000378371.6; ENST00000378373.5	c.861+17C>T; c.-4+17C>T			Uncertain Significance				< 10	759329587	0.01
1	3412438	3412438	p36.32	T		Deletion	Intronic	MEGF6	NM_001409.4; ENST00000294599.8; ENST00000356575.9	c.3166+16delA; c.3871+16delA			Likely Benign				0.947		0.182
1	3413601	3413601	p36.32	G	A	SNV	Intronic; Exonic	MEGF6	NM_001409.4; ENST00000294599.8; ENST00000356575.9	c.2908+196C>T; c.3564C>T	p.T1188T	synonymous	Likely Benign				< 10	137946338	0.146
1	3418399	3418399	p36.32	G	A	SNV	Exonic	MEGF6	NM_001409.4; ENST00000294599.8; ENST00000356575.9	c.1960C>T; c.2275C>T	p.R759W; p.R654W	missense	Likely Benign	Tolerated	0.19	Benign	14.17	61735149	0.154	RCV000967897.2
1	3418412	3418412	p36.32	G	A	SNV	Exonic	MEGF6	NM_001409.4; ENST00000294599.8; ENST00000356575.9	c.2262C>T; c.1947C>T	p.V649V; p.V754V	synonymous	Likely Benign				< 10	61734255	0.292	RCV000967898.2
1	3428556	3428556	p36.32	G	A	SNV	Intronic	MEGF6	NM_001409.4; ENST00000294599.8; ENST00000356575.9	c.976+14C>T; c.661+14C>T			Likely Benign				< 10	181904013	0.243
1	3440795	3440795	p36.32	C	A	SNV	Exonic	MEGF6	NM_001409.4; ENST00000294599.8; ENST00000356575.9	c.182G>T; c.497G>T	p.R166L; p.R61L	missense	Uncertain Significance	Tolerated	0.22	Benign	11.65	148559223	0.064
1	3496417	3496417	p36.32	G	A	SNV	Exonic	MEGF6	NM_001409.4; ENST00000356575.9	c.453C>T	p.P151P	synonymous	Likely Benign				< 10	115018369	0.273	RCV000961251.1
1	3679925	3679925	p36.32	T	C	SNV	Exonic	CCDC27	ENST00000294600.7; NM_152492.3	c.1208T>C	p.L403P	missense	Uncertain Significance	Damaging	0.02	Probably Damaging	19.73	138987139	0.104
1	3688053	3688053	p36.32	T	G	SNV	Promoter; Exonic	CCDC27; SMIM1	ENST00000444870.7; NM_001288583.2; ENST00000642557.4; ENST00000294600.7; NM_001379691.1; NM_152492.3; NM_001163724.3; NM_001379690.1; ENST00000561886.2	c.-1428T>G; c.-1547T>G; c.-1375T>G; c.-1494T>G; c.1937T>G	p.L646R	missense	Uncertain Significance	Tolerated	0.06	Possibly Damaging	17.47	79789173	0.148
1	3699324	3699324	p36.32	G	A	SNV	Promoter; Exonic	LRRC47; RN7SL574P	ENST00000581512.1; ENST00000378251.3; NM_020710.3	c.1314C>T; n.-55G>A	p.Y438Y	synonymous	Likely Benign				< 10	140553112	0.489
1	3745870	3745870	p36.32	C	T	SNV	Exonic	CEP104	ENST00000674558.1; ENST00000674544.1; NM_014704.4; ENST00000675666.1; ENST00000674623.1; ENST00000676052.1; ENST00000675677.1; ENST00000675375.1	c.1937G>A; c.1913G>A; c.2111G>A; c.2129G>A	p.G704E; p.G638E; p.G710E; p.G646E	missense	Uncertain Significance	Tolerated	0.95	Benign	16.49	139181137	0.093	RCV001557060.1
1	3761547	3761547	p36.32	C	A	SNV	Exonic	CEP104	ENST00000674558.1; ENST00000674544.1; ENST00000674623.1; ENST00000675666.1; NM_014704.4; ENST00000676052.1; ENST00000675677.1; ENST00000494653.5; ENST00000675375.1; ENST00000378223.3	c.490G>T; c.316G>T; c.508G>T	p.A164S; p.A106S; p.A170S	missense	Likely Benign	Tolerated	1	Benign	12.82	140856596	0.162	RCV000878188.2; RCV001585851.1
1	3807360	3807360	p36.32	G	A	SNV	Exonic	C1orf174	NM_207356.3; ENST00000361605.4	c.391C>T	p.R131C	missense	Likely Benign	Tolerated	0.12	Benign	< 10	76727703	0.219
1	3809520	3809520	p36.32	C	T	SNV	Exonic	C1orf174	NM_207356.3; ENST00000361605.4	c.56G>A	p.R19Q	missense	Uncertain Significance	Damaging	0.04	Benign	12.25	79466209	0.26
1	4772060	4772060	p36.32	C	T	SNV	Exonic	AJAP1	NM_018836.4; NM_001042478.2; ENST00000378191.5	c.130C>T	p.L44L	synonymous	Likely Benign				< 10	146622911	0.032
1	5924500	5924500	p36.31	G	A	SNV	Promoter; Exonic; ncRNA	NPHP4; MIR4689	NM_001291593.2; ENST00000582517.1; ENST00000378156.9; NM_001291594.2; NR_039838.1; NM_015102.5; NR_111987.2	c.3894C>T; c.2355C>T; n.-1699C>T; c.2358C>T; n.4661C>T	p.A1298A; p.A786A; p.A785A	synonymous	Likely Benign				< 10	60094861	0.131	RCV001101946.1; RCV001101947.1; RCV000539655.4
1	5950939	5950939	p36.31	C	T	SNV	Exonic; ncRNA	NPHP4	NM_001291593.2; ENST00000378156.9; NM_001291594.2; NM_015102.5; NR_111987.2	c.754G>A; c.757G>A; c.2293G>A; n.2510G>A	p.V765I; p.V253I; p.V252I	missense	Likely Benign	Tolerated	0.28	Benign	14.86	149244006	0.128	RCV000081707.4; RCV001098669.1; RCV000196064.4; RCV001098670.1
1	6145316	6145316	p36.31	C	T	SNV	Intronic; 3'UTR	KCNAB2	NM_001199863.2; ENST00000663169.1; ENST00000666299.1; NM_003636.4; ENST00000671676.1; NM_001199862.2; ENST00000458166.6; ENST00000602612.5; ENST00000164247.5; ENST00000428161.6; NM_001199861.2; ENST00000352527.6; ENST00000666163.1; NM_172130.3; NM_001199860.2; ENST00000378097.6; ENST00000662363.1; ENST00000656198.1; ENST00000669250.1; ENST00000668559.1; ENST00000653262.1; ENST00000378083.7; ENST0…	c.326+8C>T; c.419+8C>T; c.125+8C>T; c.425+8C>T; c.*4C>T; c.284+8C>T			Uncertain Significance				< 10	200151183	0.018
1	6155484	6155484	p36.31	G	A	SNV	Exonic	KCNAB2	NM_001199863.2; NM_003636.4; ENST00000671676.1; NM_001199862.2; ENST00000458166.6; ENST00000602612.5; ENST00000164247.5; ENST00000428161.6; NM_001199861.2; ENST00000352527.6; ENST00000666163.1; NM_172130.3; NM_001199860.2; ENST00000662363.1; ENST00000378097.6; ENST00000669250.1; ENST00000668559.1; ENST00000653262.1; ENST00000378083.7; ENST00000341524.6	c.735G>A; c.648G>A; c.834G>A; c.783G>A; c.690G>A; c.489G>A	p.P261P; p.P163P; p.P230P; p.P278P; p.P245P; p.P216P	synonymous	Likely Benign				< 10	116542179	0.144	RCV000892776.2
1	6158540	6158540	p36.31	C	T	SNV	Intronic; 3'UTR	KCNAB2	NM_001199863.2; NM_003636.4; ENST00000671676.1; NM_001199862.2; ENST00000164247.5; ENST00000458166.6; ENST00000352527.6; ENST00000428161.6; NM_001199861.2; ENST00000602612.5; ENST00000666163.1; NM_172130.3; NM_001199860.2; ENST00000662363.1; ENST00000378097.6; ENST00000669250.1; ENST00000653262.1; ENST00000378083.7; ENST00000341524.6	c.973-5C>T; c.1015-5C>T; c.1060-5C>T; c.*25-5C>T; c.814-5C>T; c.*949C>T; c.1159-5C>T; c.1108-5C>T			Likely Benign				< 10	111754266	0.152	RCV000894391.2
1	6166337	6166337	p36.31	C	T	SNV	3'UTR	CHD5	ENST00000262450.8; NM_015557.3	c.*3G>A			Uncertain Significance				14.38	144852211	0.223
1	6170583	6170583	p36.31	G	A	SNV	Exonic	CHD5	ENST00000262450.8; NM_015557.3	c.5253C>T	p.H1751H	synonymous	Uncertain Significance				< 10	150576856	0.019						9120019	0.83
1	6172270	6172270	p36.31	G	A	SNV	Exonic	CHD5	ENST00000262450.8; NM_015557.3	c.5070C>T	p.D1690D	synonymous	Uncertain Significance				< 10	145305767	0.02
1	6181215	6181215	p36.31	C	T	SNV	Exonic	CHD5	ENST00000262450.8; NM_015557.3	c.4862G>A	p.R1621Q	missense	Uncertain Significance	Tolerated	0.5	Benign	18.17	147417867	0.068	RCV000903484.1
1	6195328	6195328	p36.31	G	A	SNV	Exonic	CHD5	ENST00000262450.8; NM_015557.3	c.2832C>T	p.T944T	synonymous	Likely Benign				< 10	116550066	0.147	RCV000892777.1
1	6212569	6212569	p36.31	C	G	SNV	Exonic	CHD5	ENST00000262450.8; NM_015557.3	c.773G>C	p.G258A	missense	Uncertain Significance	Tolerated	0.62	Benign	15.94	201483063	0.009
1	6270306	6270306	p36.31	C	T	SNV	Exonic	RNF207	NM_207396.3	c.824C>T	p.A275V	missense	Uncertain Significance	Damaging	0.05	Possibly Damaging	24.7	148563561	0.022
1	6305557	6305557	p36.31	A	G	SNV	Exonic	HES3	NM_001024598.4; ENST00000377898.4	c.551A>G	p.D184G	missense	Likely Benign			Benign	< 10	74925124	0.346
1	6314138	6314138	p36.31	C	T	SNV	Exonic	GPR153	NM_207370.4; ENST00000377893.3	c.426G>A	p.S142S	synonymous	Uncertain Significance				11.43	144327337	0.154
1	6409896	6409896	p36.31	G	A	SNV	Exonic	ACOT7	NM_181866.3; NM_007274.4; ENST00000361521.9; ENST00000545482.5; ENST00000377855.6; NM_181864.3; ENST00000377845.7; ENST00000377842.7; ENST00000608083.5; NM_181865.3	c.78C>T; c.174C>T; c.51C>T; c.114C>T; c.204C>T	p.A68A; p.A38A; p.A17A; p.A58A; p.A26A	synonymous	Likely Benign				< 10	146476044	0.141
1	6479766	6479766	p36.31	C	T	SNV	Intronic	HES2	NM_019089.5; ENST00000377834.8; ENST00000377837.5; ENST00000489730.1; ENST00000377836.8	c.46-4G>A			Uncertain Significance				11.77	182995155	0.224
1	6485265	6485265	p36.31	G	T	SNV	Promoter; Exonic	ESPN; HES2	NM_001367474.1; ENST00000377837.5; NM_001367473.1; ENST00000645284.1; NM_031475.3	c.250G>T; c.-751C>A	p.A84S	missense	Likely Benign	Tolerated	0.17	Benign	15.54	184469259	0.142	RCV000827081.3
1	6500332	6500332	p36.31	C	T	SNV	Exonic	ESPN	NM_001367474.1; NM_001367473.1; NM_031475.3; ENST00000645284.1	c.507C>T	p.T169T	synonymous	Uncertain Significance				14.11	1233723762	0.003
1	6504619	6504619	p36.31	C	T	SNV	Exonic	ESPN	NM_001367474.1; NM_001367473.1; ENST00000645284.1; NM_031475.3	c.1069C>T	p.P357S	missense	Likely Benign	Damaging	0.03	Probably Damaging	25.1	116413227	0.287	RCV000155360.1; RCV001001540.2; RCV000882994.2
1	6505721	6505721	p36.31	C	T	SNV	Intronic	ESPN	NM_001367474.1; NM_001367473.1; NM_031475.3; ENST00000645284.1	c.1193-3C>T			Uncertain Significance				11.85	201999263	0.034	RCV000611306.1
1	6511826	6511826	p36.31	G	A	SNV	Intronic	ESPN	NM_001367474.1; NM_001367473.1; NM_031475.3; ENST00000645284.1; ENST00000461727.6	c.1971+18G>A; c.1998+18G>A; c.2061+18G>A; c.363+18G>A			Uncertain Significance				< 10	373076037	0.053
1	6522208	6522208	p36.31	G	A	SNV	Exonic	TNFRSF25	ENST00000377782.7; ENST00000356876.8; NM_148965.2; NM_148966.2; ENST00000351959.9; NM_003790.3; NM_148967.2; NM_148970.2; ENST00000351748.7; ENST00000348333.7	c.798C>T; c.771C>T; c.636C>T; c.660C>T; c.222C>T	p.S266S; p.S212S; p.S257S; p.S220S; p.S74S	synonymous	Likely Benign				< 10	34221914	0.354	RCV000892331.1
1	6529136	6529136	p36.31	G	A	SNV	Exonic	PLEKHG5	NM_020631.6; NM_001265592.2; NM_001042664.1; ENST00000377728.8; ENST00000377740.5; ENST00000675123.1; NM_001042665.1; NM_001265594.2; ENST00000400915.8; ENST00000377748.6; ENST00000535355.6; ENST00000537245.6; ENST00000377732.5; ENST00000673471.2; NM_198681.4; ENST00000675694.1; ENST00000377725.5; NM_001042663.3; NM_001265593.1	c.2215C>T; c.2326C>T; c.2422C>T; c.2512C>T; c.2389C>T	p.R797W; p.R776W; p.R739W; p.R838W; p.R808W	missense	Uncertain Significance	Damaging	0.01		25.6	189468475	0.002	RCV000792452.3
1	6529191	6529191	p36.31	C	T	SNV	Exonic	PLEKHG5	NM_020631.6; NM_001265592.2; NM_001042664.1; ENST00000377728.8; ENST00000377740.5; ENST00000675123.1; NM_001042665.1; NM_001265594.2; ENST00000400915.8; ENST00000377748.6; ENST00000535355.6; ENST00000537245.6; ENST00000377732.5; ENST00000673471.2; NM_198681.4; ENST00000675694.1; ENST00000377725.5; NM_001042663.3; NM_001265593.1	c.2367G>A; c.2334G>A; c.2271G>A; c.2160G>A; c.2457G>A	p.E720E; p.E778E; p.E789E; p.E757E; p.E819E	synonymous	Uncertain Significance				< 10	867638588		RCV000351675.2; RCV001082146.2; RCV000264925.3
1	6529641	6529641	p36.31	G	A	SNV	Exonic	PLEKHG5	NM_020631.6; NM_001265592.2; NM_001042664.1; ENST00000377728.8; ENST00000377740.5; ENST00000675123.1; NM_001042665.1; NM_001265594.2; ENST00000400915.8; ENST00000377748.6; ENST00000535355.6; ENST00000537245.6; ENST00000675694.1; ENST00000377732.5; NM_198681.4; ENST00000673471.2; ENST00000377725.5; NM_001042663.3; NM_001265593.1	c.1896C>T; c.2007C>T; c.2193C>T; c.2103C>T; c.2070C>T	p.L669L; p.L701L; p.L632L; p.L731L; p.L690L	synonymous	Likely Benign				< 10	61732221	0.051	RCV000436490.2; RCV000876582.3
1	6530372	6530372	p36.31	G	A	SNV	Exonic	PLEKHG5	NM_020631.6; NM_001265592.2; NM_001042664.1; ENST00000377728.8; ENST00000377740.5; ENST00000675123.1; NM_001042665.1; NM_001265594.2; ENST00000400915.8; ENST00000377748.6; ENST00000535355.6; ENST00000675694.1; ENST00000537245.6; ENST00000377732.5; NM_198681.4; ENST00000673471.2; ENST00000377725.5; NM_001042663.3; NM_001265593.1	c.1931C>T; c.1898C>T; c.1835C>T; c.1724C>T; c.2021C>T	p.P633L; p.P644L; p.P575L; p.P674L; p.P612L	missense	Likely Benign	Activating	0.71		16.07	77134982	0.098	RCV000421655.2; RCV001082221.2; RCV001099855.1; RCV000513012.4
1	6533415	6533415	p36.31	C	T	SNV	Exonic	PLEKHG5	NM_020631.6; NM_001265592.2; NM_001042664.1; ENST00000377728.8; ENST00000377740.5; ENST00000675123.1; NM_001042665.1; NM_001265594.2; ENST00000400915.8; ENST00000377748.6; ENST00000535355.6; ENST00000537245.6; ENST00000675694.1; NM_198681.4; ENST00000377732.5; ENST00000673471.2; ENST00000377725.5; NM_001042663.3; NM_001265593.1	c.802G>A; c.865G>A; c.691G>A; c.988G>A; c.898G>A	p.G268S; p.G300S; p.G289S; p.G231S; p.G330S	missense	Likely Benign				< 10	146651455	0.164	RCV000397744.2; RCV000536368.5; RCV000180357.4
1	6534230	6534230	p36.31	T	C	SNV	Intronic	PLEKHG5	NM_020631.6; NM_001265592.2; NM_001042664.1; ENST00000377728.8; ENST00000377740.5; ENST00000675123.1; NM_001042665.1; NM_001265594.2; ENST00000400915.8; ENST00000377748.6; ENST00000535355.6; ENST00000537245.6; ENST00000675694.1; ENST00000377732.5; NM_198681.4; ENST00000673471.2; ENST00000377725.5; NM_001042663.3; NM_001265593.1	c.614-6A>G; c.440-6A>G; c.737-6A>G; c.551-6A>G; c.647-6A>G			Likely Benign				< 10	202049535	0.133	RCV000526781.5; RCV000437168.1; RCV001099941.1
1	6535135	6535135	p36.31	C	T	SNV	Exonic	PLEKHG5	NM_020631.6; NM_001265592.2; NM_001042664.1; ENST00000377728.8; ENST00000377740.5; ENST00000675123.1; NM_001042665.1; NM_001265594.2; ENST00000400915.8; ENST00000377748.6; ENST00000535355.6; ENST00000537245.6; ENST00000673471.2; ENST00000377732.5; NM_198681.4; ENST00000377725.5; NM_001265593.1; NM_001042663.3; ENST00000675694.1	c.274G>A; c.571G>A; c.385G>A; c.481G>A; c.448G>A	p.V129I; p.V191I; p.V92I; p.V150I; p.V161I	missense	Uncertain Significance	Damaging	0.02		18.85	371516662	0.006	RCV000236807.1; RCV000645436.5
1	6614324	6614324	p36.31	G	A	SNV	Promoter; Exonic	NOL9; TAS1R1	NM_138697.4; ENST00000333172.11; ENST00000377705.6; ENST00000351136.7; NM_177540.3; NM_024654.5	c.239C>T; c.-1110G>A	p.T80I	missense	Uncertain Significance			Benign	11.25	79736441	0.386
1	6637055	6637055	p36.31	C	G	SNV	Exonic	TAS1R1	NM_138697.4; ENST00000333172.11; ENST00000351136.7; NM_177540.3	c.757C>G; c.1519C>G	p.R253G; p.R507G	missense	Uncertain Significance	Damaging	0	Benign	23	61740593	0.098
1	6649035	6649035	p36.31	G	A	SNV	Exonic	ZBTB48	NM_005341.4; NM_001278647.2; NM_001278648.2; ENST00000377674.9	c.1830G>A	p.Q610Q	synonymous	Uncertain Significance				11.92	137878570	0.088
1	6653500	6653500	p36.31	G	A	SNV	Exonic; 3'UTR	KLHL21	ENST00000377658.8; ENST00000377663.3; NM_014851.4; NM_001324309.2; ENST00000610898.1	c.33C>T; c.*668C>T; c.*1925C>T; c.1719C>T	p.F573F; p.F11F	synonymous	Uncertain Significance				< 10	137992292	0.005
1	6659454	6659454	p36.31	A	G	SNV	Exonic; Intronic	KLHL21	ENST00000377658.8; ENST00000377663.3; NM_014851.4; NM_001324309.2; ENST00000610898.1	c.1080T>C; c.-1447+4060T>C	p.N360N	synonymous	Likely Benign				< 10	111512176	0.217
1	6680252	6680252	p36.31	G	A	SNV	Exonic	PHF13	NM_153812.3; ENST00000377648.5	c.531G>A	p.S177S	synonymous	Likely Benign				< 10	116799550	0.255	RCV000888611.2
1	6693072	6693072	p36.31	C	T	SNV	Exonic; Intronic	THAP3	ENST00000377627.7; ENST00000307896.10; NM_138350.3; NM_001195753.2; NM_001195752.1; ENST00000054650.8	c.459+517C>T; c.652C>T; c.655C>T	p.R218C; p.R219C	missense	Uncertain Significance	Damaging	0		23.6	142247203	0.225
1	7723852	7723852	p36.23	C	T	SNV	Exonic	CAMTA1	NM_001349609.2; NM_001349612.2; ENST00000303635.12; NM_015215.4; NM_001349610.2; NM_001349608.2	c.1155C>T; c.1245C>T	p.T415T; p.T385T	synonymous	Likely Benign				< 10	140217230	0.195	RCV000970933.2
1	7869968	7869968	p36.23	G	A	SNV	Exonic	PER3	ENST00000614998.4; NM_001289863.3; NM_001289864.3; ENST00000377532.7; NM_001377276.1; NM_001289862.2; ENST00000361923.2; NM_016831.4; NM_001377275.1; NM_001289861.2	c.301G>A; c.1255G>A; c.1258G>A	p.V419M; p.V101M; p.V420M	missense	Likely Benign	Tolerated	0.09	Benign	< 10	35426314	0.263	RCV000965536.2
1	7887234	7887234	p36.23	C	T	SNV	Exonic	PER3	ENST00000614998.4; NM_001289863.3; NM_001289864.3; ENST00000377532.7; NM_001377276.1; NM_001289862.2; ENST00000361923.2; NM_016831.4; NM_001377275.1; NM_001289861.2	c.2245C>T; c.2221C>T; c.2224C>T; c.1288C>T	p.R742W; p.R741W; p.R749W; p.R430W	missense	Likely Benign	Damaging	0.05	Benign	17.21	35687686	0.199	RCV000961858.2
1	7907931	7907931	p36.23	G	T	SNV	Exonic	UTS2	NM_006786.4; ENST00000054668.5; ENST00000361696.10; NM_021995.2	c.270C>A; c.315C>A	p.F105L; p.F90L	missense	Uncertain Significance	Tolerated	1	Benign	11.92	141021422	0.043	RCV000969396.1
1	8029482	8029482	p36.23	A	G	SNV	Intronic	PARK7	NM_007262.5; ENST00000338639.10; ENST00000377493.9; ENST00000493678.5; NM_001123377.2	c.252+18A>G; c.193-1472A>G			Uncertain Significance				< 10	147308281	0.082
1	8073943	8073943	p36.23	G	A	SNV	Exonic; 3'UTR	ERRFI1	ENST00000467067.1; ENST00000377482.10; NM_018948.4	c.716C>T; c.*1387C>T	p.P239L	missense	Likely Benign	Tolerated	0.3	Benign	14.2	116791613	0.148	RCV000882491.1
1	8384566	8384566	p36.23	C	T	SNV	Exonic; Intronic	SLC45A1	ENST00000289877.8; NM_001379617.1; NM_001379616.1; NM_001379615.1; NM_001080397.3; NM_001379618.1; NM_001379614.1	c.177C>T; c.-116-1312C>T	p.S59S	synonymous	Uncertain Significance				< 10	112041749	0.02
1	8395521	8395521	p36.23	G	A	SNV	Exonic	SLC45A1	ENST00000289877.8; NM_001379617.1; NM_001379616.1; NM_001379615.1; NM_001379618.1; NM_001080397.3; NM_001379614.1	c.862G>A; c.1375G>A; c.1468G>A	p.V459M; p.V490M; p.V288M	missense	Uncertain Significance			Benign	17.87	138528401	0.015
1	8404034	8404034	p36.23	T	G	SNV	Exonic	SLC45A1	ENST00000289877.8; NM_001379617.1; NM_001379616.1; NM_001379615.1; NM_001379618.1; NM_001080397.3; NM_001379614.1	c.2115T>G; c.1602T>G; c.2139T>G; c.2232T>G; c.2208T>G; c.1626T>G	p.A534A; p.A744A; p.A736A; p.A542A; p.A713A; p.A705A	synonymous	Likely Benign				< 10	776071189	0.008	RCV001311618.1
1	8419868	8419869	p36.23		CTCCTT	Insertion	Exonic	RERE	ENST00000337907.7; NM_001042682.2; ENST00000476556.5; ENST00000400908.7; NM_012102.4; NM_001042681.2	c.3568_3573dupAAGGAG; c.1906_1911dupAAGGAG	p.K1190_E1191dup; p.K636_E637dup	in-frame	Likely Benign				17.91		0.487	RCV000958417.2
1	8421143	8421143	p36.23	G	T	SNV	Exonic	RERE	ENST00000337907.7; NM_001042682.2; ENST00000476556.5; ENST00000400908.7; NM_012102.4; NM_001042681.2	c.762C>A; c.2424C>A	p.P808P; p.P254P	synonymous	Likely Benign				< 10	199944381	0.257
1	8716142	8716142	p36.23	G	A	SNV	Exonic	RERE	ENST00000337907.7; ENST00000400908.7; ENST00000659924.1; NM_012102.4; NM_001042681.2	c.215C>T	p.T72M	missense	Uncertain Significance			Benign	22.9	116282153	0.02	RCV000966725.1
1	8926485	8926485	p36.23	C	T	SNV	Exonic	ENO1	ENST00000647408.1; ENST00000234590.10; NM_001353346.3; NM_001201483.4; NM_001428.5	c.520G>A; c.241G>A	p.G81S; p.G174S	missense	Uncertain Significance	Damaging	0.01	Possibly Damaging	25	371371408	0.005
1	9030950	9030950	p36.23	C	T	SNV	Exonic	CA6	NM_001270501.2; NM_001270500.2; NM_001270502.2; ENST00000377443.7; ENST00000377442.3; ENST00000377436.6; NM_001215.4	c.370C>T; c.574C>T; c.754C>T	p.L124L; p.L252L; p.L192L	synonymous	Likely Benign				< 10	112457444	0.014
1	9067417	9067417	p36.23	C	T	SNV	Exonic	SLC2A7	NM_207420.3; ENST00000400906.1	c.1144G>A	p.G382S	missense	Uncertain Significance	Activating	1	Benign	12.04	74767526	0.299
1	9074729	9074729	p36.23	G	A	SNV	Intronic	SLC2A7	NM_207420.3; ENST00000400906.1	c.903+11C>T			Uncertain Significance				< 10	201194130	0.01
1	9075188	9075188	p36.23	T	C	SNV	Exonic	SLC2A7	NM_207420.3; ENST00000400906.1	c.703A>G	p.T235A	missense	Likely Benign	Tolerated	1	Benign	< 10	113582754	0.098
1	9097834	9097834	p36.23	C	T	SNV	Exonic	SLC2A5	NM_001328619.2; ENST00000377424.9; NM_001328621.2; NM_003039.3; NM_001328620.2	c.1185G>A; c.1317G>A; c.876G>A	p.P439P; p.P292P; p.P395P	synonymous	Uncertain Significance				< 10	775472970	0.002						4727071	0.25
1	9098568	9098568	p36.23	G	T	SNV	Intronic	SLC2A5	NM_001328619.2; ENST00000377424.9; NM_001328621.2; NM_003039.3; NM_001328620.2	c.1099-3C>A; c.967-3C>A; c.658-3C>A			Uncertain Significance				19.35	191194369	0.096
1	9305179	9305179	p36.22	C	T	SNV	Exonic	H6PD	ENST00000377403.7; ENST00000602477.1; NM_001282587.2; NM_004285.4	c.219C>T; c.186C>T	p.F62F; p.F73F	synonymous	Likely Benign				10.76	116196265	0.25	RCV000957774.1
1	9307076	9307076	p36.22	G	A	SNV	Exonic	H6PD	ENST00000377403.7; ENST00000602477.1; NM_001282587.2; NM_004285.4	c.712G>A; c.679G>A	p.G227S; p.G238S	missense	Likely Benign	Tolerated	0.51	Benign	< 10	142080875	0.251	RCV000957775.1
1	9324002	9324002	p36.22	A	G	SNV	Exonic	H6PD	ENST00000377403.7; ENST00000602477.1; NM_001282587.2; NM_004285.4	c.1450A>G; c.1483A>G	p.N484D; p.N495D	missense	Likely Benign	Tolerated	0.66	Benign	15.65	35404275	0.258	RCV000966727.2
1	9324132	9324132	p36.22	C	T	SNV	Exonic	H6PD	ENST00000377403.7; ENST00000602477.1; NM_001282587.2; NM_004285.4	c.1580C>T; c.1613C>T	p.P527L; p.P538L	missense	Uncertain Significance	Tolerated	0.47	Benign	< 10	752666710	0.004						9241111	1.89
1	9324277	9324277	p36.22	T	C	SNV	Exonic	H6PD	ENST00000377403.7; ENST00000602477.1; NM_001282587.2; NM_004285.4	c.1725T>C; c.1758T>C	p.A575A; p.A586A	synonymous	Likely Benign				< 10	116493689	0.109	RCV000972361.1
1	9427487	9427487	p36.22	C	T	SNV	Intronic	SPSB1	ENST00000328089.11; NM_025106.4; ENST00000377399.2	c.695-20C>T			Likely Benign				< 10	201185309	0.112
1	9627426	9627426	p36.22	A	T	SNV	Intronic	SLC25A33	ENST00000302692.7; NM_032315.3	c.314+7A>T			Uncertain Significance				< 10	181146587	0.076
1	9640186	9640186	p36.22	A	G	SNV	Exonic	SLC25A33	ENST00000302692.7; NM_032315.3	c.657A>G	p.L219L	synonymous	Likely Benign				< 10	766207217	0.001
1	9833379	9833379	p36.22	G	A	SNV	Exonic	CLSTN1	ENST00000361311.4; NM_001302883.1; ENST00000377298.9; NM_014944.4; NM_001009566.3	c.165C>T	p.L55L	synonymous	Uncertain Significance				< 10	139189920	0.014
1	9910773	9910773	p36.22	C	A	SNV	3'UTR	CTNNBIP1	NM_020248.3; ENST00000400904.7; NM_001012329.2; ENST00000377263.6	c.*3G>T			Uncertain Significance				11.8	113027301	0.137
1	9931312	9931312	p36.22	G	A	SNV	Exonic	CTNNBIP1	NM_020248.3; ENST00000400904.7; NM_001012329.2; ENST00000377263.6	c.120C>T	p.F40F	synonymous	Uncertain Significance				11.71	12062756	0.299
1	10002756	10002756	p36.22	C	T	SNV	Promoter; Exonic; 5'UTR	NMNAT1; LZIC	NM_001316973.2; ENST00000377223.6; NM_001316976.2; NM_032368.5; ENST00000400903.6; ENST00000403197.5; NM_001316975.2; NM_022787.4; NM_001297778.1; ENST00000377213.1; ENST00000377205.6; NM_001297779.2; NM_001316974.2	c.-874C>T; c.-384C>T; c.-83G>A; c.38G>A	p.G13E	missense	Uncertain Significance				12.04
1	10399812	10399812	p36.22	A	T	SNV	Intronic	KIF1B	ENST00000622724.3; ENST00000377081.5; ENST00000377086.5; ENST00000620295.2; NM_001365952.1; NM_015074.3; NM_001365951.3; ENST00000263934.10; ENST00000676179.1	c.3285-15A>T; c.3423-15A>T; c.3345-15A>T; c.3381-15A>T			Likely Benign				< 10	200470260	0.05	RCV001173611.1; RCV000305426.2	187869
1	10473238	10473238	p36.22	G	A	SNV	Exonic	PGD	NM_001304451.2; ENST00000270776.13; NM_001304452.2; NM_002631.4	c.774G>A; c.735G>A; c.708G>A	p.A245A; p.A236A; p.A258A	synonymous	Uncertain Significance				< 10	61736950	0.236
1	10494000	10494000	p36.22	G	A	SNV	Exonic; Intronic; ncRNA	CENPS-CORT; CENPS	NM_199006.3; ENST00000309048.8; NR_037187.2; NM_198544.4; NM_001243768.2; NM_199294.3; NM_001270517.2; ENST00000400900.6; ENST00000470413.6; NR_036462.2	c.153G>A; n.652+2542G>A; c.113-714G>A; n.754G>A	p.S51S	synonymous	Uncertain Significance				12.47	140669507	0.012
1	10521569	10521569	p36.22	C	T	SNV	Exonic; 3'UTR	DFFA	NM_213566.2; ENST00000377038.8; NM_004401.3	c.*1522G>A; c.974G>A	p.R325Q	missense	Likely Benign			Benign	11.86	140269107	0.261	RCV000968817.1
1	10523626	10523626	p36.22	A	G	SNV	Exonic	DFFA	ENST00000377036.2; NM_213566.2; ENST00000377038.8; NM_004401.3	c.493T>C	p.C165R	missense	Likely Benign	Tolerated	0.45	Benign	< 10	78046004	0.373	RCV000958418.1
1	10659392	10659392	p36.22	C	G	SNV	Exonic	PEX14	NM_004565.3; ENST00000356607.9	c.267C>G	p.V89V	synonymous	Likely Benign				< 10	146359055	0.031	RCV001081866.2; RCV000081149.7
1	10689783	10689783	p36.22	C	T	SNV	Exonic	PEX14	NM_004565.3; ENST00000356607.9	c.873C>T	p.H291H	synonymous	Likely Benign				< 10	115117459	0.177	RCV000887736.3; RCV000249685.1
1	10709411	10709411	p36.22	G	C	SNV	Exonic	CASZ1	NM_017766.5; NM_001079843.3; ENST00000377022.8; ENST00000344008.5	c.2964C>G	p.P988P	synonymous	Likely Benign				10.82	150861465	0.128	RCV000905489.2
1	10710791	10710791	p36.22	T	C	SNV	Exonic	CASZ1	NM_001079843.3; NM_017766.5; ENST00000377022.8; ENST00000344008.5	c.2838A>G	p.A946A	synonymous	Uncertain Significance				17.29	145056756	0.051
1	10718555	10718555	p36.22	A	G	SNV	Intronic	CASZ1	NM_017766.5; NM_001079843.3; ENST00000377022.8; ENST00000344008.5	c.1409+10T>C			Likely Benign				18.66	147686084	0.213	RCV000893535.1
1	10719934	10719934	p36.22	C	G	SNV	Exonic	CASZ1	NM_001079843.3; NM_017766.5; ENST00000377022.8; ENST00000344008.5	c.1165G>C	p.V389L	missense	Uncertain Significance			Benign	16.74	145422074	0.052
1	10720454	10720454	p36.22	C	T	SNV	Exonic	CASZ1	NM_001079843.3; NM_017766.5; ENST00000377022.8; ENST00000344008.5	c.645G>A	p.P215P	synonymous	Likely Benign				< 10	149880030	0.13	RCV000905490.2
1	11080617	11080617	p36.22	A	G	SNV	Exonic	TARDBP	ENST00000649624.1; NM_007375.4; ENST00000240185.8	c.675A>G	p.P225P	synonymous	Likely Benign				< 10	61741294	0.205	RCV000873994.2; RCV000338255.2; RCV001545890.1
1	11090287	11090287	p36.22	C	T	SNV	Exonic	MASP2	NM_006610.4; ENST00000400897.8	c.1243G>A	p.D415N	missense	Likely Benign	Tolerated	0.18	Benign	24.2	61735593	0.196	RCV000375543.1; RCV000964365.1
1	11106642	11106642	p36.22	G	A	SNV	Exonic	MASP2	NM_006610.4; ENST00000400897.8; ENST00000400898.3; NM_139208.3	c.383C>T	p.T128M	missense	Uncertain Significance	Damaging	0.01	Probably Damaging	24.1	141145402	0.071	RCV000394917.2
1	11119842	11119842	p36.22	G	A	SNV	Exonic	SRM	ENST00000376957.7; NM_003132.3	c.159C>T	p.V53V	synonymous	Uncertain Significance				10.78	376503264	0.104
1	11128712	11128712	p36.22	G	A	SNV	Exonic	EXOSC10	ENST00000376936.9; NM_001001998.3; ENST00000304457.11; NM_002685.4	c.2540C>T; c.2465C>T	p.P822L; p.P847L	missense	Uncertain Significance	Tolerated	0.69	Benign	< 10	147762859	0.015
1	11130975	11130975	p36.22	G	A	SNV	Exonic	EXOSC10	ENST00000376936.9; NM_001001998.3; ENST00000304457.11; NM_002685.4	c.2223C>T; c.2298C>T	p.S741S; p.S766S	synonymous	Likely Benign				< 10	114666698	0.134
1	11140611	11140611	p36.22	A		Deletion	Intronic	EXOSC10	ENST00000376936.9; NM_001001998.3; ENST00000304457.11; NM_002685.4	c.1587-5delT			Uncertain Significance				6.87		0.16						3730642	12.5
1	11140619	11140632	p36.22	AAACACACACACAC		Deletion	Intronic	EXOSC10	ENST00000376936.9; NM_001001998.3; ENST00000304457.11; NM_002685.4	c.1587-26_1587-13delGTGTGTGTGTGTTT			Uncertain Significance				2.657	879018245
1	11140620	11140620	p36.22	A	C	SNV	Intronic	EXOSC10	ENST00000376936.9; NM_001001998.3; ENST00000304457.11; NM_002685.4	c.1587-14T>G			Uncertain Significance				< 10	1194754
1	11147598	11147598	p36.22	A	G	SNV	Exonic	EXOSC10	ENST00000376936.9; NM_001001998.3; ENST00000304457.11; NM_002685.4	c.996T>C	p.S332S	synonymous	Uncertain Significance				11.4	143818053	0.265
1	11147900	11147900	p36.22	T	C	SNV	Exonic	EXOSC10	ENST00000376936.9; NM_001001998.3; ENST00000304457.11; NM_002685.4	c.902A>G	p.N301S	missense	Uncertain Significance	Damaging	0.04	Benign	17.95	143526730	0.014
1	11147941	11147941	p36.22	T	C	SNV	Exonic	EXOSC10	ENST00000376936.9; NM_001001998.3; ENST00000304457.11; NM_002685.4	c.861A>G	p.P287P	synonymous	Uncertain Significance				< 10	144089648	0.014
1	11151196	11151196	p36.22	C	T	SNV	Exonic	EXOSC10	ENST00000376936.9; NM_001001998.3; ENST00000304457.11; NM_002685.4	c.518G>A	p.R173Q	missense	Uncertain Significance	Damaging	0.05	Benign	25.2	567506950	0.002
1	11167541	11167541	p36.22	G	C	SNV	3'UTR	MTOR	ENST00000361445.9; NM_004958.4; NM_001386501.1; NM_001386500.1; ENST00000376838.5	c.*1C>G			Uncertain Significance				14.74	143041125	0.257
1	11292535	11292535	p36.22	G	A	SNV	Exonic	MTOR	ENST00000361445.9; NM_004958.4; NM_001386501.1; NM_001386500.1	c.2472C>T; c.1224C>T	p.I824I; p.I408I	synonymous	Uncertain Significance				11.9	138875882	0.014	RCV000862549.3
1	11333939	11333939	p36.22	T	C	SNV	Exonic	UBIAD1	ENST00000376804.2; ENST00000376810.6; NM_013319.3; NM_001330349.2; NM_001330350.2	c.351T>C	p.D117D	synonymous	Uncertain Significance				13.57	35990325	0.063
1	11561489	11561489	p36.22	C	T	SNV	Exonic	DISP3	ENST00000294484.7; NM_020780.2	c.440C>T	p.T147M	missense	Uncertain Significance			Possibly Damaging	26.3	61736678	0.261
1	11589872	11589872	p36.22	C	T	SNV	Exonic	DISP3	ENST00000294484.7; NM_020780.2	c.2958C>T	p.F986F	synonymous	Likely Benign				< 10	77546140	0.203
1	11589970	11589970	p36.22	G	A	SNV	Exonic	DISP3	ENST00000294484.7; NM_020780.2	c.3056G>A	p.G1019D	missense	Uncertain Significance			Probably Damaging	24.7
1	11591674	11591674	p36.22	G	A	SNV	Exonic	DISP3	ENST00000294484.7; NM_020780.2	c.3282G>A	p.L1094L	synonymous	Likely Benign				< 10	141767050	0.159
1	11728793	11728793	p36.22	G	T	SNV	Exonic	FBXO6	NM_018438.6; ENST00000376753.9	c.78G>T	p.T26T	synonymous	Likely Benign				< 10	144734810	0.076
1	11733379	11733379	p36.22	G	A	SNV	Exonic	FBXO6	NM_018438.6; ENST00000376753.9	c.555G>A	p.V185V	synonymous	Likely Benign				< 10	150995826	0.095
1	11775224	11775224	p36.22	G	A	SNV	Exonic	DRAXIN	NM_198545.4; ENST00000294485.6	c.896G>A	p.G299D	missense	Uncertain Significance	Damaging	0	Probably Damaging	27	151284265	0.058
1	11775244	11775244	p36.22	G	A	SNV	Exonic	DRAXIN	NM_198545.4; ENST00000294485.6	c.916G>A	p.D306N	missense	Uncertain Significance	Damaging	0	Probably Damaging	29.2	758732580	0.004						8220350	0.22
1	11806234	11806234	p36.22	C	G	SNV	Exonic; Intronic	AGTRAP	NM_001040196.2; ENST00000376629.8; ENST00000376637.7; NM_001040197.2; NM_020350.5; ENST00000452018.6; NM_001040194.2; ENST00000314340.10; NM_001040195.2; ENST00000400895.6	c.62+340C>G; c.28-1263C>G; c.113C>G	p.T38S	missense	Likely Benign			Benign	< 10	143389939	0.161
1	11836553	11836553	p36.22	G	T	SNV	Exonic	C1orf167	NM_001010881.2	c.2197G>T	p.A733S	missense	Uncertain Significance				13.54	75902420	0.2
1	11854018	11854018	p36.22	C	T	SNV	Exonic	MTHFR	ENST00000376592.6; NM_001330358.2; ENST00000376590.9; ENST00000423400.7; ENST00000641407.1; ENST00000641820.1; NM_005957.5	c.741G>A; c.1596G>A; c.1476G>A; c.1599G>A	p.P247P; p.P533P; p.P492P; p.P532P	synonymous	Likely Benign				< 10	35653697	0.3	RCV001273147.1; RCV000642250.4	242818
1	11854476	11854476	p36.22	T	G	SNV	Exonic	MTHFR	ENST00000376592.6; NM_001330358.2; ENST00000376590.9; ENST00000423400.7; ENST00000641407.1; ENST00000641820.1; NM_005957.5	c.1406A>C; c.1286A>C; c.551A>C; c.1409A>C	p.E429A; p.E469A; p.E470A; p.E184A	missense	Benign	Tolerated	0.23	Benign	22.1	1801131	28.583	RCV001273149.1; RCV000144922.1; RCV000153515.7; RCV000430863.6; RCV000003699.4; RCV001197542.3; RCV001283666.1; RCV000350590.3; RCV000003698.4	189424	607093	181500	GV000000367
1	11854498	11854498	p36.22	C	T	SNV	Exonic	MTHFR	ENST00000376592.6; NM_001330358.2; ENST00000376590.9; ENST00000423400.7; ENST00000641407.1; ENST00000641820.1; NM_005957.5	c.1264G>A; c.1387G>A; c.1384G>A; c.529G>A	p.G462R; p.G177R; p.G463R; p.G422R	missense	Uncertain Significance	Damaging	0.01	Probably Damaging	28.1	45571736	0.092	RCV001274682.1; RCV000863796.3
1	11856378	11856378	p36.22	G	A	SNV	Exonic; 5'UTR	MTHFR	ENST00000376592.6; NM_001330358.2; ENST00000376590.9; ENST00000423400.7; ENST00000641407.1; ENST00000641820.1; NM_005957.5	c.788C>T; c.785C>T; c.665C>T; c.-71C>T	p.A222V; p.A263V; p.A262V	missense	Uncertain Significance	Damaging	0.05	Probably Damaging	25.6	1801133	30.848	RCV001276670.1; RCV000144921.1; RCV001283662.1; RCV000003697.7; RCV000427078.1; RCV000761447.1; RCV000417131.1; RCV000428048.4; RCV000153516.6; RCV001030751.4; RCV000211336.1; RCV000259890.3; RCV000211133.1	189430			GV000551210
1	11863084	11863084	p36.22	C	T	SNV	Exonic	MTHFR	ENST00000376592.6; NM_001330358.2; ENST00000376590.9; ENST00000423400.7; ENST00000641407.1; NM_005957.5	c.90G>A; c.213G>A; c.210G>A	p.S70S; p.S71S; p.S30S	synonymous	Uncertain Significance				< 10	765167328	0.002	RCV000864165.3; RCV001276673.1
1	11907368	11907368	p36.22	G	A	SNV	Intronic; Exonic	NPPA-AS1; NPPA	ENST00000376480.7; NR_037806.1; NM_006172.4	c.252C>T; n.1480-123G>A	p.T84T	synonymous	Likely Benign				< 10	755212754	0.002	RCV000230212.4
1	11918794	11918794	p36.22	C	G	SNV	Exonic	NPPB	NM_002521.3; ENST00000376468.4	c.97G>C	p.G33R	missense	Uncertain Significance	Tolerated	0.13	Benign	< 10	151222918	0.019
1	11983352	11983352	p36.22	C	T	SNV	Exonic	KIAA2013	ENST00000376576.3; ENST00000376572.8; NM_138346.3	c.1228G>A	p.E410K	missense	Uncertain Significance			Possibly Damaging	23.7	145773140	0.195
1	12008093	12008093	p36.22	G	A	SNV	Exonic	PLOD1	ENST00000196061.5; NM_000302.4; NM_001316320.2	c.278G>A; c.137G>A	p.R46H; p.R93H	missense	Uncertain Significance	Damaging	0.01	Possibly Damaging	25.7	142710681	0.025	RCV000507063.4; RCV001081382.3
1	12012768	12012768	p36.22	G	T	SNV	Exonic	PLOD1	ENST00000196061.5; NM_000302.4; NM_001316320.2	c.555G>T; c.696G>T	p.K185N; p.K232N	missense	Uncertain Significance	Tolerated	0.16	Benign	22.6	142978362	0.279	RCV000488399.9; RCV000442453.4; RCV000999754.4; RCV000249131.1
1	12014965	12014965	p36.22	C	T	SNV	Intronic	PLOD1	ENST00000196061.5; NM_000302.4; NM_001316320.2	c.643+15C>T; c.784+15C>T			Uncertain Significance				< 10	376661744	0.004	RCV000420345.1
1	12023632	12023632	p36.22	G	A	SNV	Exonic	PLOD1	ENST00000196061.5; NM_000302.4; NM_001316320.2	c.1141G>A; c.1282G>A	p.V381M; p.V428M	missense	Likely Benign	Tolerated	0.15	Benign	< 10	2230896	0.224	RCV000344429.7; RCV000252104.1; RCV000614003.1
1	12023655	12023655	p36.22	C	T	SNV	Exonic	PLOD1	ENST00000196061.5; NM_000302.4; NM_001316320.2	c.1164C>T; c.1305C>T	p.T435T; p.T388T	synonymous	Likely Benign				< 10	74949176	0.065	RCV000545561.5; RCV000424359.1; RCV000620300.1; RCV001579478.1
1	12061630	12061630	p36.22	G	A	SNV	Intronic	MFN2	ENST00000674817.1; ENST00000675053.1; ENST00000675298.1; ENST00000444836.5; ENST00000674548.1; ENST00000674658.1; ENST00000675113.1; ENST00000235329.10; ENST00000674910.1; ENST00000675817.1; NM_014874.4; ENST00000676293.1; ENST00000675919.1; NM_001127660.2; ENST00000675231.1	c.625+19G>A; c.970+19G>A			Likely Benign				< 10	75865135	0.227	RCV000199566.1; RCV001173015.1; RCV001523466.1	1778239
1	12082244	12082244	p36.22	C	T	SNV	Exonic	MIIP	NM_021933.4; ENST00000235332.6	c.207C>T	p.G69G	synonymous	Likely Benign				< 10	35204268	0.149
1	12089267	12089267	p36.22	C	T	SNV	Intronic; microRNA	MIR6729; MIIP	NM_021933.4; ENST00000235332.6; NR_106787.1	n.53C>T; c.657-13C>T			Uncertain Significance				< 10	755870926	0.001
1	12091851	12091851	p36.22	C	T	SNV	Exonic	MIIP	NM_021933.4; ENST00000235332.6	c.1153C>T	p.R385W	missense	Likely Benign	Tolerated	0.06	Benign	< 10	150645291	0.108	RCV000906555.2
1	12164451	12164451	p36.22	A	G	SNV	5'UTR; Exonic	TNFRSF8	ENST00000263932.7; ENST00000417814.3; NM_001243.5; NM_001281430.3	c.284A>G; c.-50A>G	p.K95R	missense	Uncertain Significance	Tolerated	0.14	Probably Damaging	25	72861979	0.148
1	12195661	12195661	p36.22	G	A	SNV	Exonic; 5'UTR	TNFRSF8	ENST00000263932.7; ENST00000413146.6; ENST00000417814.3; NM_001243.5; NM_001281430.3	c.993G>A; c.-64G>A; c.1326G>A	p.R442R; p.R331R	synonymous	Likely Benign				< 10	11569933	0.236	RCV000880968.1
1	12252927	12252927	p36.22	G	A	SNV	Exonic	TNFRSF1B	NM_001066.3; ENST00000376259.7	c.559G>A	p.V187M	missense	Likely Benign	Tolerated	0.1	Benign	< 10	2228494	0.287	RCV000909957.2
1	12309363	12309363	p36.22	G	C	SNV	Exonic	VPS13D	ENST00000613099.4; ENST00000620676.6; NM_015378.4; NM_018156.4	c.531G>C	p.K177N	missense	Likely Benign			Benign	23.6	72864967	0.132	RCV000972362.2
1	12337605	12337605	p36.22	C	T	SNV	Exonic	VPS13D	ENST00000613099.4; ENST00000620676.6; NM_015378.4; NM_018156.4	c.3960C>T	p.S1320S	synonymous	Likely Benign				< 10	77854026	0.061	RCV000912416.2
1	12393345	12393345	p36.22	C	T	SNV	Exonic	VPS13D	ENST00000613099.4; ENST00000620676.6; NM_015378.4; NM_018156.4	c.8350C>T	p.R2784C	missense	Uncertain Significance			Benign	32	200761533	0.003
1	12403045	12403045	p36.22	G	A	SNV	Exonic	VPS13D	ENST00000613099.4; ENST00000620676.6; NM_015378.4; NM_018156.4	c.8747G>A; c.8822G>A	p.R2916Q; p.R2941Q	missense	Uncertain Significance			Benign	23.4	752529540	0.007						272060	0.27
1	12446332	12446332	p36.22	A	G	SNV	Exonic	VPS13D	ENST00000613099.4; ENST00000620676.6; NM_015378.4; NM_018156.4	c.11498A>G; c.11573A>G	p.N3858S; p.N3833S	missense	Uncertain Significance			Benign	13.46	147406088	0.036	RCV000912417.2
1	12460322	12460322	p36.22	G	A	SNV	Exonic	VPS13D	ENST00000613099.4; ENST00000620676.6; NM_015378.4; NM_018156.4	c.11644G>A; c.11719G>A	p.G3882S; p.G3907S	missense	Uncertain Significance			Benign	22.5	141581482	0.01
1	12779547	12779547	p36.21	C	T	SNV	Intronic; Exonic	AADACL3	NR_111984.2; NM_001103170.3	n.236-1338C>T; c.239C>T	p.P80L	missense	Likely Benign	Tolerated	0.49		< 10	142242506	0.116
1	12779654	12779654	p36.21	G	A	SNV	Intronic; Exonic	AADACL3	NR_111984.2; NM_001103170.3	c.346G>A; n.236-1231G>A	p.V116M	missense	Uncertain Significance	Tolerated	0.12		11.33	149484219	0.03
1	12780956	12780956	p36.21	A	G	SNV	Intronic	AADACL3	NR_111984.2; NM_001103170.3	n.299+8A>G; c.449+8A>G			Uncertain Significance				< 10	199614160	0.011
1	12785451	12785451	p36.21	A	G	SNV	ncRNA; Exonic	AADACL3	NR_111984.2; NM_001103170.3	n.562A>G; c.712A>G	p.R238G	missense	Uncertain Significance	Damaging	0.03		20.4	140430572	0.05
1	12785546	12785546	p36.21	A	T	SNV	ncRNA; Exonic	AADACL3	NR_111984.2; NM_001103170.3	n.657A>T; c.807A>T	p.K269N	missense	Uncertain Significance	Tolerated	0.51		< 10	761724053	0.001
1	12815646	12815646	p36.21	C	G	SNV	Intronic	C1orf158	ENST00000614859.5; NM_152290.4; NM_001330361.2	c.112-4C>G; c.112-3597C>G			Likely Benign				< 10	115530775	0.167
1	12835866	12835866	p36.21	G	A	SNV	Exonic	PRAMEF12	ENST00000357726.5; NM_001080830.5	c.468G>A	p.G156G	synonymous	Likely Benign				< 10	143218621	0.051
1	12854266	12854266	p36.21	C	G	SNV	Promoter; Exonic	PRAMEF1	NM_001294139.1; ENST00000332296.7; NM_023013.4	c.490C>G; c.-722C>G	p.L164V	missense	Uncertain Significance	Damaging	0.02	Probably Damaging	13.39	764346241	0.001
1	12855691	12855691	p36.21	A	T	SNV	Exonic	PRAMEF1	NM_001294139.1; ENST00000332296.7; NM_023013.4	c.236A>T; c.971A>T	p.H79L; p.H324L	missense	Likely Benign	Tolerated	0.29	Benign	< 10	143186065	0.185
1	12884987	12884987	p36.21	G	A	SNV	Promoter; Exonic	LINC01784; PRAMEF11	NR_146629.1; NM_001146344.3	c.1250C>T; n.-1901C>T	p.A417V	missense	Likely Benign	Tolerated	0.19		< 10	146964579	0.094
1	12888427	12888427	p36.21	G	A	SNV	Exonic	PRAMEF11	NM_001146344.3	c.223C>T	p.P75S	missense	Likely Benign	Tolerated	0.07		< 10	57441393	0.274
1	12888546	12888546	p36.21	G	A	SNV	Exonic	PRAMEF11	NM_001146344.3	c.104C>T	p.T35M	missense	Likely Benign	Tolerated	0.15		< 10	61664550	0.11
1	12908005	12908005	p36.21	G	A	SNV	Exonic	HNRNPCL1	ENST00000317869.7; NM_001013631.3	c.138C>T	p.C46C	synonymous	Uncertain Significance				< 10	141516126	0.086
1	12919683	12919683	p36.21	G	A	SNV	Exonic	PRAMEF2	ENST00000240189.2; NM_023014.1	c.423G>A	p.T141T	synonymous	Uncertain Significance				< 10	117109939	0.148
1	12921196	12921196	p36.21	C	T	SNV	Exonic	PRAMEF2	ENST00000240189.2; NM_023014.1	c.987C>T	p.Y329Y	synonymous	Likely Benign				< 10	146902655	0.189
1	12921405	12921405	p36.21	G	A	SNV	Exonic	PRAMEF2	ENST00000240189.2; NM_023014.1	c.1196G>A	p.R399H	missense	Uncertain Significance	Tolerated	0.23	Benign	< 10	143742734	0.004
1	12954476	12954476	p36.21	G	C	SNV	Exonic	PRAMEF10	NM_001039361.4; ENST00000235347.4	c.807C>G; c.737G>C *	p.S246T; p.P269P	missense; synonymous	Likely Benign				< 10	371069762	0.401
1	12954477	12954477	p36.21	G	A	SNV	Exonic	PRAMEF10	NM_001039361.4; ENST00000235347.4	c.806C>T; c.736A>C *	p.P269L; p.S246R	missense	Likely Benign	Activating	1	Benign	< 10	375691655	0.168
1	12954560	12954560	p36.21	G	A	SNV	Exonic	PRAMEF10	NM_001039361.4; ENST00000235347.4	c.723C>T; c.653C>T	p.F241F; p.S218L	missense; synonymous	Likely Benign				< 10	201341344	0.211
1	13183434	13183434	p36.21	G	A	SNV	Exonic	HNRNPCL2	NM_001136561.3; ENST00000621994.3	c.439C>T	p.R147C	missense	Uncertain Significance	Damaging	0.02	Benign	< 10	373281747	0.043
1	13183466	13183466	p36.21	A	G	SNV	Exonic	HNRNPCL2	NM_001136561.3; ENST00000621994.3	c.407T>C	p.I136T	missense	Likely Benign	Damaging	0.04	Benign	< 10	377512348	0.122
1	13448279	13448279	p36.21	C	T	SNV	Exonic	PRAMEF13	NM_001291380.1	c.1196G>A	p.R399H	missense	Uncertain Significance				< 10	371645281	0.009
1	13933727	13933727	p36.21	A	G	SNV	Exonic	PDPN	ENST00000513143.5; ENST00000376057.8; ENST00000510906.5; ENST00000487038.5; NM_001385053.1; ENST00000376061.8; NM_198389.2; NM_001006625.2; NM_006474.5; NM_001006624.2; ENST00000621990.5; ENST00000294489.10	c.127A>G; c.1A>G; c.355A>G	p.M119V; p.M43V; p.M1V	start loss; missense	Likely Benign	Tolerated	0.57	Benign	< 10	141726617	0.198
1	14107112	14107112	p36.21	C	T	SNV	Exonic; Intronic	PRDM2	NM_001007257.3; ENST00000376048.9; ENST00000413440.5; NM_012231.4; NM_001135610.2; ENST00000505823.5; NM_015866.5; ENST00000503842.5; ENST00000343137.8; ENST00000235372.11	c.511+31130C>T; c.2219C>T; c.2822C>T; c.19+7429C>T	p.T941I; p.T740I	missense	Likely Benign	Tolerated	0.07	Benign	11.86	112801771	0.217	RCV000889335.1
1	14108060	14108062	p36.21	AAG		Deletion	Exonic; Intronic	PRDM2	NM_001007257.3; ENST00000376048.9; ENST00000413440.5; NM_012231.4; NM_001135610.2; ENST00000505823.5; NM_015866.5; ENST00000503842.5; ENST00000343137.8; ENST00000235372.11	c.511+32085_511+32087delAGA; c.3777_3779delAGA; c.3174_3176delAGA; c.19+8384_19+8386delAGA	p.E1261del; p.E1060del	in-frame	Uncertain Significance				20.2	147285105	0.416
1	14109033	14109033	p36.21	G	C	SNV	Exonic; Intronic	PRDM2	NM_001007257.3; ENST00000376048.9; ENST00000413440.5; NM_012231.4; NM_001135610.2; ENST00000505823.5; NM_015866.5; ENST00000503842.5; ENST00000343137.8; ENST00000235372.11	c.4140G>C; c.19+9350G>C; c.511+33051G>C; c.4743G>C	p.M1380I; p.M1581I	missense	Uncertain Significance	Tolerated	0.12	Benign	21.4	1455834219	0.003
1	15541744	15541744	p36.21	G	A	SNV	Exonic; Intronic	TMEM51	NM_001319665.2; NM_001136218.2; NM_018022.3; ENST00000376014.7; NM_001136217.2; ENST00000434578.6; NR_135082.2; ENST00000376008.3; NM_001136216.2; ENST00000400796.7	c.161G>A; n.557+5G>A	p.G54D	missense	Uncertain Significance	Tolerated	0.2	Benign	17.16	780988356	0
1	15545954	15545954	p36.21	G	A	SNV	Exonic; ncRNA; 3'UTR	TMEM51	NM_001319665.2; NM_001136218.2; NM_018022.3; ENST00000376014.7; NM_001136217.2; ENST00000434578.6; NR_135082.2; ENST00000376008.3; NM_001136216.2; ENST00000400796.7	c.477G>A; n.690G>A; c.*65G>A	p.P159P	synonymous	Uncertain Significance				< 10	142174237	0.025
1	15653601	15653601	p36.21	C	T	SNV	ncRNA; Exonic	FHAD1; FHAD1-AS1	NR_148919.1; NM_052929.2; NR_148918.1; NM_001391957.1	n.2687G>A; n.2684G>A; c.1520C>T	p.A507V	missense	Likely Benign	Tolerated	0.88	Benign	< 10	375144290	0.111
1	15767012	15767012	p36.21	C	T	SNV	Intronic; Exonic	CTRC	ENST00000375943.6; ENST00000375949.5; NM_007272.3	c.41-1931C>T; c.156C>T	p.N52N	synonymous	Likely Benign				< 10	77373944	0.249	RCV001012226.1; RCV000265702.8					3979933	0.87
1	15772142	15772142	p36.21	G	A	SNV	Exonic; 3'UTR	CTRC	ENST00000375943.6; ENST00000375949.5; NM_007272.3	c.*144G>A; c.690G>A	p.E230E	synonymous	Likely Benign				< 10	75971387	0.245	RCV000290563.8; RCV001025794.1
1	15802611	15802611	p36.21	C	T	SNV	5'UTR	CELA2B	ENST00000375910.8; NM_015849.3	c.-10C>T			Likely Benign				< 10	113720469	0.278
1	15820448	15820448	p36.21	G	T	SNV	Exonic; ncRNA	CASP9	NM_001229.5; NR_102732.2; ENST00000333868.10; NR_102733.2; NM_032996.3; ENST00000348549.9; ENST00000375890.8; NM_001278054.2	n.972C>A; c.1097C>A; c.848C>A; n.1170C>A; c.647C>A	p.T366N; p.T216N; p.T283N	missense	Likely Benign	Tolerated	0.11	Possibly Damaging	23.5	61738967	0.304	RCV000963741.2
1	15890424	15890424	p36.21	G	A	SNV	Exonic; ncRNA	DNAJC16	NR_109898.2; ENST00000616884.4; ENST00000375849.5; ENST00000375847.8; NM_015291.4; NM_001287811.2	c.1339G>A; n.1468G>A; c.403G>A	p.V135M; p.V447M	missense	Uncertain Significance	Damaging	0.01	Possibly Damaging	32	144723605	0.011
1	16042833	16042833	p36.21	G	A	SNV	Exonic	PLEKHM2	ENST00000375799.8; ENST00000642363.1; NM_015164.4	c.162G>A	p.L54L	synonymous	Uncertain Significance				11.54	199666070	0.011	RCV000549678.4
1	16047858	16047858	p36.21	G	A	SNV	Exonic	PLEKHM2	ENST00000375799.8; ENST00000642363.1; NM_015164.4	c.687G>A	p.P229P	synonymous	Uncertain Significance				14.82	765614073	0.003
1	16053651	16053651	p36.21	C	G	SNV	Intronic; Exonic	PLEKHM2	ENST00000375799.8; ENST00000642363.1; NM_015164.4	c.997-36C>G; c.1084C>G	p.R362G	missense	Likely Benign	Tolerated	0.39	Benign	11.55	61738983	0.236	RCV000530825.5
1	16054305	16054305	p36.21	A	G	SNV	Exonic	PLEKHM2	ENST00000375799.8; ENST00000642363.1; NM_015164.4	c.1738A>G; c.1615A>G	p.M539V; p.M580V	missense	Uncertain Significance	Activating	1	Benign	12.27	375845025	0.004	RCV000698574.2
1	16055241	16055241	p36.21	C	T	SNV	Intronic	PLEKHM2	ENST00000375799.8; ENST00000642363.1; NM_015164.4	c.1863+13C>T; c.1986+13C>T			Uncertain Significance				< 10	201099827	0.019
1	16058483	16058483	p36.21	C	T	SNV	Exonic	PLEKHM2	ENST00000375799.8; ENST00000642363.1; NM_015164.4	c.2565C>T; c.2442C>T	p.A814A; p.A855A	synonymous	Uncertain Significance				< 10	368018228	0.004	RCV000945805.1; RCV001426939.1
1	16060340	16060340	p36.21	T	C	SNV	Exonic	PLEKHM2	ENST00000375799.8; ENST00000642363.1; NM_015164.4	c.2971T>C; c.2848T>C	p.F991L; p.F950L	missense	Uncertain Significance	Tolerated	0.19	Benign	23.5	201091991	0.006	RCV000655460.1
1	16060388	16060388	p36.21	A	G	SNV	Exonic	PLEKHM2	ENST00000375799.8; ENST00000642363.1; NM_015164.4	c.2896A>G; c.3019A>G	p.S1007G; p.S966G	missense	Uncertain Significance			Probably Damaging	27.7
1	16065088	16065088	p36.21	G	C	SNV	Splice Site	SLC25A34	ENST00000294454.6; NM_207348.3	c.598-1G>C			Uncertain Significance				35
1	16074094	16074094	p36.21	G	A	SNV	Intronic; Exonic	TMEM82; SLC25A34-AS1	ENST00000375782.2; NR_149050.1; NM_001013641.3	c.999G>A; n.461+1831C>T	p.S333S	synonymous	Uncertain Significance				< 10	201273367	0.003						6804338	0.16
1	16091593	16091593	p36.21	C	T	SNV	Exonic	FBLIM1	NM_001350151.2; ENST00000375766.8; ENST00000441801.6; ENST00000375771.5; NM_017556.4; NM_001024216.3; ENST00000332305.5; NM_001024215.1	c.115C>T	p.R39C	missense	Likely Benign	Tolerated	0.06	Benign	23.3	34375304	0.189	RCV000967905.1
1	16091652	16091652	p36.21	G	T	SNV	Exonic	FBLIM1	NM_001350151.2; ENST00000375766.8; ENST00000441801.6; ENST00000375771.5; NM_017556.4; NM_001024216.3; ENST00000332305.5; NM_001024215.1	c.174G>T	p.G58G	synonymous	Likely Benign				< 10	148775063	0.264
1	16095046	16095046	p36.21	C	T	SNV	Exonic; Intronic	FBLIM1	NM_001350151.2; ENST00000375766.8; ENST00000441801.6; ENST00000375771.5; NM_017556.4; NM_001024216.3; ENST00000332305.5; NM_001024215.1	c.462C>T; c.251-1858C>T	p.V154V	synonymous	Likely Benign				< 10	11811192	0.118
1	16101403	16101403	p36.21	G	A	SNV	Exonic; Intronic	FBLIM1	NM_001350151.2; ENST00000375766.8; ENST00000441801.6; ENST00000375771.5; NM_017556.4; NM_001024216.3; ENST00000332305.5; NM_001024215.1	c.890+112G>A; c.599+112G>A; c.1002G>A	p.L334L	synonymous	Likely Benign				< 10	12093675	0.257	RCV000969131.1
1	16256824	16256824	p36.13	T	G	SNV	Exonic	SPEN	NM_015001.3; ENST00000375759.8	c.4089T>G	p.D1363E	missense	Uncertain Significance	Tolerated	1	Benign	14.31	12095818	0.437
1	16258732	16258732	p36.13	G	A	SNV	Exonic	SPEN	NM_015001.3; ENST00000375759.8	c.5997G>A	p.K1999K	synonymous	Uncertain Significance				< 10	969430187	0.001
1	16260260	16260260	p36.13	C	T	SNV	Exonic	SPEN	NM_015001.3; ENST00000375759.8	c.7525C>T	p.R2509W	missense	Uncertain Significance	Damaging	0.01	Benign	24.2	761667751	0.001
1	16260382	16260382	p36.13	C	T	SNV	Exonic	SPEN	NM_015001.3; ENST00000375759.8	c.7647C>T	p.V2549V	synonymous	Likely Benign				< 10	145806207	0.109
1	16260863	16260863	p36.13	C		Deletion	Exonic	SPEN	NM_015001.3; ENST00000375759.8	c.8129delC	p.P2710fs*2	frameshift	Likely Pathogenic
1	16270394	16270394	p36.13	T	C	SNV	Intronic	ZBTB17	ENST00000537142.5; NM_001324137.2; NM_001287604.2; NM_001324138.2; ENST00000375743.9; NM_001287603.2; NM_001242884.2; NM_003443.3; ENST00000375733.6	c.1183-4A>G; c.1144-4A>G; c.1126-4A>G; c.1372-4A>G			Uncertain Significance				11.83	201683775	0.142
1	16271555	16271555	p36.13	A	G	SNV	Exonic	ZBTB17	ENST00000537142.5; NM_001324137.2; NM_001287604.2; NM_001324138.2; ENST00000375743.9; NM_001287603.2; NM_001242884.2; NM_003443.3; ENST00000375733.6	c.576T>C; c.558T>C; c.804T>C; c.615T>C	p.N268N; p.N186N; p.N205N; p.N192N	synonymous	Likely Benign				< 10	142017722	0.122
1	16273559	16273559	p36.13	C	T	SNV	Exonic; 5'UTR; Intronic	ZBTB17	ENST00000537142.5; NM_001324137.2; NM_001287604.2; NM_001324138.2; ENST00000375743.9; NM_001287603.2; NM_001242884.2; NM_003443.3; ENST00000375733.6	c.-4G>A; c.206-770G>A; c.265G>A; c.37G>A	p.V89M; p.V13M	missense	Uncertain Significance			Probably Damaging	26	114643617	0.095
1	16342103	16342103	p36.13	T	G	SNV	Exonic	HSPB7	NM_001349686.2; NM_014424.5; ENST00000375718.4; ENST00000311890.14; NM_001349687.2; NM_001349682.2; ENST00000487046.1; NM_001349688.2; ENST00000406363.2; NM_001349683.2; NM_001349685.2; NM_001349689.2; ENST00000411503.5	c.500A>C; c.497A>C; c.470A>C; c.482A>C; c.443A>C; c.485A>C; c.710A>C; c.467A>C	p.Q161P; p.Q162P; p.Q167P; p.Q156P; p.Q157P; p.Q166P; p.Q237P; p.Q148P	missense	Uncertain Significance			Benign	22.9	142826385	0.176
1	16352730	16352730	p36.13	C	T	SNV	Exonic	CLCNKA	ENST00000439316.6; ENST00000375692.5; NM_004070.4; ENST00000331433.5; NM_001042704.2; NM_001257139.2	c.357C>T; c.486C>T	p.F162F; p.F119F	synonymous	Likely Benign				< 10	115351575	0.199	RCV000516660.1; RCV000883489.2
1	16353287	16353287	p36.13	G	C	SNV	Intronic	CLCNKA	ENST00000439316.6; NM_004070.4; ENST00000375692.5; ENST00000331433.5; NM_001042704.2; NM_001257139.2	c.655+17G>C; c.526+17G>C			Uncertain Significance				< 10	749089655	0.003
1	16355613	16355613	p36.13	C	T	SNV	Intronic	CLCNKA	ENST00000439316.6; NM_004070.4; ENST00000375692.5; ENST00000331433.5; NM_001042704.2; NM_001257139.2	c.1054-8C>T; c.925-8C>T			Likely Benign				< 10	181589868	0.251
1	16355807	16355807	p36.13	A	G	SNV	Intronic	CLCNKA	ENST00000439316.6; ENST00000375692.5; NM_004070.4; ENST00000331433.5; NM_001042704.2; NM_001257139.2	c.1227+13A>G; c.1098+13A>G			Uncertain Significance				< 10	372473717	0.082
1	16355808	16355808	p36.13	C	T	SNV	Intronic	CLCNKA	ENST00000439316.6; ENST00000375692.5; NM_004070.4; ENST00000331433.5; NM_001042704.2; NM_001257139.2	c.1227+14C>T; c.1098+14C>T			Uncertain Significance				< 10	186447972	0.083
1	16357167	16357167	p36.13	C	T	SNV	Exonic	CLCNKA	ENST00000439316.6; NM_004070.4; ENST00000375692.5; ENST00000331433.5; NM_001042704.2; NM_001257139.2	c.1620C>T; c.1491C>T	p.I497I; p.I540I	synonymous	Likely Benign				< 10	139787278	0.052
1	16373058	16373058	p36.13	G	A	SNV	Exonic	CLCNKB	ENST00000375679.9; NM_000085.5	c.258G>A	p.G86G	synonymous	Likely Benign				< 10	143339401	0.097	RCV000967906.2; RCV000516436.1
1	16374849	16374849	p36.13	G	C	SNV	Promoter; Exonic	CLCNKB	ENST00000375679.9; NM_001165945.2; ENST00000375667.7; NM_000085.5	c.-618G>C; c.510G>C	p.V170V	synonymous	Likely Benign				11.75	34591564	0.16	RCV000958812.2	261156
1	16377048	16377048	p36.13	G	A	SNV	Exonic	CLCNKB	ENST00000375679.9; NM_001165945.2; ENST00000375667.7; NM_000085.5	c.499G>A; c.1006G>A	p.A336T; p.A167T	missense	Uncertain Significance	Damaging	0.01	Probably Damaging	25.3	371548242	0.002	RCV001280895.1
1	16378687	16378687	p36.13	T	C	SNV	Intronic	CLCNKB	ENST00000375679.9; NM_001165945.2; ENST00000375667.7; NM_000085.5	c.1409-6T>C; c.902-6T>C			Likely Benign				< 10	115910575	0.102	RCV000967907.2; RCV000516686.1
1	16382245	16382245	p36.13	C	T	SNV	Exonic	CLCNKB	ENST00000375679.9; NM_001165945.2; ENST00000375667.7; NM_000085.5	c.1921C>T; c.1411C>T	p.L471L; p.L641L	synonymous	Uncertain Significance				11.48	144941748	0.017
1	16384999	16384999	p36.13	G	C	SNV	Exonic	FAM131C	NM_182623.3; ENST00000375662.5	c.776C>G	p.P259R	missense	Likely Benign	Tolerated	0.08	Benign	< 10	1807284	0.395
1	16386395	16386395	p36.13	C	T	SNV	Exonic	FAM131C	NM_182623.3; ENST00000375662.5	c.420G>A	p.P140P	synonymous	Likely Benign				< 10	115727156	0.107
1	16389046	16389046	p36.13	G	C	SNV	Intronic	FAM131C	NM_182623.3; ENST00000375662.5	c.139-17C>G			Uncertain Significance				< 10	746869602	0.005
1	16389999	16389999	p36.13	G	A	SNV	Intronic	FAM131C	NM_182623.3; ENST00000375662.5	c.138+17C>T			Uncertain Significance				< 10	757003155	0.001
1	16461627	16461627	p36.13	C	T	SNV	Exonic	EPHA2	ENST00000358432.8; NM_004431.5; NM_001329090.2	c.1324G>A; c.1486G>A	p.D496N; p.D442N	missense	Likely Benign	Tolerated	0.31	Benign	22.3	115171763	0.1	RCV000871108.1
1	16578017	16578017	p36.13	G	A	SNV	Exonic	FBXO42	ENST00000375592.8; NM_018994.3	c.1302C>T	p.D434D	synonymous	Likely Benign				< 10	148759078	0.119
1	16719848	16719848	p36.13	A	G	SNV	Exonic; ncRNA; Intronic	SZRD1	NR_073501.2; ENST00000492354.1; ENST00000401088.9; NR_073500.2; NR_073503.2; NM_001114600.3; NM_001271869.2; ENST00000401089.3; NR_073502.2; ENST00000471507.5	c.167A>G; n.68-1685A>G; c.227A>G; n.190A>G; c.170A>G; n.314A>G; n.193A>G; c.224A>G	p.N56S; p.N57S; p.N75S; p.N76S	missense	Uncertain Significance	Tolerated	0.78	Benign	20.6	199624690	0.026
1	16719900	16719900	p36.13	C	T	SNV	Exonic; ncRNA; Intronic	SZRD1	NR_073501.2; ENST00000492354.1; ENST00000401088.9; NR_073500.2; NR_073503.2; NM_001114600.3; NM_001271869.2; ENST00000401089.3; NR_073502.2; ENST00000471507.5	c.276C>T; c.279C>T; c.219C>T; n.245C>T; n.366C>T; n.68-1633C>T; n.242C>T; c.222C>T	p.A92A; p.A93A; p.A74A; p.A73A	synonymous	Likely Benign				< 10	140065746	0.191
1	16775642	16775642	p36.13	C	T	SNV	Exonic	NECAP2	ENST00000443980.6; ENST00000337132.10; NM_001145278.2; ENST00000457722.6; NM_001145277.2; NM_018090.5	c.435C>T; c.357C>T	p.G145G; p.G119G	synonymous	Uncertain Significance				10.22	143289277	0.08
1	16785327	16785327	p36.13	C	G	SNV	Intronic	NECAP2	ENST00000443980.6; NM_001145278.2; ENST00000337132.10; ENST00000457722.6; NM_001145277.2; NM_018090.5	c.666-10C>G; c.668-10C>G; c.744-10C>G			Uncertain Significance				13.19	78750066	0.18
1	16891326	16891326	p36.13	T	C	SNV	Exonic	NBPF1	NM_017940.6	c.3377A>G	p.E1126G	missense	Uncertain Significance				21.9	770437557	0.113
1	16910181	16910181	p36.13	C	G	SNV	Exonic	NBPF1	NM_017940.6	c.999G>C	p.E333D	missense	Uncertain Significance				10.89	201327573	0.374
1	16918397	16918397	p36.13	C	G	SNV	Exonic	NBPF1	NM_017940.6	c.120G>C	p.E40D	missense	Uncertain Significance				11.12	201111313	0.005
1	17256459	17256459	p36.13	G	A	SNV	Exonic	CROCC	NM_014675.5	c.470G>A	p.R157H	missense	Uncertain Significance	Damaging	0.02	Probably Damaging	27.3	147890555	0.08
1	17256645	17256645	p36.13	G	T	SNV	Exonic	CROCC	NM_014675.5	c.564G>T	p.S188S	synonymous	Likely Benign				< 10	149095491	0.168
1	17263230	17263230	p36.13	G	A	SNV	Exonic	CROCC	NM_014675.5	c.1055G>A	p.R352Q	missense	Uncertain Significance	Tolerated	0.46	Benign	14.27	76836479	0.189
1	17265427	17265427	p36.13	C	T	SNV	Exonic	CROCC	NM_014675.5	c.1398C>T	p.S466S	synonymous	Uncertain Significance				< 10	145341541	0.064
1	17272077	17272077	p36.13	C	T	SNV	Exonic	CROCC	NM_014675.5	c.2112C>T	p.A704A	synonymous	Likely Benign				< 10	140598698	0.252
1	17272777	17272777	p36.13	C	T	SNV	Exonic	CROCC	NM_014675.5	c.2160C>T	p.L720L	synonymous	Likely Benign				< 10	146539995	0.179
1	17287516	17287516	p36.13	G	A	SNV	Exonic	CROCC	NM_014675.5	c.4296G>A	p.Q1432Q	synonymous	Likely Benign				10.27	566573922	0.789
1	17292906	17292906	p36.13	G	T	SNV	Exonic	CROCC	NM_014675.5	c.4700G>T	p.R1567L	missense	Uncertain Significance	Tolerated	0.17	Possibly Damaging	25	182717735	0.063
1	17292909	17292909	p36.13	G	A	SNV	Exonic	CROCC	NM_014675.5	c.4703G>A	p.R1568H	missense	Uncertain Significance	Tolerated	0.17	Probably Damaging	28.2	763513344	0.004
1	17292924	17292924	p36.13	G	A	SNV	Exonic	CROCC	NM_014675.5	c.4718G>A	p.R1573Q	missense	Uncertain Significance	Tolerated	0.09	Probably Damaging	23.4	114546248	0.341
1	17298926	17298926	p36.13	C	T	SNV	Exonic	CROCC	NM_014675.5	c.6039C>T	p.G2013G	synonymous	Uncertain Significance				< 10	138350316	0.036
1	17312829	17312829	p36.13	C	T	SNV	Exonic	ATP13A2	ENST00000452699.5; NM_022089.4; ENST00000326735.13; ENST00000341676.9; NM_001141973.3; NM_001141974.3	c.3415G>A; c.3128G>A; c.3430G>A	p.A1139T; p.R1043H; p.A1144T	missense	Likely Benign	Tolerated	0.41	Benign	15.62	151181674	0.186	RCV000716163.1; RCV000675887.5; RCV000116443.5; RCV001087148.2
1	17319011	17319011	p36.13	G	T	SNV	Exonic	ATP13A2	ENST00000452699.5; NM_022089.4; ENST00000326735.13; ENST00000341676.9; NM_001141973.3; NM_001141974.3	c.1815C>A; c.1800C>A	p.P600P; p.P605P	synonymous	Uncertain Significance				< 10
1	17331211	17331211	p36.13	G	A	SNV	Exonic	ATP13A2	ENST00000452699.5; NM_022089.4; ENST00000326735.13; ENST00000341676.9; NM_001141973.3; NM_001141974.3	c.453C>T	p.S151S	synonymous	Likely Benign				< 10	55979991	0.151	RCV000710714.5; RCV001085302.2; RCV000716656.1
1	17338227	17338227	p36.13	C	G	SNV	Exonic	ATP13A2	ENST00000452699.5; NM_022089.4; ENST00000326735.13; ENST00000341676.9; NM_001141973.3; NM_001141974.3	c.7G>C	p.A3P	missense	Uncertain Significance	Damaging	0.01	Benign	17.63	549839037	0.031	RCV000991571.2; RCV001392172.1
1	17354373	17354374	p36.13		GAAGAA	Insertion	Intronic	SDHB	ENST00000375499.8; NM_003000.3	c.424-19_424-14dupTTCTTC			Likely Benign				11.03		0.441	RCV000248855.3; RCV000030449.1; RCV001285811.1	252770
1	17380483	17380483	p36.13	C	T	SNV	Exonic	SDHB	ENST00000375499.8; NM_003000.3	c.32G>A	p.R11H	missense	Uncertain Significance	Tolerated	0.06	Benign	18	111430410	0.054	RCV000568010.1; RCV000986269.1; RCV000607044.2; RCV000505348.1; RCV000232749.7; RCV000148868.1; RCV001253761.1; RCV000662963.1	251782
1	17548892	17548892	p36.13	G	A	SNV	Exonic	PADI1	ENST00000375471.5; NM_013358.3	c.200G>A	p.R67H	missense	Likely Benign	Tolerated	0.44	Benign	< 10	11203335	0.159
1	17552586	17552586	p36.13	C	T	SNV	Exonic	PADI1	ENST00000375471.5; NM_013358.3	c.585C>T	p.D195D	synonymous	Uncertain Significance				< 10	72895797	0.067
1	17570672	17570672	p36.13	G	A	SNV	Exonic	PADI1	ENST00000375471.5; NM_013358.3	c.1926G>A	p.E642E	synonymous	Uncertain Significance				10.13	151272256	0.009
1	17588611	17588611	p36.13	C	T	SNV	Intronic	PADI3	NM_016233.2; ENST00000375460.3	c.274-17C>T			Uncertain Significance				< 10	375543510	0.042
1	17634769	17634769	p36.13	G	A	SNV	Exonic	PADI4	NM_012387.3; ENST00000375453.5; ENST00000375448.4	c.52G>A	p.V18M	missense	Uncertain Significance	Damaging	0	Probably Damaging	23.9	371193672	0.01
1	17736506	17736506	p36.13	C	T	SNV	Exonic	RCC2	NM_018715.4; ENST00000375433.3; NM_001136204.3; ENST00000375436.9	c.1428G>A	p.Q476Q	synonymous	Uncertain Significance				10.69	139019005	0.051
1	17743045	17743045	p36.13	C	T	SNV	Exonic	RCC2	NM_018715.4; ENST00000375433.3; NM_001136204.3; ENST00000375436.9	c.957G>A	p.T319T	synonymous	Uncertain Significance				< 10	11588635	0.09
1	18023617	18023617	p36.13	G	A	SNV	Exonic; ncRNA	ARHGEF10L	NM_018125.4; NM_001011722.2; ENST00000361221.8; NR_137288.2; NM_001328124.1; NR_137287.2; ENST00000375415.5; NM_001319837.1; NM_001319838.1	n.4505G>A; n.4625G>A; c.3465G>A; c.2916G>A; c.2691G>A; c.3582G>A; c.3450G>A	p.A1155A; p.A897A; p.A1194A; p.A1150A; p.A972A	synonymous	Likely Benign				< 10	148452069	0.048
1	18023821	18023821	p36.13	G	A	SNV	Exonic; ncRNA	ARHGEF10L	NM_018125.4; NM_001011722.2; ENST00000361221.8; NR_137288.2; NM_001328124.1; NR_137287.2; ENST00000375415.5; NM_001319837.1; NM_001319838.1	n.4829G>A; n.4709G>A; c.3786G>A; c.3654G>A; c.3120G>A; c.3669G>A; c.2895G>A	p.P965P; p.P1262P; p.P1218P; p.P1223P; p.P1040P	synonymous	Likely Benign				< 10	200943209	0.008
1	18152404	18152404	p36.13	G	A	SNV	Exonic	ACTL8	NM_030812.3; ENST00000375406.2; ENST00000617065.1	c.491G>A	p.R164H	missense	Uncertain Significance	Tolerated	0.52	Benign	< 10	924872941	0.003						296268	0.23
1	18688658	18688658	p36.13	C	T	SNV	Exonic	IGSF21	NM_032880.5; ENST00000251296.4	c.474C>T	p.F158F	synonymous	Uncertain Significance				13.08	151071673	0.009
1	18807851	18807851	p36.13	C	T	SNV	Exonic	KLHDC7A	ENST00000400664.3; NM_152375.3	c.376C>T	p.R126W	missense	Uncertain Significance	Tolerated	0.1	Benign	12.03	72944731	0.194
1	18808229	18808229	p36.13	C	T	SNV	Exonic	KLHDC7A	ENST00000400664.3; NM_152375.3	c.754C>T	p.Q252*	stop gain	Likely Benign				37	115859684	0.168	RCV000966731.1
1	18808485	18808485	p36.13	G	C	SNV	Exonic	KLHDC7A	ENST00000400664.3; NM_152375.3	c.1010G>C	p.G337A	missense	Uncertain Significance	Tolerated	0.76	Benign	< 10	140251743	0.075
1	18808919	18808919	p36.13	C	G	SNV	Exonic	KLHDC7A	ENST00000400664.3; NM_152375.3	c.1444C>G	p.L482V	missense	Uncertain Significance	Damaging	0.05	Probably Damaging	25.3	74056370	0.012
1	18809516	18809516	p36.13	C	T	SNV	Exonic	KLHDC7A	ENST00000400664.3; NM_152375.3	c.2041C>T	p.R681C	missense	Uncertain Significance	Damaging	0	Probably Damaging	32	76185413	0.005
1	19062208	19062208	p36.13	T	C	SNV	Exonic	PAX7	NM_013945.3; ENST00000400661.3; NM_002584.3; ENST00000420770.7; ENST00000375375.7; NM_001135254.2	c.1232T>C; c.1238T>C	p.L413P; p.L411P	missense	Uncertain Significance	Tolerated	0.13	Possibly Damaging	27.5	746475007	0.001
1	19175973	19175973	p36.13	G	A	SNV	Exonic	TAS1R2	ENST00000375371.3; NM_152232.4	c.1329C>T	p.D443D	synonymous	Likely Benign				< 10	35775756	0.239	RCV000883561.1
1	19181174	19181174	p36.13	G	T	SNV	Exonic	TAS1R2	ENST00000375371.3; NM_152232.4	c.790C>A	p.L264M	missense	Uncertain Significance	Damaging	0.02	Probably Damaging	23.7	74056647	0.144
1	19215877	19215877	p36.13	C	T	SNV	Exonic	ALDH4A1	ENST00000290597.9; ENST00000538839.5; NM_170726.3; NM_001161504.2; ENST00000375341.8; ENST00000538309.5; NM_001319218.2; NM_003748.4	c.48G>A; c.228G>A	p.S76S; p.S16S	synonymous	Likely Benign				< 10	145686117	0.226	RCV000865090.4
1	19215880	19215880	p36.13	C	T	SNV	Exonic	ALDH4A1	ENST00000290597.9; ENST00000538839.5; NM_170726.3; NM_001161504.2; ENST00000375341.8; ENST00000538309.5; NM_001319218.2; NM_003748.4	c.45G>A; c.225G>A	p.T75T; p.T15T	synonymous	Likely Benign				< 10	79920636	0.153	RCV000953922.3
1	19237949	19237949	p36.13	A	G	SNV	Exonic	IFFO2	NM_001136265.2	c.1246T>C	p.L416L	synonymous	Uncertain Significance				11.2
1	19415254	19415254	p36.13	G	A	SNV	Exonic	UBR4	ENST00000375224.1; NM_020765.3; ENST00000375254.8	c.1550C>T; c.14429C>T	p.T4810M; p.T517M	missense	Uncertain Significance			Probably Damaging	32	144364399	0.008
1	19430684	19430684	p36.13	A	G	SNV	5'UTR; Exonic	UBR4	ENST00000375224.1; NM_020765.3; ENST00000375254.8	c.12795T>C; c.-85T>C	p.T4265T	synonymous	Likely Benign				< 10	11586454	0.24	RCV000966732.2
1	19557838	19557838	p36.13	G	A	SNV	Exonic; Intronic	EMC1-AS1; EMC1	NM_001271427.2; ENST00000375208.7; NM_001375820.1; ENST00000477853.6; NM_001271429.2; NM_001271428.2; NM_015047.3; ENST00000375199.7; NM_001375821.1; NR_135114.1	c.1861C>T; c.1870C>T; c.1867C>T; c.1858C>T; n.175-8913G>A; c.1795C>T	p.R623C; p.R620C; p.R599C; p.R621C; p.R624C	missense	Likely Benign	Tolerated	0.18	Possibly Damaging	25.1	116784512	0.167	RCV000880539.3
1	19557912	19557912	p36.13	G	A	SNV	Exonic; Intronic	EMC1-AS1; EMC1	NM_001271427.2; ENST00000375208.7; NM_001375820.1; ENST00000477853.6; NM_001271429.2; NM_001271428.2; NM_015047.3; ENST00000375199.7; NM_001375821.1; NR_135114.1	c.1787C>T; c.1721C>T; c.1784C>T; c.1793C>T; n.175-8839G>A; c.1796C>T	p.S595L; p.S574L; p.S596L; p.S598L; p.S599L	missense	Likely Benign	Damaging	0.01	Benign	23.4	140940082	0.126	RCV000882538.3
1	19564554	19564554	p36.13	G	A	SNV	Exonic; Intronic	EMC1-AS1; EMC1	NM_001271427.2; ENST00000375208.7; NM_001375820.1; ENST00000477853.6; NM_001271429.2; NM_015047.3; NM_001271428.2; ENST00000375199.7; NM_001375821.1; NR_135114.1	c.1166C>T; c.1103C>T; c.1169C>T; n.175-2197G>A	p.T390M; p.T368M; p.T389M	missense	Likely Benign	Damaging	0.05	Possibly Damaging	16.59	144716849	0.136	RCV000952290.3
1	19584336	19584336	p36.13	G	A	SNV	Exonic	MRTO4	ENST00000330263.5; NM_016183.4	c.351G>A	p.T117T	synonymous	Likely Benign				< 10	116573119	0.629
1	19638504	19638504	p36.13	C	A	SNV	Promoter; Exonic	AKR7A2; SLC66A1	NM_001320979.1; NM_001040125.2; ENST00000400548.6; NM_017765.3; NR_109848.2; NM_003689.4; ENST00000375153.8; ENST00000375155.7; NM_001287531.2; NM_001040126.2; ENST00000235835.8	c.-958C>A; n.-316C>A; c.-588C>A; c.-541C>A; c.-648C>A; c.115G>T	p.A39S	missense	Uncertain Significance	Tolerated	0.71	Benign	10.78	755433212	0.004
1	19992510	19992510	p36.13	G	A	SNV	Exonic	HTR6	NM_000871.3; ENST00000289753.2	c.264G>A	p.L88L	synonymous	Likely Benign				11.59	111648246	0.233	RCV000961259.1
1	20066439	20066439	p36.13	G	A	SNV	Exonic	TMCO4	NM_001349113.3; ENST00000294543.11; ENST00000375127.5; NM_001349114.3; NM_181719.7; NM_001349112.3	c.1057C>T	p.L353L	synonymous	Likely Benign				11.48	144670706	0.184
1	20082247	20082247	p36.13	G	C	SNV	Exonic	TMCO4	NM_001349113.3; ENST00000294543.11; ENST00000375127.5; NM_001349114.3; NM_001349115.1; NM_181719.7; NM_001349112.3	c.395C>G	p.A132G	missense	Uncertain Significance	Damaging	0.02	Possibly Damaging	25.6	74058627	0.091
1	20209171	20209171	p36.13	C	T	SNV	Exonic	OTUD3	NM_015207.2; ENST00000375120.4	c.165C>T	p.S55S	synonymous	Uncertain Significance				14.9	763789089	0.021
1	20249169	20249169	p36.13	G	A	SNV	Exonic	PLA2G2E	ENST00000375116.3; NM_014589.3	c.120C>T	p.N40N	synonymous	Likely Benign				< 10	145303802	0.068
1	20442005	20442005	p36.12	T	C	SNV	Intronic; Exonic	PLA2G2D	ENST00000617227.1; NM_012400.4; NM_001271814.2; ENST00000375105.8	c.185+821A>G; c.287A>G	p.H96R	missense	Uncertain Significance	Tolerated	0.39	Benign	14.59	62541892	0.168
1	20466640	20466640	p36.12	G	C	SNV	Intronic	PLA2G2F	NM_022819.4; NM_001360869.2; ENST00000375102.4	c.-13-19G>C; c.117-19G>C			Uncertain Significance				< 10	372533971	0.018
1	20466646	20466646	p36.12	C	T	SNV	Intronic	PLA2G2F	NM_022819.4; NM_001360869.2; ENST00000375102.4	c.-13-13C>T; c.117-13C>T			Uncertain Significance				< 10	746476211	0.003
1	20474861	20474861	p36.12	T	C	SNV	Exonic	PLA2G2F	NM_022819.4; NM_001360869.2; ENST00000375102.4	c.474T>C; c.603T>C	p.S201S; p.S158S	synonymous	Likely Benign				< 10	77067005	0.237
1	20639447	20639447	p36.12	C	T	SNV	5'UTR; Exonic	VWA5B1	NM_001039500.3; NM_001377531.1	c.-2C>T; c.258C>T	p.F86F	synonymous	Likely Benign				< 10	146371074	0.12
1	20649896	20649896	p36.12	C	T	SNV	Exonic	VWA5B1	NM_001039500.3; NM_001377531.1	c.699C>T; c.1014C>T	p.S338S; p.S233S	synonymous	Likely Benign				< 10	7526077	0.186
1	20656766	20656766	p36.12	C	T	SNV	Exonic	VWA5B1	NM_001039500.3; NM_001377531.1	c.1348C>T; c.1033C>T	p.Q450*; p.Q345*	stop gain	Uncertain Significance				43	61746771	0.176
1	20880267	20880268	p36.12		GAG	Insertion	Exonic	FAM43B	NM_207334.3; ENST00000332947.6	c.816_818dupGGA	p.E272dup	in-frame	Likely Benign				18.91		0.42
1	21013867	21013867	p36.12	G	A	SNV	Intronic	KIF17	NM_020816.4; NM_001287212.2; ENST00000400463.8; NM_001122819.3; ENST00000247986.2; ENST00000375044.5	c.1938+14C>T; c.1638+14C>T			Uncertain Significance				< 10	376321313	0.013
1	21014202	21014202	p36.12	A	T	SNV	Exonic	KIF17	NM_020816.4; NM_001287212.2; ENST00000400463.8; NM_001122819.3; ENST00000247986.2; ENST00000375044.5	c.1617T>A; c.1317T>A	p.S539R; p.S439R	missense	Uncertain Significance	Tolerated	0.5	Benign	< 10	115071410	0.059
1	21014265	21014265	p36.12	G	A	SNV	Exonic	KIF17	NM_020816.4; NM_001287212.2; ENST00000400463.8; NM_001122819.3; ENST00000247986.2; ENST00000375044.5	c.1554C>T; c.1254C>T	p.S518S; p.S418S	synonymous	Likely Benign				< 10	115506787	0.052
1	21014382	21014382	p36.12	C	T	SNV	Exonic	KIF17	NM_020816.4; NM_001287212.2; ENST00000400463.8; NM_001122819.3; ENST00000247986.2; ENST00000375044.5	c.1437G>A; c.1137G>A	p.E379E; p.E479E	synonymous	Likely Benign				< 10	1251082518	0.003
1	21051058	21051058	p36.12	C	T	SNV	Exonic	SH2D5	ENST00000375031.5; NM_001103161.2; NM_001103160.2; ENST00000444387.7	c.461G>A; c.209G>A	p.R70Q; p.R154Q	missense	Uncertain Significance	Tolerated	0.6	Benign	20.2	201357087	0.029
1	21155679	21155679	p36.12	A	G	SNV	Exonic	EIF4G3	ENST00000602326.5; ENST00000400422.6; NM_001391900.1; NM_001391897.1; NM_001391898.1; NM_001391904.1; NM_001198802.2; NM_001391893.1; NM_003760.4; NM_001391896.1; NM_001391903.1; NM_001391892.1; NM_001198801.2; NM_001391907.1; NM_001391902.1; NM_001391906.1; NM_001391894.1; NM_001391901.1; NM_001391899.1; NM_001391905.1	c.4001T>C; c.3998T>C; c.4238T>C; c.3833T>C; c.4148T>C; c.4124T>C; c.3980T>C; c.4091T>C; c.4013T>C; c.3977T>C; c.4088T>C	p.M1326T; p.M1338T; p.M1327T; p.M1333T; p.M1278T; p.M1413T; p.M1334T; p.M1364T; p.M1375T; p.M1363T; p.M1383T	missense	Likely Benign	Tolerated	0.16	Possibly Damaging	23.7	111817671	0.224	RCV000968819.1
1	21177800	21177800	p36.12	A	T	SNV	Exonic	EIF4G3	ENST00000602326.5; ENST00000400422.6; NM_001391900.1; NM_001391897.1; NM_001391898.1; NM_001391904.1; NM_001198802.2; NM_001391893.1; NM_003760.4; NM_001391896.1; NM_001391903.1; NM_001391892.1; NM_001198801.2; NM_001391907.1; NM_001391902.1; NM_001391906.1; NM_001391894.1; NM_001391901.1; NM_001391899.1; NM_001391905.1	c.3813T>A; c.3588T>A; c.3408T>A; c.3699T>A; c.3666T>A; c.3663T>A; c.3552T>A; c.3573T>A; c.3555T>A; c.3576T>A; c.3723T>A	p.D1136E; p.D1221E; p.D1222E; p.D1233E; p.D1271E; p.D1191E; p.D1192E; p.D1241E; p.D1184E; p.D1196E; p.D1185E	missense	Likely Benign	Tolerated	0.59	Benign	< 10	2230572	0.114
1	21219110	21219110	p36.12	A	G	SNV	Splice Site; Intronic	EIF4G3	ENST00000400422.6; ENST00000602326.5; NM_001391900.1; NM_001391897.1; NM_001391898.1; NM_001391904.1; NM_001198802.2; NM_001391893.1; NM_003760.4; NM_001391896.1; NM_001391903.1; NM_001391892.1; NM_001198801.2; NM_001391907.1; NM_001391902.1; NM_001391906.1; NM_001391894.1; NM_001391901.1; NM_001391899.1; NM_001391905.1	c.2106+900T>C; c.2085+900T>C; c.2118+900T>C; c.2082+900T>C; c.2253+900T>C; c.2196+2T>C; c.2103+900T>C; c.1938+900T>C; c.2193+2T>C; c.2343+2T>C; c.2196+900T>C; c.2229+900T>C			Uncertain Significance				23	181814126	0.177
1	21553648	21553648	p36.12	G	A	SNV	Intronic	ECE1	ENST00000264205.10; ENST00000649812.1; NM_001113349.2; ENST00000436918.6; ENST00000357071.8; NM_001397.3; ENST00000415912.6; NM_001113347.2; ENST00000374893.11; NM_001113348.2	c.1801+4C>T; c.1813+4C>T; c.1840+4C>T; c.1849+4C>T			Uncertain Significance				< 10	375172359	0.002
1	21554507	21554507	p36.12	G	A	SNV	Exonic	ECE1	ENST00000264205.10; ENST00000649812.1; NM_001113349.2; ENST00000436918.6; ENST00000357071.8; NM_001397.3; ENST00000415912.6; NM_001113347.2; ENST00000374893.11; NM_001113348.2	c.1662C>T; c.1650C>T; c.1698C>T; c.1689C>T	p.N563N; p.N550N; p.N566N; p.N554N	synonymous	Uncertain Significance				< 10	563985263	0.005						903799	0.57
1	21586875	21586875	p36.12	C	T	SNV	Exonic	ECE1	ENST00000264205.10; ENST00000649812.1; NM_001113349.2; ENST00000436918.6; ENST00000357071.8; NM_001397.3; ENST00000415912.6; NM_001113347.2; ENST00000374893.11; NM_001113348.2	c.456G>A; c.504G>A; c.468G>A; c.495G>A	p.T152T; p.T165T; p.T156T; p.T168T	synonymous	Likely Benign				< 10	13306313	0.197	RCV000882996.2
1	21798154	21798154	p36.12	A	G	SNV	Exonic; ncRNA	NBPF3	ENST00000342104.9; NM_001377494.1; NM_001377493.1; NM_001256417.4; NM_001377492.1; ENST00000619554.1; NM_001377496.1; NM_001256416.4; NM_001330381.3; ENST00000318249.10; NM_001377491.1; NR_046176.4; ENST00000454000.6; NM_001377495.1; NM_032264.6	c.371A>G; c.539A>G; n.1419A>G; c.329A>G	p.N180S; p.N110S; p.N124S	missense	Uncertain Significance	Tolerated	0.12	Benign	< 10	75067863	0.028
1	21799346	21799346	p36.12	C	G	SNV	Exonic; ncRNA	NBPF3	ENST00000342104.9; NM_001377494.1; NM_001377493.1; NM_001256417.4; NM_001377492.1; ENST00000619554.1; NM_001377496.1; NM_001256416.4; NM_001330381.3; ENST00000318249.10; NM_001377491.1; NR_046176.4; ENST00000454000.6; NM_001377495.1; NM_032264.6	c.672C>G; c.462C>G; n.1552C>G; c.504C>G	p.D154E; p.D168E; p.D224E	missense	Uncertain Significance	Activating	1	Benign	< 10	139898385	0.128
1	21890671	21890671	p36.12	A	G	SNV	Exonic	ALPL	NM_001369804.2; NM_001369803.2; ENST00000374832.5; ENST00000374840.8; ENST00000540617.5; NM_001127501.4; NM_001177520.3; NM_000478.6; ENST00000539907.5; NM_001369805.2	c.610A>G; c.445A>G; c.379A>G	p.I204V; p.I149V; p.I127V	missense	Uncertain Significance	Damaging	0.04	Benign	23.4	374558572	0.003	RCV000723000.1
1	21896864	21896864	p36.12	T	C	SNV	Exonic	ALPL	NM_001369804.2; NM_001369803.2; ENST00000374832.5; ENST00000374840.8; ENST00000540617.5; NM_001127501.4; NM_001177520.3; NM_000478.6; ENST00000539907.5; NM_001369805.2	c.859T>C; c.694T>C; c.628T>C	p.L287L; p.L232L; p.L210L	synonymous	Uncertain Significance				12.14	141742288	0.045	RCV001287210.1; RCV001277096.1; RCV000914455.4	262438
1	21902347	21902347	p36.12	C	T	SNV	Exonic	ALPL	NM_001369804.2; NM_001369803.2; ENST00000374832.5; ENST00000374840.8; ENST00000540617.5; NM_001127501.4; NM_001177520.3; NM_000478.6; ENST00000539907.5; NM_001369805.2	c.954C>T; c.888C>T; c.1119C>T	p.T318T; p.T373T; p.T296T	synonymous	Likely Benign				< 10	112335417	0.271	RCV000344290.2; RCV000710509.5; RCV001285512.1	255883
1	21903947	21903947	p36.12	G	A	SNV	Exonic	ALPL	NM_001369804.2; NM_001369803.2; ENST00000374832.5; ENST00000374840.8; ENST00000540617.5; NM_001127501.4; NM_000478.6; NM_001177520.3; ENST00000539907.5; NM_001369805.2	c.1381G>A; c.1216G>A; c.1150G>A	p.V406I; p.V384I; p.V461I	missense	Uncertain Significance	Tolerated	1	Benign	15.42	34810399	0.275	RCV001285513.1; RCV000390811.3; RCV000514153.4	255884
1	21936718	21936718	p36.12	C	T	SNV	Exonic; ncRNA; Splice Site	RAP1GAP	NM_001388255.1; NM_001388240.1; NM_001388228.1; ENST00000495204.5; NM_001388263.1; ENST00000374763.6; NM_001388221.1; NM_001388236.1; NR_170911.1; NM_001388286.1; NM_001388205.1; NR_170926.1; NM_001388213.1; NR_170929.1; NM_001388266.1; NR_170914.1; NM_001388239.1; NM_001330383.3; NM_001350526.2; NM_001388216.1; NR_170906.1; NM_001388289.1; NM_001388251.1; NM_001388247.1; NM_001388201.1; NM_00138…	n.1778G>A; c.867G>A; c.777G>A; n.1562G>A; c.1080G>A; c.844-1G>A; n.1150G>A; n.1062G>A; n.1253G>A; c.810G>A; c.894G>A; n.1229G>A; n.2104G>A; c.429G>A; c.1036-1G>A; c.1086G>A; c.855G>A; n.1830G>A; n.1096-1G>A; n.1146G>A; n.1162G>A; n.1336G>A; n.1110G>A	p.Q285Q; p.Q362Q; p.Q289Q; p.Q298Q; p.Q270Q; p.Q259Q; p.Q360Q; p.Q143Q	synonymous	Uncertain Significance				11.87	367737815	0.001
1	21936751	21936751	p36.12	G	A	SNV	Exonic; ncRNA; Intronic	RAP1GAP	NM_001388255.1; NM_001388240.1; NM_001388228.1; ENST00000495204.5; NM_001388263.1; ENST00000374763.6; NM_001388221.1; NM_001388236.1; NR_170911.1; NM_001388286.1; NM_001388205.1; NR_170926.1; NM_001388213.1; NR_170929.1; NM_001388266.1; NR_170914.1; NM_001388239.1; NM_001330383.3; NM_001350526.2; NM_001388216.1; NR_170906.1; NM_001388289.1; NM_001388251.1; NM_001388247.1; NM_001388201.1; NM_00138…	n.1113C>T; c.396C>T; n.1117C>T; n.1797C>T; c.822C>T; n.2071C>T; n.1303C>T; c.744C>T; c.1036-34C>T; n.1529C>T; n.1196C>T; n.1029C>T; n.1077C>T; n.1220C>T; c.1053C>T; c.834C>T; c.861C>T; c.777C>T; n.1745C>T; c.1047C>T; n.1096-34C>T; c.844-34C>T; n.1129C>T	p.H132H; p.H278H; p.H351H; p.H274H; p.H259H; p.H287H; p.H248H; p.H349H	synonymous	Uncertain Significance				11.55	147013203	0.016
1	21940550	21940550	p36.12	G	A	SNV	Exonic; ncRNA; 5'UTR	RAP1GAP	NR_170903.1; NM_001388240.1; NM_001388228.1; ENST00000495204.5; NM_001388263.1; ENST00000374763.6; NM_001388221.1; NM_001388236.1; NR_170911.1; NM_001388286.1; NM_001388205.1; NR_170926.1; NM_001388213.1; NR_170929.1; NM_001388266.1; NR_170914.1; NM_001388239.1; NM_001330383.3; NM_001350526.2; NM_001388216.1; NR_170906.1; NM_001388289.1; NM_001388251.1; NM_001388247.1; NM_001388201.1; NM_00138829…	n.992C>T; c.-142C>T; n.576C>T; c.324C>T; n.592C>T; c.516C>T; c.285C>T; n.540C>T; n.1224C>T; n.766C>T; n.1208C>T; c.207C>T; n.580C>T; n.1534C>T; n.659C>T; c.297C>T; n.683C>T	p.A99A; p.A95A; p.A108A; p.A172A; p.A69A	synonymous	Uncertain Significance				12.76	112049462	0.267
1	22149866	22149866	p36.12	G	A	SNV	Exonic; Intronic; 3'UTR	LDLRAD2; HSPG2	NM_001013693.3; ENST00000543870.1; ENST00000374695.8; NM_001291860.2; ENST00000344642.7; NM_005529.7	c.*1158G>A; c.*219-537G>A; c.13119C>T; c.13122C>T	p.P4374P; p.P4373P	synonymous	Likely Benign				< 10	2229477	0.303	RCV000958427.5; RCV000342303.2; RCV001289644.1; RCV000407708.2	1051040
1	22150813	22150813	p36.12	C	A	SNV	Exonic; 3'UTR	LDLRAD2; HSPG2	NM_001013693.3; ENST00000374695.8; NM_001291860.2; ENST00000344642.7; NM_005529.7	c.*2105C>A; c.12804G>T; c.12801G>T	p.G4268G; p.G4267G	synonymous	Likely Benign				< 10	79386413	0.258	RCV001283599.1; RCV000756263.6; RCV001101424.1; RCV001289454.1; RCV001101425.1
1	22151214	22151214	p36.12	G	C	SNV	Exonic; 3'UTR	LDLRAD2; HSPG2	NM_001013693.3; ENST00000374695.8; NM_001291860.2; ENST00000344642.7; NM_005529.7	c.12651C>G; c.*2506G>C; c.12648C>G	p.G4217G; p.G4216G	synonymous	Likely Benign				< 10	938657534
1	22154365	22154365	p36.12	C	T	SNV	Exonic	HSPG2	ENST00000374695.8; NM_001291860.2; NM_005529.7	c.12583G>A; c.12580G>A	p.G4195R; p.G4194R	missense	Uncertain Significance	Damaging	0.03	Possibly Damaging	24.7	144496753	0.03	RCV000889501.1
1	22156539	22156539	p36.12	C	T	SNV	Exonic	HSPG2	ENST00000374695.8; NM_001291860.2; NM_005529.7	c.11717G>A; c.11720G>A	p.R3907Q; p.R3906Q	missense	Uncertain Significance	Tolerated	0.35	Benign	22.1	78944354	0.051	RCV000180429.1; RCV000756261.5
1	22162098	22162098	p36.12	G	A	SNV	Exonic	HSPG2	ENST00000374695.8; NM_001291860.2; NM_005529.7	c.10391C>T; c.10388C>T	p.T3464M; p.T3463M	missense	Uncertain Significance	Damaging	0.05	Benign	22.6	746472056	0.002
1	22166034	22166034	p36.12	G	A	SNV	Exonic	HSPG2	ENST00000374695.8; NM_001291860.2; NM_005529.7	c.9719C>T; c.9722C>T	p.A3241V; p.A3240V	missense	Likely Benign	Tolerated	0.48	Benign	< 10	62642505	0.278	RCV000999824.2; RCV001096595.1; RCV001288631.1; RCV000435763.6; RCV001096596.1
1	22172588	22172588	p36.12	C	G	SNV	Intronic	HSPG2	ENST00000374695.8; NM_001291860.2; NM_005529.7	c.8467+13G>C; c.8464+13G>C			Uncertain Significance				< 10	372691173	0.08
1	22174345	22174345	p36.12	C	T	SNV	Intronic	HSPG2	ENST00000374695.8; NM_001291860.2; NM_005529.7	c.7874-12G>A; c.7877-12G>A			Uncertain Significance				< 10	372722193	0.014
1	22183641	22183641	p36.12	C	T	SNV	Exonic	HSPG2	ENST00000374695.8; NM_001291860.2; NM_005529.7	c.5442G>A; c.5445G>A	p.L1815L; p.L1814L	synonymous	Likely Benign				< 10	115087461	0.269	RCV001283710.1; RCV001097456.1; RCV000756258.6; RCV001097455.1; RCV001288196.1
1	22191525	22191525	p36.12	C	T	SNV	Exonic	HSPG2	ENST00000374695.8; NM_001291860.2; NM_005529.7	c.4437G>A; c.4440G>A	p.E1480E; p.E1479E	synonymous	Likely Benign				< 10	141463803	0.055	RCV000369783.1; RCV000903500.2	1794036
1	22198724	22198724	p36.12	A	G	SNV	Exonic	HSPG2	ENST00000374695.8; NM_001291860.2; NM_005529.7	c.4176T>C; c.4179T>C	p.H1392H; p.H1393H	synonymous	Likely Benign				< 10	62642526	0.137	RCV000958432.4	1794037
1	22198768	22198768	p36.12	C	T	SNV	Exonic	HSPG2	ENST00000374695.8; NM_001291860.2; NM_005529.7	c.4135G>A; c.4132G>A	p.E1378K; p.E1379K	missense	Likely Benign	Damaging	0.01	Benign	23.2	62642525	0.141	RCV000757385.4; RCV000394536.2; RCV000335667.2; RCV000518718.1
1	22199531	22199531	p36.12	C	T	SNV	Exonic	HSPG2	ENST00000374695.8; NM_001291860.2; NM_005529.7	c.3850G>A; c.3847G>A	p.V1283I; p.V1284I	missense	Likely Benign	Tolerated	0.72	Benign	< 10	62642527	0.139	RCV000757379.5	1794038
1	22201099	22201099	p36.12	C	A	SNV	Intronic	HSPG2	ENST00000374695.8; NM_001291860.2; NM_005529.7	c.3531+10G>T; c.3528+10G>T			Likely Benign				< 10	367678569	0.078	RCV000596594.1; RCV000895695.2
1	22204957	22204957	p36.12	G	A	SNV	Exonic	HSPG2	ENST00000374695.8; NM_001291860.2; NM_005529.7	c.2586C>T; c.2589C>T	p.P862P; p.P863P	synonymous	Uncertain Significance				11.2	143110975	0.057	RCV000895696.2
1	22205496	22205496	p36.12	G	A	SNV	Exonic	HSPG2	ENST00000374695.8; NM_001291860.2; NM_005529.7	c.2462C>T; c.2465C>T	p.A821V; p.A822V	missense	Uncertain Significance	Damaging	0.05	Probably Damaging	23.8	141901178	0.079	RCV000711919.3; RCV000598253.1
1	22205601	22205601	p36.12	T	C	SNV	Exonic	HSPG2	ENST00000374695.8; NM_001291860.2; NM_005529.7	c.2357A>G; c.2360A>G	p.N787S; p.N786S	missense	Uncertain Significance	Damaging	0.02	Probably Damaging	24.6	143736974	0.64	RCV000883656.4; RCV000191094.2; RCV001286248.1; RCV001098138.1
1	22207027	22207027	p36.12	C	T	SNV	Exonic	HSPG2	ENST00000374695.8; NM_001291860.2; NM_005529.7	c.2024G>A; c.2027G>A	p.R675Q; p.R676Q	missense	Uncertain Significance	Damaging	0.01	Benign	17.8	143119915	0.058	RCV000711916.3
1	22207188	22207188	p36.12	T	G	SNV	Exonic	HSPG2	ENST00000374695.8; NM_001291860.2; NM_005529.7	c.1962A>C; c.1959A>C	p.Q653H; p.Q654H	missense	Likely Benign	Tolerated	0.75	Benign	< 10	62642535	0.111	RCV000757380.4	1794039
1	22333419	22333419	p36.12	T	C	SNV	Exonic	CELA3A	ENST00000290122.8; NM_005747.5	c.411T>C	p.D137D	synonymous	Likely Benign				< 10	138658162	0.182
1	22834640	22834640	p36.12	G	A	SNV	Intronic	ZBTB40	ENST00000374651.8; ENST00000375647.5; NM_001083621.2; NM_001330398.2; NM_014870.4	c.1161+10G>A; c.1497+10G>A			Uncertain Significance				< 10	138373371	0.062
1	22839486	22839486	p36.12	A	C	SNV	Exonic	ZBTB40	ENST00000374651.8; ENST00000375647.5; NM_001083621.2; NM_001330398.2; NM_014870.4	c.2531A>C; c.2195A>C	p.K732T; p.K844T	missense	Uncertain Significance	Damaging	0.04	Possibly Damaging	25	748113940	0
1	22839631	22839631	p36.12	G	A	SNV	Intronic	ZBTB40	ENST00000374651.8; ENST00000375647.5; NM_001083621.2; NM_001330398.2; NM_014870.4	c.2668+8G>A; c.2332+8G>A			Likely Benign				< 10	114030053	0.181
1	22846655	22846655	p36.12	C	T	SNV	Exonic	ZBTB40	ENST00000374651.8; ENST00000375647.5; NM_001083621.2; NM_001330398.2; NM_014870.4	c.2599C>T; c.2935C>T	p.P979S; p.P867S	missense	Uncertain Significance	Tolerated	0.06	Possibly Damaging	24.5	137897116	0.055
1	22920100	22920100	p36.12	C	T	SNV	Exonic	EPHA8	NM_020526.5; ENST00000166244.8	c.1524C>T	p.Y508Y	synonymous	Likely Benign				< 10	55964751	0.848	RCV000893500.1
1	22923859	22923859	p36.12	C	A	SNV	Exonic	EPHA8	NM_020526.5; ENST00000166244.8	c.1820C>A	p.P607H	missense	Uncertain Significance	Tolerated	0.6	Benign	17.68	144329757	0.712
1	22927430	22927430	p36.12	C	G	SNV	Exonic	EPHA8	NM_020526.5; ENST00000166244.8	c.2578C>G	p.P860A	missense	Uncertain Significance	Damaging	0	Possibly Damaging	25	374551936	0.004
1	22964176	22964176	p36.12	G	A	SNV	Exonic	C1QA	NM_001347465.2; ENST00000374642.8; ENST00000402322.1; NM_015991.4; NM_001347466.2	c.67G>A	p.E23K	missense	Likely Benign	Tolerated	0.3	Benign	< 10	17887074	0.344	RCV000625107.2; RCV000885716.3
1	23111268	23111268	p36.12	C	T	SNV	Exonic	EPHB2	NM_004442.7; ENST00000374632.7; ENST00000374630.8; ENST00000544305.5; NM_001309192.2; ENST00000400191.7; NM_017449.5; NM_001309193.2	c.510C>T	p.S170S	synonymous	Likely Benign				11.29	61732489	0.162	RCV000949465.1
1	23191720	23191720	p36.12	C	G	SNV	Intronic	EPHB2	NM_004442.7; ENST00000374632.7; ENST00000374630.8; ENST00000544305.5; NM_001309192.2; ENST00000400191.7; NM_017449.5; NM_001309193.2	c.1303+15C>G			Likely Benign				< 10	116602678	0.235
1	23222083	23222083	p36.12	G	C	SNV	Intronic	EPHB2	NM_004442.7; ENST00000374632.7; ENST00000374630.8; NM_001309192.2; ENST00000400191.7; NM_017449.5; NM_001309193.2	c.1591+2544G>C; c.1700+10G>C			Uncertain Significance				< 10	374837404	0.005
1	23232611	23232611	p36.12	C	T	SNV	Intronic	EPHB2	NM_004442.7; ENST00000374630.8; ENST00000374632.7; NM_001309192.2; ENST00000400191.7; NM_017449.5; NM_001309193.2	c.1891+9C>T; c.1888+9C>T; c.1714+9C>T			Likely Benign				12.58	184594165	0.096	RCV000963746.2
1	23240250	23240250	p36.12	A	T	SNV	Exonic; 3'UTR	EPHB2	NM_004442.7; ENST00000374630.8; ENST00000374632.7; NM_001309192.2; ENST00000400191.7; NM_017449.5; NM_001309193.2	c.3055A>T; c.*187A>T	p.K1019*	stop gain	Pathogenic				< 10	76826147	0.386	RCV000009061.15		600997	603688
1	23395593	23395593	p36.12	T	C	SNV	Exonic	KDM1A	ENST00000400181.9; ENST00000356634.7; NM_001363654.2; NM_015013.4; NM_001009999.3	c.1290T>C; c.1362T>C	p.H454H; p.H430H	synonymous	Uncertain Significance				< 10	150083149	0.015
1	23409803	23409803	p36.12	G	A	SNV	Exonic	KDM1A	ENST00000400181.9; ENST00000356634.7; NM_001363654.2; NM_015013.4; NM_001009999.3	c.2577G>A; c.2505G>A; c.2523G>A	p.T835T; p.T859T; p.T841T	synonymous	Likely Benign				< 10	150794224	0.107	RCV000894245.2
1	23417925	23417925	p36.12	C	T	SNV	Exonic	LUZP1	NM_033631.4; NM_001142546.3; ENST00000314174.5	c.2830G>A	p.V944M	missense	Uncertain Significance	Tolerated	0.12	Benign	11.5	549541205	0.003
1	23418576	23418576	p36.12	T	C	SNV	Exonic	LUZP1	NM_033631.4; NM_001142546.3; ENST00000314174.5	c.2179A>G	p.T727A	missense	Likely Benign	Tolerated	0.89	Benign	< 10	144862656	0.106	RCV000894246.1
1	23418666	23418666	p36.12	G	C	SNV	Exonic	LUZP1	NM_033631.4; NM_001142546.3; ENST00000314174.5	c.2089C>G	p.R697G	missense	Uncertain Significance	Tolerated	0.29	Possibly Damaging	23	773399767	0.001
1	23420281	23420281	p36.12	G	C	SNV	Exonic	LUZP1	NM_033631.4; NM_001142546.3; ENST00000314174.5	c.474C>G	p.L158L	synonymous	Uncertain Significance				10.68	150515276	0.097	RCV000894247.1
1	23519919	23519919	p36.12	G	A	SNV	Exonic	HTR1D	ENST00000374619.1; NM_000864.5	c.794C>T	p.S265L	missense	Likely Benign	Tolerated	0.36	Benign	16.25	6299	0.27	RCV000972621.1
1	23688957	23688957	p36.12	G	A	SNV	Exonic	ZNF436	NM_001077195.2; NM_001370652.1; ENST00000314011.9; ENST00000374608.3; NM_030634.3	c.918C>T; c.864C>T	p.Y288Y; p.Y306Y	synonymous	Uncertain Significance				10.23	149957442	0.054
1	23689581	23689581	p36.12	G	A	SNV	Exonic	ZNF436	NM_001077195.2; NM_001370652.1; ENST00000314011.9; ENST00000374608.3; NM_030634.3	c.294C>T; c.240C>T	p.S98S; p.S80S	synonymous	Uncertain Significance				< 10	113736308	0.055
1	23724265	23724265	p36.12	C	T	SNV	Intronic	TCEA3	ENST00000450454.7; NM_003196.3	c.607+20G>A			Uncertain Significance				< 10	185666511	0.011
1	23743859	23743859	p36.12	T	C	SNV	Exonic	TCEA3	ENST00000374601.7; ENST00000450454.7; NM_003196.3	c.263A>G	p.E88G	missense	Uncertain Significance	Tolerated	0.12	Benign	22.6	192746462	0.464
1	23782696	23782696	p36.12	A	C	SNV	Intronic	ASAP3	NM_017707.4; NM_001143778.2; ENST00000336689.8; ENST00000437606.6	c.130-9T>G			Uncertain Significance				11.82	1279589712	0.006
1	23842943	23842943	p36.12	G	A	SNV	Exonic	E2F2	NM_004091.4; ENST00000361729.3	c.929C>T	p.P310L	missense	Likely Benign	Tolerated	0.31	Benign	< 10	116576730	0.101	RCV000887779.1
1	23885662	23885662	p36.12	C	G	SNV	Exonic	ID3	ENST00000374561.6; NM_002167.5	c.256G>C	p.E86Q	missense	Uncertain Significance	Tolerated	0.14	Probably Damaging	24.7	61749352	0.274
1	24077853	24077853	p36.11	G	A	SNV	Exonic	ELOA	NM_003198.2; ENST00000613537.4; ENST00000609199.1; ENST00000418390.6	c.836G>A; c.758G>A	p.R279H; p.R253H	missense	Uncertain Significance	Tolerated	0.55	Benign	13.63	141832703	0.094
1	24078940	24078940	p36.11	C	T	SNV	Exonic	ELOA	NM_003198.2; ENST00000613537.4; ENST00000609199.1; ENST00000418390.6	c.1547C>T; c.1469C>T	p.A516V; p.A490V	missense	Likely Benign	Tolerated	0.63	Benign	< 10	550252	0.233
1	24122673	24122673	p36.11	C	T	SNV	Exonic	GALE	ENST00000374497.7; ENST00000617979.5; NM_001127621.2; NM_001008216.2; NM_000403.4	c.956G>A	p.G319E	missense	Likely Pathogenic	Damaging	0.01	Possibly Damaging	24.9	28940885	0.043	RCV000003866.3; RCV000078697.9		606953	230350
1	24122717	24122717	p36.11	C	T	SNV	Exonic	GALE	ENST00000374497.7; ENST00000617979.5; NM_001127621.2; NM_001008216.2; NM_000403.4	c.912G>A	p.V304V	synonymous	Uncertain Significance				11.22	143694860	0.119	RCV000275225.4; RCV000242891.3
1	24123210	24123210	p36.11	G	A	SNV	Exonic	GALE	ENST00000374497.7; ENST00000617979.5; NM_001127621.2; NM_001008216.2; NM_000403.4	c.772C>T	p.L258L	synonymous	Likely Benign				12.36	147618796	0.111	RCV000865486.4; RCV000180499.1
1	24125094	24125094	p36.11	C	T	SNV	Intronic	GALE	ENST00000374497.7; ENST00000617979.5; NM_001127621.2; NM_001008216.2; NM_000403.4	c.237+11G>A			Likely Benign				< 10	201276934	0.063	RCV001513537.1
1	24134712	24134712	p36.11	G	A	SNV	Exonic	HMGCL	NM_000191.3; ENST00000436439.6; ENST00000374490.8; NM_001166059.2	c.663C>T; c.450C>T	p.V221V; p.V150V	synonymous	Uncertain Significance				10.32	143884026	0.027	RCV000634902.4
1	24140784	24140784	p36.11	T	C	SNV	Intronic; Exonic	HMGCL	NM_000191.3; ENST00000436439.6; ENST00000374490.8; NM_001166059.2	c.393A>G; c.348+2381A>G	p.S131S	synonymous	Likely Benign				< 10	56218308	0.088	RCV000423153.2; RCV000536522.4
1	24147100	24147100	p36.11	G	A	SNV	Intronic	HMGCL	NM_000191.3; ENST00000436439.6; ENST00000374490.8; NM_001166059.2	c.61-17C>T			Likely Benign				14.34	56913973	0.104	RCV001516903.1; RCV000440837.2
1	24151858	24151858	p36.11	C	T	SNV	Exonic	HMGCL	NM_000191.3; ENST00000436439.6; ENST00000374490.8; NM_001166059.2	c.48G>A	p.A16A	synonymous	Likely Benign				15.26	115611440	0.388	RCV000441882.1; RCV000383162.6	746703
1	24180845	24180845	p36.11	C	G	SNV	Intronic	FUCA1	ENST00000374479.4; NM_000147.5	c.969+5G>C			Uncertain Significance				19.95	115939152	0.028	RCV000951797.2
1	24189638	24189638	p36.11	G	A	SNV	Exonic	FUCA1	ENST00000374479.4; NM_000147.5	c.648C>T	p.Y216Y	synonymous	Likely Benign				< 10	80358198	0.06	RCV000945680.4
1	24194770	24194770	p36.11	C	T	SNV	Exonic	FUCA1	ENST00000374479.4; NM_000147.5	c.7G>A	p.A3T	missense	Uncertain Significance			Benign	10.92	61996282	0.021
1	24201179	24201179	p36.11	G	A	SNV	Exonic	CNR2	ENST00000374472.5; NM_001841.3	c.929C>T	p.A310V	missense	Uncertain Significance	Tolerated	0.45	Benign	22.7	923029792	0.001
1	24201180	24201180	p36.11	C	G	SNV	Exonic	CNR2	ENST00000374472.5; NM_001841.3	c.928G>C	p.A310P	missense	Uncertain Significance	Tolerated	0.07	Possibly Damaging	25.7	954473721	0.001
1	24294451	24294452	p36.11		A	Insertion	Intronic; 3'UTR	SRSF10	ENST00000453840.7; NM_001300937.2; NM_001191007.3; NM_001191006.3; ENST00000484146.6; ENST00000374452.9; NM_001300936.2; NM_001191005.3; NM_001191009.3; ENST00000492112.3; NM_006625.6; NM_054016.4; NR_034035.3; ENST00000344989.10	c.438-238dupT; n.961-238dupT; c.489-5dupT; c.492-5dupT; c.*3181dupT; c.489-238dupT; c.492-238dupT; c.594-238dupT			Uncertain Significance				11.79								5990551	80
1	24294451	24294451	p36.11	A		Deletion	Intronic; 3'UTR	SRSF10	ENST00000453840.7; NM_001300937.2; NM_001191007.3; NM_001191006.3; ENST00000484146.6; ENST00000374452.9; NM_001300936.2; NM_001191005.3; NM_001191009.3; ENST00000492112.3; NM_006625.6; NM_054016.4; NR_034035.3; ENST00000344989.10	c.594-238delT; c.*3181delT; n.961-238delT; c.489-5delT; c.492-5delT; c.438-238delT; c.489-238delT; c.492-238delT			Uncertain Significance				7.359
1	24385441	24385441	p36.11	C	T	SNV	Exonic	MYOM3	NM_152372.4; ENST00000338909.9; ENST00000374434.4	c.4023G>A; c.702G>A	p.P234P; p.P1341P	synonymous	Uncertain Significance				< 10	140240337	0.085
1	24402675	24402675	p36.11	T	G	SNV	Exonic	MYOM3	NM_152372.4; ENST00000374434.4	c.2675A>C	p.D892A	missense	Uncertain Significance	Damaging	0.02	Possibly Damaging	24.3	36077733	0.34
1	24416550	24416550	p36.11	C	T	SNV	Intronic	MYOM3	NM_152372.4; ENST00000374434.4	c.1486+5G>A			Uncertain Significance				< 10	187599846	0.024
1	24418697	24418697	p36.11	C	T	SNV	Exonic	MYOM3	NM_152372.4; ENST00000374434.4	c.1199G>A	p.R400Q	missense	Uncertain Significance	Tolerated	0.35	Possibly Damaging	24.8	201180005	0.016						9921524	33.33
1	24419486	24419486	p36.11	C	T	SNV	Exonic	MYOM3	NM_152372.4; ENST00000374434.4	c.1041G>A	p.V347V	synonymous	Uncertain Significance				< 10	373848788	0.01
1	24460721	24460721	p36.11	C	A	SNV	Exonic	IL22RA1	NM_021258.4; ENST00000270800.2	c.511G>T	p.V171F	missense	Uncertain Significance			Possibly Damaging	17.8	147757191	0.115
1	24496050	24496050	p36.11	G	A	SNV	Exonic	IFNLR1	NM_173065.3; ENST00000327535.6; NM_170743.4; ENST00000374421.7; ENST00000374418.3; NM_173064.3; ENST00000327575.6	c.224C>T	p.A75V	missense	Uncertain Significance	Tolerated	0.26	Benign	12.64	115773768	0.162
1	24718076	24718076	p36.11	T	G	SNV	Exonic; 5'UTR; Intronic	STPG1	NM_001199014.2; ENST00000374409.5; NM_001199013.2; NM_178122.5; NM_001199012.2	c.-113A>C; c.164A>C; c.49-7583A>C	p.Q55P	missense	Uncertain Significance	Tolerated	0.06		25.4	1322513903	0.001
1	24977909	24977909	p36.11	C	G	SNV	Exonic; ncRNA; Intronic	SRRM1	NR_159388.1; ENST00000323848.14; NM_001366577.1; NM_001366598.1; NM_001366569.1; NM_001366581.1; NM_001366575.1; NM_005839.4; NM_001366596.1; NM_001366567.1; NM_001366573.1; NM_001366588.1; NR_159383.1; NR_159391.1; NM_001366565.1; NM_001366600.1; NR_159385.1; NM_001366594.1; NM_001303449.1; NM_001366592.1; NM_001366586.1; NM_001366571.1; NR_159379.1; NM_001366578.1; NR_159387.1; NM_001366599.1; …	c.531C>G; n.547-81C>G; n.655-81C>G; c.273-81C>G; n.2327-81C>G; n.556C>G; c.522-81C>G; n.2336C>G; n.686C>G; n.2625C>G; c.405-81C>G; c.282C>G; c.414C>G	p.S94S; p.S138S; p.S177S	synonymous	Uncertain Significance				12.45	150997937	0.016
1	24987299	24987299	p36.11	G	T	SNV	Intronic	SRRM1	NR_159388.1; ENST00000323848.14; NM_001366577.1; NM_001366598.1; NM_001366569.1; NM_001366581.1; NM_001366575.1; NM_005839.4; NM_001366596.1; NM_001366567.1; NM_001366573.1; NM_001366588.1; NR_159383.1; NR_159391.1; NM_001366565.1; NM_001366600.1; NR_159385.1; NM_001366594.1; NM_001303449.1; NM_001366592.1; NM_001366586.1; NM_001366571.1; NR_159379.1; NM_001366578.1; NR_159387.1; NM_001366599.1; …	n.3143+9G>T; n.1590+9G>T; n.1471+9G>T; n.3234+9G>T; c.1147+9G>T; c.1189+9G>T; n.1369+9G>T; c.1141+9G>T; c.1306+9G>T; n.3233+9G>T; n.1589+9G>T; n.3239+9G>T; c.1300+9G>T; c.1273+9G>T; n.1402+9G>T; c.1279+9G>T; n.3528+9G>T; c.1057+9G>T; c.1390+9G>T; n.1459+9G>T; c.1396+9G>T			Uncertain Significance				13.76	145732567	0.762
1	24995826	24995826	p36.11	G	T	SNV	Exonic; ncRNA	SRRM1	NR_159388.1; ENST00000323848.14; NM_001366577.1; NM_001366598.1; NM_001366569.1; NM_001366581.1; NM_001366575.1; NM_005839.4; NM_001366596.1; NM_001366567.1; NM_001366573.1; NM_001366588.1; NR_159383.1; NR_159391.1; NM_001366565.1; NM_001366600.1; NR_159385.1; NM_001366594.1; NM_001303449.1; NM_001366592.1; NM_001366586.1; NM_001366571.1; NR_159379.1; NM_001366578.1; NR_159387.1; NM_001366599.1; …	c.1739G>T; c.1787G>T; c.1745G>T; c.1613G>T; c.1877G>T; c.1655G>T; c.1898G>T; n.3837G>T; c.1697G>T; n.3795G>T; n.2066G>T; c.1946G>T; c.1994G>T; n.1967G>T; n.3741G>T; c.1856G>T; c.1988G>T; c.1904G>T; n.2188G>T; c.1703G>T; c.1871G>T; n.3789G>T; c.1742G>T; n.4126G>T; n.2000G>T; n.3832G>T; c.1952G>T; c.1736G>T; c.1991G>T; n.2015G>T; c.1652G>T; c.1901G>T; c.1700G>T; c.1943G>T; c.1985G>T; n.2187G>T; n.2…	p.R580I; p.R635I; p.R633I; p.R568I; p.R538I; p.R649I; p.R582I; p.R566I; p.R665I; p.R651I; p.R596I; p.R552I; p.R663I; p.R619I; p.R624I; p.R567I; p.R634I; p.R579I; p.R626I; p.R648I; p.R650I; p.R551I; p.R581I; p.R664I; p.R662I	missense	Uncertain Significance	Damaging	0.03	Possibly Damaging	29.2	144308305	0.02
1	24995827	24995827	p36.11	A	C	SNV	Exonic; ncRNA	SRRM1	NR_159388.1; ENST00000323848.14; NM_001366577.1; NM_001366598.1; NM_001366569.1; NM_001366581.1; NM_001366575.1; NM_005839.4; NM_001366596.1; NM_001366567.1; NM_001366573.1; NM_001366588.1; NR_159383.1; NR_159391.1; NM_001366565.1; NM_001366600.1; NR_159385.1; NM_001366594.1; NM_001303449.1; NM_001366592.1; NM_001366586.1; NM_001366571.1; NR_159379.1; NM_001366578.1; NR_159387.1; NM_001366599.1; …	c.1857A>C; c.1989A>C; c.1704A>C; n.2188A>C; n.2058A>C; n.3838A>C; c.1947A>C; c.1995A>C; n.2016A>C; n.3833A>C; c.1740A>C; c.1872A>C; c.1698A>C; n.1968A>C; c.1746A>C; c.1614A>C; c.1878A>C; c.1950A>C; c.1788A>C; c.1656A>C; n.4127A>C; n.2001A>C; c.1899A>C; c.1701A>C; c.1986A>C; n.2189A>C; c.1944A>C; c.1992A>C; c.1905A>C; n.3742A>C; c.1902A>C; c.1953A>C; c.1737A>C; n.3796A>C; n.2067A>C; n.3790A>C; c.1…	p.R651S; p.R596S; p.R552S; p.R663S; p.R633S; p.R568S; p.R566S; p.R665S; p.R582S; p.R580S; p.R538S; p.R649S; p.R635S; p.R619S; p.R662S; p.R650S; p.R551S; p.R567S; p.R634S; p.R579S; p.R664S; p.R581S; p.R626S; p.R648S; p.R624S	missense	Uncertain Significance	Tolerated	0.37	Benign	23.8	141233962	0.02
1	24998750	24998750	p36.11	G	A	SNV	Exonic; ncRNA	SRRM1	NR_159388.1; ENST00000323848.14; NM_001366577.1; NM_001366598.1; NM_001366569.1; NM_001366581.1; NM_001366575.1; NM_005839.4; NM_001366596.1; NM_001366567.1; NM_001366573.1; NR_159383.1; NM_001366588.1; NR_159391.1; NM_001366565.1; NM_001366600.1; NR_159385.1; NM_001366594.1; NM_001366592.1; NM_001303449.1; NM_001366586.1; NM_001366571.1; NR_159379.1; NM_001366578.1; NR_159387.1; NM_001366599.1; …	c.2724G>A; n.4568G>A; c.2688G>A; c.2640G>A; c.2388G>A; c.2634G>A; n.4862G>A; c.2613G>A; n.2924G>A; n.4477G>A; c.2523G>A; c.2433G>A; c.2349G>A; c.2607G>A; c.2439G>A; c.2475G>A; n.2793G>A; c.2391G>A; n.2802G>A; c.2637G>A; c.2685G>A; c.2481G>A; n.4525G>A; c.2727G>A; c.2721G>A; n.2703G>A; n.2923G>A; c.2436G>A; c.2592G>A; n.4531G>A; c.2679G>A; c.2682G>A; c.2730G>A; n.2736G>A; n.2751G>A; n.4573G>A; c.2…	p.R871R; p.R893R; p.R895R; p.R796R; p.R841R; p.R908R; p.R811R; p.R910R; p.R879R; p.R813R; p.R825R; p.R869R; p.R827R; p.R880R; p.R783R; p.R894R; p.R864R; p.R896R; p.R797R; p.R907R; p.R909R; p.R824R; p.R812R; p.R878R; p.R826R	synonymous	Uncertain Significance				12.05	61729117	0.133
1	25254204	25254204	p36.11	G	A	SNV	Exonic	RUNX3	NM_001031680.2; ENST00000308873.11; NM_001320672.1; NM_004350.3; ENST00000399916.5; ENST00000338888.3	c.300C>T; c.342C>T	p.D114D; p.D100D	synonymous	Likely Benign				10.81	114583699	0.198	RCV000964104.1
1	25291021	25291021	p36.11	C	G	SNV	Exonic	RUNX3	NM_001031680.2; NM_001320672.1; ENST00000399916.5; ENST00000338888.3	c.42G>C	p.S14S	synonymous	Uncertain Significance				< 10	143446859	0.089
1	25627529	25627529	p36.11	G	A	SNV	Exonic; Intronic	RHD; RSRP1	ENST00000568195.5; NM_001282868.1; ENST00000454452.6; ENST00000357542.8; NM_001282870.1; ENST00000417538.6; NR_135789.2; NR_135788.2; NM_001282867.1; ENST00000342055.9; NM_001127691.3; NM_001321772.2; NR_135787.2; NM_001282872.1; ENST00000423810.6; NM_001282869.2; ENST00000648012.1; ENST00000328664.9; NM_001282871.2	n.1215+36002C>T; c.-67+36002C>T; c.81G>A; n.277+36940C>T; c.579G>A	p.E193E; p.E27E	synonymous	Likely Benign				< 10	77813628	0.147
1	25628189	25628189	p36.11	G	A	SNV	Intronic	RHD; RSRP1	ENST00000357542.8; NM_001282868.1; ENST00000454452.6; ENST00000568195.5; NM_001282870.1; ENST00000417538.6; NR_135789.2; NR_135788.2; ENST00000342055.9; NM_001282867.1; NM_001127691.3; NM_001321772.2; NR_135787.2; NM_001282872.1; ENST00000423810.6; NM_001282869.2; ENST00000648012.1; ENST00000328664.9; NM_001282871.2	c.303+12G>A; n.1215+35342C>T; n.277+36280C>T; c.801+12G>A; c.-67+35342C>T			Uncertain Significance				10.76	144465944	0.19
1	25712250	25712250	p36.11	G	A	SNV	Exonic; Intronic	RHCE	ENST00000294413.13; ENST00000340849.8; NM_138618.6; ENST00000349438.8; NM_001330430.4; NM_138616.5; ENST00000346452.8; ENST00000349320.7; ENST00000413854.5; NM_138617.5	c.977C>T; c.572C>T; c.710C>T; c.1025C>T; c.939+3217C>T	p.T326I; p.T237I; p.T191I; p.T342I	missense	Likely Benign			Benign	< 10	1053374	0.224	RCV000974034.1
1	26131655	26131656	p36.11		GAG	Insertion	Exonic	SELENON	NM_020451.3; NM_206926.2; ENST00000361547.7	c.436_438dupGAG; c.334_336dupGAG	p.E112dup; p.E146dup	in-frame	Likely Benign				16.45	141295085	0.256	RCV000082018.6; RCV001080989.2; RCV000194580.2
1	26227504	26227504	p36.11	A	G	SNV	Intronic; 3'UTR	STMN1	ENST00000399728.5; ENST00000426559.6; ENST00000455785.7; NM_203401.2; NM_001145454.3; NM_203399.2; NM_005563.4; ENST00000374291.5; ENST00000357865.6	c.*3T>C; c.378+478T>C			Uncertain Significance				16.93	143302902	0.24
1	26371679	26371679	p36.11	C	T	SNV	Exonic	SLC30A2	ENST00000374278.7; ENST00000374276.4; NM_032513.5; NM_001004434.3	c.80G>A	p.G27E	missense	Uncertain Significance	Tolerated	1	Benign	< 10	77193883	0.055
1	26496491	26496491	p36.11	G	A	SNV	Promoter; Exonic; 3'UTR	AL391650.1; ZNF593; C1orf232	ENST00000374266.7; ENST00000448923.2; ENST00000270812.6; NM_001364667.1; NM_001364669.2; NM_015871.5; ENST00000635463.1	c.17G>A; c.*632C>T; c.-1501C>T	p.R6Q	missense	Uncertain Significance	Tolerated	0.28	Benign	23.7	2232649	0.197
1	26515307	26515307	p36.11	C	A	SNV	Promoter; Exonic	CNKSR1; CATSPER4	ENST00000361530.11; NM_006314.3; ENST00000456354.7; NM_001297648.2; NM_198137.2; ENST00000374253.9; NM_001297647.2	c.1756C>A; c.961C>A; c.1735C>A; c.-1812C>A	p.Q579K; p.Q321K; p.Q586K	missense	Likely Benign	Tolerated	0.18	Probably Damaging	23.8	75286440	0.258	RCV000967910.1
1	26515416	26515416	p36.11	G	A	SNV	Promoter; Exonic	CNKSR1; CATSPER4	ENST00000361530.11; NM_006314.3; ENST00000456354.7; NM_001297648.2; NM_198137.2; ENST00000374253.9; NM_001297647.2	c.1844G>A; c.1070G>A; c.1865G>A; c.-1703G>A	p.R357H; p.R622H; p.R615H	missense	Likely Benign	Tolerated	0.36	Benign	19.09	61762998	0.277	RCV000892781.2
1	26524556	26524556	p36.11	C	T	SNV	Exonic	CATSPER4	ENST00000456354.7; NM_198137.2	c.666C>T	p.L222L	synonymous	Likely Benign				10.3	17163655	0.173
1	26527325	26527325	p36.11	G	A	SNV	Exonic	CATSPER4	ENST00000456354.7; NM_198137.2	c.992G>A	p.G331D	missense	Likely Benign			Benign	< 10	80228909	0.275
1	26527941	26527941	p36.11	G	A	SNV	Exonic	CATSPER4	ENST00000456354.7; NM_198137.2	c.1296G>A	p.T432T	synonymous	Likely Benign				< 10	114575246	0.273
1	26607563	26607563	p36.11	C	T	SNV	Exonic; 3'UTR	SH3BGRL3	NM_031286.4; ENST00000319041.6; ENST00000270792.10	c.231C>T; c.*89C>T	p.F77F	synonymous	Uncertain Significance				13.01	144978776	0.066
1	26608889	26608889	p36.11	A	T	SNV	Exonic	UBXN11	ENST00000314675.11; NM_001389559.1; ENST00000374217.6; ENST00000374221.7; NM_183008.3; NM_001389556.1; ENST00000374223.5; NM_001077262.2; NM_145345.3	c.1104T>A; c.1464T>A; c.1365T>A; c.735T>A	p.G368G; p.G455G; p.G488G; p.G245G	synonymous	Likely Benign				< 10	202239787	0.122
1	26609355	26609356	p36.11	CT		Deletion	Exonic	UBXN11	ENST00000314675.11; NM_001389559.1; ENST00000374221.7; ENST00000374217.6; NM_183008.3; NM_001389556.1; ENST00000374223.5; NM_001077262.2; NM_145345.3	c.1051_1052delAG; c.421_422delAG; c.790_791delAG; c.1150_1151delAG	p.R351fs*20; p.R384fs*20; p.R141fs*20; p.R264fs*20	frameshift	Uncertain Significance				35	571526240	0.118
1	26610971	26610971	p36.11	C	T	SNV	Exonic	UBXN11	ENST00000314675.11; NM_001389559.1; ENST00000374217.6; ENST00000374221.7; NM_183008.3; NM_001389556.1; ENST00000374223.5; NM_001077262.2; NM_145345.3	c.126G>A; c.855G>A; c.495G>A; c.756G>A	p.V252V; p.V285V; p.V165V; p.V42V	synonymous	Uncertain Significance				14.22	116790691	0.197
1	26624486	26624486	p36.11	C	T	SNV	Exonic; Intronic; 5'UTR	UBXN11	NM_001389559.1; ENST00000314675.11; ENST00000374221.7; ENST00000374217.6; NM_183008.3; NM_001389556.1; ENST00000374223.5; NM_001077262.2; NM_145345.3	c.168G>A; c.-336G>A; c.199+2931G>A; c.267G>A	p.Q56Q; p.Q89Q	synonymous	Uncertain Significance				11.64	34916795	0.221
1	26648480	26648480	p36.11	G	C	SNV	Exonic	CRYBG2	NM_001039775.4	c.4965C>G	p.I1655M	missense	Uncertain Significance				22.4	75878406	0.113
1	26648765	26648765	p36.11	G	A	SNV	Exonic	CRYBG2	NM_001039775.4	c.4787C>T	p.S1596F	missense	Uncertain Significance				30	1309085329	0.001
1	26655266	26655266	p36.11	G	C	SNV	Exonic	CRYBG2	NM_001039775.4	c.4413C>G	p.G1471G	synonymous	Uncertain Significance				12.19	150602858	0.118
1	26663416	26663416	p36.11	C	T	SNV	Exonic	CRYBG2	NM_001039775.4	c.3827G>A	p.G1276D	missense	Uncertain Significance				18.88	150549145	0.018
1	26671658	26671658	p36.11	G	A	SNV	Exonic	CRYBG2	NM_001039775.4	c.1491C>T	p.V497V	synonymous	Likely Benign				< 10	111981367	0.417
1	26671690	26671690	p36.11	A	G	SNV	Exonic	CRYBG2	NM_001039775.4	c.1459T>C	p.S487P	missense	Likely Benign				< 10	112674559	0.982
1	26672364	26672364	p36.11	C	T	SNV	Exonic	CRYBG2	NM_001039775.4	c.785G>A	p.R262K	missense	Likely Benign	Tolerated	0.68		< 10	6678347	0.352
1	26688208	26688208	p36.11	T	A	SNV	Exonic	ZNF683	NM_001114759.3; NM_001307925.1; ENST00000349618.8; NM_173574.3; ENST00000403843.5	c.1509A>T; c.1449A>T	p.K503N; p.K483N	missense	Uncertain Significance			Possibly Damaging	15.02	36040832	0.259
1	26691637	26691637	p36.11	G	C	SNV	Exonic	ZNF683	NM_001114759.3; NM_001307925.1; ENST00000349618.8; NM_173574.3; ENST00000403843.5	c.400C>G	p.L134V	missense	Uncertain Significance	Tolerated	0.27	Benign	15.23	74061129	0.009
1	26899738	26899738	p36.11	C	T	SNV	Exonic	RPS6KA1	ENST00000374168.7; NM_001330441.2; ENST00000531382.5; NM_002953.4; NM_001006665.2	c.1971C>T; c.1923C>T; c.1998C>T	p.H657H; p.H666H; p.H641H	synonymous	Likely Benign				< 10	80024567	0.257
1	27101320	27101320	p36.11	C	G	SNV	Intronic; Exonic	ARID1A	ENST00000324856.13; NM_139135.4; NM_006015.6	c.4602C>G; c.4102-151C>G	p.H1534Q	missense	Uncertain Significance	Tolerated	0.13	Benign	16.1
1	27102075	27102075	p36.11	G	A	SNV	Exonic	ARID1A	ENST00000324856.13; NM_139135.4; NM_006015.6	c.5001G>A; c.4350G>A	p.P1450P; p.P1667P	synonymous	Likely Benign				12.13	116540923	0.127	RCV000884379.2; RCV000114253.2
1	27117328	27117328	p36.11	C	T	SNV	Exonic; Intronic; ncRNA	PIGV	NM_001374486.1; NM_001202554.2; NM_001374482.1; ENST00000374145.6; NM_001374485.1; ENST00000674273.1; ENST00000674335.1; ENST00000431541.6; NM_001374481.1; ENST00000078527.9; NM_001374484.1; NM_001374478.1; NR_164652.1; NM_017837.4; ENST00000674222.1; NM_001374480.1; NM_001374483.1; ENST00000674202.1; NR_164651.1	n.398C>T; c.-304+3031C>T; c.22C>T; n.520C>T	p.R8W	missense	Uncertain Significance	Tolerated	0.06	Benign	21.7	769363441	0.001						9707876	1.47
1	27121261	27121261	p36.11	T		Deletion	Exonic; Intronic; ncRNA	PIGV	ENST00000674202.1; NM_001202554.2; NM_001374482.1; ENST00000374145.6; NM_001374485.1; ENST00000674335.1; ENST00000674273.1; ENST00000431541.6; NM_001374481.1; NM_001374484.1; NR_164652.1; ENST00000078527.9; NM_001374478.1; ENST00000674222.1; NM_017837.4; NM_001374480.1; NM_001374483.1; NM_001374486.1; NR_164651.1	n.1235delT; n.615+498delT; c.79-2792delT; c.356delT; c.173-63delT; c.737delT	p.F119fs*34; p.F246fs*34	frameshift	Uncertain Significance
1	27206252	27206252	p36.11	T	G	SNV	Intronic	GPN2	NM_018066.4; ENST00000374135.9	c.861-12A>C			Likely Benign				< 10	114229330	0.23
1	27220873	27220873	p36.11	C	A	SNV	Exonic	GPATCH3	ENST00000361720.10; NM_022078.3	c.905G>T	p.R302L	missense	Uncertain Significance	Damaging	0	Probably Damaging	26.6	143131895	0.042
1	27240093	27240093	p36.11	C	T	SNV	Exonic	NR0B2	ENST00000254227.4; NM_021969.3	c.339G>A	p.P113P	synonymous	Uncertain Significance				< 10	143133224	0.095
1	27277253	27277253	p36.11	G	A	SNV	Intronic	KDF1	ENST00000616918.1; NM_152365.3; ENST00000320567.6	c.*298-6C>T; c.1040-6C>T			Uncertain Significance				11.63	150374655	0.191	RCV000963414.2
1	27426987	27426987	p36.11	C	T	SNV	ncRNA; Exonic	SLC9A1	NR_046474.2; ENST00000263980.8; NM_003047.5	n.2589G>A; c.2259G>A	p.E753E	synonymous	Uncertain Significance				< 10	147966767	0.035
1	27428886	27428886	p36.11	C	T	SNV	ncRNA; Exonic	SLC9A1	NR_046474.2; ENST00000263980.8; NM_003047.5	n.2140G>A; c.1810G>A	p.V604I	missense	Uncertain Significance	Tolerated	0.52	Benign	22.8	756862044	0.001						5705393	1.23
1	27440540	27440540	p36.11	G	A	SNV	Intronic; Exonic	SLC9A1	ENST00000374086.3; NR_046474.2; ENST00000263980.8; NM_003047.5	c.590C>T; n.1144-4272C>T	p.T197M	missense	Uncertain Significance	Damaging	0	Probably Damaging	23.4	1205234900
1	27661952	27661952	p36.11	C	T	SNV	Exonic; ncRNA	TMEM222	NM_032125.3; NR_037577.2; NR_037576.2; ENST00000374076.9; ENST00000611517.4; ENST00000608611.5; NR_037580.2	n.663C>T; n.728C>T; c.523C>T; c.622C>T; n.816C>T	p.R208W; p.R175W	missense	Uncertain Significance			Probably Damaging	32	150461998	0.871
1	27679805	27679805	p36.11	C	T	SNV	Exonic	SYTL1	NM_001193308.2; ENST00000543823.1; NM_032872.3; ENST00000318074.9; ENST00000616558.5	c.1339C>T; c.1375C>T	p.R459C; p.R447C	missense	Uncertain Significance	Damaging	0.05	Probably Damaging	25.8	200249506	0.018
1	27736223	27736223	p36.11	G	A	SNV	Intronic; Exonic	WASF2	ENST00000536657.1; NM_001201404.3; NM_006990.5; ENST00000618852.5	c.825-1383C>T; c.1302C>T	p.S434S	synonymous	Uncertain Significance				< 10	148612565	0.064
1	27874606	27874606	p36.11	A	C	SNV	Exonic	AHDC1	ENST00000642416.1; NM_001029882.3; ENST00000673934.1; ENST00000644989.1; NM_001371928.1; ENST00000642245.1	c.4021T>G	p.C1341G	missense	Uncertain Significance	Tolerated	0.21	Probably Damaging	24.9	111941243	0.061	RCV000883642.2
1	27875353	27875355	p36.11	AGG		Deletion	Exonic	AHDC1	ENST00000642416.1; NM_001029882.3; ENST00000673934.1; ENST00000644989.1; NM_001371928.1; ENST00000642245.1	c.3272_3274delCCT	p.S1091del	in-frame	Uncertain Significance				21.8		0.105	RCV000954364.3; RCV000986285.2					5284720	0.23
1	28056791	28056791	p35.3	A	C	SNV	Exonic; Intronic	FAM76A	ENST00000234549.11; NM_152660.3; NM_001143915.2; ENST00000419687.6; ENST00000373949.5; NM_001143914.2; NM_001143913.2; ENST00000373954.11; NM_001143912.2; ENST00000010299.10; ENST00000530324.5	c.195A>C; c.147-2323A>C	p.P65P	synonymous	Likely Benign				< 10	185534667	0.023
1	28208906	28208906	p35.3	C	T	SNV	Exonic; Intronic	THEMIS2	NM_001039477.3; NM_001286115.2; ENST00000373927.7; ENST00000328928.11; NM_001105556.3; NM_004848.4; NM_001286113.2; ENST00000373925.5	c.236-2900C>T; c.1071C>T; c.802-118C>T; c.646+2341C>T; c.556-73C>T	p.G357G	synonymous	Uncertain Significance				< 10	771433067	0.004
1	28209266	28209266	p35.3	G	A	SNV	Exonic; Intronic	THEMIS2	NM_001039477.3; NM_001286115.2; ENST00000373927.7; ENST00000328928.11; NM_001105556.3; NM_004848.4; NM_001286113.2; ENST00000373925.5	c.647-2540G>A; c.843G>A; c.236-2540G>A; c.1044G>A; c.1431G>A	p.L281L; p.L348L; p.L477L	synonymous	Likely Benign				< 10	78487802	0.189
1	28261682	28261682	p35.3	G	T	SNV	5'UTR	SMPDL3B	NM_014474.4; NM_001009568.3; ENST00000373888.8; NM_001304579.2; ENST00000373894.8	c.-702G>T; c.-13G>T			Uncertain Significance				14.45	145465203	0.106
1	28303813	28303813	p35.3	T	G	SNV	Exonic; Intronic	EYA3	ENST00000373871.8; NM_001282562.2; ENST00000436342.6; NM_001282561.2; NM_001990.4; ENST00000373863.3; NM_001282560.2; ENST00000540618.5	c.1641+1072A>C; c.1591A>C; c.1482+1072A>C; c.1503+1072A>C	p.S531R	missense	Likely Benign				< 10	145843271	0.124
1	28477451	28477451	p35.3	G	A	SNV	Exonic	PTAFR	NM_001164722.3; NM_000952.5; ENST00000539896.1; NM_001164723.3; ENST00000373857.8; NM_001164721.2; ENST00000305392.3	c.82C>T	p.L28F	missense	Uncertain Significance	Tolerated	0.11	Benign	20.9	116552042	0.069
1	28530330	28530330	p35.3	T	C	SNV	ncRNA; Exonic	DNAJC8	NM_014280.3; NR_159454.1; ENST00000263697.6	n.720A>G; c.567A>G	p.K189K	synonymous	Uncertain Significance				11.01	1292803597	0.002
1	28600574	28600574	p35.3	C	T	SNV	Exonic	SESN2	NM_031459.5; ENST00000253063.4	c.925C>T	p.H309Y	missense	Likely Benign	Tolerated	0.38	Benign	21.6	114922467	0.25	RCV000961268.1
1	28862454	28862454	p35.3	G	A	SNV	Exonic	RCC1	NM_001381865.2; ENST00000373833.10; ENST00000373831.7; NM_001269.6; ENST00000373832.5; ENST00000649185.1; NM_001381866.2; NM_001048199.3; NM_001048195.4; NM_001048194.4	c.826G>A; c.784G>A; c.733G>A	p.A245T; p.A276T; p.A262T	missense	Uncertain Significance	Tolerated	0.22	Benign	22.9	113449876	0.18
1	29064158	29064158	p35.3	C	T	SNV	Intronic	YTHDF2	NM_016258.3; NM_001172828.2; NM_001173128.2; ENST00000541996.5; ENST00000373812.8	c.28-12C>T; c.-99+499C>T			Uncertain Significance				16.52	199498914	0.004
1	29314121	29314121	p35.3	G	A	SNV	Exonic; 5'UTR	EPB41	ENST00000643604.1; NM_001376019.1; NM_203342.3; NM_001376025.1; NM_004437.4; NM_203343.3; ENST00000646189.1; NM_001376026.1; NM_001376017.1; NM_001376023.1; NM_001376016.1; ENST00000648181.1; ENST00000647103.1; NM_001376018.1; ENST00000642937.2; NM_001376024.1; NM_001376021.1; ENST00000373797.2; NM_001376015.1; ENST00000649717.1; ENST00000349460.9; NM_001166005.2; ENST00000347529.7; ENST000006443…	c.172G>A; c.-456G>A; c.-536G>A	p.G58R	missense	Uncertain Significance	Tolerated	0.13	Possibly Damaging	25.9	144499540	0.021
1	29314212	29314212	p35.3	A	G	SNV	Exonic; 5'UTR	EPB41	ENST00000643604.1; NM_001376019.1; NM_203342.3; NM_001376025.1; NM_004437.4; NM_203343.3; ENST00000646189.1; NM_001376026.1; NM_001376017.1; NM_001376023.1; NM_001376016.1; ENST00000648181.1; ENST00000647103.1; NM_001376018.1; ENST00000642937.2; NM_001376024.1; NM_001376021.1; ENST00000373797.2; NM_001376015.1; ENST00000649717.1; ENST00000349460.9; NM_001166005.2; ENST00000347529.7; ENST000006443…	c.-445A>G; c.-365A>G; c.263A>G	p.K88R	missense	Uncertain Significance	Tolerated	0.09	Benign	21.4	141680585	0.038
1	29359730	29359730	p35.3	C	T	SNV	Exonic	EPB41	ENST00000643604.1; NM_001376019.1; NM_203342.3; NM_001376025.1; NM_004437.4; NM_203343.3; ENST00000646189.1; NM_001376026.1; NM_001376017.1; NM_001376023.1; ENST00000648181.1; NM_001376016.1; ENST00000647103.1; NM_001376018.1; ENST00000642937.2; NM_001376024.1; ENST00000373797.2; NM_001376021.1; NM_001376015.1; ENST00000649717.1; ENST00000349460.9; NM_001166005.2; ENST00000347529.7; ENST000006443…	c.1338C>T; c.711C>T; c.1233C>T; c.1020C>T; c.1125C>T	p.S446S; p.S375S; p.S237S; p.S411S; p.S340S	synonymous	Uncertain Significance				12.51
1	29447639	29447639	p35.3	G	A	SNV	Exonic	TMEM200B	NM_001003682.4; NM_001171868.2; ENST00000420504.2; ENST00000521452.2	c.702C>T	p.P234P	synonymous	Uncertain Significance				10.89	139281750	0.041
1	29447663	29447663	p35.3	C	T	SNV	Exonic	TMEM200B	NM_001003682.4; NM_001171868.2; ENST00000420504.2; ENST00000521452.2	c.678G>A	p.L226L	synonymous	Uncertain Significance				10.71	140493221	0.021
1	29475312	29475312	p35.3	G	A	SNV	Exonic	SRSF4	ENST00000373795.7; NM_005626.5	c.1095C>T	p.R365R	synonymous	Uncertain Significance				< 10	145166993	0.055
1	29527085	29527085	p35.3	C	A	SNV	Exonic; ncRNA	MECR	NM_001349715.2; ENST00000263702.11; NM_001349714.2; NR_146213.2; NM_001349716.2; ENST00000373791.7; NM_001349711.2; NR_146212.2; NR_146214.2; NM_001349717.2; NM_001349712.2; NM_016011.5; NR_146215.2; NM_001024732.4; NM_001349713.2	c.623G>T; n.928G>T; n.1054G>T; c.773G>T; c.857G>T; c.545G>T; c.878G>T; n.801G>T	p.R286L; p.R208L; p.R182L; p.R293L; p.R258L	missense	Likely Benign	Damaging	0.04	Benign	24.4	34835902	0.121	RCV000894291.2	250195
1	29533289	29533289	p35.3	C	T	SNV	Exonic; ncRNA	MECR	NM_001349715.2; ENST00000263702.11; NM_001349714.2; NR_146213.2; NM_001349716.2; ENST00000373791.7; NM_001349711.2; NR_146212.2; NR_146214.2; NM_001349717.2; NM_001349712.2; NM_016011.5; NR_146215.2; NM_001024732.4; NM_001349713.2	c.619G>A; n.690G>A; c.307G>A; c.535G>A; n.563G>A; n.774G>A; c.385G>A; c.640G>A	p.E214K; p.E103K; p.E179K; p.E207K; p.E129K	missense	Uncertain Significance	Tolerated	0.78	Benign	24.1	144073611	0.046	RCV000889503.1
1	29586018	29586018	p35.3	C	G	SNV	Exonic	PTPRU	ENST00000428026.6; ENST00000345512.7; NM_133177.4; ENST00000373779.8; NM_133178.4; NM_001195001.2; NM_005704.5; ENST00000460170.2	c.617C>G	p.A206G	missense	Uncertain Significance	Damaging	0.04	Benign	24	943968406	0
1	29618470	29618470	p35.3	A	G	SNV	Exonic	PTPRU	ENST00000428026.6; ENST00000345512.7; NM_133177.4; NM_133178.4; ENST00000373779.8; NM_001195001.2; NM_005704.5; ENST00000460170.2	c.2438A>G; c.2408A>G	p.Q803R; p.Q813R	missense	Uncertain Significance	Tolerated	0.75	Benign	22.8	150111261	0.064
1	29641914	29641914	p35.3	C	T	SNV	Exonic	PTPRU	ENST00000428026.6; ENST00000345512.7; NM_133177.4; NM_005704.5; ENST00000373779.8; NM_001195001.2; NM_133178.4; ENST00000460170.2	c.3288C>T; c.3276C>T; c.3249C>T; c.3258C>T	p.I1083I; p.I1092I; p.I1086I; p.I1096I	synonymous	Uncertain Significance				< 10	139267044	0.058
1	29641953	29641953	p35.3	C	T	SNV	Exonic	PTPRU	ENST00000428026.6; ENST00000345512.7; NM_133177.4; NM_005704.5; ENST00000373779.8; NM_001195001.2; NM_133178.4; ENST00000460170.2	c.3288C>T; c.3297C>T; c.3327C>T; c.3315C>T	p.G1096G; p.G1105G; p.G1099G; p.G1109G	synonymous	Likely Benign				< 10	34589663	0.251
1	29642654	29642654	p35.3	A	G	SNV	Exonic	PTPRU	ENST00000428026.6; ENST00000345512.7; NM_133177.4; ENST00000373779.8; NM_133178.4; NM_001195001.2; NM_005704.5; ENST00000460170.2	c.3495A>G; c.3504A>G; c.3534A>G; c.3522A>G	p.E1174E; p.E1165E; p.E1168E; p.E1178E	synonymous	Uncertain Significance				< 10	150485708	0.058
1	31189060	31189060	p35.2	G	A	SNV	Exonic	MATN1	NM_002379.3; ENST00000373765.5	c.903C>T	p.I301I	synonymous	Likely Benign				< 10	34163530	0.248	RCV000965546.1
1	31189665	31189665	p35.2	A	C	SNV	Promoter; Exonic	MATN1; MATN1-AS1	NR_034182.1; NM_002379.3; ENST00000373765.5	n.-1954A>C; c.762T>G	p.T254T	synonymous	Uncertain Significance				< 10	149126079	0.046
1	31194539	31194539	p35.2	C	T	SNV	ncRNA; Exonic	MATN1; MATN1-AS1	NR_034182.1; NM_002379.3; ENST00000373765.5	c.154G>A; n.1199C>T	p.V52I	missense	Uncertain Significance	Tolerated	0.14	Probably Damaging	23.7	140983667	0.072	RCV000902037.1
1	31501691	31501691	p35.2	C	G	SNV	Exonic	PUM1	NM_001020658.2; ENST00000426105.7; ENST00000440538.6; ENST00000373742.6; ENST00000373741.8; NM_014676.3; ENST00000257075.9	c.384G>C; c.492G>C	p.L128L; p.L164L	synonymous	Uncertain Significance				11.12	112304138	0.118
1	31791054	31791054	p35.2	A	G	SNV	Exonic; Intronic	ZCCHC17	ENST00000373714.5; NM_001282568.2; NM_016505.4; NM_001282567.2; NM_001282573.2; NM_001282566.2; ENST00000344147.10; NM_001282572.2; ENST00000615916.4; ENST00000546109.5; NM_001282569.2; NM_001282571.2; NM_001282570.2; NM_001282574.2	c.133-902A>G; c.-19-902A>G; c.-6-902A>G; c.67-902A>G; c.13A>G	p.I5V	missense	Uncertain Significance				< 10	968381330	0.001
1	31907027	31907027	p35.2	G	A	SNV	Exonic	SERINC2	NM_018565.4; NM_001199037.2; ENST00000373709.8; ENST00000536859.5; NM_001199038.2; ENST00000373710.5; ENST00000536384.2; NM_001199039.2; NM_178865.5	c.1349G>A; c.1361G>A; c.1376G>A; c.1184G>A	p.R459H; p.R450H; p.R395H; p.R454H	missense	Uncertain Significance	Damaging	0.01		24.5	77828190	0.032
1	32149774	32149774	p35.2	C	T	SNV	Exonic	COL16A1	ENST00000373668.7; NM_001856.4	c.2219G>A	p.R740Q	missense	Uncertain Significance	Tolerated	0.64	Benign	< 10	369029210	0.014
1	32157610	32157610	p35.2	C	T	SNV	Exonic	COL16A1	ENST00000373668.7; NM_001856.4	c.1253G>A	p.R418Q	missense	Uncertain Significance	Tolerated	0.51	Probably Damaging	23.4	6699645	0.155
1	32158384	32158384	p35.2	G	A	SNV	Exonic	COL16A1	ENST00000373668.7; NM_001856.4	c.1097C>T	p.P366L	missense	Uncertain Significance	Tolerated	0.07	Benign	23.1	2229803	0.063
1	32162867	32162867	p35.2	G	A	SNV	Exonic	COL16A1	ENST00000373668.7; NM_001856.4	c.692C>T	p.P231L	missense	Uncertain Significance	Damaging	0.01	Probably Damaging	24.3	771977028	0.003						3664720	0.43
1	32164183	32164183	p35.2	C	T	SNV	Exonic	COL16A1	ENST00000373668.7; NM_001856.4	c.291G>A	p.P97P	synonymous	Uncertain Significance				< 10	2228551	0.046
1	32672713	32672713	p35.1	C	T	SNV	Promoter; Exonic	IQCC; DCDC2B	NM_001099434.2; NM_018134.3; ENST00000409358.1; ENST00000291358.11; NM_001160042.2; ENST00000537469.2	c.550C>T; c.790C>T; c.-1982C>T	p.R264C; p.R184C	missense	Uncertain Significance	Damaging	0	Probably Damaging	32	139065150	0.06
1	32674736	32674736	p35.1	C	T	SNV	Exonic	DCDC2B	NM_001099434.2; ENST00000409358.1	c.42C>T	p.Y14Y	synonymous	Uncertain Significance				< 10	370943891	0.041
1	32676873	32676873	p35.1	C	T	SNV	Exonic	DCDC2B	NM_001099434.2; ENST00000409358.1	c.267C>T	p.H89H	synonymous	Uncertain Significance				12.6	141330031	0.059
1	32677370	32677370	p35.1	C	T	SNV	Exonic	DCDC2B	NM_001099434.2; ENST00000409358.1	c.327C>T	p.P109P	synonymous	Likely Benign				< 10	182464428	0.038
1	32742311	32742311	p35.1	A	G	SNV	Exonic	LCK	ENST00000333070.4; NM_001330468.2; NM_001042771.3; ENST00000619559.4; NM_005356.5; ENST00000336890.10	c.735A>G; c.888A>G	p.Q296Q; p.Q245Q	synonymous	Likely Benign				10.56	35029770	0.211	RCV000652174.4
1	32797082	32797082	p35.1	A	G	SNV	Exonic	HDAC1	NM_004964.3; ENST00000373548.8	c.987A>G	p.P329P	synonymous	Uncertain Significance				10.35	77379902	0.089
1	32827444	32827444	p35.1	C	G	SNV	Promoter; Exonic	FAM229A; TSSK3	ENST00000373534.4; ENST00000432622.1; NM_001167676.1; NM_052841.4	c.-859C>G; c.168G>C	p.E56D	missense	Uncertain Significance				23.3	59293244	0.226
1	32829348	32829348	p35.1	G	A	SNV	Promoter; Exonic	FAM229A; TSSK3	ENST00000373534.4; ENST00000432622.1; NM_001167676.1; NM_052841.4	c.-1656C>T; c.298G>A	p.V100M	missense	Uncertain Significance	Damaging	0	Possibly Damaging	25.5	376401331	0.003
1	32829683	32829683	p35.1	C	T	SNV	Promoter; Exonic	FAM229A; TSSK3	ENST00000373534.4; ENST00000432622.1; NM_001167676.1; NM_052841.4	c.633C>T; c.-1991G>A	p.D211D	synonymous	Likely Benign				< 10	77486682	0.106
1	32937153	32937153	p35.1	G	A	SNV	Exonic	ZBTB8B	NM_001145720.2	c.928G>A	p.G310S	missense	Uncertain Significance	Tolerated	0.7	Benign	14.01	149856981	0.129
1	33099576	33099576	p35.1	G	C	SNV	Exonic; ncRNA; Intronic	ZBTB8OS	NR_158780.1; NR_158774.1; NM_001366258.1; NM_001366265.1; NM_001366270.1; NM_001308139.2; NR_158775.1; NM_001366257.1; NM_001366271.1; NM_001366264.1; NR_158776.1; NM_001366256.1; NR_158782.1; NR_158772.1; ENST00000468695.5; NM_001308136.2; ENST00000465588.2; NM_001366263.1; NM_178547.5; NR_158773.1; NR_158781.1; NM_001308137.2; NM_001308138.2; NM_001366255.1; NM_001366269.1; NM_001308140.2; NM_0…	n.689C>G; n.727C>G; c.256C>G; c.235C>G; c.158+793C>G; c.220C>G; n.501-248C>G; c.162+793C>G; c.49C>G; n.623C>G; n.667C>G; c.100C>G; c.133+16458C>G; n.598C>G; n.636C>G; n.284C>G; c.112C>G	p.Q17E; p.Q38E; p.Q86E; p.Q74E; p.Q79E; p.Q34E	missense	Uncertain Significance	Tolerated	1		17.46	148631428	0.003
1	33231392	33231392	p35.1	C	T	SNV	Exonic; Intronic	KIAA1522	NM_001369553.1; NM_001198973.2; ENST00000401073.7; ENST00000373480.1; NM_001198972.2; ENST00000373481.7; NM_020888.3; ENST00000294521.7	c.92-1996C>T; c.236-1996C>T; c.22C>T	p.R8C	missense	Uncertain Significance	Damaging	0.04		15.71	181736501	0.124
1	33235947	33235947	p35.1	A	C	SNV	Exonic; Intronic	KIAA1522	NM_001369553.1; NM_001198973.2; ENST00000401073.7; ENST00000373480.1; NM_001198972.2; ENST00000373481.7; NM_020888.3; ENST00000294521.7	c.990A>C; c.1023A>C; c.1167A>C; c.409+1571A>C	p.S341S; p.S330S; p.S389S	synonymous	Uncertain Significance				< 10	377389746	0.033
1	33237644	33237644	p35.1	C	T	SNV	Exonic; Intronic	KIAA1522	NM_001369553.1; NM_001198973.2; ENST00000401073.7; ENST00000373480.1; NM_001198972.2; ENST00000373481.7; NM_020888.3; ENST00000294521.7	c.410-822C>T; c.2687C>T; c.2720C>T; c.2864C>T	p.P896L; p.P907L; p.P955L	missense	Uncertain Significance	Damaging	0.03	Benign	17.52	745999932	0.004
1	33246707	33246707	p35.1	T	A	SNV	Exonic	YARS1	ENST00000675785.1; ENST00000373477.9; NM_003680.4	c.1082A>T; c.935A>T	p.E312V; p.E361V	missense	Likely Benign	Tolerated	0.3	Benign	24.7	61737106	0.103	RCV000614592.1; RCV000536824.5
1	33360412	33360412	p35.1	G	C	SNV	Exonic	TMEM54	ENST00000373463.8; NM_001329725.2; NM_001329722.2; NM_033504.4; NM_001329723.2; NM_001329724.2; ENST00000329151.5	c.717C>G; c.564C>G; c.603C>G; c.663C>G; c.504C>G	p.T168T; p.T221T; p.T239T; p.T188T; p.T201T	synonymous	Uncertain Significance				< 10	150537161	0.022
1	33415258	33415258	p35.1	G	A	SNV	Exonic	RNF19B	ENST00000356990.9; ENST00000235150.5; NM_001300826.2; NM_001127361.3; NM_153341.4; ENST00000373456.11	c.753C>T	p.C251C	synonymous	Uncertain Significance				11.85	113996980	0.059
1	33490091	33490091	p35.1	G	T	SNV	Exonic; Intronic; ncRNA	AK2	ENST00000467905.5; ENST00000373449.7; ENST00000354858.11; ENST00000487289.1; NM_001199199.3; NM_001319143.2; ENST00000673291.1; NR_134976.3; ENST00000672715.1; ENST00000480134.5; NM_013411.5; NM_001319140.2; NM_001625.4; NM_001319142.3; NM_001319139.3; ENST00000548033.5; NM_001319141.3	c.171C>A; c.27C>A; c.94-2787C>A; n.226C>A	p.G57G; p.G9G	synonymous	Uncertain Significance				11.77	61755973	0.009	RCV001466300.1; RCV000940039.1
1	33560206	33560206	p35.1	C	T	SNV	Exonic; ncRNA	AZIN2	NM_001301826.1; NM_001293562.2; ENST00000294517.11; NR_126031.1; NM_001376732.1; NM_001301824.2; NM_001350400.2; NM_052998.4; NR_146649.2; NM_001350398.2; ENST00000373443.7; NM_001376722.1; NM_001301823.2; ENST00000373441.1; NM_001350399.2; NR_146648.2; NM_001376727.1; NM_001350401.2; NM_001376729.1; NM_001376730.1; NM_001376724.1; NM_001350402.1; NM_001376725.1; NM_001301825.1	c.645C>T; n.1198C>T; c.192C>T; n.1014C>T; c.471C>T; n.754C>T; c.360C>T	p.D64D; p.D120D; p.D157D; p.D215D	synonymous	Likely Benign				< 10	144490487	0.127
1	33562316	33562316	p35.1	C	T	SNV	Exonic; ncRNA	AZIN2	NM_001301826.1; NM_001293562.2; ENST00000294517.11; NR_126031.1; NM_001376732.1; NM_001350400.2; NM_001301824.2; NM_052998.4; NR_146649.2; NM_001350398.2; ENST00000373443.7; NM_001376722.1; NM_001301823.2; ENST00000373441.1; NM_001350399.2; NR_146648.2; NM_001376727.1; NM_001350401.2; NM_001376729.1; NM_001376730.1; NM_001376724.1; NM_001376725.1; NM_001350402.1; NM_001301825.1	c.477C>T; n.1131C>T; n.871C>T; c.762C>T; c.309C>T; n.1315C>T; c.588C>T	p.S159S; p.S103S; p.S254S; p.S196S	synonymous	Uncertain Significance				10.61	115719263	0.061	RCV000970415.1
1	33562400	33562400	p35.1	C	T	SNV	Exonic; ncRNA	AZIN2	NM_001301826.1; NM_001293562.2; ENST00000294517.11; NR_126031.1; NM_001376732.1; NM_001350400.2; NM_001301824.2; NM_052998.4; NR_146649.2; NM_001350398.2; ENST00000373443.7; NM_001376722.1; NM_001301823.2; ENST00000373441.1; NM_001350399.2; NR_146648.2; NM_001376727.1; NM_001350401.2; NM_001376729.1; NM_001376730.1; NM_001376724.1; NM_001376725.1; NM_001350402.1; NM_001301825.1	c.561C>T; c.393C>T; n.1399C>T; c.672C>T; n.955C>T; c.846C>T; n.1215C>T	p.T224T; p.T282T; p.T131T; p.T187T	synonymous	Uncertain Significance				< 10	373883725	0.002
1	33613054	33613054	p35.1	G	A	SNV	Exonic	TRIM62	ENST00000543586.1; NM_018207.3; ENST00000291416.10; NM_001330483.2	c.789C>T; c.1152C>T	p.R263R; p.R384R	synonymous	Likely Benign				< 10	116317048	0.159
1	33613273	33613273	p35.1	C	T	SNV	Exonic	TRIM62	ENST00000543586.1; NM_018207.3; ENST00000291416.10; NM_001330483.2	c.570G>A; c.933G>A	p.S190S; p.S311S	synonymous	Likely Benign				< 10	76988009	0.124
1	33736228	33736228	p35.1	A	T	SNV	Intronic	ZNF362	NM_152493.3; NM_001370212.1; ENST00000373428.5	c.38+15A>T			Uncertain Significance				17.59	751487753	0
1	33772799	33772799	p35.1	G	T	SNV	Exonic	A3GALT2	NM_001080438.1	c.591C>A	p.C197*	stop gain	Uncertain Significance				38	11812052	0.201
1	33985177	33985177	p35.1	T	C	SNV	Exonic	CSMD2	ENST00000373381.8; NM_052896.5; NM_001281956.2; ENST00000373388.6	c.10837A>G; c.10405A>G	p.T3613A; p.T3469A	missense	Uncertain Significance	Tolerated	0.13	Possibly Damaging	23.6	115143061	0.127
1	34006180	34006180	p35.1	C	T	SNV	Exonic	CSMD2	ENST00000373381.8; NM_052896.5; NM_001281956.2; ENST00000373388.6	c.9144G>A; c.9576G>A	p.A3192A; p.A3048A	synonymous	Likely Benign				< 10	1532308	0.278
1	34006182	34006182	p35.1	C	T	SNV	Exonic	CSMD2	ENST00000373381.8; NM_052896.5; NM_001281956.2; ENST00000373388.6	c.9574G>A; c.9142G>A	p.A3192T; p.A3048T	missense	Uncertain Significance	Tolerated	0.13	Benign	22.2	149335630	0.015
1	34066506	34066506	p35.1	C	T	SNV	Exonic	CSMD2	ENST00000373380.5; ENST00000373381.8; ENST00000373377.1; NM_052896.5; NM_001281956.2; ENST00000373388.6	c.1112G>A; c.6815G>A; c.6821G>A; c.3434G>A	p.R2274H; p.R1145H; p.R371H; p.R2272H	missense	Uncertain Significance	Tolerated	0.06	Benign	20.1	141079785	0.124
1	34066556	34066556	p35.1	G	T	SNV	Exonic	CSMD2	ENST00000373380.5; ENST00000373381.8; ENST00000373377.1; NM_052896.5; NM_001281956.2; ENST00000373388.6	c.3384C>A; c.6765C>A; c.6771C>A; c.1062C>A	p.A2257A; p.A2255A; p.A1128A; p.A354A	synonymous	Uncertain Significance				< 10	146842383	0.046
1	34071506	34071506	p35.1	G	A	SNV	Exonic; Intronic	CSMD2	ENST00000373377.1; ENST00000373381.8; ENST00000373380.5; NM_052896.5; NM_001281956.2; ENST00000373388.6	c.6344-436C>T; c.6306C>T; c.641-436C>T; c.2963-436C>T	p.P2102P	synonymous	Likely Benign				< 10	139440321	0.013
1	34090137	34090137	p35.1	G	A	SNV	Exonic; 5'UTR	CSMD2	ENST00000373377.1; ENST00000373381.8; ENST00000373380.5; NM_052896.5; NM_001281956.2; ENST00000373388.6	c.5487C>T; c.-97C>T; c.2226C>T; c.5607C>T	p.P1829P; p.P742P; p.P1869P	synonymous	Likely Benign				< 10	35704335	0.152
1	34112291	34112291	p35.1	G	A	SNV	Exonic	CSMD2	ENST00000373381.8; ENST00000373380.5; NM_052896.5; NM_001281956.2; ENST00000373388.6	c.4731C>T; c.4611C>T; c.1350C>T	p.S1537S; p.S450S; p.S1577S	synonymous	Likely Benign				< 10	114829894	0.172
1	34330200	34330200	p35.1	C	G	SNV	Exonic; Intronic	CSMD2; HMGB4	NM_145205.6; ENST00000373381.8; NM_052896.5; NM_001281956.2; NM_001379301.1; ENST00000519684.5; NM_001352984.2; ENST00000373388.6	c.921-17603G>C; c.408C>G; c.801-17603G>C; c.186C>G	p.D136E; p.D62E	missense	Likely Benign	Tolerated	0.93	Benign	< 10	74067992	0.311
1	35223075	35223075	p34.3	C	T	SNV	Exonic	GJB5	NM_005268.4; ENST00000338513.1	c.144C>T	p.H48H	synonymous	Likely Benign				< 10	61750026	0.227
1	35250892	35250892	p34.3	T	G	SNV	Exonic	GJB3	ENST00000373362.3; ENST00000373366.3; NM_024009.3; NM_001005752.2	c.529T>G	p.Y177D	missense	Likely Benign	Damaging	0	Probably Damaging	24.9	80297119	0.19	RCV000338988.2; RCV000711805.2; RCV000155096.4
1	35251034	35251034	p34.3	G	A	SNV	Exonic	GJB3	ENST00000373362.3; ENST00000373366.3; NM_024009.3; NM_001005752.2	c.671G>A	p.R224Q	missense	Uncertain Significance	Tolerated	0.6	Benign	< 10	367983532	0.002
1	35260228	35260228	p34.3	G	A	SNV	Exonic	GJA4	NM_002060.3; ENST00000342280.5	c.414G>A	p.S138S	synonymous	Likely Benign				< 10	61737154	0.192
1	35351112	35351112	p34.3	C	T	SNV	Exonic	DLGAP3	NM_001080418.3; ENST00000235180.4	c.1881G>A	p.R627R	synonymous	Uncertain Significance				12.33	113637749	0.025	RCV000915626.1
1	35370053	35370053	p34.3	C	T	SNV	Exonic	DLGAP3	NM_001080418.3; ENST00000235180.4	c.932G>A	p.R311H	missense	Uncertain Significance	Damaging	0.05	Possibly Damaging	25.5	141061512	0.016
1	35370344	35370344	p34.3	G	T	SNV	Exonic	DLGAP3	NM_001080418.3; ENST00000235180.4	c.641C>A	p.P214Q	missense	Uncertain Significance	Tolerated	0.56	Benign	12.83	139478899	0.024
1	35447655	35447655	p34.3	G	A	SNV	Intronic; Exonic	AC114490.2; TMEM35B	ENST00000373337.3; NM_001195156.1; ENST00000417456.1	c.108+3144C>T; c.355C>T	p.L119L	synonymous	Likely Benign				< 10	115843213	0.16
1	35480467	35480467	p34.3	T	A	SNV	Exonic	ZMYM6	NM_007167.4; ENST00000357182.9	c.626A>T	p.Q209L	missense	Uncertain Significance	Damaging	0.01	Benign	23.3	756642386	0.002
1	35579678	35579678	p34.3	T	G	SNV	Exonic	ZMYM1	NM_001289088.2; ENST00000359858.9; NM_024772.5; NM_001289090.2; ENST00000650449.1; NM_001319955.2; NM_001289091.2; ENST00000611874.4; ENST00000373330.1; NM_001289089.2	c.2190T>G; c.2022T>G; c.2247T>G; c.1167T>G	p.F749L; p.F389L; p.F674L; p.F730L	missense	Likely Benign	Damaging	0.04	Benign	< 10	76780838	0.17
1	35734710	35734710	p34.3	G	C	SNV	Intronic	ZMYM4	NM_001350138.2; NM_001350140.2; ENST00000314607.11; NM_005095.3; NM_001350139.2; NM_001375653.1	c.-120+24G>C; c.39+24G>C; c.-1010+24G>C; c.48+15G>C; c.-241+24G>C			Uncertain Significance				17.63	549032510	0.006
1	36074906	36074906	p34.3	G	A	SNV	Exonic	PSMB2	NM_001199779.2; ENST00000373237.4; NM_001199780.2; NM_002794.5; ENST00000621781.4	c.38C>T; c.389C>T; c.314C>T	p.A105V; p.A130V; p.A13V	missense	Uncertain Significance	Damaging	0.04	Possibly Damaging	31	76784186	0.134
1	36181316	36181316	p34.3	C	G	SNV	Exonic	C1orf216	NM_001348691.2; ENST00000270815.5; NM_152374.2	c.607G>C	p.D203H	missense	Uncertain Significance	Damaging	0	Probably Damaging	28.5	147956029	0.033
1	36181502	36181502	p34.3	C	T	SNV	Exonic	C1orf216	NM_001348691.2; ENST00000270815.5; NM_152374.2	c.421G>A	p.D141N	missense	Uncertain Significance	Damaging	0.01	Benign	17.35	141737431	0.04
1	36181842	36181842	p34.3	G	A	SNV	Exonic	C1orf216	NM_001348691.2; ENST00000270815.5; NM_152374.2	c.81C>T	p.L27L	synonymous	Likely Benign				< 10	140271735	0.021
1	36226419	36226419	p34.3	G	A	SNV	Exonic	CLSPN	ENST00000520551.1; ENST00000373220.7; ENST00000251195.9; NM_001190481.2; NM_022111.4; NM_001330490.2; ENST00000318121.8	c.1103C>T	p.T368I	missense	Likely Benign	Tolerated	0.23	Benign	14.09	79928707	0.139
1	36226508	36226508	p34.3	T	C	SNV	Exonic	CLSPN	ENST00000520551.1; ENST00000373220.7; ENST00000251195.9; NM_001190481.2; NM_022111.4; NM_001330490.2; ENST00000318121.8	c.1014A>G	p.K338K	synonymous	Uncertain Significance				10.91	72902919	0.051	RCV000905063.1
1	36230135	36230135	p34.3	T	C	SNV	Exonic	CLSPN	ENST00000520551.1; ENST00000373220.7; ENST00000251195.9; NM_022111.4; NM_001190481.2; NM_001330490.2; ENST00000318121.8	c.314A>G	p.K105R	missense	Uncertain Significance	Tolerated	0.2	Possibly Damaging	19.01	112889391	0.002
1	36230196	36230196	p34.3	C	T	SNV	Exonic	CLSPN	ENST00000520551.1; ENST00000373220.7; ENST00000251195.9; NM_022111.4; NM_001190481.2; NM_001330490.2; ENST00000318121.8	c.253G>A	p.E85K	missense	Uncertain Significance	Tolerated	0.41	Probably Damaging	23.9	139161179	0.035
1	36306901	36306901	p34.3	C	T	SNV	ncRNA; Exonic	AGO4	ENST00000373210.4; NR_146062.2; NM_017629.4	c.1860C>T; n.1929C>T	p.T620T	synonymous	Likely Benign				< 10	142753498	0.291
1	36354185	36354185	p34.3	G	C	SNV	Exonic; 5'UTR	AGO1	NM_012199.5; ENST00000373204.6; ENST00000674426.1; ENST00000373206.5; NM_001317122.2; NM_001317123.2; ENST00000674304.1	c.-43G>C; c.183G>C	p.P61P	synonymous	Likely Benign				< 10	74665168	0.276	RCV000893538.2
1	36479252	36479252	p34.3	A	G	SNV	Exonic	AGO3	ENST00000246314.10; ENST00000373191.9; NM_177422.3; NM_024852.4	c.469A>G; c.1171A>G	p.T391A; p.T157A	missense	Uncertain Significance	Tolerated	0.81	Benign	18.35	201835772	0.008
1	36521340	36521340	p34.3	C	T	SNV	Exonic	AGO3	ENST00000246314.10; ENST00000373191.9; NM_177422.3; NM_024852.4	c.1875C>T; c.2577C>T	p.F625F; p.F859F	synonymous	Likely Benign				10.18	61743816	0.316	RCV000968520.2
1	36564145	36564145	p34.3	A	G	SNV	Exonic	COL8A2	NM_001294347.2; NM_005202.4; ENST00000303143.9; ENST00000481785.1	c.942T>C; c.1137T>C	p.G379G; p.G314G	synonymous	Likely Benign				< 10	77385288	0.186	RCV001546183.1
1	36564475	36564475	p34.3	C	T	SNV	Exonic	COL8A2	NM_001294347.2; NM_005202.4; ENST00000303143.9; ENST00000481785.1	c.612G>A; c.807G>A	p.V204V; p.V269V	synonymous	Likely Benign				< 10	140730816	0.136	RCV000967913.2
1	36785578	36785578	p34.3	C	T	SNV	Exonic	SH3D21	NM_001162530.2; NM_024676.5; ENST00000505871.7	c.1314C>T; c.981C>T	p.T438T; p.T327T	synonymous	Likely Benign				< 10	762170211	0.001
1	36785812	36785812	p34.3	G	A	SNV	Exonic	SH3D21	NM_001162530.2; NM_024676.5; ENST00000505871.7	c.1548G>A; c.1215G>A	p.K516K; p.K405K	synonymous	Likely Benign				< 10	143835882	0.019
1	36807464	36807464	p34.3	G	C	SNV	Exonic; 3'UTR	STK40	ENST00000373129.7; NM_001282547.2; ENST00000373132.4; ENST00000373130.7; ENST00000359297.6; NM_032017.3; NM_001282546.2	c.1215C>G; c.1200C>G; c.*1336C>G	p.P405P; p.P400P	synonymous	Likely Benign				< 10	148851878	0.222
1	36932135	36932135	p34.3	C	T	SNV	Exonic; Intronic	CSF3R	ENST00000373103.5; NM_156039.3; NM_172313.3; NM_000760.4; ENST00000373106.6; ENST00000361632.8; ENST00000373104.5	c.2247+87G>A; c.2415G>A; c.2334G>A	p.A805A; p.A778A	synonymous	Likely Benign				< 10	116118817	0.052	RCV000904714.3
1	36933493	36933493	p34.3	G	A	SNV	Exonic	CSF3R	ENST00000373103.5; NM_156039.3; NM_172313.3; NM_000760.4; ENST00000373106.6; ENST00000361632.8; ENST00000373104.5	c.1794C>T	p.I598I	synonymous	Likely Benign				< 10	3917998	0.302	RCV000503971.1; RCV000547268.5					1738020	4.08
1	36933715	36933715	p34.3	A	G	SNV	Exonic	CSF3R	ENST00000373103.5; NM_156039.3; NM_172313.3; NM_000760.4; ENST00000373106.6; ENST00000361632.8; ENST00000373104.5	c.1684T>C	p.Y562H	missense	Likely Benign	Damaging	0	Probably Damaging	26.5	3917996	0.235	RCV000545875.5; RCV000249800.1
1	36934823	36934823	p34.3	C	T	SNV	Exonic	CSF3R	ENST00000373103.5; NM_156039.3; NM_172313.3; NM_000760.4; ENST00000373106.6; ENST00000361632.8; ENST00000373104.5	c.1510G>A	p.V504M	missense	Uncertain Significance	Damaging	0	Probably Damaging	24.3	145256322	0.008	RCV000818224.1
1	37271792	37271792	p34.3	T	A	SNV	Exonic	GRIK3	ENST00000373093.4; ENST00000373091.8; NM_000831.4	c.2227A>T	p.I743F	missense	Uncertain Significance	Tolerated	0.07	Probably Damaging	28.4
1	37499626	37499626	p34.3	G	T	SNV	Exonic	GRIK3	ENST00000373093.4; NM_000831.4; ENST00000373091.8	c.84C>A	p.D28E	missense	Uncertain Significance	Tolerated	1	Benign	17.76	200805108	0.093	RCV000912421.1
1	37948886	37948886	p34.3	G	A	SNV	Exonic	ZC3H12A	NM_001323551.2; NM_001323550.2; NM_025079.3; ENST00000373087.7	c.652G>A; c.1474G>A	p.G492S; p.G218S	missense	Uncertain Significance	Tolerated	0.36	Benign	18.56	149850033	0.052
1	37980300	37980300	p34.3	C	A	SNV	Promoter; Exonic; ncRNA	MEAF6	ENST00000373074.5; NR_073090.3; NM_001270876.3; NR_073092.3; NM_022756.7; NR_073091.3; ENST00000296214.10; ENST00000448519.2; ENST00000373075.6; NM_001270875.3	c.48G>T; n.68G>T; c.-1137G>T	p.R16R	synonymous	Uncertain Significance				14.47	145579568	0.265
1	38006163	38006163	p34.3	G	A	SNV	Exonic	SNIP1	NM_024700.4; ENST00000296215.8	c.521C>T	p.A174V	missense	Uncertain Significance	Tolerated	0.28	Benign	13.87	147613529	0.126	RCV000981741.3
1	38040333	38040333	p34.3	A	G	SNV	Exonic	GNL2	NM_001323623.2; NM_013285.3; NM_001323624.2; ENST00000373062.8	c.1439T>C; c.1235T>C; c.686T>C	p.I480T; p.I412T; p.I229T	missense	Uncertain Significance	Damaging	0	Probably Damaging	28.7	138683858	0.019
1	38061437	38061437	p34.3	C	G	SNV	5'UTR	GNL2	NM_001323623.2; NM_013285.3; NM_001323624.2; ENST00000373062.8	c.-378G>C; c.-14G>C			Uncertain Significance				13.33	200801833	0.067
1	38171233	38171233	p34.3	C	T	SNV	Exonic	CDCA8	ENST00000373055.6; NM_001256875.2; ENST00000327331.2; NM_018101.4	c.705C>T	p.G235G	synonymous	Uncertain Significance				< 10	35181497	0.06
1	38188736	38188736	p34.3	G	A	SNV	Exonic	EPHA10	NM_001099439.2	c.1937C>T	p.T646M	missense	Uncertain Significance	Damaging	0.04	Benign	13.86	146568133	0.244
1	38197214	38197214	p34.3	G	A	SNV	Exonic	EPHA10	NM_001099439.2	c.1532C>T	p.A511V	missense	Uncertain Significance	Tolerated	0.1	Benign	14.59	141193695	0.051
1	38265622	38265622	p34.3	A	G	SNV	Exonic; 3'UTR	MANEAL	NM_001113482.2; ENST00000397631.7; NM_001031740.3; ENST00000373045.11; ENST00000525897.1; ENST00000329006.5; NM_152496.3	c.*91A>G; c.1121A>G; c.455A>G; c.539A>G	p.N180S; p.N152S; p.N374S	missense	Uncertain Significance	Tolerated	0.09	Possibly Damaging	23.6	34750184	0.205
1	38270002	38270002	p34.3	C	T	SNV	Exonic	YRDC	NM_024640.4; ENST00000373044.3	c.739G>A	p.G247R	missense	Uncertain Significance	Damaging	0	Possibly Damaging	31	61778075	0.105
1	38288242	38288242	p34.3	G	A	SNV	Exonic	MTF1	ENST00000373036.5; NM_005955.3	c.1318C>T	p.P440S	missense	Likely Benign	Tolerated	0.96	Benign	16.72	61734999	0.153	RCV000948221.1
1	38463477	38463477	p34.3	G	A	SNV	Exonic	FHL3	NM_004468.5; NM_001243878.2; ENST00000373016.4	c.567C>T; c.243C>T	p.T189T; p.T81T	synonymous	Uncertain Significance				< 10	150225142	0.028
1	39384860	39384860	p34.3	T	A	SNV	Exonic	RHBDL2	ENST00000540558.1; NM_017821.5; NM_001304746.2; ENST00000289248.6	c.25A>T; c.265A>T	p.M9L; p.M89L	missense	Uncertain Significance			Benign	15.86	148931378	0.027
1	39500059	39500059	p34.3	G	A	SNV	Intronic	NDUFS5	NM_004552.3; NM_001184979.2; ENST00000372967.3; ENST00000372969.8	c.217-5G>A			Uncertain Significance				13.35	187238573	0.069
1	39500141	39500141	p34.3	C	A	SNV	Exonic	NDUFS5	NM_004552.3; NM_001184979.2; ENST00000372967.3; ENST00000372969.8	c.294C>A	p.H98Q	missense	Uncertain Significance	Damaging	0.05	Benign	22	146279654	0.01
1	39751317	39751317	p34.3	G	A	SNV	Exonic	MACF1	NM_012090.5; ENST00000671089.1	c.1257G>A; c.1410G>A	p.E419E; p.E470E	synonymous	Likely Benign				< 10	942960532
1	39757636	39757636	p34.3	C	T	SNV	Exonic	MACF1	NM_012090.5; ENST00000671089.1	c.1855C>T; c.1702C>T	p.L619L; p.L568L	synonymous	Uncertain Significance				10.72	141659809	0.005
1	39758439	39758439	p34.3	G	T	SNV	Exonic	MACF1	NM_012090.5; ENST00000671089.1	c.1931G>T; c.1778G>T	p.G593V; p.G644V	missense	Likely Benign	Tolerated	0.32	Benign	22.3	139995582	0.493	RCV000960817.2
1	39852990	39852990	p34.3	T	C	SNV	Exonic	MACF1	NM_012090.5; ENST00000671089.1	c.8137T>C; c.8290T>C	p.L2764L; p.L2713L	synonymous	Likely Benign				< 10	72661966	0.191
1	39898283	39898283	p34.3	G	A	SNV	Exonic	MACF1	NM_012090.5; ENST00000671089.1	c.11075G>A; c.11228G>A	p.R3743H; p.R3692H	missense	Uncertain Significance	Damaging	0	Probably Damaging	32	144615050	0.058
1	40041453	40041453	p34.3	G	T	SNV	Exonic	PABPC4	NM_001135654.2; ENST00000372856.7; ENST00000372857.7; NM_003819.4; NM_001135653.2; ENST00000372858.8	c.171C>A	p.V57V	synonymous	Uncertain Significance				14.59	1266665390	0.003
1	40105297	40105297	p34.2	T	C	SNV	Exonic	HEYL	ENST00000372852.4; NM_014571.4	c.1A>G	p.M1V	start loss	Uncertain Significance			Possibly Damaging	23.6	201783171	0.005
1	40148282	40148282	p34.2	A	G	SNV	Exonic	HPCAL4	NM_001282397.2; ENST00000612703.3; NM_016257.4; ENST00000372844.8; NM_001282396.2	c.286T>C; c.502T>C	p.L168L; p.L96L	synonymous	Likely Benign				< 10	138153096	0.119
1	40228754	40228754	p34.2	T	C	SNV	Intronic	PPIE; BMP8B	NM_001195007.2; ENST00000372830.5; NM_203456.3; ENST00000372827.8; NM_001319293.2; ENST00000356511.6; NM_001720.5	c.*27+431T>C; c.838-607T>C; c.799-607T>C; c.1059+10A>G			Likely Benign				< 10	138571171	0.083	RCV000961002.1
1	40230439	40230439	p34.2	G	A	SNV	Exonic	BMP8B	ENST00000372827.8; NM_001720.5	c.724C>T	p.R242C	missense	Uncertain Significance	Damaging	0.05	Probably Damaging	26.5	144283931	0.023
1	40236843	40236843	p34.2	C	T	SNV	Intronic; Exonic	BMP8B; OXCT2	NM_022120.2; ENST00000372827.8; NM_001720.5; ENST00000327582.5	c.85G>A; c.673+3137G>A	p.A29T	missense	Uncertain Significance	Tolerated	0.42	Benign	< 10	564759495	0.036
1	40315880	40315880	p34.2	C	A	SNV	Exonic; ncRNA; Intronic	TRIT1	NR_132402.1; NR_132412.1; NR_132407.1; NR_132405.1; NM_001312691.1; ENST00000316891.10; NM_017646.6; NR_132413.1; NR_132401.1; NR_132406.1; NM_001312692.1; NR_132404.1; NR_132410.1; NR_132409.1; NR_132414.1; ENST00000441669.6; ENST00000372818.5; NR_132403.1; NR_132408.1; NR_132415.1; ENST00000541099.5	c.374G>T; n.488G>T; n.195-8295G>T; n.195-2111G>T; c.-140-5568G>T; n.634G>T; c.614G>T; n.248G>T; n.195-5568G>T	p.R205L; p.R125L	missense	Uncertain Significance	Tolerated	0.06	Benign	22.1	57069259	0.105
1	40363081	40363081	p34.2	T	C	SNV	Exonic	MYCL	ENST00000372816.3; ENST00000397332.2; NM_001033082.3; NM_001033081.3	c.1148A>G; c.1058A>G	p.Q383R; p.Q353R	missense	Uncertain Significance	Tolerated	0.16		25	780951571	0.002
1	40363445	40363445	p34.2	C	A	SNV	Exonic	MYCL	ENST00000372816.3; ENST00000397332.2; NM_001033082.3; NM_001033081.3	c.784G>T; c.694G>T	p.G262C; p.G232C	missense	Uncertain Significance	Tolerated	0.07		12.54	74067837	0.105						6005558	1.89
1	40539730	40539730	p34.2	G	T	SNV	3'UTR	PPT1	ENST00000641471.1; ENST00000449045.7; NM_000310.4; ENST00000642050.2; NM_001142604.2; ENST00000641319.1; ENST00000530076.6; NM_001363695.2; ENST00000433473.8	c.*134C>A; c.*3C>A			Likely Benign				< 10	150454815	0.475	RCV000715170.1; RCV000127587.3; RCV000582206.1; RCV000371863.4	202903
1	40704730	40704730	p34.2	C	A	SNV	Exonic	RLF	NM_012421.4; ENST00000372771.5	c.4356C>A	p.G1452G	synonymous	Uncertain Significance				10.42	1330312778	0
1	40766942	40766942	p34.2	G	A	SNV	Exonic	COL9A2	ENST00000372748.8; NM_001852.4	c.1982C>T	p.P661L	missense	Uncertain Significance	Damaging	0	Probably Damaging	26.7	150687987	0.217	RCV000243943.5; RCV000724304.4; RCV000385621.2
1	40778295	40778295	p34.2	G	A	SNV	Intronic	COL9A2	ENST00000372748.8; NM_001852.4	c.304-14C>T			Uncertain Significance				< 10	180908956	0.031	RCV000252944.2; RCV001454078.1; RCV001100864.1
1	40782839	40782839	p34.2	G	A	SNV	Exonic	COL9A2	ENST00000372748.8; NM_001852.4	c.31C>T	p.L11F	missense	Likely Benign	Tolerated	0.07	Probably Damaging	22.8	74506933	0.114	RCV000896180.3; RCV000173264.3
1	40928313	40928313	p34.2	G	A	SNV	Exonic; 3'UTR	ZFP69B	NM_001369565.1; ENST00000361584.5; ENST00000484445.5; NM_023070.3	c.657G>A; c.*175G>A	p.Q219Q	synonymous	Uncertain Significance				< 10	144187238	0.049
1	40954877	40954877	p34.2	G	C	SNV	Exonic	ZFP69	NM_001320178.2; NM_198494.3; ENST00000372706.6; ENST00000372705.3; NM_001320179.2	c.337G>C	p.V113L	missense	Likely Benign	Damaging	0.04	Benign	22.4	34752670	0.247	RCV000946462.1
1	41204578	41204578	p34.2	G	A	SNV	Exonic	NFYC	NM_001142588.2; ENST00000308733.9; NM_001142590.2; ENST00000456393.6; NM_001142587.2; NM_014223.5; NM_001308115.2; ENST00000447388.7; ENST00000372654.5; ENST00000427410.6; NM_001142589.2; ENST00000372653.5; NM_001308114.1; ENST00000425457.6; ENST00000372652.5	c.63G>A	p.S21S	synonymous	Uncertain Significance				11.51	112892225	0.193
1	41223876	41223876	p34.2	C	T	SNV	Exonic	NFYC	NM_001142588.2; ENST00000308733.9; NM_001142590.2; ENST00000456393.6; NM_001142587.2; NM_014223.5; NM_001308115.2; ENST00000447388.7; ENST00000427410.6; ENST00000372654.5; NM_001142589.2; ENST00000372653.5; NM_001308114.1; ENST00000425457.6; ENST00000372652.5	c.357C>T; c.471C>T	p.V157V; p.V119V	synonymous	Uncertain Significance				10.87	61743552	0.17
1	41289942	41289942	p34.2	G	A	SNV	Intronic	KCNQ4	NM_004700.4; NM_172163.3; ENST00000347132.10	c.1130+1868G>A; c.1292+12G>A			Uncertain Significance				13.21	200426006	0.083	RCV000222365.1; RCV001547799.1
1	41296876	41296876	p34.2	T	C	SNV	Exonic	KCNQ4	NM_004700.4; NM_172163.3; ENST00000347132.10	c.1413T>C; c.1251T>C	p.G471G; p.G417G	synonymous	Uncertain Significance				< 10	144810195	0.009	RCV000970045.1; RCV000216153.1
1	41514455	41514455	p34.2	G	T	SNV	Exonic; ncRNA	SCMH1	NM_001350667.2; NM_001172220.2; ENST00000372596.5; NM_001172219.2; ENST00000372597.5; NM_001031694.2; NM_001350668.1; NM_012236.4; ENST00000326197.11; ENST00000456518.3; NM_001172222.2; NM_001172221.2; ENST00000372595.5; ENST00000337495.9; NM_001172218.2; NR_135092.1; ENST00000397174.6	c.1213C>A; c.679C>A; c.1042C>A; n.1552C>A; c.1183C>A; c.910C>A; c.709C>A; c.1000C>A	p.Q304K; p.Q348K; p.Q227K; p.Q405K; p.Q395K; p.Q334K; p.Q237K	missense	Uncertain Significance	Tolerated	0.78	Possibly Damaging	26.3	142187533	0.13
1	41976727	41976727	p34.2	G	A	SNV	Exonic	HIVEP3	ENST00000372583.6; ENST00000643665.1; NM_001127714.3; ENST00000372584.5; NM_024503.5	c.6613C>T; c.6616C>T	p.R2205W; p.R2206W	missense	Uncertain Significance	Damaging	0.02	Probably Damaging	27.9	141285859	0.056
1	42046782	42046782	p34.2	C	A	SNV	Exonic	HIVEP3	ENST00000372583.6; ENST00000643665.1; NM_001127714.3; ENST00000372584.5; NM_024503.5	c.3687G>T	p.P1229P	synonymous	Likely Benign				< 10	61732495	0.212
1	42628575	42628575	p34.2	C	T	SNV	3'UTR	GUCA2A	NM_033553.3; ENST00000357001.3	c.*2G>A			Likely Benign				< 10	140969935	0.198
1	42629176	42629176	p34.2	C	T	SNV	Exonic	GUCA2A	NM_033553.3; ENST00000357001.3	c.181G>A	p.G61S	missense	Uncertain Significance	Tolerated	0.72	Benign	< 10	111699037	0.075
1	42744214	42744214	p34.2	T	G	SNV	Exonic	FOXJ3	NM_001198852.2; NM_014947.5; ENST00000361346.6; ENST00000372572.5; NM_001198850.2; ENST00000372573.5; NM_001198851.2	c.174A>C	p.A58A	synonymous	Uncertain Significance				12.22	116819933	0.15
1	43004870	43004870	p34.2	T	C	SNV	Exonic; Intronic	CCDC30	ENST00000657597.1; ENST00000668663.1; ENST00000665176.1; ENST00000671281.1; NM_001355226.2; ENST00000664805.1; ENST00000655164.1; NM_001355227.2; NM_001080850.3; ENST00000661864.1; NM_001355224.2; ENST00000660083.1; ENST00000667205.1	c.144T>C; c.-232+4210T>C; c.457-27097T>C; c.-402+2598T>C; c.-790+2598T>C; c.612T>C	p.L48L; p.L204L	synonymous	Likely Benign				< 10	1029010040
1	43111853	43111853	p34.2	G	A	SNV	Exonic	CCDC30	ENST00000657597.1; ENST00000668663.1; ENST00000665176.1; NM_001355226.2; ENST00000664805.1; NM_001355227.2; NM_001080850.3; NM_001355224.2; ENST00000667205.1; ENST00000660083.1	c.1719G>A; c.2406G>A; c.1938G>A; c.1032G>A	p.L802L; p.L646L; p.L344L; p.L573L	synonymous	Likely Benign				< 10	61729295	0.182
1	43215861	43215861	p34.2	G	A	SNV	Exonic	P3H1	ENST00000236040.8; NM_022356.4; ENST00000296388.10; NM_001243246.2; NM_001146289.2; ENST00000397054.7	c.1716C>T	p.I572I	synonymous	Likely Benign				10.16	35500164	0.181	RCV000430034.1; RCV001000482.4
1	43263782	43263782	p34.2	G	A	SNV	Exonic	TMEM269	NM_001354602.2	c.498G>A	p.L166L	synonymous	Likely Benign				< 10	75264211	0.231
1	43308250	43308250	p34.2	T	C	SNV	Exonic	ERMAP	NM_018538.4; ENST00000372517.8; ENST00000372514.7; NM_001017922.2	c.775T>C	p.C259R	missense	Uncertain Significance	Tolerated	0.16	Benign	11.35	35147822	0.225
1	43315368	43315368	p34.2	G	A	SNV	Exonic; Intronic; 5'UTR	ZNF691	ENST00000372508.7; NM_001242739.2; ENST00000651192.1; ENST00000372502.5; ENST00000372506.5; NM_015911.4	c.39G>A; c.-9-1253G>A; c.-55G>A	p.S13S	synonymous	Likely Benign				< 10	145787587	0.009
1	43394654	43394654	p34.2	G	C	SNV	Exonic	SLC2A1	ENST00000426263.10; NM_006516.4; ENST00000674765.1	c.1023C>G	p.L341L	synonymous	Uncertain Significance				< 10	143588685	0.003	RCV000194739.1; RCV001425993.1
1	43408984	43408984	p34.2	C	T	SNV	Exonic	SLC2A1	ENST00000426263.10; NM_006516.4; ENST00000674765.1	c.27G>A	p.T9T	synonymous	Likely Benign				< 10	34025424	0.176	RCV000715098.1; RCV000271966.2; RCV001080125.2; RCV000463852.11; RCV000147525.6; RCV000327064.2	720656
1	43621973	43621973	p34.2	C	T	SNV	Exonic	FAM183A	NM_001101376.3; ENST00000335282.5	c.394C>T	p.H132Y	missense	Likely Benign			Benign	< 10	59274667	0.135
1	43632537	43632537	p34.2	G	A	SNV	Exonic	EBNA1BP2	NM_001159936.1; NM_006824.3; ENST00000236051.3; ENST00000431635.6	c.832C>T; c.667C>T	p.R278C; p.R223C	missense	Uncertain Significance	Damaging	0.05	Possibly Damaging	17.33	75143777	0.167
1	43738488	43738488	p34.2	G	A	SNV	Exonic	TMEM125	ENST00000432792.6; NM_001320244.2; NM_144626.3; ENST00000439858.6	c.95G>A	p.R32Q	missense	Uncertain Significance	Tolerated	0.19	Possibly Damaging	23	200069787	0.021
1	43738498	43738498	p34.2	G	A	SNV	Exonic	TMEM125	ENST00000432792.6; NM_001320244.2; NM_144626.3; ENST00000439858.6	c.105G>A	p.A35A	synonymous	Likely Benign				< 10	34109259	0.331
1	43771013	43771013	p34.2	C	T	SNV	Exonic	TIE1	ENST00000538015.1; ENST00000372476.8; NM_005424.5; NM_001253357.2	c.348C>T; c.483C>T	p.N161N; p.N116N	synonymous	Likely Benign				15.49	201801618	0.162	RCV000961881.1
1	43805093	43805093	p34.2	T	C	SNV	Exonic	MPL	ENST00000413998.7; NM_005373.3; ENST00000372470.9	c.543T>C; c.522T>C	p.G174G; p.G181G	synonymous	Likely Benign				< 10	17572791	0.26	RCV000331889.1; RCV000552215.4; RCV000275711.2
1	43893384	43893384	p34.2	C	T	SNV	Exonic	SZT2	NM_015284.4; NM_001365999.1	c.3611C>T; c.3782C>T	p.A1261V; p.A1204V	missense	Uncertain Significance			Benign	11.98	200635457	0.042	RCV000870705.5; RCV000716342.1; RCV001335725.1					6056352	5.26
1	43894042	43894042	p34.2	T	C	SNV	Exonic	SZT2	NM_015284.4; NM_001365999.1	c.4051T>C; c.3880T>C	p.W1294R; p.W1351R	missense	Likely Benign			Benign	17.23	72883814	0.251	RCV000718041.1; RCV000713745.4
1	43905375	43905375	p34.2	G	A	SNV	Exonic	SZT2	NM_015284.4; NM_001365999.1	c.6806G>A; c.6977G>A	p.R2326Q; p.R2269Q	missense	Uncertain Significance			Benign	11.12	146140125	0.022	RCV000720096.1; RCV000713755.4
1	43908946	43908946	p34.2	A	C	SNV	Intronic	SZT2	NM_015284.4; NM_001365999.1	c.8328+8A>C; c.8499+8A>C			Likely Benign				< 10	182225944	0.082	RCV000250595.1; RCV000861989.3
1	43913968	43913968	p34.2	G	A	SNV	Promoter; ncRNA; Exonic	SZT2-AS1; SZT2; MIR6735	NM_015284.4; NR_106793.1; NM_001365999.1; NR_046744.1	c.9782G>A; n.-242G>A; n.348C>T; c.9611G>A	p.R3261Q; p.R3204Q	missense	Uncertain Significance			Benign	15.64	190363418	0.069	RCV000718584.1; RCV000862207.4
1	44056759	44056759	p34.2	G	T	SNV	Exonic	PTPRF	ENST00000359947.9; NM_130440.4; NM_001329137.2; ENST00000438120.5; NM_002840.5; NM_001329140.2; NM_001329138.2; NM_001329139.2	c.1066G>T; c.1084G>T; c.1096G>T	p.A362S; p.A356S; p.A366S	missense	Uncertain Significance	Tolerated	0.86	Benign	13.97	79621077	0.057	RCV000910250.2
1	44118876	44118876	p34.1	C	T	SNV	Exonic	KDM4A	NM_014663.3; ENST00000372396.4	c.30C>T	p.P10P	synonymous	Likely Benign				12.34	140577325	0.23	RCV000907174.1
1	44415469	44415469	p34.1	A	G	SNV	Exonic	IPO13	ENST00000372343.8; NM_014652.4	c.465A>G	p.S155S	synonymous	Uncertain Significance				< 10	114449275	0.046
1	44423931	44423931	p34.1	G	A	SNV	Exonic	IPO13	ENST00000372343.8; NM_014652.4	c.1740G>A	p.Q580Q	synonymous	Uncertain Significance				12.04	16831490	0.151
1	44424454	44424454	p34.1	T	C	SNV	Exonic	IPO13	ENST00000372343.8; NM_014652.4	c.1921T>C	p.L641L	synonymous	Uncertain Significance				10.16	147903080	0.004
1	44424525	44424525	p34.1	G	A	SNV	Exonic	IPO13	ENST00000372343.8; NM_014652.4	c.1992G>A	p.E664E	synonymous	Uncertain Significance				10.7	74073335	0.26
1	44441825	44441825	p34.1	G	T	SNV	Exonic	ATP6V0B	NM_001294333.2; ENST00000532642.5; NM_004047.5; ENST00000498664.1; NM_001039457.3; ENST00000472174.7; ENST00000236067.8	c.180G>T; c.39G>T	p.L60L; p.L13L	synonymous	Uncertain Significance				13.91	760632445
1	44595318	44595318	p34.1	G	A	SNV	Exonic	KLF17	NM_173484.4; ENST00000372299.4	c.375G>A	p.T125T	synonymous	Likely Benign				< 10	142760680	0.066
1	44595524	44595524	p34.1	C	G	SNV	Exonic	KLF17	NM_173484.4; ENST00000372299.4	c.581C>G	p.P194R	missense	Uncertain Significance	Damaging	0.03	Probably Damaging	16.66	138244178	0.081						3490102	0.53
1	44595525	44595525	p34.1	G	A	SNV	Exonic	KLF17	NM_173484.4; ENST00000372299.4	c.582G>A	p.P194P	synonymous	Likely Benign				< 10	553279016	0.085
1	44680575	44680575	p34.1	G	A	SNV	Intronic	DMAP1	ENST00000361745.10; ENST00000372289.7; NM_019100.5; NM_001034023.2; ENST00000315913.9; NM_001034024.2	c.393+5G>A			Uncertain Significance				20.5	374236306	0.004
1	44685696	44685696	p34.1	C	T	SNV	Exonic	DMAP1	ENST00000361745.10; ENST00000372289.7; NM_019100.5; NM_001034023.2; ENST00000315913.9; NM_001034024.2	c.1059C>T	p.S353S	synonymous	Uncertain Significance				10.85	149066039	0.086
1	45110683	45110683	p34.1	G	A	SNV	Exonic; Intronic	TMEM53; RNF220	NM_001376487.1; ENST00000372244.3; NM_001319957.2; NM_001376488.1; NM_018150.4; NM_001376489.1; ENST00000355387.6; ENST00000372243.7; ENST00000361799.7; NM_001319956.1; NM_001376486.1	c.466G>A; c.1318G>A; c.166+349C>T; c.1240G>A; c.601G>A; c.288+349C>T	p.V201I; p.V156I; p.V414I; p.V440I	missense	Uncertain Significance	Tolerated	0.4	Benign	18.26	150037632	0.235
1	45190451	45190451	p34.1	C	G	SNV	Exonic	ARMH1	NM_001145636.2	c.1068C>G	p.F356L	missense	Uncertain Significance	Damaging	0.02	Benign	17.22
1	45288336	45288336	p34.1	T	C	SNV	Exonic	PTCH2	ENST00000372192.4; NM_003738.5; NM_001166292.2; ENST00000447098.6	c.3363A>G	p.I1121M	missense	Uncertain Significance	Tolerated	0.15	Benign	15.66	11573598	0.051	RCV000468241.4
1	45294261	45294261	p34.1	C	T	SNV	Exonic	PTCH2	ENST00000372192.4; NM_003738.5; NM_001166292.2; ENST00000447098.6	c.1507G>A	p.V503I	missense	Uncertain Significance	Tolerated	0.54	Benign	< 10	147284320	0.017	RCV000477258.4
1	45471780	45471780	p34.1	G	A	SNV	Exonic	HECTD3	ENST00000372168.7; NM_024602.6	c.564C>T; c.1734C>T	p.G578G; p.G188G	synonymous	Uncertain Significance				12.32	202181976	0.016
1	45475311	45475311	p34.1	G	A	SNV	Promoter; Exonic	UROD; HECTD3	ENST00000652165.1; ENST00000372168.7; NM_024602.6	c.-2582G>A; c.-1250C>T; c.804C>T	p.T268T	synonymous	Uncertain Significance				11.87	150045938	0.165
1	45481018	45481018	p34.1	G	A	SNV	Exonic; ncRNA	UROD	ENST00000246337.9; NR_158184.1; ENST00000652165.1; NR_158185.1; ENST00000491773.6; NR_036510.2; ENST00000651476.1; ENST00000652287.1; NM_000374.5	c.847G>A; n.1033G>A; c.952G>A; n.983G>A; c.709G>A; n.1014G>A; c.889G>A	p.G318R; p.G297R; p.G237R; p.G283R	missense	Likely Pathogenic	Activating	1	Benign	10.72	116233118	0.168	RCV001100774.1
1	45796880	45796880	p34.1	C	T	SNV	Exonic; ncRNA	MUTYH	ENST00000448481.5; NM_001048174.2; NM_001293192.2; NR_146882.2; NM_001128425.2; ENST00000672818.2; NM_001048173.2; ENST00000372104.5; NR_146883.2; ENST00000456914.7; ENST00000355498.6; ENST00000529984.5; ENST00000372115.7; ENST00000372098.7; ENST00000354383.10; NM_001293195.2; NM_001293196.2; NM_001293190.2; NM_001048172.2; NM_001350650.2; NM_001048171.2; NM_001293191.2; NM_001350651.2; ENST00000…	c.1369G>A; c.1366G>A; c.1090G>A; n.1443G>A; c.1408G>A; n.1594G>A; c.1441G>A; c.451G>A; c.1411G>A; c.1450G>A; c.1399G>A; c.1021G>A	p.A364T; p.A484T; p.A341T; p.A457T; p.A467T; p.A456T; p.A151T; p.A471T; p.A481T; p.A470T	missense	Uncertain Significance	Tolerated	0.26	Benign	22.8	1441591597	0	RCV000704544.4; RCV000565617.5
1	45800079	45800079	p34.1	C	T	SNV	Exonic; ncRNA; 5'UTR	MUTYH	ENST00000448481.5; NM_001048174.2; NM_001293192.2; NR_146882.2; NM_001128425.2; NM_001048173.2; ENST00000372104.5; ENST00000672818.2; NR_146883.2; ENST00000456914.7; ENST00000355498.6; ENST00000529984.5; ENST00000372115.7; ENST00000372098.7; ENST00000354383.10; NM_001293195.2; NM_001293196.2; NM_001293190.2; NM_001048172.2; NM_001350650.2; NM_001048171.2; NM_001293191.2; NM_001350651.2; ENST00000…	c.141G>A; n.250G>A; c.-109G>A; n.327G>A; c.-114G>A; c.99G>A; c.-173G>A	p.K47K; p.K33K	synonymous	Likely Benign				< 10	375084663	0.003	RCV000217129.2; RCV001087874.2; RCV000731866.3
1	45810620	45810620	p34.1	C	T	SNV	Exonic	TESK2	ENST00000372084.5; ENST00000372086.4; NM_001320800.2; NM_007170.3	c.1608G>A; c.1359G>A; c.1521G>A	p.A507A; p.A536A; p.A453A	synonymous	Uncertain Significance				< 10	200676018	0.002
1	45974520	45974520	p34.1	G	A	SNV	Exonic	MMACHC	NM_015506.3; ENST00000401061.9; NM_001330540.2; ENST00000616135.1	c.482G>A; c.311G>A	p.R161Q; p.R104Q	missense	Uncertain Significance	Damaging	0	Probably Damaging	29.9	121918243	0.016	RCV000081740.9; RCV000721969.1; RCV000001490.12; RCV001273229.1; RCV000203236.1; RCV000624532.1		609831	277400
1	46027477	46027477	p34.1	C	T	SNV	Exonic	AKR1A1	NM_006066.4; ENST00000471651.1; NM_153326.3; ENST00000351829.9; NM_001202413.2; ENST00000372070.7; NM_001202414.2	c.11C>T	p.S4F	missense	Uncertain Significance	Tolerated	0.08	Benign	23.8	61733010	0.054
1	46086588	46086588	p34.1	T	C	SNV	Exonic; Intronic	CCDC17	ENST00000528266.6; NM_001114938.3; ENST00000445048.2; ENST00000421127.6; NM_001190182.2	c.1586A>G; c.175-483A>G; c.1559A>G	p.N520S; p.N529S	missense	Uncertain Significance	Damaging	0	Probably Damaging	25.1	16832629	0.213
1	46087898	46087898	p34.1	G	C	SNV	Intronic	CCDC17	ENST00000528266.6; NM_001114938.3; ENST00000445048.2; ENST00000421127.6; NM_001190182.2	c.174+1510C>G; c.940+15C>G; c.967+15C>G			Likely Benign				< 10	185868141	0.109
1	46088449	46088449	p34.1	G	A	SNV	Exonic; Intronic	CCDC17	ENST00000528266.6; NM_001114938.3; ENST00000445048.2; ENST00000421127.6; NM_001190182.2	c.687C>T; c.714C>T; c.174+959C>T	p.N238N; p.N229N	synonymous	Likely Benign				< 10	138659279	0.038
1	46099844	46099844	p34.1	G	A	SNV	Exonic	GPBP1L1	ENST00000355105.8; NM_021639.5	c.809C>T	p.S270F	missense	Uncertain Significance	Damaging	0	Possibly Damaging	25	972753038	0
1	46498035	46498035	p34.1	A	C	SNV	Exonic	MAST2	ENST00000674079.1; NM_001324321.2; NM_001324320.2; NM_001319245.2; ENST00000361297.7; NM_015112.3	c.2944A>C; c.3394A>C; c.2911A>C; c.3373A>C	p.M982L; p.M971L; p.M1125L; p.M1132L	missense	Uncertain Significance	Tolerated	0.54	Benign	23.6	753977328	0
1	46500634	46500634	p34.1	C	T	SNV	Exonic	MAST2	ENST00000674079.1; NM_001324321.2; NM_001324320.2; NM_001319245.2; ENST00000361297.7; NM_015112.3	c.3864C>T; c.4293C>T; c.3831C>T; c.4290C>T; c.4314C>T	p.D1288D; p.D1277D; p.D1438D; p.D1430D; p.D1431D	synonymous	Likely Benign				< 10	371621386	0.04
1	46649997	46649997	p34.1	C	T	SNV	Exonic	TSPAN1	NM_005727.4; ENST00000372003.6	c.192C>T	p.G64G	synonymous	Uncertain Significance				< 10	145996817	0.041
1	46739409	46739409	p34.1	C	T	SNV	Exonic	RAD54L	ENST00000442598.5; NM_003579.4; NM_001370766.1; ENST00000671528.1; NM_001142548.2; ENST00000371975.9	c.1060C>T; c.1600C>T	p.R354C; p.R534C	missense	Uncertain Significance	Damaging	0	Possibly Damaging	28.7	28363240	0.072						9177354	0.85
1	46745180	46745180	p34.1	C	A	SNV	Exonic	LRRC41	ENST00000617190.5; NM_006369.5; ENST00000615587.4; ENST00000343304.10	c.2061G>T; c.2127G>T	p.L687L; p.L709L	synonymous	Uncertain Significance				10.15	374531199	0.003
1	46870839	46870839	p33	C	T	SNV	Intronic	FAAH	ENST00000243167.9; NM_001441.3	c.444+19C>T			Uncertain Significance				< 10	202060291	0.024
1	46874804	46874804	p33	A	G	SNV	Exonic	FAAH	ENST00000243167.9; NM_001441.3	c.1109A>G	p.H370R	missense	Uncertain Significance	Tolerated	0.33	Benign	16.92	12094805	0.013
1	46977791	46977791	p33	G	C	SNV	Exonic	DMBX1	ENST00000371956.8; NM_001387776.1; ENST00000360032.4; NM_001387775.1; NM_147192.4; NM_172225.2	c.774G>C; c.759G>C	p.S258S; p.S253S	synonymous	Likely Benign				< 10	114951731	0.158
1	47013417	47013417	p33	C	T	SNV	Intronic; Exonic	KNCN; MKNK1-AS1	NM_001097611.1; NR_038403.1; NM_001322255.2	c.291G>A; n.254+3977C>T; c.360G>A	p.G97G; p.G120G	synonymous	Likely Benign				< 10	115695168	0.185
1	47131314	47131314	p33	C	T	SNV	Intronic	ATPAF1	ENST00000329231.8; ENST00000532925.5; NM_022745.5; ENST00000371937.8; ENST00000576409.5; ENST00000542495.5; NM_001243728.1; NM_001256418.1; ENST00000574428.5; NM_001042546.2	c.336-278G>A; c.267-278G>A; c.2+5G>A; c.-279+5G>A			Uncertain Significance				14.36	146883766	0.009
1	47134051	47134051	p33	G	A	SNV	Promoter; Exonic	ATPAF1	ENST00000329231.8; NM_022745.5; ENST00000371937.8; ENST00000576409.5; ENST00000574428.5; NM_001042546.2	c.-57C>T; c.13C>T	p.R5C	missense	Uncertain Significance				22.8	767958364
1	47279898	47279898	p33	C	T	SNV	Exonic; ncRNA	CYP4B1	NR_135003.2; ENST00000271153.8; ENST00000371919.8; NM_001319161.2; NM_000779.4; NM_001099772.2; NM_001319163.2; NM_001319162.2; ENST00000371923.9	c.790C>T; c.301C>T; c.304C>T; c.793C>T; c.748C>T; n.756C>T	p.R264W; p.R265W; p.R101W; p.R102W; p.R250W	missense	Likely Benign	Damaging	0.05	Possibly Damaging	25.7	45446505	0.308	RCV000963757.1
1	47283705	47283705	p33	C	T	SNV	Intronic	CYP4B1	NR_135003.2; ENST00000271153.8; ENST00000371919.8; NM_001319161.2; NM_000779.4; NM_001319163.2; NM_001099772.2; NM_001319162.2; ENST00000371923.9	c.1269+4C>T; c.780+4C>T; c.783+4C>T; n.1235+4C>T; c.1272+4C>T; c.1227+4C>T			Likely Benign				< 10	45482605	0.102
1	47399659	47399659	p33	C	T	SNV	Exonic; ncRNA; Intronic	CYP4A11	ENST00000371905.1; NR_134994.2; NR_134990.2; NR_134988.2; NM_001319155.2; NR_134991.2; NR_134989.2; NM_001363587.2; NM_000778.4; NR_134992.2; ENST00000310638.9; NR_134993.2	n.878G>A; n.1128G>A; n.1069G>A; c.1085G>A; n.1085G>A; n.785+466G>A; n.1050G>A; c.1181G>A; c.887G>A	p.S362N; p.S296N; p.S394N	missense	Uncertain Significance	Tolerated	0.2	Benign	14.5	1162357390	0
1	47407002	47407002	p33	A	G	SNV	Exonic; ncRNA	CYP4A11	ENST00000371905.1; NR_134994.2; NR_134990.2; NM_001319155.2; NR_134988.2; NR_134989.2; NR_134991.2; NM_001363587.2; NM_000778.4; NR_134992.2; ENST00000310638.9; NR_134993.2	n.147T>C; c.104T>C	p.V35A	missense	Uncertain Significance	Tolerated	0.73	Benign	< 10	149204978	0.095
1	47512211	47512211	p33	G	C	SNV	Exonic	CYP4X1	NM_001320290.2; ENST00000371901.4; NM_001320289.2; NM_178033.2	c.1146G>C; c.1143G>C; c.951G>C	p.P317P; p.P382P; p.P381P	synonymous	Likely Benign				< 10	61742240	0.133
1	47653052	47653052	p33	C	T	SNV	Exonic	PDZK1IP1	NM_005764.4; ENST00000294338.7	c.115G>A	p.V39M	missense	Uncertain Significance	Damaging	0	Probably Damaging	25.9	200168915	0.083
1	47655559	47655559	p33	G	T	SNV	Exonic	PDZK1IP1	NM_005764.4; ENST00000294338.7	c.46C>A	p.P16T	missense	Uncertain Significance	Tolerated	0.3	Benign	< 10	764384045	0.002
1	47691481	47691481	p33	G	C	SNV	Exonic; Intronic	TAL1	NM_001290406.2; ENST00000294339.3; NM_001290404.1; ENST00000371884.6; NM_001290405.1; NM_003189.5; NM_001287347.2; NM_001290403.2	c.80C>G; c.-31-1711C>G	p.A27G	missense	Uncertain Significance	Tolerated	0.28	Possibly Damaging	23.6	200636503	0.034
1	47725974	47725974	p33	C	A	SNV	Exonic	STIL	NM_001377417.1; NM_001048166.1; NM_001282939.1; ENST00000360380.7; NM_003035.2; NM_001282936.1; ENST00000396221.6; ENST00000371877.8; NM_001282937.1; NM_001282938.1	c.3067G>T; c.3064G>T; c.2872G>T; c.2926G>T; c.3013G>T	p.V976L; p.V958L; p.V1023L; p.V1022L; p.V1005L	missense	Uncertain Significance	Damaging	0.05	Probably Damaging	24.1	144586803	0.01	RCV000147692.2; RCV000713535.1
1	47753287	47753287	p33	C	T	SNV	Exonic	STIL	NM_001377417.1; NM_001048166.1; NM_001282939.1; ENST00000360380.7; NM_003035.2; NM_001282936.1; ENST00000396221.6; ENST00000371877.8; NM_001282937.1; NM_001282938.1	c.928G>A; c.1069G>A	p.A310T; p.A357T	missense	Uncertain Significance	Tolerated	0.13	Benign	11.7	75426387	0.082	RCV000967915.3; RCV000147678.2	248721
1	47753336	47753336	p33	A	G	SNV	Intronic	STIL	NM_001377417.1; NM_001048166.1; NM_001282939.1; ENST00000360380.7; NM_003035.2; NM_001282936.1; ENST00000396221.6; ENST00000371877.8; NM_001282937.1; NM_001282938.1	c.883-4T>C; c.1024-4T>C			Uncertain Significance				15.15	188900275	0.068	RCV000435195.2; RCV000728501.3	248722
1	47842356	47842356	p33	A	G	SNV	Intronic	CMPK1	NM_016308.3; ENST00000371873.9; NR_046394.2; ENST00000450808.2; NM_001136140.2; NM_001366135.1	n.725-20A>G; c.499-20A>G; c.646-20A>G; c.550-20A>G			Uncertain Significance				< 10	181963933	0.013
1	47882263	47882263	p33	C	T	SNV	Intronic; Exonic	LINC01389; FOXE3	NR_126355.1; ENST00000335071.4; NM_012186.3	n.29-6690G>A; c.276C>T	p.L92L	synonymous	Uncertain Significance				10.84	143712915	0.034	RCV000878655.3; RCV001565577.1
1	48231582	48231582	p33	G	T	SNV	Exonic	TRABD2B	NM_001194986.2; ENST00000606738.3	c.1546C>A	p.P516T	missense	Uncertain Significance				17.39	61743569	0.195
1	48231785	48231785	p33	A	G	SNV	Intronic	TRABD2B	NM_001194986.2; ENST00000606738.3	c.1350-7T>C			Uncertain Significance				< 10	180959922	0.034
1	48459856	48459856	p33	C	T	SNV	Exonic	TRABD2B	NM_001194986.2; ENST00000606738.3	c.516G>A	p.S172S	synonymous	Likely Benign				< 10	74075030	0.185
1	49052660	49052660	p33	T	A	SNV	Intronic	AGBL4	NM_001323573.2; NR_136623.2; NM_032785.4; NM_001323574.2; ENST00000371839.6; NM_001323575.2	c.1303+16A>T; n.1424+16A>T; c.1267+16A>T			Uncertain Significance				< 10	370444372	0.102
1	49511311	49511311	p33	C	T	SNV	Exonic; ncRNA	AGBL4	NM_001323573.2; ENST00000371836.1; NR_136623.2; NM_032785.4; NM_001323574.2; ENST00000371839.6; NM_001323575.2	n.572G>A; c.575G>A; c.539G>A	p.S192N; p.S180N	missense	Uncertain Significance	Tolerated	0.5	Benign	19.73	72895659	0.529
1	52222016	52222016	p32.3	G	A	SNV	Exonic; Intronic; ncRNA; 5'UTR	OSBPL9	ENST00000447887.5; NM_001330580.2; NM_148905.4; NM_148909.4; ENST00000361556.9; ENST00000453295.5; NR_036662.2; ENST00000428468.6; NM_148904.4; NM_001350210.2; ENST00000486942.5; NM_148908.4; NM_001350208.2; NM_024586.6; ENST00000462759.5; ENST00000371714.5; NM_001350209.2; NM_148907.3; NM_148906.3	n.508G>A; c.73G>A; c.49-4346G>A; c.568G>A; c.517G>A; c.24+3619G>A; c.253-4346G>A; c.-113G>A; c.613-4346G>A; c.544-4346G>A	p.A173T; p.A25T; p.A190T	missense	Uncertain Significance	Tolerated	0.67	Benign	22.4	72900003	0.237
1	52249642	52249642	p32.3	C	T	SNV	Exonic; ncRNA	OSBPL9	ENST00000447887.5; NM_001330580.2; NM_148905.4; NM_148909.4; ENST00000361556.9; ENST00000453295.5; NR_036662.2; ENST00000428468.6; NM_148904.4; NM_001350210.2; ENST00000486942.5; NM_001350208.2; NM_148908.4; ENST00000462759.5; ENST00000371714.5; NM_148907.3; NM_001350209.2; NM_024586.6; NM_148906.3	c.1035C>T; c.1569C>T; c.1599C>T; n.1509C>T; c.1074C>T; c.924C>T; c.1530C>T; c.1239C>T; c.1518C>T; c.1011C>T	p.I523I; p.I337I; p.I533I; p.I358I; p.I413I; p.I308I; p.I506I; p.I345I; p.I510I	synonymous	Uncertain Significance				12.53	61743086	0.029
1	52385700	52385700	p32.3	T	C	SNV	Exonic	RAB3B	NM_002867.4; ENST00000371655.4	c.559A>G	p.M187V	missense	Uncertain Significance	Tolerated	0.14	Probably Damaging	25.7	34017695	0.025
1	52499253	52499253	p32.3	C	A	SNV	Exonic; ncRNA; Intronic; 3'UTR	KTI12; TXNDC12	NR_046406.1; ENST00000610127.2; NM_015913.4; NM_138417.3; NR_046405.1; ENST00000371626.9; ENST00000371614.2	c.*461G>T; c.181G>T; n.1581G>T; c.159-4951G>T; n.1704G>T	p.A61S	missense	Uncertain Significance	Tolerated	0.44	Benign	19.15	78835924	0.046
1	52703515	52703515	p32.3	G	C	SNV	Exonic	ZFYVE9	ENST00000357206.6; ENST00000371591.2; NM_004799.4; NM_007324.5	c.426G>C	p.L142L	synonymous	Uncertain Significance				10.84	58871384	0.161
1	52705004	52705004	p32.3	A	G	SNV	Exonic	ZFYVE9	ENST00000357206.6; ENST00000371591.2; NM_004799.4; NM_007324.5	c.1915A>G	p.I639V	missense	Uncertain Significance	Tolerated	0.58	Benign	14.76	11809887	0.142
1	52705174	52705174	p32.3	A	G	SNV	Exonic	ZFYVE9	ENST00000357206.6; ENST00000371591.2; NM_004799.4; NM_007324.5	c.2085A>G	p.V695V	synonymous	Likely Benign				< 10	34437486	0.24
1	52734181	52734181	p32.3	C	T	SNV	Exonic	ZFYVE9	ENST00000357206.6; ENST00000371591.2; NM_004799.4; NM_007324.5	c.2502C>T; c.2325C>T	p.I775I; p.I834I	synonymous	Uncertain Significance				10.54	149206347	0.114
1	52761589	52761589	p32.3	T	C	SNV	Exonic	ZFYVE9	ENST00000357206.6; ENST00000371591.2; NM_004799.4; NM_007324.5	c.3096T>C; c.3273T>C	p.S1032S; p.S1091S	synonymous	Uncertain Significance				10.24	75170007	0.127
1	52825423	52825423	p32.3	C	T	SNV	Exonic	CC2D1B	NM_032449.3; NM_001330585.2	c.896G>A	p.R299Q	missense	Uncertain Significance	Tolerated	1	Benign	15.15	761461960	0.003						6621098	0.32
1	52825460	52825460	p32.3	G	C	SNV	Exonic	CC2D1B	NM_032449.3; NM_001330585.2	c.859C>G	p.Q287E	missense	Uncertain Significance	Tolerated	0.14	Probably Damaging	25.6	142040043	0.015
1	52826724	52826724	p32.3	A	C	SNV	Exonic	CC2D1B	NM_032449.3; NM_001330585.2	c.399T>G	p.S133S	synonymous	Likely Benign				< 10	41311156	0.186
1	52850306	52850306	p32.3	G	A	SNV	Exonic	ORC1	NM_001190818.2; NM_004153.4; NM_001190819.2; ENST00000371568.8; ENST00000371566.1	c.1656C>T; c.1671C>T	p.A557A; p.A552A	synonymous	Likely Benign				< 10	61756137	0.086	RCV000905283.3; RCV000330981.2
1	52870547	52870547	p32.3	T	C	SNV	Promoter; Exonic	PRPF38A; ORC1	NM_004153.4; NM_001190818.2; NM_001190819.2; ENST00000371568.8; ENST00000371566.1; NM_032864.4; ENST00000257181.10	c.126T>C; c.-635A>G; c.-632A>G	p.L42L	synonymous	Uncertain Significance				10.41	142380332	0.027
1	52924086	52924086	p32.3	T	C	SNV	Exonic	TUT4	NM_001009881.3; NM_015269.2; ENST00000257177.9	c.3357A>G	p.L1119L	synonymous	Uncertain Significance				10.68	139195152	0.04
1	52941017	52941017	p32.3	C	T	SNV	Exonic	TUT4	NM_001009881.3; NM_015269.2; ENST00000257177.9	c.2214G>A	p.S738S	synonymous	Likely Benign				< 10	74741788	0.111
1	53108545	53108545	p32.3	C	T	SNV	ncRNA; Exonic	SHISAL2A	ENST00000517870.2; NR_135156.2; NR_135157.2; NM_001042693.3	n.612C>T; c.193C>T; n.519C>T	p.L65F	missense	Uncertain Significance	Damaging	0	Probably Damaging	23.3	145825874	0.076
1	53153641	53153641	p32.3	A	G	SNV	Exonic	COA7	NM_023077.3; ENST00000371538.5	c.447T>C	p.S149S	synonymous	Uncertain Significance				11.59	867548158
1	53267545	53267545	p32.3	T	C	SNV	Exonic	ZYG11B	ENST00000545132.5; NM_024646.3; ENST00000294353.7	c.1540T>C	p.L514L	synonymous	Uncertain Significance				11.86	149164644	0.005
1	53364875	53364875	p32.3	C	T	SNV	Exonic; Intronic	ECHDC2	ENST00000358358.9; ENST00000371522.9; NM_001319958.2; NM_001198962.1; NM_018281.4; NM_001198961.2	c.724G>A; c.493G>A; c.631G>A; c.610-1719G>A	p.G211S; p.G242S; p.G165S	missense	Uncertain Significance	Damaging	0.04	Benign	19.38	111693547	0.253
1	53372199	53372199	p32.3	C	A	SNV	Exonic; Intronic	ECHDC2	ENST00000358358.9; ENST00000371522.9; NM_001319958.2; NM_001198962.1; NM_018281.4; NM_001198961.2	c.449G>T; c.364+1341G>T; c.226+1341G>T	p.R150L	missense	Uncertain Significance	Damaging	0		32	76267730	0.17
1	53446142	53446142	p32.3	C	T	SNV	Exonic	SCP2	NM_001193617.2; NM_002979.5; NM_001193599.2; ENST00000371514.8; ENST00000407246.6; NM_001193600.2; NM_001330587.2; ENST00000371509.8; NM_001007098.3; ENST00000371513.9; ENST00000528311.5	c.657C>T; c.900C>T; c.828C>T; c.768C>T	p.D276D; p.D300D; p.D256D; p.D219D	synonymous	Uncertain Significance				10.05	148423275	0.037	RCV000597467.3
1	53480704	53480704	p32.3	G	A	SNV	Exonic	SCP2	NM_001007100.3; NM_001193617.2; NM_002979.5; ENST00000435345.6; NM_001193599.2; ENST00000430330.6; NM_001007099.3; NM_001007250.3; ENST00000371514.8; ENST00000407246.6; NM_001193600.2; ENST00000408941.7; ENST00000371509.8; ENST00000488965.1; ENST00000528311.5	c.981G>A; c.1224G>A; c.1092G>A; c.12G>A; c.1152G>A	p.P327P; p.P364P; p.P384P; p.P4P; p.P408P	synonymous	Likely Benign				< 10	80253221	0.209	RCV000676002.5
1	53504735	53504735	p32.3	C	A	SNV	Intronic	SCP2	NM_001193617.2; NM_002979.5; NM_001007100.3; ENST00000435345.6; NM_001193599.2; ENST00000407246.6; NM_001007099.3; ENST00000430330.6; ENST00000371514.8; NM_001007250.3; NM_001193600.2; ENST00000408941.7; ENST00000371509.8; ENST00000488965.1; ENST00000528311.5	c.1336+17C>A; c.256+17C>A; c.1396+17C>A; c.127-8795C>A; c.1468+17C>A; c.1225+17C>A; c.247+17C>A			Likely Benign				< 10	79342751	0.221	RCV000676005.2
1	53535539	53535539	p32.3	C	T	SNV	Exonic	PODN	ENST00000618387.1; NM_001199080.4; ENST00000312553.10; NM_001199081.3; NM_153703.5; ENST00000371500.8; ENST00000673956.1	c.99C>T; c.12C>T	p.S33S; p.S4S	synonymous	Uncertain Significance				< 10	374230946	0.075
1	53535543	53535543	p32.3	G	T	SNV	Exonic	PODN	ENST00000618387.1; NM_001199080.4; ENST00000312553.10; NM_001199081.3; NM_153703.5; ENST00000371500.8; ENST00000673956.1	c.103G>T; c.16G>T	p.V35L; p.V6L	missense	Uncertain Significance				12.99	201290478	0.073
1	53535687	53535687	p32.3	C	A	SNV	Exonic	PODN	ENST00000618387.1; NM_001199080.4; ENST00000312553.10; NM_001199081.3; NM_153703.5; ENST00000371500.8; ENST00000673956.1	c.247C>A; c.160C>A	p.L54M; p.L83M	missense	Uncertain Significance				21.9	77859237	0.131
1	53535804	53535804	p32.3	G	A	SNV	Exonic	PODN	ENST00000618387.1; NM_001199080.4; ENST00000312553.10; NM_001199081.3; NM_153703.5; ENST00000371500.8; ENST00000673956.1	c.277G>A; c.364G>A	p.D93N; p.D122N	missense	Uncertain Significance				21.4	150801699	0.076
1	53574312	53574312	p32.3	A	T	SNV	Intronic	SLC1A7	ENST00000620347.5; NM_001287597.2; ENST00000371491.4; ENST00000371494.9; NR_109858.2; ENST00000611397.5; NM_001287595.2; NM_001287596.2; NM_006671.6	c.432-2866T>A; c.432-6T>A; c.216-2866T>A; n.621-2866T>A			Uncertain Significance				< 10	187385678	0.045
1	53600043	53600043	p32.3	A	G	SNV	Exonic; ncRNA	SLC1A7	ENST00000620347.5; NM_001287597.2; ENST00000371491.4; ENST00000371494.9; NR_109858.2; ENST00000611397.5; NM_001287595.2; NM_001287596.2; NM_006671.6	c.194T>C; n.383T>C	p.I65T	missense	Uncertain Significance	Damaging	0	Probably Damaging	25.5	774218957
1	53668063	53668063	p32.3	C	T	SNV	Exonic	CPT2	NM_001330589.2; NM_000098.3; ENST00000371486.4	c.302C>T	p.A101V	missense	Likely Benign	Tolerated	0.16	Benign	20.3	75939866	0.206	RCV000986322.1; RCV000544913.7; RCV001287164.1; RCV000124603.2	940027
1	53685978	53685978	p32.3	G	A	SNV	Exonic; Intronic; ncRNA	CZIB	NM_001304759.2; NM_017887.3; NM_001304760.2; ENST00000294360.5; NR_130897.2	c.45C>T; c.6+264C>T; n.104C>T	p.I15I	synonymous	Uncertain Significance				13.42	145724488	0.122
1	53686265	53686265	p32.3	G	A	SNV	5'UTR; ncRNA	CZIB	NM_001304759.2; NM_017887.3; NM_001304760.2; ENST00000294360.5; NR_130897.2	c.-18C>T; n.42C>T			Uncertain Significance				13.14	201250319	0.029
1	54059844	54059844	p32.3	G	A	SNV	Exonic	GLIS1	NM_001390837.1; NM_147193.4; NM_001390836.1; ENST00000312233.4; NM_001367484.1; NM_001390838.1	c.732C>T; c.1257C>T	p.N419N; p.N244N	synonymous	Uncertain Significance				< 10	142216816	0.083
1	54060049	54060049	p32.3	C	T	SNV	Exonic	GLIS1	NM_001390837.1; NM_147193.4; NM_001390836.1; ENST00000312233.4; NM_001367484.1; NM_001390838.1	c.1052G>A; c.527G>A	p.G176D; p.G351D	missense	Uncertain Significance	Tolerated	0.5	Benign	15.06	111547294	0.095
1	54060109	54060109	p32.3	A	G	SNV	Exonic	GLIS1	NM_001390837.1; NM_147193.4; NM_001390836.1; ENST00000312233.4; NM_001367484.1; NM_001390838.1	c.992T>C; c.467T>C	p.L331P; p.L156P	missense	Likely Benign	Damaging	0	Benign	22.7	139516969	0.595	RCV000951234.1
1	54060531	54060531	p32.3	C	T	SNV	Exonic	GLIS1	NM_001390837.1; NM_147193.4; NM_001390836.1; ENST00000312233.4; NM_001367484.1; NM_001390838.1	c.45G>A; c.570G>A	p.P190P; p.P15P	synonymous	Likely Benign				< 10	200955527	0.039
1	54233634	54233634	p32.3	A	G	SNV	ncRNA; 3'UTR	NDC1	NM_001168551.2; NM_018087.5; NR_033142.2; ENST00000371429.4	c.*9T>C; n.1948T>C			Uncertain Significance				15.59	150627210	0.137
1	54258913	54258913	p32.3	A	G	SNV	ncRNA; Exonic	NDC1	NM_001168551.2; NM_018087.5; NR_033142.2; ENST00000371429.4	n.1538T>C; c.1504T>C; c.1624T>C	p.F502L; p.F542L	missense	Uncertain Significance	Tolerated	1	Benign	23	149157348	0.08
1	54303894	54303894	p32.3	C	T	SNV	ncRNA; Exonic	NDC1	NM_001168551.2; NM_018087.5; NR_033142.2; ENST00000371429.4	c.41G>A; n.76G>A	p.R14Q	missense	Uncertain Significance	Tolerated	0.09	Benign	25.3	1039544081
1	54417909	54417909	p32.3	G	A	SNV	Exonic	LRRC42	ENST00000319223.8; ENST00000371370.8; NM_001256409.2; NM_052940.5	c.237G>A	p.E79E	synonymous	Uncertain Significance				11.64	143419007	0.027
1	54475967	54475967	p32.3	C	A	SNV	Exonic	LDLRAD1	NM_001276392.2; ENST00000420619.5; NM_001276395.2; ENST00000371360.2; NM_001276394.2; NM_001276393.2; NM_001010978.4; ENST00000371362.7; ENST00000545928.5	c.457G>T; c.340G>T; c.297G>T; c.190G>T; c.328G>T	p.M99I; p.E114*; p.E64*; p.E110*; p.E153*	stop gain; missense	Uncertain Significance				42	149768061	0.216
1	54554409	54554409	p32.3	C	T	SNV	ncRNA; Exonic	TCEANC2	NR_130900.2; ENST00000371331.1; ENST00000234827.6; NM_153035.3	n.435C>T; c.474C>T; c.384C>T	p.T128T; p.T158T	synonymous	Likely Benign				< 10	34933201	0.26
1	54605557	54605557	p32.3	G	T	SNV	Exonic	CDCP2	NM_201546.4; ENST00000371330.1; NM_001353655.2	c.986C>A	p.A329E	missense	Uncertain Significance	Damaging	0.05	Possibly Damaging	25.2	138864964	0.292
1	54618568	54618568	p32.3	G	T	SNV	Exonic	CDCP2	NM_201546.4; ENST00000371330.1; NM_001353655.2	c.28C>A	p.L10M	missense	Uncertain Significance			Possibly Damaging	23.5	139921302	0.091
1	54656440	54656440	p32.3	C	T	SNV	Exonic; ncRNA; Intronic	CYB5RL	NM_001353356.2; NR_148414.2; NM_001031672.4; NM_001353353.2; NM_001353354.2	c.328G>A; c.198+4652G>A; n.605G>A; c.-97-3028G>A	p.G110S	missense	Uncertain Significance	Damaging	0	Probably Damaging	24.7	191854671	0.014
1	54656448	54656448	p32.3	A	G	SNV	Exonic; ncRNA; Intronic	CYB5RL	NM_001353356.2; NR_148414.2; NM_001031672.4; NM_001353353.2; NM_001353354.2	n.597T>C; c.198+4644T>C; c.-97-3036T>C; c.320T>C	p.L107P	missense	Uncertain Significance	Damaging	0	Probably Damaging	24.5	770587611	0.003
1	54694168	54694168	p32.3	T	C	SNV	Intronic	SSBP3	NM_001009955.4; NM_018070.5; ENST00000357475.9; ENST00000371319.8; NM_145716.4	c.926-18A>G; c.1007-18A>G; c.947-18A>G			Uncertain Significance				< 10	185109028	0.049
1	54706615	54706615	p32.3	G	A	SNV	Exonic	SSBP3	NM_001009955.4; NM_018070.5; ENST00000357475.9; ENST00000371319.8; NM_145716.4	c.759C>T; c.819C>T; c.738C>T	p.G253G; p.G273G; p.G246G	synonymous	Likely Benign				< 10	115043214	0.168
1	54717369	54717369	p32.3	C	T	SNV	Intronic	SSBP3	NM_001009955.4; NM_018070.5; ENST00000357475.9; ENST00000371319.8; NM_145716.4	c.575-4G>A; c.515-4G>A; c.494-4G>A			Uncertain Significance				< 10	377178569	0.011
1	55050405	55050405	p32.3	C	T	SNV	Exonic	ACOT11	NM_015547.4; NM_147161.4; ENST00000343744.7; ENST00000371316.3	c.111C>T	p.D37D	synonymous	Likely Benign				< 10	6663891	0.369
1	55050489	55050489	p32.3	C	T	SNV	Exonic	ACOT11	NM_015547.4; NM_147161.4; ENST00000343744.7; ENST00000371316.3	c.195C>T	p.S65S	synonymous	Uncertain Significance				< 10	201412565	0.012
1	55065029	55065029	p32.3	G	A	SNV	Exonic	ACOT11	NM_015547.4; NM_147161.4; ENST00000343744.7; ENST00000371316.3	c.825G>A	p.P275P	synonymous	Uncertain Significance				< 10	115208360	0.097
1	55134536	55134536	p32.3	G	T	SNV	Exonic; ncRNA; 5'UTR	MROH7-TTC4; MROH7	NM_001039464.4; NR_111931.2; NR_037640.2; NR_037641.2; NR_026782.3; NR_037639.2; NM_001291332.2; ENST00000421030.7	c.-130G>T; n.1607G>T; n.1833G>T; c.1315G>T; n.1653G>T; n.1601G>T	p.V439F	missense	Uncertain Significance			Benign	14.66	74071881	0.13
1	55172128	55172128	p32.3	C	T	SNV	Exonic; ncRNA	MROH7-TTC4; MROH7	NM_001039464.4; NR_111931.2; NR_037640.2; NR_026782.3; NR_037641.2; NR_037639.2; NM_001291332.2; ENST00000421030.7	c.2139C>T; n.3807C>T; c.3585C>T; n.4119C>T; n.3923C>T; n.3722C>T; n.3887C>T	p.S1195S; p.S713S	synonymous	Uncertain Significance				< 10	148185761	0.087
1	55174748	55174748	p32.3	T	A	SNV	Exonic; ncRNA; Intronic	MROH7-TTC4; MROH7	NM_001039464.4; NR_111931.2; NR_037640.2; NR_026782.3; NR_037641.2; NR_037639.2; NM_001291332.2; ENST00000421030.7	c.3729T>A; c.2283T>A; n.4067T>A; n.3951T>A; n.4201+2538T>A; n.4031T>A; n.3866T>A	p.A761A; p.A1243A	synonymous	Uncertain Significance				< 10	145464693	0.075
1	55223693	55223693	p32.3	C	T	SNV	Exonic	PARS2	NM_152268.4; ENST00000371279.4	c.1142G>A	p.S381N	missense	Uncertain Significance	Tolerated	0.1	Probably Damaging	25	1356237031	0.003
1	55224346	55224346	p32.3	C	T	SNV	Exonic	PARS2	NM_152268.4; ENST00000371279.4	c.489G>A	p.T163T	synonymous	Likely Benign				< 10	145967472	0.091	RCV000968521.1; RCV000419798.1
1	55246936	55246936	p32.3	G	A	SNV	Exonic	TTC22	NM_001114108.2	c.1690C>T	p.R564C	missense	Uncertain Significance	Damaging	0.04	Benign	21.2	368550125	0.19						4645895	6.98
1	55272743	55272743	p32.3	A	G	SNV	Exonic	LEXM	ENST00000358193.7; NM_152607.3; NM_001110533.2; ENST00000371273.3	c.179A>G	p.Y60C	missense	Uncertain Significance	Tolerated	0.18	Possibly Damaging	14.71	115158797	0.27
1	55307498	55307498	p32.3	G	C	SNV	Exonic; 3'UTR	LEXM	ENST00000358193.7; NM_001110533.2; NM_152607.3; ENST00000371273.3	c.*51G>C; c.1209G>C	p.K403N	missense	Uncertain Significance	Damaging	0	Benign	22.3	574255393	0.022
1	55317935	55317935	p32.3	C	T	SNV	Exonic	DHCR24	NM_014762.4; ENST00000535035.6; ENST00000371269.9	c.1522G>A; c.1558G>A	p.D508N; p.D520N	missense	Likely Benign	Tolerated	0.35	Probably Damaging	30	11555496	0.225	RCV000892903.2; RCV001100577.1
1	55349318	55349318	p32.3	G	A	SNV	Exonic	DHCR24	NM_014762.4; ENST00000535035.6; ENST00000371269.9	c.360C>T	p.D120D	synonymous	Likely Benign				11.59	61733134	0.244	RCV000966753.2; RCV000288638.2
1	55352691	55352691	p32.3	G	A	SNV	Exonic	DHCR24	NM_014762.4; ENST00000535035.6; ENST00000371269.9	c.102C>T	p.F34F	synonymous	Uncertain Significance				16.27	144149165	0.009	RCV000173440.2
1	55352712	55352712	p32.3	G	A	SNV	Exonic	DHCR24	NM_014762.4; ENST00000535035.6; ENST00000371269.9	c.81C>T	p.L27L	synonymous	Uncertain Significance				20.6	140995590	0.111	RCV000359802.1; RCV000404427.2; RCV000965553.3
1	55452045	55452045	p32.3	T	A	SNV	Exonic	TMEM61	NM_182532.3; ENST00000371268.4	c.291T>A	p.P97P	synonymous	Likely Benign				< 10	150272316	0.079
1	55509533	55509533	p32.3	T	C	SNV	Intronic; 5'UTR; Exonic	PCSK9	NR_110451.2; ENST00000302118.5; NM_174936.4; ENST00000673903.1	n.182+3457T>C; c.225T>C; c.-151T>C	p.P75P	synonymous	Likely Benign				< 10	146563151	0.057	RCV000586453.4; RCV001086878.2; RCV000776137.1	6284899
1	55524248	55524248	p32.3	C	T	SNV	ncRNA; Exonic	PCSK9	NR_110451.2; ENST00000302118.5; NM_174936.4; ENST00000673903.1	n.1038C>T; c.1431C>T; c.1056C>T	p.C352C; p.C477C	synonymous	Likely Benign				< 10	28362268	0.156	RCV001080375.3; RCV000589036.4; RCV000776072.1; RCV001097683.1
1	55527240	55527240	p32.3	C	G	SNV	Intronic	PCSK9	NR_110451.2; ENST00000302118.5; NM_174936.4; ENST00000673903.1	n.1470+11C>G; c.1863+11C>G; c.1488+11C>G			Likely Benign				< 10	72646526	0.176	RCV000776504.1
1	55545240	55545240	p32.3	T	C	SNV	Exonic	USP24	NM_015306.3	c.7171A>G	p.M2391V	missense	Uncertain Significance				11.9	116203669	0.117
1	55625328	55625328	p32.3	T	C	SNV	Exonic	USP24	NM_015306.3	c.1024A>G	p.I342V	missense	Uncertain Significance				19.89	150880897	0.139
1	55627878	55627878	p32.3	C	T	SNV	Exonic	USP24	NM_015306.3	c.987G>A	p.V329V	synonymous	Uncertain Significance				10.89	140813382	0.091
1	55643674	55643674	p32.3	T	C	SNV	Exonic	USP24	NM_015306.3	c.456A>G	p.K152K	synonymous	Uncertain Significance				10.77	139709300	0.093
1	57351581	57351581	p32.2	C	T	SNV	Intronic	C8A	NM_000562.3; ENST00000361249.4	c.856-19C>T			Likely Benign				< 10	140619602	0.162	RCV001523456.1
1	57406513	57406513	p32.2	G	A	SNV	Intronic	C8B	ENST00000535057.5; NM_000066.4; ENST00000371237.9; ENST00000543257.5; NM_001278543.2; NM_001278544.2	c.1398+9C>T; c.1212+9C>T; c.1242+9C>T			Likely Benign				< 10	116348786	0.071	RCV001516652.1
1	57415263	57415263	p32.2	G	A	SNV	Exonic	C8B	ENST00000535057.5; NM_000066.4; ENST00000371237.9; ENST00000543257.5; NM_001278543.2; NM_001278544.2	c.829C>T; c.643C>T; c.673C>T	p.H225Y; p.H215Y; p.H277Y	missense	Uncertain Significance			Benign	< 10	147387692	0.006
1	57422575	57422575	p32.2	A	G	SNV	Exonic	C8B	ENST00000535057.5; NM_000066.4; ENST00000371237.9; ENST00000543257.5; NM_001278543.2; NM_001278544.2	c.72T>C; c.258T>C; c.102T>C	p.Y86Y; p.Y24Y; p.Y34Y	synonymous	Likely Benign				< 10	113900156	0.06	RCV001517557.1
1	57499233	57499233	p32.2	A	G	SNV	Exonic; Intronic	DAB1	NM_001365792.1; NM_001379462.1; NM_001379461.1; NM_001353983.2; NM_021080.5; ENST00000420954.6; NM_001353986.2; NM_001365793.1; NM_001353985.2	c.632T>C; c.718-7517T>C; c.724-7517T>C	p.F211S	missense	Uncertain Significance				15.16	556974571	0.016
1	57537331	57537331	p32.2	T	C	SNV	Intronic	DAB1	NM_001365792.1; NM_001379462.1; NM_001379461.1; NM_001353983.2; NM_021080.5; ENST00000420954.6; NM_001353986.2; NM_001365793.1; NM_001353985.2	c.439-17A>G			Likely Benign				< 10	147565532	0.179
1	59004602	59004602	p32.1	A	C	SNV	Intronic; Exonic	OMA1; DAB1	ENST00000371226.8; NM_001379461.1; NM_145243.5	c.365T>G; c.-730+7773T>G	p.L122W	missense	Uncertain Significance	Tolerated	0.18	Benign	< 10	112971497	0.061
1	59134650	59134650	p32.1	T	C	SNV	Intronic; Promoter	MYSM1	ENST00000655340.1; ENST00000622766.1; NM_001085487.3; ENST00000472487.6	c.1716+6A>G; c.-564A>G			Likely Benign				< 10	181879578	0.138	RCV001514112.1
1	59148002	59148002	p32.1	C	A	SNV	Exonic	MYSM1	ENST00000655340.1; NM_001085487.3; ENST00000472487.6	c.714G>T	p.Q238H	missense	Uncertain Significance	Tolerated	0.12	Benign	< 10	201248747	0.013
1	59165736	59165736	p32.1	A	C	SNV	5'UTR; Promoter	MYSM1	ENST00000655340.1; NM_001085487.3; ENST00000472487.6	c.-12T>G			Uncertain Significance				18.93	199638047	0.164
1	59787401	59787401	p32.1	T	C	SNV	Exonic; Intronic; ncRNA; 5'UTR	FGGY	NM_001350794.2; NM_001113411.2; ENST00000371212.5; NM_001350798.2; NM_001350793.2; ENST00000371218.8; NR_103473.2; NM_001350797.2; NM_001350792.2; NM_001350796.2; NM_018291.5; NM_001244714.2; NM_001350791.2; NM_001350795.2; NM_001350790.2; NM_001350799.2; ENST00000303721.12	n.268T>C; c.-45T>C; c.-71T>C; c.180T>C; c.-135-18229T>C; c.-156T>C	p.A60A	synonymous	Uncertain Significance				< 10	760151330	0.001
1	59922670	59922670	p32.1	G	T	SNV	Exonic; ncRNA	FGGY	NM_001350794.2; NM_001113411.2; ENST00000371212.5; NM_001350798.2; NM_001350793.2; ENST00000371218.8; NM_001350797.2; NM_001350792.2; NR_103473.2; NM_001350796.2; NM_018291.5; NM_001244714.2; NM_001350791.2; NM_001350795.2; NM_001350799.2; NM_001350790.2; ENST00000303721.12	c.592G>T; c.190G>T; c.328G>T; c.424G>T; c.256G>T; n.680G>T	p.A142S; p.A198S; p.A110S; p.A86S; p.A64S	missense	Uncertain Significance	Tolerated	0.16	Benign	21.8	769701982	0
1	60370671	60370671	p32.1	C	T	SNV	ncRNA; Intronic; Exonic	CYP2J2	NM_000775.4; NR_134982.2; NR_134981.2; ENST00000371204.4	n.1090G>A; c.1063G>A; n.1030+2787G>A	p.A355T	missense	Uncertain Significance	Damaging	0.01	Benign	21.5	144856672	0.175
1	60377925	60377925	p32.1	T	C	SNV	ncRNA; Exonic	CYP2J2	NM_000775.4; NR_134982.2; NR_134981.2; ENST00000371204.4	c.432A>G; n.459A>G	p.A144A	synonymous	Uncertain Significance				< 10	535842962
1	60499276	60499276	p32.1	T	C	SNV	Exonic	C1orf87	ENST00000371201.3; NM_152377.3	c.901A>G	p.N301D	missense	Likely Benign	Tolerated	0.08	Benign	< 10	17120025	0.284
1	62190770	62190770	p31.3	C	T	SNV	Exonic; ncRNA	TM2D1	NM_032027.3; NR_135161.2; NR_135160.2; ENST00000294613.9; NR_135162.2	n.44G>A; c.23G>A	p.G8D	missense	Uncertain Significance			Benign	14.79	201828555	0.143
1	62253601	62253601	p31.3	T	C	SNV	Exonic	PATJ	NM_176877.5; ENST00000642238.2; NM_001350145.3	c.1025T>C	p.L342S	missense	Likely Benign			Benign	13.32	115241683	0.211	RCV000964812.1
1	62299410	62299410	p31.3	C	G	SNV	Exonic	PATJ	NM_176877.5; ENST00000642238.2; NM_001350145.3	c.2065C>G	p.L689V	missense	Uncertain Significance			Probably Damaging	23.2	112976879	0.159
1	62644078	62644078	p31.3	G	A	SNV	Intronic	PATJ	ENST00000635137.1	c.1731-17G>A			Likely Benign				< 10	115905609	0.123
1	62644140	62644140	p31.3	G		Deletion	Exonic	PATJ	ENST00000635137.1	c.1779delG	p.*594fs*?	frameshift	Likely Benign				9.091	151313382	0.271
1	62676060	62676060	p31.3	A	G	SNV	Promoter; Exonic	Y_RNA; L1TD1	ENST00000498273.2; ENST00000363304.1; NM_001164835.2; NM_019079.5	c.1614A>G; n.-1169A>G	p.T538T	synonymous	Likely Benign				< 10	41309167	0.264
1	62676795	62676795	p31.3	T	C	SNV	Promoter; Exonic	Y_RNA; L1TD1	ENST00000498273.2; ENST00000363304.1; NM_001164835.2; NM_019079.5	n.-434T>C; c.2349T>C	p.I783I	synonymous	Uncertain Significance				< 10	2457825	0.097
1	62734033	62734033	p31.3	G	T	SNV	Exonic	KANK4	ENST00000354381.3; ENST00000371150.5; NM_181712.5; ENST00000371153.9; NM_001320269.2	c.225C>A; c.2157C>A; c.273C>A	p.G75G; p.G719G; p.G91G	synonymous	Likely Benign				< 10	141699992	0.028
1	62739919	62739919	p31.3	G	A	SNV	Promoter; Exonic; Intronic	KANK4	ENST00000354381.3; ENST00000371150.5; NM_181712.5; ENST00000371153.9; NM_001320269.2	c.-2690C>T; c.17-2658C>T; c.857C>T	p.P286L	missense	Likely Benign	Tolerated	0.17	Benign	18.03	72925715	0.218	RCV000883005.1
1	62916310	62916310	p31.3	A	G	SNV	Exonic	USP1	NM_001017415.2; NM_001017416.2; NM_003368.5; ENST00000339950.5	c.2016A>G	p.Q672Q	synonymous	Likely Benign				< 10	114296661	0.209	RCV000898217.1
1	63090963	63090963	p31.3	T	C	SNV	Exonic	DOCK7	NM_001272000.2; NM_001271999.2; ENST00000340370.10; NM_001272001.2; ENST00000454575.6; NM_001272002.2; NM_001367561.1; ENST00000404627.3; NM_033407.4; NM_001330614.2	c.1392A>G	p.P464P	synonymous	Likely Benign				11.37	116172511	0.193	RCV001288942.1; RCV000528407.5
1	63902565	63902565	p31.3	A	T	SNV	Exonic	ALG6	NM_013339.4	c.1398A>T	p.L466L	synonymous	Likely Benign				< 10	140158304	0.053	RCV000424214.2; RCV000874946.4
1	64011667	64011667	p31.3	A	T	SNV	Exonic	EFCAB7	NM_032437.4; ENST00000371088.5	c.885A>T	p.Q295H	missense	Uncertain Significance	Tolerated	1	Benign	< 10	61744574	0.017
1	64097344	64097344	p31.3	G	A	SNV	Exonic; 5'UTR	PGM1	NM_001172819.2; ENST00000540265.5; ENST00000650546.1; NM_001172818.1; ENST00000371084.8; NM_002633.3; ENST00000371083.4	c.627G>A; c.-19G>A; c.573G>A	p.S209S; p.S191S	synonymous	Likely Benign				< 10	112502842	0.128	RCV000647743.4; RCV000440882.2
1	64475059	64475059	p31.3	G	T	SNV	Intronic	ROR1	NM_001083592.2; ENST00000371080.5; NM_005012.4; ENST00000371079.6	c.163+11G>T			Uncertain Significance				15.82	140839680	0.077
1	65138892	65138892	p31.3	C	T	SNV	Exonic	CACHD1	ENST00000650260.1; NM_001293274.2; NM_020925.4; ENST00000651257.2	c.2160C>T; c.2562C>T; c.1674C>T	p.I720I; p.I558I; p.I854I	synonymous	Uncertain Significance				< 10
1	65849954	65849954	p31.3	A	G	SNV	Exonic	DNAJC6	ENST00000395325.7; NM_001256865.2; NM_001256864.2; ENST00000263441.11; ENST00000371069.5; NM_014787.4	c.574A>G; c.535A>G; c.745A>G	p.I179V; p.I192V; p.I249V	missense	Likely Benign	Activating	1	Benign	< 10	149588872	0.137	RCV000651848.4	727640
1	66070935	66070935	p31.3	G	A	SNV	Intronic	LEPR	NM_001003680.3; ENST00000349533.11; NM_001198688.1; NM_001198689.2; NM_001003679.3; ENST00000344610.12; NM_002303.6; ENST00000616738.4; ENST00000371060.7; NM_001198687.2; ENST00000371059.7	c.1603+15G>A			Uncertain Significance				< 10	769140019	0.002
1	66838257	66838257	p31.3	A	T	SNV	Exonic	PDE4B	NM_001037340.3; ENST00000329654.8; ENST00000371045.9; NM_001037341.2; NM_001297442.2; ENST00000423207.6; NM_001037339.2; ENST00000480109.2; NM_001297440.2; NM_002600.4; NM_001297441.1	c.1882A>T; c.1831A>T; c.2107A>T; c.1408A>T; c.1591A>T; c.2062A>T	p.S688C; p.S611C; p.S531C; p.S470C; p.S703C; p.S628C	missense	Likely Benign	Damaging	0.01	Benign	23.1	2227297	0.127	RCV000903565.2
1	67327846	67327846	p31.3	C	T	SNV	Exonic	DNAI4	NM_207014.3; ENST00000371026.8; NM_024763.5; ENST00000371023.7	c.1080G>A	p.G360G	synonymous	Likely Benign				< 10	148094747	0.031
1	67436618	67436618	p31.3	A	C	SNV	Exonic	MIER1	ENST00000371018.7; NM_020948.4; NM_001077700.3; NM_001146113.2; NM_001146110.2; ENST00000371016.5; NM_001077704.3; NM_001146111.2; NM_001077703.3; NM_001077702.3; NM_001350530.2; ENST00000401042.7; ENST00000371014.5; ENST00000357692.6; NM_001146112.2; NM_001077701.3; ENST00000355356.3; ENST00000401041.6	c.792A>C; c.660A>C; c.900A>C; c.1011A>C; c.552A>C; c.741A>C	p.G337G; p.G247G; p.G300G; p.G264G; p.G220G; p.G184G	synonymous	Uncertain Significance				11.76	115270426	0.198
1	67558858	67558858	p31.3	C	T	SNV	ncRNA; Exonic; 3'UTR	C1orf141	NM_001276351.2; ENST00000371006.5; NR_075077.2; NM_001276352.2	c.*405G>A; c.1033G>A; n.1346G>A	p.G345R	missense	Uncertain Significance	Damaging	0.02		19.73	142111920	0.01
1	67635206	67635206	p31.3	A	C	SNV	5'UTR; Exonic	IL23R	ENST00000347310.10; NM_144701.3; ENST00000637002.1	c.-353A>C; c.252A>C	p.T84T	synonymous	Likely Benign				< 10	11465779	0.063	RCV000955725.1
1	67838321	67838321	p31.3	C	A	SNV	Exonic; Intronic; ncRNA	IL12RB2	ENST00000541374.6; NM_001258214.1; ENST00000544434.5; ENST00000262345.5; NM_001374259.2; ENST00000371000.5; ENST00000674203.2; NM_001258216.1; ENST00000648487.1; NM_001319233.1; NM_001258215.1; NR_047584.1; NR_047583.1	c.1572C>A; c.1459+4613C>A; n.2212C>A; n.2198+104C>A	p.G524G	synonymous	Likely Benign				< 10	17129906	0.205	RCV000892457.3
1	67890609	67890609	p31.3	G	A	SNV	Exonic	SERBP1	ENST00000361219.11; NM_001018069.2; ENST00000370994.8; ENST00000370990.5; NM_001018068.2; NM_001018067.2; ENST00000370995.6; NM_015640.4	c.657C>T; c.639C>T	p.S213S; p.S219S	synonymous	Uncertain Significance				12.19	113349137	0.2
1	68897001	68897001	p31.3	C	G	SNV	Exonic	RPE65	ENST00000262340.6; NM_000329.3	c.1302G>C	p.A434A	synonymous	Likely Benign				< 10	62636301	0.29	RCV001096914.1; RCV000085163.3; RCV001096913.1; RCV001287742.1; RCV000665554.3	208868
1	68910310	68910310	p31.2	A	G	SNV	Exonic	RPE65	ENST00000262340.6; NM_000329.3	c.399T>C	p.L133L	synonymous	Likely Benign				< 10	59257923	0.222	RCV001081695.2; RCV000085197.3; RCV001102525.1; RCV001102526.1; RCV001275331.1	797856
1	70300517	70300517	p31.1	C	T	SNV	Exonic; 5'UTR	LRRC7	NM_001366837.3; ENST00000370958.5; NM_001366842.1; NM_001366838.3; NM_001366836.3; NM_001370785.2; NM_001330635.3; ENST00000651989.2; NM_001366841.1; NM_001350216.3; NM_001366840.1; ENST00000415775.2; NM_001366839.3	c.558C>T; c.555C>T; c.-965C>T; c.456C>T; c.612C>T	p.D152D; p.D185D; p.D186D; p.D204D	synonymous	Uncertain Significance				11.05	35373978	0.215
1	70503955	70503955	p31.1	G	A	SNV	Exonic	LRRC7	NM_001366838.3; NM_001370785.2; ENST00000651989.2; NM_001330635.3; NM_001366841.1; NM_001350216.3; ENST00000415775.2; NM_001366839.3	c.2289G>A; c.186G>A; c.2349G>A; c.2451G>A; c.2448G>A	p.G816G; p.G817G; p.G62G; p.G783G; p.G763G	synonymous	Uncertain Significance				< 10
1	70504320	70504320	p31.1	A	G	SNV	Exonic	LRRC7	NM_001366838.3; NM_001370785.2; ENST00000651989.2; NM_001330635.3; NM_001366841.1; NM_001350216.3; ENST00000415775.2; NM_001366839.3	c.2813A>G; c.551A>G; c.2654A>G; c.2816A>G; c.2714A>G	p.N885S; p.N939S; p.N938S; p.N905S; p.N184S	missense	Uncertain Significance				15.11	770157708	0
1	70614216	70614216	p31.1	C	T	SNV	Exonic	LRRC40	ENST00000370952.4; NM_017768.5	c.1657G>A	p.D553N	missense	Uncertain Significance	Tolerated	0.67	Possibly Damaging	25.4	1050930795	0.001
1	70646822	70646822	p31.1	T	C	SNV	Promoter; Exonic	LRRC40; RN7SL242P	ENST00000491451.2; ENST00000370952.4; NM_017768.5	n.-699A>G; c.608A>G	p.N203S	missense	Uncertain Significance	Tolerated	0.48	Possibly Damaging	22.9	141616590	0.058
1	70654870	70654870	p31.1	C	T	SNV	Exonic	LRRC40	ENST00000370952.4; NM_017768.5	c.238G>A	p.E80K	missense	Uncertain Significance	Tolerated	0.1	Possibly Damaging	25.5	144722179	0.358
1	70896038	70896038	p31.1	T	C	SNV	Exonic	CTH	ENST00000346806.2; NM_001902.6; ENST00000411986.6; NM_001190463.2; ENST00000370938.8; NM_153742.5	c.589T>C; c.553T>C; c.685T>C	p.C197R; p.C185R; p.C229R	missense	Uncertain Significance	Tolerated	0.51	Benign	16.39	145785987	0.035	RCV001097217.1
1	71873219	71873219	p31.1	G	A	SNV	Exonic	NEGR1	ENST00000357731.10; ENST00000306821.3; NM_173808.3	c.591C>T; c.975C>T	p.S325S; p.S197S	synonymous	Likely Benign				11.07	144477627	0.179	RCV000955727.2
1	74648381	74648381	p31.1	T	C	SNV	Exonic	LRRIQ3	ENST00000370911.7; NM_001322315.2; NM_001105659.2	c.414A>G	p.K138K	synonymous	Uncertain Significance				11.67	201957808	0.002
1	74664050	74664050	p31.1	A	G	SNV	Promoter; Intronic	LRRIQ3; FPGT; FPGT-TNNI3K	ENST00000370911.7; ENST00000534056.5; ENST00000557284.7; ENST00000370894.9; NM_003838.5; NM_001112808.3; ENST00000370893.1; NM_001322315.2; ENST00000370899.7; NM_001199327.2; ENST00000370895.5; ENST00000370898.8; NM_001199328.3; ENST00000467578.7; NM_001199329.3; NM_001105659.2	c.-371T>C; c.82+6A>G			Uncertain Significance				< 10	181548075	0.092
1	74905278	74905278	p31.1	C	T	SNV	Exonic	TNNI3K; FPGT-TNNI3K	NM_015978.3; ENST00000557284.7; NM_001112808.3; ENST00000370899.7; NM_001199327.2; ENST00000326637.8	c.1983C>T; c.2286C>T	p.G661G; p.G762G	synonymous	Uncertain Significance				< 10	187479159	0.007
1	74930378	74930378	p31.1	G	A	SNV	Exonic; Intronic	TNNI3K; FPGT-TNNI3K	NM_015978.3; ENST00000557284.7; NM_001112808.3; ENST00000370899.7; NM_001199327.2; ENST00000326637.8	c.2121+1144G>A; c.2424+1144G>A; c.2484G>A	p.K828K	synonymous	Likely Benign				< 10	530200325	0.02
1	74941071	74941071	p31.1	G	C	SNV	Exonic; Intronic	TNNI3K; FPGT-TNNI3K; LRRC53	NM_015978.3; NM_001382280.1; ENST00000557284.7; NM_001112808.3; NM_001364666.2; ENST00000326637.8	c.1328C>G; c.2424+11837G>C; c.2121+11837G>C; c.1232C>G	p.T411R; p.T443R	missense	Uncertain Significance				< 10	45516996	0.032
1	74941282	74941282	p31.1	T	C	SNV	Exonic; Intronic	TNNI3K; FPGT-TNNI3K; LRRC53	NM_015978.3; NM_001382280.1; ENST00000557284.7; NM_001112808.3; NM_001364666.2; ENST00000326637.8	c.1117A>G; c.2424+12048T>C; c.2121+12048T>C; c.1021A>G	p.R373G; p.R341G	missense	Uncertain Significance				10.23	45622634	0.033
1	74946111	74946111	p31.1	G	A	SNV	Exonic; Intronic	TNNI3K; FPGT-TNNI3K; LRRC53	NM_015978.3; NM_001382280.1; ENST00000557284.7; NM_001112808.3; NM_001364666.2; ENST00000326637.8	c.2425-8762G>A; c.534C>T; c.2122-8762G>A; c.630C>T	p.S210S; p.S178S	synonymous	Likely Benign				< 10	61729312	0.221
1	74946376	74946376	p31.1	A	T	SNV	Exonic; Intronic	TNNI3K; FPGT-TNNI3K; LRRC53	NM_015978.3; NM_001382280.1; ENST00000557284.7; NM_001112808.3; NM_001364666.2; ENST00000326637.8	c.2122-8497A>T; c.365T>A; c.2425-8497A>T; c.269T>A	p.L122Q; p.L90Q	missense	Uncertain Significance				22.2	563775522	0.038
1	75038648	75038648	p31.1	G	A	SNV	Exonic	ERICH3	NM_001002912.5	c.2746C>T	p.L916F	missense	Likely Benign	Tolerated	0.21	Benign	< 10	114682824	0.165
1	75038836	75038836	p31.1	T	A	SNV	Exonic	ERICH3	NM_001002912.5	c.2558A>T	p.E853V	missense	Likely Benign	Damaging	0.01	Benign	< 10	116636724	0.245
1	75038880	75038880	p31.1	C	G	SNV	Exonic	ERICH3	NM_001002912.5	c.2514G>C	p.G838G	synonymous	Likely Benign				< 10	60711359	0.084
1	75107155	75107155	p31.1	A	T	SNV	Intronic	ERICH3	NM_001002912.5	c.316-12T>A			Uncertain Significance				16.34	115687850	0.156
1	75172642	75172642	p31.1	G	A	SNV	Exonic	CRYZ	ENST00000370871.7; ENST00000370872.7; ENST00000340866.10; NM_001889.4; NM_001134759.2; NM_001130042.2; ENST00000417775.5; NM_001130043.2	c.358C>T; c.769C>T; c.667C>T	p.R223*; p.R257*; p.R120*	stop gain	Uncertain Significance				37	142760907	0.009
1	75602300	75602300	p31.1	A	C	SNV	Exonic	LHX8	ENST00000294638.9; ENST00000356261.3; NM_001256114.2; NM_001001933.1	c.31A>C; c.1A>C	p.M1L; p.M11L	missense; start loss	Uncertain Significance			Benign	22.6	116590034	0.109
1	75622730	75622730	p31.1	G	A	SNV	Exonic	LHX8	ENST00000294638.9; ENST00000356261.3; NM_001001933.1; NM_001256114.2	c.933G>A; c.963G>A	p.T321T; p.T311T	synonymous	Uncertain Significance				< 10	145367581	0.012
1	75716928	75716928	p31.1	G	A	SNV	Exonic	SLC44A5	NM_152697.5; ENST00000370859.7; ENST00000370855.5; NM_001320287.2; NM_001320283.2; NM_001130058.2; NM_001320285.2	c.186C>T; c.312C>T; c.294C>T	p.S104S; p.S98S; p.S62S	synonymous	Likely Benign				< 10	114123196	0.186
1	76251949	76251949	p31.1	T	A	SNV	Promoter; 5'UTR; ncRNA	SNORD45A; RABGGTB; SNORD45C	NM_004582.4; NR_002749.1; ENST00000319942.8; NR_073562.1; ENST00000383893.1; NR_003042.1; ENST00000384512.1; ENST00000370826.3	n.-808T>A; n.-1625T>A; c.-8T>A; n.71T>A			Uncertain Significance				10.01	141344826	0.292
1	76251975	76251975	p31.1	G	T	SNV	Promoter; Intronic	SNORD45A; RABGGTB; SNORD45C	NM_004582.4; NR_002749.1; ENST00000319942.8; NR_073562.1; ENST00000383893.1; NR_003042.1; ENST00000384512.1; ENST00000370826.3	c.3+16G>T; n.-1599G>T; n.81+16G>T; n.-782G>T			Likely Benign				< 10	113892674	0.256
1	76262850	76262850	p31.1	G	A	SNV	Exonic	MSH4	NM_002440.4; ENST00000263187.4	c.180G>A	p.A60A	synonymous	Uncertain Significance				< 10	142461396	0.008
1	76384785	76384785	p31.1	G	A	SNV	ncRNA; Exonic	ASB17	ENST00000284142.7; NM_080868.3; NR_026546.3	c.740C>T; n.791C>T	p.S247L	missense	Uncertain Significance			Benign	22.6	139489809	0.043
1	78280825	78280825	p31.1	C	T	SNV	Exonic	MIGA1	NM_001363586.1; ENST00000646892.1; NM_001270384.1; NM_198549.3; NM_001363583.1; ENST00000645756.1; ENST00000370791.7; NM_001363584.1; ENST00000443751.3; ENST00000645526.1; ENST00000643390.1; ENST00000642959.1	c.804C>T; c.708C>T; c.720C>T	p.L240L; p.L268L; p.L236L	synonymous	Likely Benign				< 10	34847707	0.375
1	78432717	78432717	p31.1	A	G	SNV	Intronic	FUBP1	NM_001376057.1; NR_146539.2; NM_001376056.1; NM_001376055.1; NM_001303433.2; NM_003902.5; ENST00000370768.7; NR_146540.2; NR_130152.2	c.340+16T>C; c.406+16T>C; n.411+16T>C; c.403+16T>C; n.408+16T>C; c.343+16T>C			Uncertain Significance				11.92	201828387	0.287
1	78511869	78511869	p31.1	A	T	SNV	Intronic; Exonic	GIPC2	NM_001304725.2; ENST00000370759.4; NM_017655.6	c.91A>T; c.18+1091A>T	p.S31C	missense	Uncertain Significance	Damaging	0.04	Benign	15.77	78974795	0.066
1	78958770	78958770	p31.1	C	T	SNV	Exonic	PTGFR	ENST00000370757.8; NM_000959.4; NM_001039585.2; ENST00000370758.5; ENST00000370756.3	c.342C>T	p.C114C	synonymous	Uncertain Significance				12.01	76806235	0.081
1	78958893	78958893	p31.1	G	A	SNV	Exonic	PTGFR	ENST00000370757.8; NM_000959.4; NM_001039585.2; ENST00000370758.5; ENST00000370756.3	c.465G>A	p.M155I	missense	Uncertain Significance	Activating	0.96	Benign	15.26	116802591	0.367
1	78963564	78963564	p31.1	C	T	SNV	Exonic; Intronic	PTGFR	ENST00000370757.8; NM_000959.4; NM_001039585.2; ENST00000370758.5; ENST00000370756.3	c.798+4338C>T; c.804C>T	p.Y268Y	synonymous	Likely Benign				< 10	12097116	0.138
1	79093737	79093737	p31.1	G	A	SNV	Exonic; Intronic	IFI44L	NM_001375647.1; NM_001375648.1; ENST00000370751.10; NM_001375649.1; NM_001375650.1; NM_006820.4; NM_001375646.1	c.137G>A; c.-100-899G>A; c.-296-899G>A; c.-51-7285G>A	p.R46H	missense	Uncertain Significance	Tolerated	0.23	Benign	< 10	149202070	0.02
1	79101114	79101114	p31.1	A	G	SNV	Exonic	IFI44L	NM_001375647.1; NM_001375648.1; ENST00000370751.10; NM_001375649.1; NM_001375650.1; NM_006820.4; NM_001375646.1	c.42A>G; c.816A>G	p.A272A; p.A14A	synonymous	Uncertain Significance				< 10	142599489	0.024
1	79102844	79102844	p31.1	T	A	SNV	Exonic	IFI44L	NM_001375647.1; NM_001375648.1; ENST00000370751.10; NM_001375649.1; NM_001375650.1; NM_006820.4; NM_001375646.1	c.230T>A; c.1004T>A	p.M335K; p.M77K	missense	Uncertain Significance	Damaging	0	Probably Damaging	22.9	145631492	0.036
1	79107287	79107287	p31.1	G	A	SNV	Exonic	IFI44L	NM_001375647.1; NM_001375648.1; ENST00000370751.10; NM_001375649.1; NM_001375650.1; NM_006820.4; NM_001375646.1	c.543G>A; c.1317G>A	p.E181E; p.E439E	synonymous	Likely Benign				< 10	34615115	0.219	RCV000894403.1
1	79125064	79125064	p31.1	G	T	SNV	ncRNA; Exonic	IFI44	NR_135640.1; NM_006417.5; ENST00000370747.9; NR_135641.1	c.908G>T; n.568G>T; n.1035G>T	p.R303I	missense	Uncertain Significance	Damaging	0	Probably Damaging	19.33	141237245	0.044
1	82456154	82456154	p31.1	G	A	SNV	Exonic; ncRNA; 3'UTR	ADGRL2	NM_001393350.1; NM_001350699.2; NM_001366008.2; NM_001297705.3; ENST00000370713.5; NM_012302.5; ENST00000674168.1; NM_001297704.3; NM_001350698.2; NM_001393351.1; NM_001366009.2; NR_171658.1; NM_001366006.2; NM_001366005.2; NM_001366007.2; NM_001297706.3; ENST00000674419.1; NM_001366004.2; ENST00000674307.1; NM_001366003.2; ENST00000674208.1; NM_001393349.1; ENST00000319517.10; ENST00000370715.5;…	c.3576G>A; n.4056G>A; c.3717G>A; c.3582G>A; c.3738G>A; c.*127G>A; c.3537G>A; c.*109G>A; c.3735G>A; c.*95G>A; c.*81G>A; c.*68G>A; c.3666G>A	p.S1192S; p.S1194S; p.S1179S; p.S1245S; p.S1222S; p.S1246S; p.S1239S	synonymous	Uncertain Significance				< 10	138002220	0.056
1	82456308	82456308	p31.1	G	A	SNV	Exonic; ncRNA; 3'UTR	ADGRL2	NM_001393350.1; NM_001350699.2; NM_001366008.2; NM_001297705.3; ENST00000370713.5; NM_012302.5; ENST00000674168.1; NM_001297704.3; NM_001350698.2; NM_001393351.1; NM_001366009.2; NR_171658.1; NM_001366006.2; NM_001366005.2; NM_001366007.2; NM_001297706.3; ENST00000674419.1; NM_001366004.2; ENST00000674307.1; NM_001366003.2; ENST00000674208.1; NM_001393349.1; ENST00000319517.10; ENST00000370715.5;…	c.*263G>A; c.3820G>A; c.3691G>A; c.3889G>A; c.3730G>A; c.3892G>A; c.3736G>A; c.3871G>A; c.*222G>A; c.*249G>A; c.*281G>A; n.4210G>A; c.*235G>A	p.V1246I; p.V1291I; p.V1298I; p.V1244I; p.V1274I; p.V1231I; p.V1297I	missense	Uncertain Significance	Tolerated	0.15	Benign	15.22	146536254	0.105
1	82456501	82456501	p31.1	A	G	SNV	Exonic; ncRNA; 3'UTR	ADGRL2	NM_001393350.1; NM_001350699.2; NM_001366008.2; NM_001297705.3; ENST00000370713.5; NM_012302.5; ENST00000674168.1; NM_001297704.3; NM_001350698.2; NM_001393351.1; NM_001366009.2; NR_171658.1; NM_001366006.2; NM_001366005.2; NM_001366007.2; NM_001297706.3; ENST00000674419.1; NM_001366004.2; ENST00000674307.1; NM_001366003.2; ENST00000674208.1; NM_001393349.1; ENST00000319517.10; ENST00000370715.5;…	c.4013A>G; c.*456A>G; c.4082A>G; c.*442A>G; c.3929A>G; c.3923A>G; c.4085A>G; c.*428A>G; c.*415A>G; c.4064A>G; c.*474A>G; c.3884A>G; n.4403A>G	p.Y1295C; p.Y1362C; p.Y1361C; p.Y1355C; p.Y1310C; p.Y1338C; p.Y1308C	missense	Uncertain Significance	Tolerated	0.36	Benign	22.6	74098542	0.234
1	84876585	84876585	p31.1	A	G	SNV	5'UTR; Exonic	DNASE2B	ENST00000370662.3; NM_021233.3; NM_058248.2; ENST00000370665.4	c.450A>G; c.-175A>G	p.P150P	synonymous	Likely Benign				< 10	57249159	0.162
1	84878177	84878177	p31.1	G	T	SNV	Exonic	DNASE2B	ENST00000370662.3; NM_021233.3; NM_058248.2; ENST00000370665.4	c.69G>T; c.693G>T	p.S23S; p.S231S	synonymous	Likely Benign				< 10	34317968	0.155
1	84991747	84991747	p22.3	C	G	SNV	Exonic	SPATA1	NM_001310156.2	c.535C>G	p.Q179E	missense	Uncertain Significance				12.22
1	85279766	85279766	p22.3	T	C	SNV	Exonic	LPAR3	NM_012152.3; ENST00000370611.4; ENST00000440886.1	c.825A>G	p.K275K	synonymous	Likely Benign				< 10	61737670	0.174	RCV000972364.1
1	85279805	85279805	p22.3	G	A	SNV	Exonic	LPAR3	NM_012152.3; ENST00000370611.4; ENST00000440886.1	c.786C>T	p.D262D	synonymous	Uncertain Significance				< 10	769501680	0.006						912610	0.16
1	85484854	85484854	p22.3	T	C	SNV	Exonic	MCOLN3	NM_018298.11; ENST00000370589.7; ENST00000341115.8; NM_001253693.2	c.1614A>G; c.1446A>G	p.R482R; p.R538R	synonymous	Uncertain Significance				13.54	114141247	0.091
1	85506757	85506757	p22.3	T	C	SNV	Exonic; Intronic	MCOLN3	ENST00000370589.7; NM_018298.11; ENST00000341115.8; ENST00000370587.5; NM_001253693.2	c.332A>G; c.228+4059A>G	p.D111G	missense	Uncertain Significance	Tolerated	0.1	Benign	22.6	150176447	0.004
1	85563344	85563344	p22.3	C	A	SNV	Intronic	DNAI3	NM_145172.5; ENST00000294664.11; NM_001288563.2; ENST00000326813.12	c.1350+6C>A; c.1233+6C>A			Likely Benign				< 10	192462237	0.703	RCV000969772.2
1	85575763	85575763	p22.3	C	T	SNV	Exonic	DNAI3	NM_145172.5; ENST00000294664.11; NM_001288563.2; ENST00000326813.12	c.1731C>T; c.1614C>T	p.D577D; p.D538D	synonymous	Likely Benign				< 10	74095803	0.169	RCV000974846.2
1	85583460	85583460	p22.3	C	T	SNV	Exonic	DNAI3	NM_145172.5; NM_001288563.2; ENST00000294664.11; ENST00000326813.12	c.1835C>T; c.1718C>T	p.P573L; p.P612L	missense	Uncertain Significance	Tolerated	0.13	Benign	12.31	142129983	0.012
1	85598596	85598596	p22.3	G	A	SNV	Promoter; Exonic	MIR4423; DNAI3	NR_039619.1; ENST00000580922.1; NM_145172.5; ENST00000294664.11; NM_001288563.2; ENST00000326813.12	c.2474G>A; c.2591G>A; n.-881G>A	p.S825N; p.S864N	missense	Likely Benign	Tolerated	0.24	Benign	< 10	186213541	0.119
1	85930530	85930530	p22.3	C	G	SNV	Intronic; Exonic	DDAH1	ENST00000426972.8; NM_012137.4; NM_001134445.2; ENST00000284031.13	c.199G>C; c.-7+31319G>C	p.A67P	missense	Uncertain Significance	Tolerated	0.48	Benign	22.3	115687004	0.249
1	86144398	86144398	p22.3	A	G	SNV	Exonic	ZNHIT6	ENST00000431532.6; NM_001170670.2; NM_017953.4; ENST00000370574.4	c.1038T>C; c.1155T>C	p.P346P; p.P385P	synonymous	Uncertain Significance				11.17	139562514	0.038
1	86171988	86171988	p22.3	C	T	SNV	Exonic	ZNHIT6	ENST00000431532.6; NM_001170670.2; NM_017953.4; ENST00000370574.4	c.773G>A; c.656G>A	p.R219Q; p.R258Q	missense	Uncertain Significance	Tolerated	0.08	Probably Damaging	29.6	141053310	0.015
1	86173605	86173605	p22.3	C	T	SNV	Exonic	ZNHIT6	ENST00000431532.6; NM_001170670.2; NM_017953.4; ENST00000370574.4	c.246G>A; c.363G>A	p.T121T; p.T82T	synonymous	Uncertain Significance				10.94	147160762	0.005
1	86241379	86241379	p22.3	T	C	SNV	Exonic; ncRNA; Intronic	COL24A1	NR_146345.1; NR_146344.1; NM_152890.7; NR_146340.2; NR_146341.2; NR_146343.1; ENST00000370571.7; NM_001349955.1; NR_146342.2	n.4461+5524A>G; n.4523+5524A>G; n.4576A>G; c.4352A>G; n.4742A>G; n.4849A>G; c.2252A>G; n.4399A>G	p.E751G; p.E1451G	missense	Uncertain Significance	Damaging	0.02	Possibly Damaging	28	200383865	0.025
1	86515808	86515808	p22.3	C	T	SNV	Exonic; ncRNA; 5'UTR	COL24A1	NR_146345.1; NR_146344.1; NM_152890.7; NR_146340.2; NR_146341.2; NR_146343.1; ENST00000370571.7; NR_146342.2; NM_001349955.1	n.2280G>A; n.2276G>A; n.1979G>A; c.1904G>A; c.-197G>A; n.2071G>A	p.R635Q	missense	Uncertain Significance	Damaging	0.04	Probably Damaging	32	75596213	0.226
1	86822245	86822245	p22.3	C	T	SNV	Exonic; Intronic	ODF2L	ENST00000294678.6; NM_001366782.1; NM_001366781.1; ENST00000359242.7; NM_001366779.1; NM_020729.3; NM_001007022.3; NM_001184765.2; NM_001366784.1; ENST00000370566.7; NM_001366783.1; NM_001184766.2	c.920G>A; c.1400G>A; c.1313G>A; c.1360-1703G>A; c.1273-1703G>A	p.R467H; p.R307H; p.R438H	missense	Likely Benign	Tolerated	0.74	Benign	< 10	142772711	0.137	RCV000903393.1
1	86889966	86889966	p22.3	C	T	SNV	Exonic	CLCA2	NM_006536.7; ENST00000370565.5	c.36C>T	p.N12N	synonymous	Likely Benign				< 10	34559750	0.221
1	86942225	86942225	p22.3	A	C	SNV	Exonic	CLCA1	NM_001285.4; ENST00000394711.2; ENST00000234701.7	c.546A>C	p.I182I	synonymous	Likely Benign				< 10	142663356	0.133
1	86960099	86960099	p22.3	C	T	SNV	Exonic	CLCA1	NM_001285.4; ENST00000394711.2; ENST00000234701.7	c.1910C>T	p.T637I	missense	Likely Benign			Benign	22.8	75571810	0.136	RCV000907811.1
1	87045065	87045065	p22.3	T	A	SNV	Intronic; ncRNA; Exonic	CLCA4-AS1; CLCA4	NR_135837.1; ENST00000370563.3; NM_012128.4; NR_024602.2	n.1293-7974A>T; c.2151T>A; n.2084T>A	p.P717P	synonymous	Uncertain Significance				< 10	185369520	0.052
1	87194154	87194154	p22.3	G	A	SNV	Exonic; Intronic	SH3GLB1	NM_001206651.2; NM_001206652.2; ENST00000616170.4; ENST00000370558.8; ENST00000482504.1; NM_016009.5; NM_001206653.2; ENST00000535010.5	c.570+4066G>A; c.609+30G>A; c.639G>A; c.270+4066G>A	p.L213L	synonymous	Uncertain Significance				21.6	114816116	0.375
1	87599340	87599340	p22.3	T	C	SNV	Exonic; ncRNA	AC093155.3; LINC01140	NR_026988.1; NR_026985.1; NR_026989.1; ENST00000370548.3; NR_026986.1; NR_026987.1	n.274T>C; n.578T>C; n.371T>C; n.378T>C; c.810T>C	p.C270C	synonymous	Likely Benign				< 10	140514023	0.118
1	89473514	89473514	p22.2	C	G	SNV	Exonic; ncRNA	GBP3	ENST00000370481.9; NR_135007.2; NM_001319180.2; NM_018284.3; NM_001319179.2	n.1392G>C; c.1444G>C; c.1681G>C; c.1279G>C	p.E561Q; p.E427Q; p.E482Q	missense	Uncertain Significance	Tolerated	0.17	Possibly Damaging	17.42	113228909	0.137
1	89475080	89475080	p22.2	A	G	SNV	Exonic; ncRNA	GBP3	ENST00000370481.9; NR_135007.2; NM_001319180.2; NM_018284.3; NM_001319179.2; NM_001319181.2	c.1058T>C; c.1460T>C; n.1171T>C; c.1223T>C; c.1379T>C	p.I487T; p.I353T; p.I408T; p.I460T	missense	Uncertain Significance	Tolerated	0.07	Benign	19.76	141209926	0.091
1	89475178	89475178	p22.2	C	G	SNV	Splice Site	GBP3	ENST00000370481.9; NR_135007.2; NM_001319180.2; NM_018284.3; NM_001319179.2; NM_001319181.2	n.1074-1G>C; c.961-1G>C; c.1282-1G>C; c.1126-1G>C; c.1363-1G>C			Uncertain Significance				32	140187029	0.098
1	89476589	89476589	p22.2	G	A	SNV	Exonic; Intronic	GBP3	ENST00000370481.9; NR_135007.2; NM_001319180.2; NM_018284.3; NM_001319179.2; NM_001319181.2	n.1074-1412C>T; c.1123C>T; c.1279C>T; c.958C>T; c.1360C>T	p.Q320*; p.Q375*; p.Q427*; p.Q454*	stop gain	Uncertain Significance				37	12087251	0.143
1	89477463	89477463	p22.2	C	G	SNV	Exonic; Intronic	GBP3	ENST00000370481.9; NR_135007.2; NM_001319180.2; NM_018284.3; NM_001319179.2; NM_001319181.2	c.879G>C; c.1116G>C; c.1068+48G>C; n.1073+1405G>C; c.714G>C	p.K372N; p.K238N; p.K293N	missense	Uncertain Significance	Tolerated	0.09	Benign	16.96	116811367	0.115
1	89477642	89477642	p22.2	C	T	SNV	Exonic; Intronic	GBP3	ENST00000370481.9; NR_135007.2; NM_001319180.2; NM_018284.3; NM_001319179.2; NM_001319181.2	c.535G>A; n.1073+1226G>A; c.700G>A; c.937G>A	p.A234T; p.A313T; p.A179T	missense	Uncertain Significance	Tolerated	0.06	Benign	20.2	113485304	0.007
1	89598003	89598003	p22.2	A	G	SNV	Exonic	GBP7	ENST00000294671.3; NM_207398.3	c.1746T>C	p.I582I	synonymous	Likely Benign				< 10	141236032	0.169
1	89598040	89598040	p22.2	G	A	SNV	Exonic	GBP7	ENST00000294671.3; NM_207398.3	c.1709C>T	p.S570L	missense	Uncertain Significance	Tolerated	0.32	Benign	< 10	144677260	0.008
1	89615068	89615068	p22.2	C	A	SNV	Exonic	GBP7	ENST00000294671.3; NM_207398.3	c.1059G>T	p.L353L	synonymous	Uncertain Significance				< 10	1400238754
1	89616151	89616152	p22.2		T	Insertion	Exonic	GBP7	ENST00000294671.3; NM_207398.3	c.732dupA	p.L245fs*6	frameshift	Uncertain Significance				16.79	200922375	0.222						2258883	18.18
1	89630543	89630543	p22.2	T	C	SNV	Splice Site	GBP7	ENST00000294671.3; NM_207398.3	c.191-2A>G			Uncertain Significance				32	148010640	0.167
1	89844123	89844123	p22.2	C	A	SNV	Exonic	GBP6	NM_198460.3; NM_001320257.2; ENST00000370456.5	c.576C>A; c.186C>A	p.H192Q; p.H62Q	missense	Uncertain Significance	Tolerated	0.76	Benign	< 10	952788294							426801	0.08
1	89845985	89845985	p22.2	G	A	SNV	Exonic	GBP6	NM_198460.3; NM_001320257.2; ENST00000370456.5	c.666G>A; c.276G>A	p.E222E; p.E92E	synonymous	Likely Benign				< 10	113658121	0.277	RCV000883585.1
1	89848352	89848352	p22.2	G	T	SNV	Exonic	GBP6	NM_198460.3; NM_001320257.2; ENST00000370456.5	c.1282G>T; c.892G>T	p.V428F; p.V298F	missense	Likely Benign	Tolerated	0.26	Benign	19.71	113532469	0.173	RCV000897937.1
1	90048782	90048782	p22.2	G	A	SNV	Exonic	LRRC8B	NM_015350.4; NM_001369819.2; NM_001134476.2; ENST00000439853.6; NM_001369817.2	c.573G>A	p.S191S	synonymous	Likely Benign				< 10	114525158	0.077	RCV000894294.1
1	90048812	90048812	p22.2	C	T	SNV	Exonic	LRRC8B	NM_015350.4; NM_001369819.2; NM_001134476.2; ENST00000439853.6; NM_001369817.2	c.603C>T	p.S201S	synonymous	Uncertain Significance				< 10	116502828	0.115
1	90398846	90398846	p22.2	C	T	SNV	Exonic	LRRC8D	NM_018103.5; NM_001134479.2; ENST00000337338.9; ENST00000394593.7	c.219C>T	p.A73A	synonymous	Uncertain Significance				10.24	17130932	0.162
1	90470615	90470615	p22.2	A	G	SNV	5'UTR; Intronic	ZNF326	NM_181781.4; NM_182975.4; NM_001320185.2; ENST00000370447.3; ENST00000340281.9; ENST00000361911.9; NM_182976.4	c.97+18A>G; c.-40A>G			Uncertain Significance				20.4	191505447	0.027
1	91382406	91382406	p22.2	G	A	SNV	Exonic	ZNF644	NM_016620.4; ENST00000337393.10; NM_201269.3; NM_032186.5; ENST00000347275.9; ENST00000361321.5	c.267C>T; c.3933C>T	p.A89A; p.A1311A	synonymous	Uncertain Significance				10.06	114618312	0.027	RCV000915627.1
1	91843683	91843683	p22.2	T	C	SNV	ncRNA; Exonic	HFM1	ENST00000370425.8; NM_001017975.6; NR_165455.1	c.1294A>G; n.1476A>G	p.M432V	missense	Likely Benign			Probably Damaging	25	115101410	0.104	RCV000891367.1
1	91973451	91973451	p22.2	A	G	SNV	Exonic	CDC7	ENST00000234626.11; ENST00000428239.5; NM_001134420.2; NM_003503.4; NM_001134419.2	c.156A>G	p.P52P	synonymous	Uncertain Significance				12.94	368395777	0.003
1	91977394	91977394	p22.2	C	G	SNV	Exonic	CDC7	ENST00000234626.11; ENST00000428239.5; NM_001134420.2; NM_003503.4; NM_001134419.2	c.486C>G	p.F162L	missense	Uncertain Significance	Tolerated	1	Benign	16.05	13447503	0.226						9119870	0.83
1	91980463	91980463	p22.2	G	T	SNV	Exonic	CDC7	ENST00000234626.11; ENST00000428239.5; NM_001134420.2; NM_003503.4; NM_001134419.2	c.1006G>T	p.A336S	missense	Uncertain Significance	Tolerated	0.85	Benign	12.1
1	92178119	92178119	p22.1	T	C	SNV	Intronic	TGFBR3	NM_003243.5; ENST00000525962.5; ENST00000212355.9; NM_001195684.1; ENST00000465892.6; NM_001195683.2; ENST00000370399.6; NR_036634.2	c.1864-20A>G; c.1867-20A>G; n.2351-20A>G			Likely Benign				< 10	115049669	0.116
1	92181787	92181787	p22.1	T	A	SNV	Intronic	TGFBR3	NM_003243.5; ENST00000525962.5; ENST00000212355.9; NM_001195684.1; ENST00000465892.6; NM_001195683.2; NR_036634.2; ENST00000370399.6	c.1863+6A>T; n.2350+6A>T; c.1866+6A>T			Uncertain Significance				< 10	116282609	0.062
1	92467669	92467669	p22.1	C	T	SNV	Exonic	BRDT	ENST00000362005.7; NM_001242805.2; ENST00000370389.6; NM_001242808.2; NM_001242810.2; ENST00000399546.7; NM_001726.4; NM_001242807.2; ENST00000402388.1; ENST00000394530.7; NM_207189.4; NM_001242806.2	c.2132C>T; c.2351C>T; c.2363C>T; c.2213C>T	p.T784M; p.T738M; p.T711M; p.T788M	missense	Uncertain Significance	Tolerated	0.12	Benign	< 10	116454064	0.023
1	92479830	92479831	p22.1	AA		Deletion	Exonic	BRDT	ENST00000362005.7; NM_001242805.2; ENST00000370389.6; NM_001242808.2; NM_001242810.2; ENST00000399546.7; NM_001726.4; NM_001242807.2; ENST00000402388.1; ENST00000394530.7; NM_207189.4; NM_001242806.2	c.*1_*2delAA			Uncertain Significance				32	775152598	0.003
1	92643401	92643401	p22.1	A	G	SNV	Exonic	BTBD8	NM_001376131.1; NM_015237.4; ENST00000637221.2	c.848A>G; c.2387A>G	p.N283S; p.N796S	missense	Uncertain Significance				14.48	145766841	0.102
1	92643428	92643428	p22.1	A	G	SNV	Exonic	BTBD8	NM_001376131.1; NM_015237.4; ENST00000637221.2	c.2414A>G; c.875A>G	p.H805R; p.H292R	missense	Uncertain Significance				20.5	2128647	0.092
1	92646811	92646811	p22.1	G	A	SNV	Exonic	BTBD8	NM_001376131.1; NM_015237.4; ENST00000637221.2	c.3571G>A; c.2032G>A	p.A678T; p.A1191T	missense	Uncertain Significance				< 10	745453626	0.006
1	92647960	92647960	p22.1	G	A	SNV	Exonic	BTBD8	NM_001376131.1; NM_015237.4; ENST00000637221.2	c.3181G>A; c.4720G>A	p.D1574N; p.D1061N	missense	Uncertain Significance				22.8	148471280	0.093
1	92649529	92649529	p22.1	A	G	SNV	Exonic	BTBD8	NM_001376131.1; NM_015237.4; ENST00000637221.2	c.5021A>G; c.3482A>G	p.Q1161R; p.Q1674R	missense	Uncertain Significance				24.7	754400287	0.001
1	92941657	92941657	p22.1	G	A	SNV	Exonic	GFI1	ENST00000370332.5; NM_001127215.3; ENST00000294702.6; ENST00000427103.5; NM_001127216.3; NM_005263.5	c.1198C>T	p.L400F	missense	Likely Benign	Damaging	0.01	Possibly Damaging	22.7	143708376	0.142	RCV001573502.1; RCV000554979.5	2889523
1	93301743	93301743	p22.1	A	G	SNV	Promoter; Intronic	RPL5; DIPK1A; SNORD21	NM_001252273.2; ENST00000383953.1; NR_146333.1; NM_000969.5; ENST00000370321.8; ENST00000615519.4; NR_000006.8; ENST00000645119.1	c.475-3152T>C; n.-1103A>G; c.325-4A>G; n.421-41A>G; c.324+1273A>G			Uncertain Significance				13.11	183825489	0.088	RCV000225806.6
1	93301840	93301840	p22.1	G	A	SNV	Promoter; Exonic; Intronic; ncRNA	RPL5; DIPK1A; SNORD21	NM_001252273.2; ENST00000383953.1; NR_146333.1; NM_000969.5; ENST00000370321.8; ENST00000615519.4; NR_000006.8; ENST00000645119.1	c.324+1370G>A; n.477G>A; c.475-3249C>T; c.418G>A; n.-1006G>A	p.G140S	missense	Uncertain Significance	Tolerated	0.2	Benign	19.55	121434406	0.011	RCV000006557.3; RCV001306122.1; RCV000499952.1		603634	612561
1	93676439	93676439	p22.1	C	T	SNV	Exonic	CCDC18	NM_001378204.1; NM_206886.4; ENST00000401026.7; NM_001306076.1	c.1290C>T	p.C430C	synonymous	Likely Benign				< 10	189830464	0.073	RCV000888618.1
1	94032969	94032969	p22.1	C	G	SNV	Exonic	BCAR3	ENST00000539242.5; ENST00000370243.1; NM_001261408.2; ENST00000370244.5; ENST00000260502.11; ENST00000370247.7; NM_001261410.2; NM_001308251.1; NM_003567.4; NM_001261409.1	c.1194G>C; c.2166G>C; c.1893G>C	p.V398V; p.V631V; p.V722V	synonymous	Uncertain Significance				11.66	34294233	0.151
1	94054765	94054765	p22.1	C	T	SNV	Exonic	BCAR3	NM_001261408.2; ENST00000370243.1; ENST00000370244.5; ENST00000260502.11; ENST00000370247.7; NM_001261410.2; NM_003567.4; NM_001261409.1	c.698G>A; c.425G>A	p.C233Y; p.C142Y	missense	Uncertain Significance	Tolerated	0.66	Benign	20.2	35588942	0.065
1	94054843	94054843	p22.1	C	T	SNV	Exonic	BCAR3	NM_001261408.2; ENST00000370243.1; ENST00000370244.5; ENST00000260502.11; ENST00000370247.7; NM_001261410.2; NM_003567.4; NM_001261409.1	c.620G>A; c.347G>A	p.R116Q; p.R207Q	missense	Uncertain Significance	Tolerated	0.43	Benign	22.4	142078116	0.007
1	94140397	94140397	p22.1	G	A	SNV	Exonic	BCAR3	ENST00000370243.1; NM_001261408.2; ENST00000370244.5; ENST00000260502.11; NM_003567.4; NM_001261409.1	c.90C>T	p.S30S	synonymous	Uncertain Significance				11.24	147949041	0.019
1	94338728	94338728	p22.1	G	A	SNV	Exonic	DNTTIP2	NM_014597.5; ENST00000436063.7	c.1849C>T	p.H617Y	missense	Uncertain Significance	Tolerated	0.15	Benign	10.71	757896186	0.005
1	94458783	94458783	p22.1	G	T	SNV	3'UTR	ABCA4	NM_000350.3; ENST00000536513.5; ENST00000370225.4	c.*10C>A			Likely Benign				< 10	145634012	0.226	RCV001097879.1
1	94476459	94476459	p22.1	G	A	SNV	Exonic	ABCA4	NM_000350.3; ENST00000536513.5; ENST00000370225.4	c.1987C>T; c.5611C>T	p.H663Y; p.H1871Y	missense	Uncertain Significance	Tolerated	0.06	Benign	22.6
1	94476824	94476824	p22.1	G	A	SNV	Exonic	ABCA4	NM_000350.3; ENST00000536513.5; ENST00000370225.4	c.5578C>T; c.1954C>T	p.R652W; p.R1860W	missense	Uncertain Significance	Damaging	0.04	Benign	25.3	200849015	0.001
1	94486788	94486788	p22.1	T	C	SNV	Intronic	ABCA4	NM_000350.3; ENST00000536513.5; ENST00000370225.4	c.1394+8A>G; c.5018+8A>G			Likely Benign				< 10	188800817	0.101	RCV000906663.3; RCV000123431.2
1	94508474	94508474	p22.1	G	A	SNV	Intronic	ABCA4	NM_000350.3; ENST00000536513.5; ENST00000370225.4	c.3191-20C>T; c.-64-2829C>T			Uncertain Significance				< 10	61754036	0.044	RCV000426370.2; RCV000085555.1
1	94520708	94520708	p22.1	A	G	SNV	Intronic; Exonic	ABCA4	ENST00000649773.1; NM_000350.3; ENST00000536513.5; ENST00000370225.4	c.2324T>C; c.2546T>C; c.-65+8022T>C	p.V775A; p.V849A	missense	Likely Benign	Damaging	0	Benign	22.4	61749435	0.136	RCV001286435.1; RCV001074506.1; RCV000986366.1; RCV000085485.5
1	94576974	94576974	p22.1	G	A	SNV	Intronic	ABCA4	ENST00000649773.1; NM_000350.3; ENST00000370225.4	c.302+20C>T			Likely Benign				< 10	61753050	0.154	RCV000085537.2
1	94643196	94643196	p22.1	C	T	SNV	Exonic	ARHGAP29	NM_001328664.2; NM_001328667.2; ENST00000260526.11; NM_001328666.2; NM_004815.4; NM_001328665.2	c.2850G>A; c.2877G>A; c.2685G>A	p.A959A; p.A895A; p.A950A	synonymous	Likely Benign				< 10	79740616	0.149	RCV000891368.2
1	94953299	94953299	p21.3	T	C	SNV	Exonic	ABCD3	ENST00000370214.9; NM_002858.4	c.1017T>C	p.D339D	synonymous	Likely Benign				< 10
1	94956773	94956773	p21.3	A	G	SNV	Exonic	ABCD3	ENST00000370214.9; NM_002858.4	c.1356A>G	p.G452G	synonymous	Uncertain Significance				12.52	147293586	0.086	RCV000676009.2
1	95001655	95001655	p21.3	T	C	SNV	Exonic	F3	NM_001178096.2; NM_001993.5; ENST00000334047.12; ENST00000370207.4	c.278A>G	p.D93G	missense	Likely Benign	Tolerated	0.17	Probably Damaging	22.1	143237190	0.184	RCV000887781.1
1	95005907	95005907	p21.3	C	T	SNV	Exonic	F3	NM_001178096.2; NM_001993.5; ENST00000334047.12; ENST00000370207.4	c.118G>A	p.A40T	missense	Uncertain Significance	Tolerated	0.57	Benign	< 10	148395733	0.042	RCV000902309.1
1	95005919	95005919	p21.3	T	C	SNV	Exonic	F3	NM_001178096.2; NM_001993.5; ENST00000334047.12; ENST00000370207.4	c.106A>G	p.T36A	missense	Likely Benign	Tolerated	0.84	Benign	< 10	3917604	0.232	RCV000889879.1
1	95286531	95286531	p21.3	A	G	SNV	Exonic; Intronic; ncRNA; Promoter	SLC44A3-AS1; SLC44A3	NR_160783.1; ENST00000446120.6; NM_001301079.2; ENST00000529450.5; NM_001114106.3; ENST00000467909.5; NM_001258342.2; NR_146575.2; ENST00000271227.11; NR_160784.1; NR_160780.1; NM_001258341.2; NM_152369.5; NM_001258340.2; ENST00000532427.5; NR_160781.1; NR_160779.1; NR_160782.1; ENST00000527077.5; NM_001258343.2; NR_104131.2	n.149A>G; c.-10+252A>G; c.54A>G; n.-743T>C; c.27+497A>G	p.Q18Q	synonymous	Likely Benign				< 10	115924939	0.23
1	95294047	95294047	p21.3	A	C	SNV	Splice Site	SLC44A3	NM_001258343.2; ENST00000446120.6; NM_001301079.2; NM_001114106.3; NM_001258342.2; ENST00000467909.5; NR_146575.2; ENST00000529450.5; ENST00000271227.11; NM_001258341.2; NM_152369.5; NM_001350223.1; ENST00000532427.5; NM_001258340.2; ENST00000527077.5	n.511-2A>C; c.176-2A>C; c.272-2A>C; c.212-2A>C; c.308-2A>C; c.416-2A>C; c.320-2A>C; c.125-2A>C			Uncertain Significance				33	137975014	0.018
1	95357849	95357849	p21.3	T	C	SNV	Exonic; Intronic	SLC44A3	NM_001258343.2; ENST00000446120.6; NM_001301079.2; NM_001114106.3; ENST00000467909.5; NM_001258342.2; NR_146575.2; ENST00000529450.5; ENST00000271227.11; NM_001258341.2; NM_152369.5; NM_001350223.1; ENST00000532427.5; NM_001258340.2; ENST00000527077.5	c.1489T>C; c.1429T>C; c.1633T>C; c.1393T>C; c.1342T>C; c.1630T>C; n.1750+1026T>C; c.1525T>C; c.1534T>C	p.C545R; p.C512R; p.C477R; p.C544R; p.C497R; p.C465R; p.C509R; p.C448R	missense	Uncertain Significance	Damaging	0.01	Possibly Damaging	26.3	115958260	0.194
1	95699841	95699841	p21.3	C	T	SNV	Promoter; Exonic; ncRNA; 5'UTR; Intronic	LOC101928118; RWDD3; TLCD4-RWDD3	NR_125949.1; NR_103483.2; NR_125948.1; NM_001278248.2; NM_015485.5; NM_001199682.2; NR_103484.1; NM_001278247.2; ENST00000604534.5; NM_001128142.2; NM_001199691.1; ENST00000263893.10	c.-124C>T; c.55C>T; n.76C>T; n.-303G>A; n.131C>T; c.566+3291C>T	p.P19S	missense	Uncertain Significance			Benign	22.7	371830129	0.019
1	97770937	97770937	p21.3	A	G	SNV	Intronic	DPYD-AS1; DPYD	NM_000110.4; NR_046590.1; ENST00000370192.8	n.129-808A>G; c.2180-3T>C			Likely Benign				< 10	74104343	0.051	RCV001288946.1; RCV000911465.1
1	97771786	97771786	p21.3	T	C	SNV	ncRNA; Exonic	DPYD-AS1; DPYD	NM_000110.4; NR_046590.1; ENST00000370192.8	c.2126A>G; n.170T>C	p.K709R	missense	Uncertain Significance	Damaging	0	Probably Damaging	27.5	1175899710							1250676	0.39
1	97981407	97981407	p21.3	C	T	SNV	Exonic	DPYD	NM_000110.4; ENST00000370192.8	c.1615G>A	p.G539R	missense	Uncertain Significance	Damaging	0.03	Probably Damaging	23.3	142619737	0.02	RCV000086476.1; RCV001100346.1; RCV001293626.1
1	99387510	99387510	p21.3	T	C	SNV	Exonic	PLPPR5	NM_001010861.3; ENST00000370188.7; NM_001037317.2; ENST00000672681.1; ENST00000263177.5	c.726A>G	p.V242V	synonymous	Uncertain Significance				10.89	114884676	0.038
1	100152736	100152736	p21.2	A	C	SNV	Exonic	PALMD	NM_017734.5; ENST00000605497.5; ENST00000263174.9	c.505A>C	p.N169H	missense	Uncertain Significance	Tolerated	0.12	Probably Damaging	23.5	144971312	0.146
1	100154502	100154502	p21.2	A	G	SNV	Exonic	PALMD	NM_017734.5; ENST00000605497.5; ENST00000263174.9	c.686A>G	p.N229S	missense	Uncertain Significance	Damaging	0.01	Probably Damaging	24.6	35258980	0.101
1	100154632	100154632	p21.2	A	T	SNV	Exonic	PALMD	NM_017734.5; ENST00000605497.5; ENST00000263174.9	c.816A>T	p.P272P	synonymous	Likely Benign				< 10	11802904	0.192	RCV000883803.1
1	100154765	100154765	p21.2	T	C	SNV	Exonic	PALMD	NM_017734.5; ENST00000605497.5; ENST00000263174.9	c.949T>C	p.F317L	missense	Likely Benign	Tolerated	0.72	Benign	< 10	61741704	0.1
1	100177643	100177643	p21.2	G	A	SNV	Intronic	FRRS1	NM_001361041.2; ENST00000646001.2; ENST00000287474.9; NM_001013660.4	c.1480+18C>T			Uncertain Significance				11.72	148755843	0.036
1	100177655	100177655	p21.2	T	C	SNV	Intronic	FRRS1	NM_001361041.2; ENST00000646001.2; ENST00000287474.9; NM_001013660.4	c.1480+6A>G			Likely Benign				< 10	116770015	0.184
1	100177699	100177699	p21.2	G	A	SNV	Exonic	FRRS1	NM_001361041.2; ENST00000287474.9; ENST00000646001.2; NM_001013660.4	c.1442C>T	p.T481I	missense	Uncertain Significance			Benign	19.86	61740680	0.197
1	100212941	100212941	p21.2	C	T	SNV	Exonic	FRRS1	NM_001361041.2; ENST00000287474.9; ENST00000646001.2; NM_001013660.4	c.242G>A	p.R81H	missense	Uncertain Significance			Probably Damaging	23	141729391	0.002
1	100356846	100356846	p21.2	A	G	SNV	Exonic	AGL	NM_000028.2; ENST00000294724.8; ENST00000361915.8; NM_000644.2; ENST00000370165.7; NM_000643.2; NM_000642.3; NM_000646.2; ENST00000370163.7	c.2835A>G; c.2883A>G	p.R961R; p.R945R	synonymous	Likely Benign				11.64	113625417	0.125	RCV001079501.2; RCV000675333.3; RCV000253446.2
1	100358107	100358107	p21.2	A	G	SNV	Exonic	AGL	NM_000028.2; ENST00000294724.8; ENST00000361915.8; NM_000644.2; ENST00000370165.7; NM_000643.2; NM_000642.3; NM_000646.2; ENST00000370163.7	c.3203A>G; c.3155A>G	p.Y1052C; p.Y1068C	missense	Uncertain Significance	Tolerated	0.17	Benign	13.55	147165298	0.059	RCV000533130.5; RCV000272436.1; RCV001540741.1	186751
1	100366213	100366213	p21.2	G	A	SNV	Exonic	AGL	NM_000028.2; ENST00000294724.8; ENST00000361915.8; NM_000644.2; ENST00000370165.7; NM_000643.2; NM_000642.3; NM_000646.2; ENST00000370163.7	c.3336G>A; c.3384G>A	p.A1112A; p.A1128A	synonymous	Likely Benign				11.11	149393587	0.127	RCV001079502.2; RCV000252381.2; RCV000675339.3
1	100376359	100376359	p21.2	A	T	SNV	Exonic	AGL	NM_000028.2; ENST00000294724.8; ENST00000361915.8; NM_000644.2; ENST00000370165.7; NM_000643.2; NM_000642.3; NM_000646.2; ENST00000370163.7	c.3744A>T; c.3792A>T	p.G1264G; p.G1248G	synonymous	Uncertain Significance				10.66	148606237	0.044	RCV000530507.5; RCV000443781.2
1	100575930	100575930	p21.2	G	A	SNV	Exonic	SASS6	ENST00000287482.6; NM_001304829.2; NM_194292.3	c.779C>T; c.278C>T	p.A93V; p.A260V	missense	Uncertain Significance	Tolerated	0.45	Benign	18.03	75864953	0.03	RCV000893542.2
1	100624830	100624830	p21.2	T	A	SNV	Exonic	LRRC39	NM_001256385.2; NM_144620.4; ENST00000370137.6; NM_001256387.2; NM_001256386.2	c.361A>T	p.I121L	missense	Uncertain Significance	Tolerated	0.09	Possibly Damaging	22.5	34920283	0.117
1	100964826	100964826	p21.2	C	T	SNV	Exonic; Intronic	CDC14A	NM_001319211.2; ENST00000644676.1; ENST00000647005.1; ENST00000361544.11; NM_001319212.2; ENST00000336454.5; ENST00000635056.2; NM_003672.4; NM_033312.3; ENST00000644813.1; NM_001319210.2	c.884C>T; c.1763C>T; c.1766C>T; c.1589C>T; c.1581+8C>T; c.1755+8C>T	p.A588V; p.A530V; p.A589V; p.A295V	missense	Likely Benign	Tolerated	1	Benign	< 10	139956023	0.14	RCV000602512.3; RCV001537820.1
1	101194884	101194884	p21.2	A	G	SNV	Exonic; Intronic	VCAM1	ENST00000370119.8; NM_001078.4; ENST00000294728.7; NM_080682.3; ENST00000347652.6; NM_001199834.2	c.1150A>G; c.929-1870A>G; c.964A>G	p.T322A; p.T384A	missense	Uncertain Significance	Tolerated	0.25	Benign	13.62	3783612	0.214
1	101458271	101458271	p21.2	G	A	SNV	Exonic; Intronic	DPH5	NM_015958.3; NM_001077395.2; ENST00000342173.11; ENST00000370109.8; ENST00000427040.2; NM_001077394.2	c.556C>T; c.-83-2084C>T	p.R186W	missense	Uncertain Significance	Damaging	0	Probably Damaging	25.5	116634893	0.145
1	103471459	103471460	p21.1		CAT	Insertion	Intronic	COL11A1	NM_080629.3; NM_001854.4; ENST00000644186.1; ENST00000647280.1; NM_001190709.2; ENST00000370096.9; ENST00000512756.5; ENST00000645458.1; NR_134980.2; NM_080630.4	c.1792-12_1792-10dupATG; c.1675-12_1675-10dupATG; c.1444-12_1444-10dupATG; c.1828-12_1828-10dupATG; n.2136-12_2136-10dupATG			Uncertain Significance				10.33			RCV000153075.6; RCV000483453.3; RCV000384516.1; RCV000327589.1; RCV000287893.1
1	103471460	103471462	p21.1	CAT		Deletion	Intronic	COL11A1	NM_080629.3; NM_001854.4; ENST00000644186.1; ENST00000647280.1; NM_001190709.2; ENST00000370096.9; ENST00000512756.5; ENST00000645458.1; NR_134980.2; NM_080630.4	n.2136-12_2136-10delATG; c.1675-12_1675-10delATG; c.1444-12_1444-10delATG; c.1828-12_1828-10delATG; c.1792-12_1792-10delATG			Uncertain Significance				12.73			RCV001582565.1; RCV001582566.1; RCV001582567.1; RCV001582568.1; RCV000079905.6; RCV001510954.1
1	103491777	103491777	p21.1	T	C	SNV	Exonic; Intronic; ncRNA	COL11A1	NM_080629.3; NM_001854.4; ENST00000647280.1; ENST00000644186.1; NM_001190709.2; ENST00000370096.9; ENST00000512756.5; ENST00000645458.1; NR_134980.2; NM_080630.4	c.781-608A>G; c.892A>G; c.781-269A>G; n.1236A>G	p.T298A	missense	Uncertain Significance	Tolerated	0.67	Possibly Damaging	23.6	144966407	0.014	RCV001474179.2
1	103573683	103573683	p21.1	T	A	SNV	Exonic; ncRNA	COL11A1	NM_080629.3; NM_001854.4; ENST00000647280.1; ENST00000644186.1; NM_001190709.2; ENST00000370096.9; ENST00000512756.5; ENST00000645458.1; NR_134980.2; NM_080630.4	n.396A>T; c.52A>T	p.T18S	missense	Uncertain Significance	Tolerated	0.84	Benign	13.21	114630202	0.054	RCV000830594.2; RCV000732953.2
1	107600125	107600125	p13.3	T	C	SNV	Exonic	PRMT6	NM_018137.3; ENST00000370078.2	c.788T>C	p.L263S	missense	Uncertain Significance	Tolerated	0.16	Benign	23.1	200913655	0.004
1	108728562	108728562	p13.3	A	T	SNV	Exonic	SLC25A24	NM_213651.3; ENST00000565488.6; NM_013386.5; ENST00000370041.4	c.141T>A; c.198T>A	p.T47T; p.T66T	synonymous	Likely Benign				11.83	114771768	0.216	RCV000968976.2
1	109158999	109158999	p13.3	T	C	SNV	Intronic	FAM102B	NM_001010883.3; ENST00000370035.8	c.406-5T>C			Uncertain Significance				10.52	146090173	0.125
1	109191298	109191298	p13.3	T	C	SNV	Exonic	HENMT1	ENST00000402983.5; NM_144584.3; ENST00000370032.9; ENST00000651461.1; NM_001102592.2	c.1072A>G	p.N358D	missense	Likely Benign	Tolerated	0.32	Benign	< 10	115379157	0.271	RCV000961296.1
1	109202466	109202466	p13.3	G	A	SNV	Intronic	HENMT1	ENST00000402983.5; NM_144584.3; ENST00000370032.9; ENST00000651461.1; NM_001102592.2	c.21+20C>T			Uncertain Significance				< 10	183397823	0.072
1	109238329	109238329	p13.3	G	A	SNV	Exonic; 5'UTR	PRPF38B	NM_001349770.2; NM_001349764.2; NM_001349768.2; NM_001349757.2; NM_001349763.2; ENST00000370022.9; NM_001349767.2; ENST00000370021.1; NM_001349762.2; NM_001349761.2; ENST00000370025.9; NM_001349765.2; NM_001349766.2; NM_001349759.2; NM_018061.4; NM_001349771.2; NM_001349769.2; NM_001349758.2	c.-279G>A; c.-335G>A; c.-391G>A; c.-164G>A; c.-325G>A; c.-52G>A; c.-395G>A; c.-381G>A; c.282G>A; c.-289G>A; c.-435G>A	p.T94T	synonymous	Likely Benign				< 10	140358618	0.199
1	109265056	109265056	p13.3	T	G	SNV	Exonic	FNDC7	NM_001144937.3	c.698T>G	p.V233G	missense	Uncertain Significance			Benign	18.25	371828658	0.002
1	109373292	109373292	p13.3	G	A	SNV	Intronic	AKNAD1	NR_049760.2; ENST00000370001.8; NM_152763.5	c.1747-20C>T; n.1959-20C>T			Uncertain Significance				< 10	192411720	0.067
1	109394964	109394964	p13.3	C	T	SNV	ncRNA; Exonic	AKNAD1	NR_049760.2; NM_152763.5; ENST00000370001.8	n.745G>A; c.323G>A	p.S108N	missense	Uncertain Significance	Tolerated	1	Benign	< 10	141182594	0.035
1	109445729	109445729	p13.3	G	T	SNV	Intronic	GPSM2	ENST00000642355.1; NM_001321039.3; ENST00000676184.1; NM_013296.5; ENST00000674914.1; ENST00000441735.2; ENST00000645164.2; ENST00000674700.1; ENST00000675087.1; ENST00000264126.9; ENST00000675086.1; NM_001321038.2	c.897-19G>T; c.954-19G>T; c.1005-19G>T			Likely Benign				< 10	17030744	0.091	RCV001586604.1
1	109472315	109472315	p13.3	A	G	SNV	Intronic; ncRNA; 3'UTR	GPSM2; CLCC1	NM_001377462.1; NM_001278203.1; ENST00000674914.1; NM_001278202.2; NM_001377463.1; NM_001377468.1; NM_001377469.1; ENST00000674700.1; ENST00000675087.1; NR_165299.1; ENST00000264126.9; ENST00000675086.1; NM_001377460.1; NM_001377461.1; NM_001377466.1; ENST00000642355.1; NM_001321039.3; NM_015127.5; ENST00000675018.1; NM_013296.5; ENST00000676184.1; NM_001377467.1; NM_001377470.1; ENST00000645164.…	c.*2859T>C; c.1816-8A>G; n.5125T>C; c.1867-8A>G; c.*2854T>C; c.1639-8A>G; c.1544-8A>G			Uncertain Significance				15.91	138132875	0.074	RCV000150795.3; RCV000972365.2
1	109472327	109472327	p13.3	C	T	SNV	Exonic; ncRNA; 3'UTR	GPSM2; CLCC1	NM_001377462.1; NM_001278203.1; ENST00000674914.1; NM_001278202.2; NM_001377463.1; NM_001377468.1; ENST00000674700.1; NM_001377469.1; ENST00000675087.1; ENST00000264126.9; NM_001377460.1; ENST00000675086.1; NR_165299.1; NM_001377461.1; NM_001377466.1; ENST00000642355.1; NM_001321039.3; ENST00000676184.1; ENST00000675018.1; NM_015127.5; NM_013296.5; NM_001377467.1; NM_001377470.1; ENST00000645164.…	c.1548C>T; c.1871C>T; c.*2847G>A; c.1820C>T; c.1643C>T; c.*2842G>A; n.5113G>A	p.S624F; p.S548F; p.I516I; p.S607F	missense; synonymous	Likely Benign	Damaging	0	Probably Damaging	32	35322815	0.236	RCV000514772.4; RCV000150796.2
1	109472416	109472416	p13.3	C	T	SNV	Exonic; ncRNA; 3'UTR	GPSM2; CLCC1	NM_001377462.1; NM_001278203.1; ENST00000674914.1; NM_001278202.2; NM_001377463.1; NM_001377468.1; ENST00000674700.1; NM_001377469.1; ENST00000675087.1; ENST00000264126.9; NM_001377460.1; ENST00000675086.1; NR_165299.1; NM_001377461.1; NM_001377466.1; ENST00000642355.1; NM_001321039.3; ENST00000676184.1; ENST00000675018.1; NM_015127.5; NM_013296.5; NM_001377467.1; NM_001377470.1; ENST00000645164.…	n.5024G>A; c.*77C>T; c.*2753G>A; c.1732C>T; c.*2758G>A; c.1909C>T; c.1960C>T	p.R578W; p.R654W; p.R637W	missense	Uncertain Significance	Damaging	0	Probably Damaging	31	189033496	0.017	RCV000193105.1; RCV000764929.2					5137355	0.43
1	109492478	109492478	p13.3	T	C	SNV	Exonic; Intronic; ncRNA; 5'UTR	CLCC1	NM_001377462.1; NM_001278203.1; ENST00000674849.1; ENST00000302500.5; NM_001278202.2; NM_001377463.1; NM_001377468.1; NM_001377469.1; ENST00000675650.1; ENST00000675508.1; NM_001377460.1; NR_165299.1; NM_001377461.1; NM_001377466.1; ENST00000675571.1; ENST00000676454.1; ENST00000675018.1; NM_015127.5; NM_001377467.1; ENST00000675790.1; ENST00000675956.1; ENST00000676392.1; NM_001377470.1; NM_0013…	c.195A>G; n.491A>G; c.-166A>G; c.129+453A>G; c.-268A>G; c.111A>G	p.S65S; p.S37S	synonymous	Likely Benign				< 10	34281840	0.208	RCV001521798.1
1	109737108	109737108	p13.3	C	T	SNV	Exonic	ELAPOR1	NM_020775.5; NM_001267048.2; NM_001284353.2; ENST00000529753.5; NM_001284352.2	c.1752C>T; c.2013C>T; c.999C>T; c.1707C>T	p.Y569Y; p.Y671Y; p.Y584Y; p.Y333Y	synonymous	Uncertain Significance				< 10	151127495	0.054
1	109780003	109780003	p13.3	T	C	SNV	Intronic	SARS1	NM_001330669.1; ENST00000234677.7; NM_006513.4	c.1387+8T>C; c.1453+8T>C			Likely Benign				< 10	74854256	0.282	RCV000883017.2
1	109793319	109793319	p13.3	C	T	SNV	Exonic	CELSR2	NM_001408.3; ENST00000271332.4	c.618C>T	p.I206I	synonymous	Likely Benign				< 10	41279700	0.322	RCV000892604.2
1	109794321	109794321	p13.3	G	A	SNV	Exonic	CELSR2	NM_001408.3; ENST00000271332.4	c.1620G>A	p.L540L	synonymous	Likely Benign				< 10	112857965	0.136
1	109808448	109808448	p13.3	A	G	SNV	Exonic	CELSR2	NM_001408.3; ENST00000271332.4	c.5819A>G	p.D1940G	missense	Uncertain Significance	Damaging	0.01	Benign	23.9	148393417	0.048	RCV000883806.1
1	109812712	109812712	p13.3	C	G	SNV	Exonic	CELSR2	NM_001408.3; ENST00000271332.4	c.7265C>G	p.A2422G	missense	Uncertain Significance	Damaging	0.01	Possibly Damaging	26.6	74116308	0.105
1	109822750	109822750	p13.3	A	G	SNV	Exonic; 3'UTR	PSRC1	NM_001363309.2; ENST00000369909.6; ENST00000369907.7; NM_032636.8; NM_001032291.3; NM_001350242.2; ENST00000409138.6; ENST00000369904.7; NM_001005290.4; NM_001350239.2; NM_001350241.2; NM_001350237.2; NM_001350240.2; NM_001350238.2	c.926T>C; c.*25T>C	p.L309P	missense	Uncertain Significance			Benign	12.38	57931635	0.119
1	109823796	109823796	p13.3	G	A	SNV	Exonic	PSRC1	NM_001363309.2; ENST00000369909.6; ENST00000369907.7; NM_032636.8; NM_001032291.3; NM_001350242.2; ENST00000409138.6; ENST00000369904.7; NM_001350239.2; NM_001350241.2; NM_001005290.4; NM_001350237.2; NM_001350240.2; NM_001350238.2	c.597C>T	p.V199V	synonymous	Likely Benign				< 10	115080838	0.208
1	109840122	109840122	p13.3	C	A	SNV	Exonic	MYBPHL	ENST00000357155.2; NM_001265613.2; NM_001010985.3	c.352G>T	p.A118S	missense	Uncertain Significance	Tolerated	0.95	Benign	13.86	142270824	0.105
1	109840834	109840834	p13.3	A	G	SNV	Exonic	MYBPHL	ENST00000357155.2; NM_001265613.2; NM_001010985.3	c.191T>C	p.I64T	missense	Uncertain Significance	Damaging	0.03	Possibly Damaging	23.1	145366916	0.205
1	109859485	109859485	p13.3	C	T	SNV	Exonic	SORT1	NM_002959.7; NM_001205228.2; ENST00000256637.8; ENST00000538502.5	c.2237G>A; c.1826G>A	p.S746N; p.S609N	missense	Likely Benign	Tolerated	0.98	Benign	17.42	72646588	0.163	RCV000968528.1
1	109897981	109897981	p13.3	A	T	SNV	Intronic	SORT1	NM_002959.7; NM_001205228.2; ENST00000256637.8; ENST00000538502.5	c.543+8T>A; c.135+8T>A			Uncertain Significance				11.41	150041247	0.085	RCV000966759.1
1	110038772	110038772	p13.3	T	A	SNV	Exonic; 3'UTR	CYB561D1	ENST00000420578.7; NM_001134402.2; ENST00000533024.5; NM_182580.3; NM_001134400.2; ENST00000496961.5; ENST00000310611.8; NM_001134404.2; ENST00000430195.2; ENST00000369868.7; ENST00000527072.5; NM_001134403.2	c.581T>A; c.*463T>A; c.647T>A; c.410T>A; c.*283T>A; c.*375T>A	p.I137N; p.I194N; p.I216N	missense	Uncertain Significance	Damaging	0.01	Possibly Damaging	27	114578308	0.076
1	110038773	110038773	p13.3	C	T	SNV	Exonic; 3'UTR	CYB561D1	ENST00000420578.7; NM_001134402.2; ENST00000533024.5; NM_182580.3; NM_001134400.2; ENST00000496961.5; ENST00000310611.8; NM_001134404.2; ENST00000430195.2; ENST00000369868.7; ENST00000527072.5; NM_001134403.2	c.582C>T; c.648C>T; c.*464C>T; c.411C>T; c.*284C>T; c.*376C>T	p.I216I; p.I137I; p.I194I	synonymous	Uncertain Significance				11.43	114984951	0.076
1	110148598	110148598	p13.3	G	A	SNV	Exonic	GNAT2	NM_001379232.1; NM_005272.5; NM_001377295.2; ENST00000351050.8	c.714C>T	p.D238D	synonymous	Uncertain Significance				10.67	367863835	0.002	RCV001393561.1					2117964	2.44
1	110151344	110151344	p13.3	C	T	SNV	Exonic	GNAT2	NM_001379232.1; NM_005272.5; NM_001377295.2; ENST00000351050.8	c.370G>A	p.V124M	missense	Uncertain Significance	Tolerated	0.07	Possibly Damaging	23.8	41280330	0.509	RCV000178239.1; RCV000950060.3; RCV000377080.2
1	110168280	110168280	p13.3	C	T	SNV	Intronic	AMPD2	NM_001308170.1; ENST00000528667.7; NM_001368809.2; ENST00000667949.2; ENST00000358729.9; NM_139156.4; NM_001257361.2; NM_004037.9; ENST00000528454.5; ENST00000342115.8	c.31-4C>T; c.223-4C>T; c.160-4C>T; c.142-4C>T; c.-378-4C>T			Likely Benign				10.92	116223306	0.24	RCV001594868.1; RCV000193306.1; RCV000652182.4
1	110170866	110170866	p13.3	C	T	SNV	Exonic	AMPD2	NM_001308170.1; ENST00000528667.7; NM_001368809.2; ENST00000667949.2; ENST00000358729.9; NM_139156.4; NM_001257361.2; NM_004037.9; ENST00000528454.5; ENST00000342115.8	c.1179C>T; c.1242C>T; c.1050C>T; c.642C>T; c.1161C>T	p.Y393Y; p.Y350Y; p.Y387Y; p.Y214Y; p.Y414Y	synonymous	Uncertain Significance				10.2	114727970	0.291	RCV000192657.1; RCV000548443.5	2961251
1	110201667	110201667	p13.3	C	T	SNV	Exonic; ncRNA	GSTM4	NR_024538.2; NM_147148.3; ENST00000369836.9; NM_000850.5; ENST00000336075.6; ENST00000326729.9	c.502C>T; n.711C>T	p.R168C	missense	Uncertain Significance	Tolerated	0.08	Benign	22	114328674	0.143
1	110257647	110257647	p13.3	T	C	SNV	Exonic	GSTM5	ENST00000256593.8; NM_000851.4	c.439T>C	p.W147R	missense	Uncertain Significance	Damaging	0	Probably Damaging	23.9	150881777	0.035
1	110301920	110301920	p13.3	G	A	SNV	Exonic	EPS8L3	ENST00000361852.8; ENST00000369805.7; ENST00000361965.9; NM_001319952.2; NM_133181.4; NM_139053.3; NM_024526.4	c.345C>T; c.243C>T	p.T115T; p.T81T	synonymous	Uncertain Significance				< 10	769590945	0.004
1	110555081	110555081	p13.3	A	G	SNV	Exonic	AHCYL1	NM_001242676.2; NM_006621.7; ENST00000359172.3; ENST00000369799.10; NM_001242675.2; NM_001242673.2; ENST00000393614.8; NM_001242674.2	c.474A>G; c.333A>G	p.T158T; p.T111T	synonymous	Uncertain Significance				13.35	147232549	0.034
1	110584242	110584242	p13.3	G	A	SNV	Exonic; ncRNA	STRIP1	NM_033088.4; ENST00000369796.5; NR_073071.2; ENST00000369795.8; NM_001270768.2	c.735G>A; n.863G>A; c.450G>A	p.R245R; p.R150R	synonymous	Uncertain Significance				< 10	141770005	0.007
1	110603472	110603472	p13.3	G	A	SNV	Exonic	ALX3	NM_006492.3; ENST00000649954.1; ENST00000647563.2	c.915C>T; c.486C>T	p.P305P; p.P162P	synonymous	Likely Benign				< 10	34775503	0.146	RCV000883019.2
1	110765651	110765651	p13.3	T	C	SNV	Exonic; Intronic; ncRNA	KCNC4	NM_001377330.1; NM_001377331.1; NM_001039574.3; ENST00000369787.7; ENST00000438661.3; NR_036437.2; NM_004978.6	c.679-2946T>C; n.1930T>C; c.744T>C	p.H248H	synonymous	Likely Benign				< 10	144767142	0.267
1	110775497	110775497	p13.3	G	A	SNV	Exonic; Intronic; 3'UTR	KCNC4	NM_001377330.1; NM_001377331.1; NM_001039574.3; ENST00000369787.7; ENST00000438661.3; NR_036437.2; NM_004978.6	c.*325G>A; c.1820-36G>A; c.1846G>A; c.*566G>A; n.3383-36G>A	p.V616I	missense	Uncertain Significance				17.34	370078788	0.009
1	110950282	110950282	p13.3	G	C	SNV	Promoter; Exonic; 5'UTR	LAMTOR5-AS1; LAMTOR5	ENST00000483260.5; ENST00000602318.6; ENST00000474861.6; NR_102697.1; ENST00000256644.8; NM_006402.3; NM_001382293.1; ENST00000602858.5	n.-149G>C; c.-139C>G; c.207C>G; c.-40C>G; c.-596C>G; c.-1282C>G	p.A69A	synonymous	Likely Benign				< 10	143658007	0.174
1	111060744	111060744	p13.3	C	T	SNV	Exonic	KCNA10	NM_005549.2; ENST00000369771.4	c.666G>A	p.S222S	synonymous	Likely Benign				< 10	36028106	0.218	RCV000970055.1
1	111060848	111060848	p13.3	C		Deletion	Exonic	KCNA10	NM_005549.2; ENST00000369771.4	c.562delG	p.D188fs*60	frameshift	Uncertain Significance				33		0.035
1	111061291	111061291	p13.3	C	T	SNV	Exonic	KCNA10	NM_005549.2; ENST00000369771.4	c.119G>A	p.R40Q	missense	Uncertain Significance	Tolerated	0.28	Benign	13.57	139383016	0.004
1	111146013	111146013	p13.3	A	C	SNV	Exonic; Intronic	KCNA2	ENST00000369770.7; ENST00000675391.1; NM_001204269.2; NM_004974.4; ENST00000316361.10	c.894+498T>G; c.1392T>G	p.G464G	synonymous	Likely Benign				10.16	115456625	0.296	RCV000720504.1; RCV000552121.5; RCV000516271.1; RCV001613337.1
1	111217195	111217195	p13.3	G	C	SNV	Promoter; Exonic	KCNA3	NM_002232.5; ENST00000369769.4; NR_109845.2	n.-1119C>G; c.237C>G	p.G79G	synonymous	Likely Benign				< 10	776448082	0.008
1	111439283	111439283	p13.3	T	C	SNV	Exonic; Intronic	CD53	ENST00000271324.6; NM_001040033.2; ENST00000648608.1; NM_001320638.2; NM_000560.4	c.432T>C; c.328-1148T>C	p.C144C	synonymous	Likely Benign				< 10	79222790	0.106
1	111726906	111726906	p13.3	T	G	SNV	Exonic; ncRNA	CEPT1	NR_138484.2; ENST00000545121.5; NR_138483.2; NM_006090.5; NM_001007794.3; NR_138485.2; NM_001330743.2; ENST00000357172.9	n.1528T>G; c.1225T>G; n.1468T>G; n.1706T>G	p.S409A	missense	Uncertain Significance	Tolerated	0.78	Benign	15.99	143563214	0.083
1	111741349	111741349	p13.3	G	A	SNV	Exonic	DENND2D	NM_024901.5; NM_001271833.2; ENST00000357640.9; ENST00000369752.5	c.250C>T; c.259C>T	p.R87W; p.R84W	missense	Uncertain Significance	Damaging	0	Probably Damaging	29.9	141276517	0.023
1	111778330	111778330	p13.3	G	A	SNV	Exonic	CHI3L2	ENST00000524472.5; ENST00000369748.9; NM_001025197.1; ENST00000466741.5; NM_004000.3; NM_001025199.2	c.550G>A; c.520G>A; c.313G>A	p.V105I; p.V174I; p.V184I	missense	Likely Benign	Damaging	0.03	Possibly Damaging	23.2	34049547	0.24	RCV000948552.1
1	111781479	111781479	p13.3	C	T	SNV	Exonic	CHI3L2	ENST00000524472.5; ENST00000369748.9; NM_001025197.1; ENST00000466741.5; NM_004000.3; NM_001025199.2	c.843C>T; c.606C>T; c.813C>T	p.T202T; p.T271T; p.T281T	synonymous	Likely Benign				< 10	41281392	0.214
1	111854872	111854872	p13.2	G	A	SNV	Exonic; Intronic	CHIA	NM_001258003.2; ENST00000369740.6; NM_001258004.2; NM_001258005.2; NM_201653.4; NM_001258001.2; NM_001040623.3; NM_021797.4; ENST00000353665.10; ENST00000451398.6; NM_001258002.2; ENST00000483391.5; ENST00000430615.1	c.-200+532G>A; c.116G>A; c.-61+532G>A; c.-60-2290G>A; c.-68+532G>A; c.-67-2290G>A; c.-366+532G>A	p.G39E	missense	Uncertain Significance	Damaging	0	Probably Damaging	23.8
1	111860327	111860327	p13.2	G	T	SNV	Exonic	CHIA	NM_001258003.2; ENST00000369740.6; NM_001258004.2; NM_001258005.2; NM_001040623.3; NM_201653.4; NM_001258001.2; NM_021797.4; ENST00000353665.10; ENST00000483391.5; NM_001258002.2; ENST00000451398.6; ENST00000430615.1	c.181G>T; c.22G>T; c.505G>T	p.E169*; p.E8*; p.E61*	stop gain	Uncertain Significance				38	143586120	0.216
1	111861138	111861138	p13.2	G	A	SNV	Exonic	CHIA	NM_001258003.2; ENST00000369740.6; NM_001258004.2; NM_001258005.2; NM_021797.4; NM_001258001.2; NM_001040623.3; NM_201653.4; ENST00000353665.10; ENST00000451398.6; NM_001258002.2; ENST00000483391.5; ENST00000430615.1	c.429G>A; c.753G>A; c.270G>A	p.K143K; p.K251K; p.K90K	synonymous	Likely Benign				< 10	114510939	0.216	RCV000883809.1
1	111861268	111861268	p13.2	G	A	SNV	Exonic	CHIA	NM_001258003.2; ENST00000369740.6; NM_001258004.2; NM_001258005.2; NM_021797.4; NM_001258001.2; NM_001040623.3; NM_201653.4; ENST00000353665.10; ENST00000451398.6; NM_001258002.2; ENST00000483391.5; ENST00000430615.1	c.559G>A; c.400G>A; c.883G>A	p.A187T; p.A134T; p.A295T	missense	Likely Benign	Activating	1	Benign	18.04	79500525	0.216	RCV000883810.1
1	111861276	111861276	p13.2	G	A	SNV	Exonic	CHIA	NM_001258003.2; ENST00000369740.6; NM_001258004.2; NM_001258005.2; NM_021797.4; NM_001258001.2; NM_001040623.3; NM_201653.4; ENST00000353665.10; ENST00000451398.6; NM_001258002.2; ENST00000483391.5; ENST00000430615.1	c.408G>A; c.567G>A; c.891G>A	p.E297E; p.E136E; p.E189E	synonymous	Likely Benign				< 10	201390788	0.012
1	111861776	111861776	p13.2	G	A	SNV	Exonic	CHIA	NM_001258003.2; ENST00000369740.6; NM_001258004.2; NM_001258005.2; NM_021797.4; NM_001040623.3; NM_001258001.2; NM_201653.4; ENST00000353665.10; ENST00000451398.6; NM_001258002.2; ENST00000483391.5; ENST00000430615.1	c.467G>A; c.626G>A; c.950G>A	p.G156E; p.G209E; p.G317E	missense	Likely Benign	Tolerated	0.46	Benign	< 10	139812869	0.217	RCV000883811.1
1	111861981	111861981	p13.2	C	T	SNV	Exonic	CHIA	NM_001258003.2; ENST00000369740.6; NM_001258004.2; NM_001258005.2; NM_021797.4; NM_001258001.2; NM_001040623.3; NM_201653.4; ENST00000353665.10; ENST00000451398.6; NM_001258002.2; ENST00000483391.5; ENST00000430615.1	c.585C>T; c.1068C>T; c.744C>T	p.G248G; p.G356G; p.G195G	synonymous	Likely Benign				< 10	151038298	0.22	RCV000883812.1
1	111862064	111862064	p13.2	A	G	SNV	Exonic	CHIA	NM_001258003.2; ENST00000369740.6; NM_001258004.2; NM_001258005.2; NM_021797.4; NM_001258001.2; NM_001040623.3; NM_201653.4; ENST00000353665.10; ENST00000451398.6; NM_001258002.2; ENST00000483391.5; ENST00000430615.1	c.668A>G; c.827A>G; c.1151A>G	p.K384R; p.K223R; p.K276R	missense	Uncertain Significance	Tolerated	0.46	Possibly Damaging	16.04	143969273	0.04
1	111957538	111957538	p13.2	G	A	SNV	Exonic	OVGP1	ENST00000369732.4; NM_002557.4	c.1585C>T	p.H529Y	missense	Uncertain Significance			Benign	10.27	144666939	0.001
1	111957583	111957583	p13.2	A	G	SNV	Exonic	OVGP1	ENST00000369732.4; NM_002557.4	c.1540T>C	p.Y514H	missense	Likely Benign			Benign	< 10	1126656	0.261
1	111957721	111957721	p13.2	C	T	SNV	Exonic	OVGP1	ENST00000369732.4; NM_002557.4	c.1402G>A	p.G468R	missense	Likely Benign			Benign	13.22	115512535	0.132	RCV000965557.1
1	112269729	112269729	p13.2	C	T	SNV	Exonic	INKA2	NM_019099.5; ENST00000357260.6; NM_198926.2	c.710G>A; c.755G>A	p.S237N; p.S252N	missense	Uncertain Significance	Tolerated	0.44	Benign	15.15	201711071	0.014
1	112298764	112298764	p13.2	T	C	SNV	Promoter; Exonic	DDX20; INKA2; LOC101928718	NM_198926.2; NR_125963.1; NM_007204.5; ENST00000369702.5	c.-430A>G; c.218T>C; n.-633A>G	p.V73A	missense	Uncertain Significance	Damaging	0.02	Benign	23.5	201625401	0.055
1	112303415	112303415	p13.2	G	C	SNV	Exonic	DDX20	ENST00000369702.5; NM_007204.5	c.768G>C	p.K256N	missense	Uncertain Significance	Tolerated	0.21	Benign	22.3	139212011	0.061
1	112305578	112305580	p13.2	ATG		Deletion	Exonic	DDX20	NM_007204.5; ENST00000369702.5	c.1268_1270delTGA	p.M423del	in-frame	Uncertain Significance				19.29	538821511	0.242
1	112524716	112524716	p13.2	C	A	SNV	Exonic	KCND3	ENST00000369697.5; NM_001378970.1; NM_172198.3; ENST00000315987.6; NM_001378969.1; NM_004980.5	c.633G>T	p.P211P	synonymous	Likely Benign				< 10	35131566	0.023	RCV001089194.1; RCV000712067.3; RCV000608200.1
1	112999551	112999551	p13.2	A	G	SNV	Exonic	CTTNBP2NL	ENST00000271277.11; NM_018704.3	c.1437A>G	p.L479L	synonymous	Likely Benign				< 10	113335893	0.24
1	113068725	113068725	p13.2	T	C	SNV	Exonic; 3'UTR	ST7L; WNT2B	ENST00000369669.5; NM_138728.3; ENST00000490067.5; NM_017744.5; ENST00000369686.9; NM_024494.3; NM_001308264.2; ENST00000369684.5; ENST00000358039.9; ENST00000360743.8; NM_138727.4	c.1587A>G; c.*5594T>C; c.1638A>G; c.1089A>G; c.1545A>G	p.G363G; p.G546G; p.G515G; p.G529G	synonymous	Likely Benign				< 10	139333916	0.07
1	113197104	113197104	p13.2	C	T	SNV	Exonic	CAPZA1	NM_006135.3; ENST00000263168.4	c.237C>T	p.H79H	synonymous	Uncertain Significance				< 10	540925939	0.004						8892415	0.19
1	113238787	113238787	p13.2	C	T	SNV	Exonic	MOV10	NM_020963.5; ENST00000357443.2; NM_001321324.2; ENST00000413052.6; NM_001286072.2; ENST00000369644.5; NM_001130079.3; NM_001389562.1; NM_001369507.1; NM_001389563.1	c.1797C>T; c.1629C>T	p.D599D; p.D543D	synonymous	Likely Benign				< 10	35535483	0.07	RCV000905950.1
1	113265780	113265780	p13.2	C	T	SNV	Exonic; ncRNA	TAFA3	NR_169586.1; NM_001004440.2; NM_182759.3; ENST00000369630.7; ENST00000361886.3	n.712C>T; c.258C>T	p.C86C	synonymous	Uncertain Significance				< 10	142239254	0.023
1	113661918	113661918	p13.2	C	T	SNV	Exonic	LRIG2	ENST00000361127.6; NM_014813.3; NM_001312686.2	c.2744C>T; c.2435C>T	p.T812I; p.T915I	missense	Likely Benign	Tolerated	0.2	Possibly Damaging	24.4	115632277	0.314	RCV000954216.2
1	113933814	113933814	p13.2	C	T	SNV	Exonic	MAGI3	NM_001142782.2; ENST00000369617.8; NM_152900.3; ENST00000369611.4	c.159C>T	p.G53G	synonymous	Uncertain Significance				14.82	182574963	0.16
1	114308772	114308772	p13.2	A	G	SNV	Exonic; ncRNA	RSBN1	ENST00000615321.1; NR_130896.2; NM_018364.5; ENST00000612242.4; ENST00000616024.4; ENST00000261441.9	c.2239T>C; n.2421T>C; c.1888T>C; c.2095T>C	p.C699R; p.C630R; p.C747R	missense	Uncertain Significance			Benign	21.4	149404041	0.023
1	114377035	114377035	p13.2	A	G	SNV	Exonic; Intronic	PTPN22; AP4B1-AS1	NM_001193431.2; ENST00000420377.6; NM_015967.7; NM_001308297.1; NM_012411.5; ENST00000359785.10; ENST00000460620.5; ENST00000525799.1; ENST00000538253.5; ENST00000528414.5; NR_125965.1	c.469-14759T>C; n.414+18941A>G; c.1849T>C; c.1756T>C; c.1921T>C; c.1540T>C	p.S641P; p.S586P; p.S617P; p.S514P	missense	Uncertain Significance			Benign	14.46	146655207	0.008
1	114401662	114401662	p13.2	C	T	SNV	Exonic; Intronic	PTPN22; AP4B1-AS1	NM_001193431.2; ENST00000420377.6; NM_015967.7; ENST00000359785.10; NM_001308297.1; NM_012411.5; ENST00000460620.5; NR_037864.1; ENST00000525799.1; ENST00000538253.5; ENST00000528414.5; NR_125965.1	n.246+1024C>T; n.415-38828C>T; c.235G>A	p.D79N	missense	Uncertain Significance			Benign	27.6	144833744	0.008
1	114515970	114515970	p13.2	C	T	SNV	Exonic	HIPK1	NM_198268.3; ENST00000369558.5; NM_001369806.1; ENST00000369553.5; NM_181358.3; ENST00000340480.8; NM_001369807.1; ENST00000426820.7; NM_198269.3	c.3469C>T; c.3466C>T; c.2347C>T; c.2287C>T	p.P1157S; p.P783S; p.P763S; p.P1156S	missense	Uncertain Significance	Tolerated	0.22	Benign	21.4
1	114964226	114964226	p13.2	G	A	SNV	Exonic	TRIM33	NM_015906.4; ENST00000358465.7; NM_033020.3; ENST00000369543.6	c.1893C>T	p.P631P	synonymous	Uncertain Significance				10.58	146261393	0.031
1	115053313	115053313	p13.2	G	T	SNV	Exonic	TRIM33	NM_015906.4; ENST00000358465.7; NM_033020.3; ENST00000369543.6	c.385C>A	p.Q129K	missense	Uncertain Significance	Activating	1	Benign	19.17
1	115223095	115223095	p13.2	A	G	SNV	Exonic	AMPD1	NM_001172626.2; ENST00000369538.3; NM_000036.3; ENST00000520113.6	c.651T>C; c.639T>C; c.540T>C; c.552T>C	p.F213F; p.F184F; p.F217F; p.F180F	synonymous	Likely Benign				12.39	35197706	0.199	RCV000634524.3
1	115229504	115229504	p13.2	A	C	SNV	Exonic	AMPD1	NM_001172626.2; ENST00000369538.3; NM_000036.3; ENST00000520113.6	c.342T>G; c.231T>G; c.243T>G; c.330T>G	p.T77T; p.T114T; p.T81T; p.T110T	synonymous	Likely Benign				< 10	115655141	0.204	RCV000960526.2	189159
1	115603168	115603168	p13.2	G	A	SNV	Intronic	TSPAN2	ENST00000369516.7; NM_001308316.2; NM_001308315.2; NM_005725.6	c.271-1566C>T; c.271-9C>T			Likely Benign				16.96	189737200	0.424	RCV000948224.1
1	115829203	115829203	p13.2	C	T	SNV	Exonic; Intronic	NGF-AS1; NGF	NM_002506.3; NR_157569.1; ENST00000369512.3; ENST00000676038.2; ENST00000675637.2	c.214G>A; n.207+3342C>T	p.V72M	missense	Likely Benign	Tolerated	0.19	Probably Damaging	24.3	11466110	0.21	RCV000546440.6; RCV000603122.1
1	116243913	116243915	p13.1	ATC		Deletion	Exonic	CASQ2	ENST00000261448.6; NM_001232.4	c.1147_1149delGAT	p.D383del	in-frame	Uncertain Significance				10.58		0.027	RCV000375569.3; RCV000037131.4; RCV000769724.1
1	116380832	116380832	p13.1	G	A	SNV	Exonic	NHLH2	NM_001111061.2; ENST00000320238.3; NM_005599.3; ENST00000369506.1	c.162C>T	p.A54A	synonymous	Likely Benign				14.24	201310797	0.152
1	116534657	116534657	p13.1	C	T	SNV	Exonic	SLC22A15	ENST00000369503.9; NM_018420.3; ENST00000369502.1	c.93C>T	p.Y31Y	synonymous	Uncertain Significance				< 10	773129275	0.002
1	117122285	117122285	p13.1	G	C	SNV	Exonic	IGSF3	NM_001542.4; ENST00000369486.8; NM_001007237.3; ENST00000318837.6	c.3123C>G; c.3063C>G	p.D1021E; p.D1041E	missense	Likely Benign	Tolerated	0.78	Benign	< 10	114915440	0.704
1	117142700	117142700	p13.1	C	A	SNV	Exonic	IGSF3	NM_001542.4; ENST00000369486.8; NM_001007237.3; ENST00000318837.6	c.1952G>T; c.1892G>T	p.S631I; p.S651I	missense	Uncertain Significance	Tolerated	0.51	Possibly Damaging	24.5	75947003	0.002						4142196	0.64
1	117142736	117142736	p13.1	A	G	SNV	Exonic	IGSF3	NM_001542.4; ENST00000369486.8; NM_001007237.3; ENST00000318837.6	c.1856T>C; c.1916T>C	p.I639T; p.I619T	missense	Uncertain Significance	Damaging	0.01	Benign	23.7	75067537	0.037						1491687	1.02
1	117142855	117142855	p13.1	C	T	SNV	Exonic	IGSF3	NM_001542.4; ENST00000369486.8; NM_001007237.3; ENST00000318837.6	c.1737G>A; c.1797G>A	p.S599S; p.S579S	synonymous	Uncertain Significance				< 10	61786568	0.011
1	117142868	117142868	p13.1	C	T	SNV	Exonic	IGSF3	NM_001542.4; ENST00000369486.8; NM_001007237.3; ENST00000318837.6	c.1724G>A; c.1784G>A	p.W595*; p.W575*	stop gain	Uncertain Significance				41	61730489	0.001	RCV001169932.2					1560065	6.47
1	117142869	117142869	p13.1	A	G	SNV	Exonic	IGSF3	NM_001542.4; ENST00000369486.8; NM_001007237.3; ENST00000318837.6	c.1723T>C; c.1783T>C	p.W595R; p.W575R	missense	Uncertain Significance	Activating	0.85	Benign	< 10	78806598	0.003
1	117146476	117146476	p13.1	C	G	SNV	Exonic	IGSF3	NM_001542.4; ENST00000369486.8; NM_001007237.3; ENST00000318837.6	c.1394G>C; c.1454G>C	p.R465P; p.R485P	missense	Uncertain Significance	Damaging	0.01	Probably Damaging	25.7
1	117146504	117146504	p13.1	G	A	SNV	Exonic	IGSF3	NM_001542.4; ENST00000369486.8; NM_001007237.3; ENST00000318837.6	c.1366C>T; c.1426C>T	p.R476C; p.R456C	missense	Likely Pathogenic	Damaging	0.02	Probably Damaging	32	61786577	0.001						4142200	1.53
1	117146545	117146545	p13.1	C	A	SNV	Exonic	IGSF3	NM_001542.4; ENST00000369486.8; NM_001007237.3; ENST00000318837.6	c.1385G>T; c.1325G>T	p.G442V; p.G462V	missense	Uncertain Significance	Tolerated	0.13	Benign	25	916107440
1	117146563	117146563	p13.1	G	A	SNV	Exonic	IGSF3	NM_001542.4; ENST00000369486.8; NM_001007237.3; ENST00000318837.6	c.1307C>T; c.1367C>T	p.T436M; p.T456M	missense	Uncertain Significance	Tolerated	0.14	Benign	23	61786578	0.002						4142204	0.74
1	117146571	117146571	p13.1	A	G	SNV	Exonic	IGSF3	NM_001542.4; ENST00000369486.8; NM_001007237.3; ENST00000318837.6	c.1299T>C; c.1359T>C	p.S453S; p.S433S	synonymous	Likely Benign				< 10	61786579	0						5457958	0.86
1	117150564	117150564	p13.1	T	C	SNV	Exonic	IGSF3	NM_001542.4; ENST00000369486.8; NM_001007237.3; ENST00000318837.6	c.1222A>G	p.K408E; p.T408A	missense	Uncertain Significance	Tolerated	0.79	Benign	23.1	199735707
1	117150617	117150617	p13.1	A	G	SNV	Exonic	IGSF3	NM_001542.4; ENST00000369486.8; NM_001007237.3; ENST00000318837.6	c.1169T>C	p.I390T	missense	Uncertain Significance	Tolerated	0.39	Benign	23.5	61786588	0.001						4142210	0.71
1	117150736	117150736	p13.1	C	G	SNV	Exonic	IGSF3	NM_001542.4; ENST00000369486.8; NM_001007237.3; ENST00000318837.6	c.1050G>C	p.K350N	missense	Uncertain Significance	Tolerated	0.14	Benign	< 10	61786589	0.001						4142212	0.67
1	117150870	117150870	p13.1	C	A	SNV	Exonic	IGSF3	NM_001542.4; ENST00000369486.8; NM_001007237.3; ENST00000318837.6	c.916G>T	p.A306S	missense	Uncertain Significance	Tolerated	0.09	Possibly Damaging	23.9
1	117150895	117150895	p13.1	C	T	SNV	Exonic	IGSF3	NM_001542.4; ENST00000369486.8; NM_001007237.3; ENST00000318837.6	c.891G>A	p.P297P	synonymous	Uncertain Significance				< 10	61730485	0.001
1	117150928	117150928	p13.1	C	T	SNV	Exonic	IGSF3	NM_001542.4; ENST00000369486.8; NM_001007237.3; ENST00000318837.6	c.858G>A	p.E286E	synonymous	Uncertain Significance				< 10	150982249							3930288	0.94
1	117150933	117150933	p13.1	G	A	SNV	Exonic	IGSF3	NM_001542.4; ENST00000369486.8; NM_001007237.3; ENST00000318837.6	c.853C>T	p.L285L	synonymous	Uncertain Significance				< 10	115837117							3930290	0.56
1	117156459	117156459	p13.1	C	T	SNV	Exonic	IGSF3	NM_001542.4; ENST00000369486.8; NM_001007237.3; ENST00000318837.6	c.760G>A	p.D254N	missense	Likely Pathogenic	Damaging	0	Probably Damaging	28.1	61786651							4142216	1.58
1	117156490	117156490	p13.1	T	C	SNV	Exonic	IGSF3	NM_001542.4; ENST00000369486.8; NM_001007237.3; ENST00000318837.6	c.729A>G	p.E243E	synonymous	Uncertain Significance				11.33	61786652	0.016						5482774	0.27
1	117158972	117158972	p13.1	A	G	SNV	Exonic	IGSF3	NM_001542.4; ENST00000369486.8; NM_001007237.3; ENST00000318837.6	c.151T>C	p.S51P	missense	Uncertain Significance	Damaging	0.02	Benign	< 10	3965246	0
1	117159024	117159024	p13.1	C	A	SNV	Exonic	IGSF3	NM_001542.4; ENST00000369486.8; NM_001007237.3; ENST00000318837.6	c.99G>T	p.T33T	synonymous	Uncertain Significance				< 10
1	117208959	117208959	p13.1	T	C	SNV	5'UTR	IGSF3	NM_001542.4; ENST00000369486.8; NM_001007237.3; ENST00000318837.6	c.-11A>G			Uncertain Significance				14.8	180850177	0.08
1	117311294	117311294	p13.1	G	A	SNV	Exonic	CD2	ENST00000369478.4; NM_001328609.2; NM_001767.5	c.1023G>A; c.945G>A	p.P341P; p.P315P	synonymous	Likely Benign				< 10	35591188	0.241	RCV000974036.1
1	117509675	117509675	p13.1	C	T	SNV	Exonic	PTGFRN	ENST00000393203.3; NM_020440.4	c.1782C>T	p.G594G	synonymous	Uncertain Significance				< 10	777591467	0.001
1	117576612	117576612	p13.1	A	G	SNV	Exonic; Intronic	LOC101929099; CD101	ENST00000256652.8; NM_004258.6; NM_001256106.3; ENST00000369470.1; NM_001256109.3; NM_001256111.3; NR_110786.1	c.2955A>G; c.2769A>G; n.287-1654T>C	p.S923S; p.S985S	synonymous	Likely Benign				< 10	34512192	0.139	RCV000965559.1
1	117576679	117576679	p13.1	A	G	SNV	Exonic; Intronic	LOC101929099; CD101	ENST00000256652.8; NM_004258.6; NM_001256106.3; ENST00000369470.1; NM_001256109.3; NM_001256111.3; NR_110786.1	n.287-1721T>C; c.3022A>G; c.2836A>G	p.T1008A; p.T946A	missense	Likely Benign	Tolerated	0.48	Benign	< 10	150494742	0.149
1	117617973	117617973	p13.1	A	G	SNV	Exonic	TTF2	ENST00000369466.9; NM_003594.4	c.767A>G	p.E256G	missense	Likely Benign	Tolerated	0.21	Benign	< 10	34334470	0.199
1	117619355	117619355	p13.1	C	T	SNV	Exonic	TTF2	ENST00000369466.9; NM_003594.4	c.1483C>T	p.L495F	missense	Likely Benign	Tolerated	0.08	Possibly Damaging	17.8	61737095	0.167	RCV000893118.1
1	117629096	117629096	p13.1	C	T	SNV	Exonic	TTF2	ENST00000369466.9; NM_003594.4	c.2112C>T	p.P704P	synonymous	Uncertain Significance				10.65	34703179	0.169
1	117638005	117638005	p13.1	C	T	SNV	Intronic	TTF2	ENST00000369466.9; NM_003594.4	c.3035+16C>T			Likely Benign				< 10	116499269	0.274
1	117695900	117695901	p13.1		A	Insertion	Exonic; ncRNA; Intronic	VTCN1	ENST00000359008.4; ENST00000463461.1; NM_024626.4; ENST00000539893.1; ENST00000369458.3; NM_001253850.2; ENST00000328189.3; NM_001253849.2; NR_045604.2; NR_045603.2	c.536dupT; n.432-30dupT; c.188dupT; n.698dupT; c.545dupT; c.251dupT	p.V64fs*7; p.V180fs*7; p.V183fs*7; p.V85fs*7	frameshift	Uncertain Significance				33	774296871	0
1	117695902	117695902	p13.1	C	T	SNV	Exonic; ncRNA; Intronic	VTCN1	ENST00000359008.4; ENST00000463461.1; NM_024626.4; ENST00000539893.1; ENST00000369458.3; NM_001253850.2; ENST00000328189.3; NM_001253849.2; NR_045604.2; NR_045603.2	n.432-31G>A; n.697G>A; c.535G>A; c.544G>A; c.187G>A; c.250G>A	p.V182M; p.V179M; p.V63M; p.V84M	missense	Uncertain Significance	Damaging	0.01	Probably Damaging	25.8	780991131	0
1	118035782	118035782	p12	C	T	SNV	Exonic	MAN1A2	ENST00000356554.7; NM_006699.5	c.1182C>T	p.V394V	synonymous	Likely Benign				< 10	115084439	0.108
1	118166444	118166444	p12	C	T	SNV	Exonic	TENT5C	NM_017709.4; ENST00000369448.4	c.954C>T	p.T318T	synonymous	Uncertain Significance				< 10	192636325	0.017
1	118461272	118461272	p12	C	G	SNV	Exonic	GDAP2	NM_001135589.3; ENST00000369443.10; NM_017686.4; ENST00000369442.3	c.263G>C	p.S88T	missense	Uncertain Significance	Tolerated	0.15	Benign	22.9	1040682741
1	118462915	118462915	p12	T	C	SNV	Exonic	GDAP2	NM_001135589.3; ENST00000369443.10; NM_017686.4; ENST00000369442.3	c.66A>G	p.S22S	synonymous	Likely Benign				< 10	35307065	0.112
1	118492737	118492737	p12	A	G	SNV	Exonic	WDR3	NM_006784.3; ENST00000349139.6	c.1730A>G	p.Y577C	missense	Uncertain Significance	Damaging	0	Probably Damaging	29.7	773460408	0.003						8506558	0.18
1	118527339	118527339	p12	A	T	SNV	Exonic	SPAG17	ENST00000336338.10; NM_206996.4	c.5736T>A	p.F1912L	missense	Uncertain Significance	Damaging	0.03	Benign	14.27	148831157	0.058
1	118530471	118530471	p12	C	T	SNV	Exonic	SPAG17	ENST00000336338.10; NM_206996.4	c.5655G>A	p.K1885K	synonymous	Likely Benign				< 10	115088568	0.14
1	118584562	118584562	p12	T	C	SNV	Exonic	SPAG17	ENST00000336338.10; NM_206996.4	c.2918A>G	p.D973G	missense	Uncertain Significance	Tolerated	0.42	Benign	14.99	77499057	0.144
1	118598486	118598486	p12	T	C	SNV	Exonic	SPAG17	ENST00000336338.10; NM_206996.4	c.2592A>G	p.E864E	synonymous	Likely Benign				< 10	79742727	0.156
1	119925632	119925632	p12	G	A	SNV	Exonic	HAO2	ENST00000361035.8; NM_016527.4; ENST00000325945.4; NM_001005783.3; ENST00000622548.4; NM_001377472.1	c.226G>A; c.265G>A	p.A89T; p.A76T	missense	Uncertain Significance	Damaging	0		18.23	41313995	0.089
1	120056895	120056895	p12	G	C	SNV	Exonic	HSD3B1	ENST00000528909.1; NM_001328615.1; ENST00000369413.8; NM_000862.3	c.749G>C	p.R250P	missense	Uncertain Significance	Tolerated	0.18	Benign	14.25
1	120266077	120266077	p12	C	G	SNV	Intronic	PHGDH	ENST00000641074.1; ENST00000641023.2; ENST00000641597.1; ENST00000641115.1; ENST00000369409.9; NM_006623.4	c.356+13C>G			Uncertain Significance				12.71	184901459	0.008
1	120277341	120277341	p12	C	G	SNV	Exonic	PHGDH	ENST00000641074.1; ENST00000641023.2; ENST00000641597.1; ENST00000641115.1; ENST00000369409.9; NM_006623.4	c.595C>G	p.L199V	missense	Likely Benign			Benign	18.81	77632964	0.198	RCV001085047.3; RCV000712535.3
1	120277370	120277370	p12	T	C	SNV	Exonic	PHGDH	ENST00000641074.1; ENST00000641023.2; ENST00000641597.1; ENST00000641115.1; ENST00000369409.9; NM_006623.4	c.624T>C	p.P208P	synonymous	Likely Benign				12.41	77401816	0.204	RCV000358986.6; RCV000712536.3
1	120300050	120300050	p12	G	T	SNV	Exonic	HMGCS2	NM_005518.4; ENST00000544913.2; NM_001166107.1; ENST00000369406.8	c.862C>A; c.736C>A	p.R246R; p.R288R	synonymous	Likely Benign				< 10	142637231	0.082	RCV000431451.2; RCV000392896.6
1	120341193	120341193	p12	C	T	SNV	Exonic	REG4	NM_032044.4; NM_001159352.2; ENST00000354219.5; ENST00000256585.10	c.336G>A	p.M112I	missense	Likely Benign	Tolerated	0.41	Benign	< 10	75358916	0.297
1	120438093	120438093	p12	T	C	SNV	Exonic	ADAM30	ENST00000369400.2; NM_021794.4	c.867A>G	p.S289S	synonymous	Uncertain Significance				< 10	1016757267
1	120468128	120468128	p12	G	A	SNV	Exonic	NOTCH2	NM_024408.4; ENST00000256646.7	c.4311C>T	p.G1437G	synonymous	Likely Benign				< 10	34561092	0.275	RCV000546017.4; RCV001589321.1; RCV000264402.1	189657				9497161	0.19
1	120539915	120539915	p12	G	A	SNV	Exonic	NOTCH2	NM_024408.4; ENST00000602566.6; NM_001200001.2; ENST00000256646.7; ENST00000652302.1; ENST00000579475.7	c.339C>T; c.456C>T	p.P113P; p.P152P	synonymous	Uncertain Significance				10.23	143287927	0.183	RCV001529632.2	189701
1	120930223	120930223	p11.2	C	T	SNV	Exonic; ncRNA; Intronic	LOC100996318; FCGR1B	NR_164758.1; NR_164760.1; ENST00000369384.4; NR_045213.2; ENST00000369383.4; NR_158169.1; ENST00000472543.1; NR_164759.1	c.378G>A; n.152G>A; n.415G>A; c.102G>A; n.1674-298C>T; n.428G>A	p.A126A; p.A34A	synonymous	Likely Benign				< 10	146386434	0.141
1	144816674	144816674	q21.1	T	C	SNV	Exonic	NBPF9	NM_001388376.1; NM_001388382.1; NM_001388371.1; NM_001388369.1; NM_001388383.1; NM_001388384.1; NM_001388373.1; NM_001388372.1; NM_001388366.1; NM_001037675.4; NM_001388377.1; NM_001388374.1; NM_001388367.1; NM_001388378.1; NM_001277444.2; NM_001388381.1; NM_001388375.1; NM_001388379.1; NM_001388368.1; NM_001388370.1	c.1581T>C	p.I527I	synonymous	Likely Benign				< 10	587647349	0.018
1	144825389	144825389	q21.1	A	C	SNV	Exonic	NBPF9	NM_001388376.1; NM_001388382.1; NM_001388371.1; NM_001388369.1; NM_001388384.1; NM_001388383.1; NM_001388373.1; NM_001388372.1; NM_001388366.1; NM_001037675.4; NM_001388377.1; NM_001388374.1; NM_001388367.1; NM_001388378.1; NM_001277444.2; NM_001388381.1; NM_001388375.1; NM_001388379.1; NM_001388368.1; NM_001388370.1	c.2004A>C; c.2115A>C	p.E668D; p.E705D	missense	Uncertain Significance	Tolerated	0.08		12.93	587774394	0.018
1	144852418	144852418	q21.1	T	C	SNV	Exonic; 3'UTR	PDE4DIP	NM_001198832.3; ENST00000618462.4; NM_001377393.1; NM_001350521.3; ENST00000369356.8; NM_001350520.1; NM_001377392.1; NM_001350523.2; ENST00000369354.7; NM_014644.6; NM_001198834.4; NM_001350522.2	c.7319A>G; c.7025A>G; c.*40A>G; c.6974A>G; c.7005C>A *; c.6704A>G	p.Q2325R; p.Q2440R; p.Q2342R; p.S2335R; p.Q2235R	missense	Uncertain Significance	Damaging	0.05		12.22	112796865	0.2
1	144863325	144863325	q21.1	C	T	SNV	Exonic	PDE4DIP	ENST00000618462.4; NM_001198832.3; NM_001377393.1; NM_001350521.3; ENST00000369356.8; NM_001350520.1; NM_001377392.1; NM_001350523.2; ENST00000369354.7; NM_014644.6; NM_001198834.4; NM_001350522.2	c.5760G>A; c.6564G>A; c.6078G>A; c.6276G>A; c.5946G>A; c.6489G>A; c.5757G>A	p.G2163G; p.G2092G; p.G1919G; p.G1982G; p.G2026G; p.G2188G; p.G1920G	synonymous	Likely Benign				< 10	150148081	0.015
1	144923696	144923696	q21.1	G	C	SNV	Exonic	PDE4DIP	ENST00000313431.13; NM_001002812.3; ENST00000618462.4; NM_001198832.3; ENST00000529945.2; ENST00000369349.7; ENST00000369356.8; NM_001377393.1; NM_001350521.3; NM_001350520.1; NM_001002811.2; ENST00000369351.7; NM_001377392.1; NM_001350523.2; ENST00000369354.7; NM_014644.6; NM_001198834.4; NM_001350522.2	c.960C>G; c.1251C>G; c.762C>G; c.1173C>G	p.T417T; p.T254T; p.T320T; p.T391T	synonymous	Uncertain Significance				11.2	1553508776	0
1	145103949	145103949	q21.1	A	T	SNV	Exonic	SEC22B	ENST00000578049.4	c.97A>T	p.T33S	missense	Uncertain Significance				16.31	375599073	0.01
1	145209369	145209369	q21.1	C	T	SNV	Exonic; 5'UTR	NOTCH2NLA; NOTCH2NLC; NOTCH2NLB	NM_001364006.1; NM_203458.5; ENST00000650865.1; ENST00000593495.3; ENST00000652191.1; ENST00000579793.6; ENST00000362074.7	c.61C>T; c.-112C>T; c.-65C>T; c.-110C>T	p.R21C	missense	Uncertain Significance				18.66	782303921	0.001
1	145281952	145281952	q21.1	T	C	SNV	Intronic	NOTCH2NLA; NOTCH2NLC; NOTCH2NLB	NM_001364006.1; NM_203458.5; ENST00000578189.1; ENST00000650865.1; ENST00000593495.3; ENST00000652191.1; ENST00000579793.6; ENST00000362074.7	c.797-3T>C; c.674-3T>C; c.635-3T>C; c.634+248T>C			Uncertain Significance				13.41	201831124	0.069
1	145295509	145295509	q21.1	C	A	SNV	Exonic	NBPF10	NM_001039703.6; NM_001302371.3	c.262C>A	p.Q88K	missense	Uncertain Significance				< 10	782265105	0.005
1	145297627	145297627	q21.1	G	A	SNV	Exonic	NBPF10	NM_001039703.6; NM_001302371.3	c.502G>A	p.E168K	missense	Uncertain Significance				< 10	59644157	0.076
1	145299900	145299900	q21.1	C	T	SNV	Exonic	NBPF10	NM_001039703.6; NM_001302371.3	c.949C>T	p.Q317*	stop gain	Uncertain Significance				22.8	781914537	0.001
1	145299908	145299908	q21.1	C	T	SNV	Exonic	NBPF10	NM_001039703.6; NM_001302371.3	c.957C>T	p.S319S	synonymous	Likely Benign				< 10	200601559	0.313
1	145299916	145299916	q21.1	T	G	SNV	Exonic	NBPF10	NM_001039703.6; NM_001302371.3	c.965T>G	p.L322R	missense	Uncertain Significance				17.9	374151992	0.182
1	145311942	145311942	q21.1	G	C	SNV	Exonic	NBPF10	NM_001039703.6; NM_001302371.3	c.2010G>C	p.L670F	missense	Uncertain Significance				< 10	587680392	0.033
1	145368473	145368473	q21.1	G	A	SNV	Exonic	NBPF10	NM_001039703.6; NM_001302371.3	c.11177G>A; c.10670G>A	p.R3726H; p.R3557H	missense	Benign				< 10	1043749	0.595
1	145416447	145416447	q21.1	G	C	SNV	Exonic	HJV	ENST00000357836.5; NM_145277.5; NM_001379352.1; ENST00000497365.5; NM_001316767.2; ENST00000336751.11; NM_202004.4; NM_213653.4; NM_213652.4; ENST00000475797.1	c.453G>C; c.114G>C; c.792G>C	p.S38S; p.S151S; p.S264S	synonymous	Likely Benign				< 10	35710964	0.153	RCV000644854.4; RCV001102156.1
1	145457621	145457621	q21.1	C	T	SNV	Intronic	POLR3GL	ENST00000369313.7; NM_032305.3; ENST00000369314.2; NM_001330685.2	c.257-17G>A; c.326-17G>A			Likely Benign				< 10	115138654	0.111
1	145508010	145508010	q21.1	T	C	SNV	Intronic; ncRNA	RBM8A; LIX1L-AS1	ENST00000369307.4; NM_005105.5; ENST00000583313.7; NR_147182.1	c.68-6T>C; n.136A>G			Likely Benign				< 10	112273321	0.258	RCV001593145.1; RCV000952080.3
1	145532823	145532823	q21.1	G	A	SNV	Exonic	ITGA10	NM_001303040.2; NM_003637.5; ENST00000369304.8; NM_001303041.2; ENST00000539363.2	c.1142G>A; c.749G>A; c.713G>A	p.R250Q; p.R381Q; p.R238Q	missense	Uncertain Significance	Tolerated	0.35	Benign	15.87	6665210	0.175
1	145539046	145539046	q21.1	C	T	SNV	Exonic	ITGA10	NM_001303040.2; NM_003637.5; ENST00000369304.8; NM_001303041.2; ENST00000539363.2	c.2593C>T; c.2557C>T; c.2986C>T	p.H853Y; p.H865Y; p.H996Y	missense	Uncertain Significance	Tolerated	0.19	Benign	16.61	114026541	0.138
1	145558876	145558876	q21.1	C	T	SNV	Exonic	ANKRD35	NM_001280799.2; NM_144698.5; ENST00000355594.9	c.225C>T; c.495C>T	p.H75H; p.H165H	synonymous	Likely Benign				< 10	34180444	0.104
1	145561334	145561334	q21.1	C	T	SNV	Exonic	ANKRD35	NM_001280799.2; NM_144698.5; ENST00000355594.9	c.752C>T; c.1022C>T	p.A341V; p.A251V	missense	Uncertain Significance	Tolerated	1	Benign	< 10	140072705	0.036
1	145562149	145562149	q21.1	C	A	SNV	Exonic	ANKRD35	NM_001280799.2; NM_144698.5; ENST00000355594.9	c.1567C>A; c.1837C>A	p.L523M; p.L613M	missense	Uncertain Significance	Tolerated	0.22	Probably Damaging	24.3	143087712	0.106
1	145578271	145578271	q21.1	C	T	SNV	Exonic	PIAS3	NM_006099.3; ENST00000393045.7	c.234C>T	p.L78L	synonymous	Likely Benign				< 10	144203391	0.007
1	145688190	145688193	q21.1	CAGT		Deletion	Exonic	RNF115	ENST00000582693.5; NM_014455.4	c.888_891delTCAG	p.Q297fs*?	frameshift	Uncertain Significance				33	782103426	0.003
1	146397369	146397369	q21.1	G	C	SNV	Intronic; Exonic	NBPF14; NBPF25P	NR_104217.1; NM_015383.2	n.632+1853G>C; c.186G>C	p.E62D	missense	Uncertain Significance				< 10	188072901	0.027
1	146397407	146397407	q21.1	G	T	SNV	Intronic; Exonic	NBPF14; NBPF25P	NR_104217.1; NM_015383.2	c.224G>T; n.632+1891G>T	p.R75L	missense	Likely Benign				< 10	587698123	0.213
1	146398489	146398489	q21.1	G	T	SNV	Intronic; Exonic	NBPF14; NBPF25P	NR_104217.1; NM_015383.2	c.475G>T; n.632+2973G>T	p.V159F	missense	Uncertain Significance				13.99	149250634	0
1	146631181	146631181	q21.1	T	C	SNV	ncRNA; Exonic	PRKAB2	ENST00000254101.4; NR_103871.2; NM_005399.5; NR_103870.2	n.680A>G; c.782A>G; n.559A>G	p.K261R	missense	Uncertain Significance	Damaging	0.01	Probably Damaging	28.7	1439387336	0.001
1	146631230	146631230	q21.1	A	G	SNV	Intronic	PRKAB2	ENST00000254101.4; NR_103871.2; NM_005399.5; NR_103870.2	n.640-9T>C; c.742-9T>C; n.519-9T>C			Uncertain Significance				< 10
1	148252043	148252043	q21.2	C	T	SNV	Exonic	NBPF26	NM_001351372.1	c.3843G>A	p.P1281P	synonymous	Likely Benign				< 10	374336518	0.223
1	148252049	148252049	q21.2	A	C	SNV	Exonic	NBPF26	NM_001351372.1	c.3837G>T *	p.S1279S	synonymous	Likely Benign				< 10	201353547	0.441
1	148342478	148342478	q21.2	A	C	SNV	Exonic	NBPF26	NM_001351372.1	c.558T>G	p.S186S	synonymous	Likely Benign				< 10	781858141	0.019
1	149882415	149882415	q21.2	G	A	SNV	Exonic	SV2A	NM_001328674.2; NM_001328675.2; ENST00000369145.1; NM_014849.5; ENST00000369146.8	c.918C>T	p.Y306Y	synonymous	Likely Benign				< 10	137912594	0.034	RCV000948558.1
1	149899643	149899643	q21.2	G	C	SNV	Exonic	SF3B4	NM_005850.5; ENST00000271628.9	c.9C>G	p.A3A	synonymous	Uncertain Significance				14	150625746	0.026	RCV000907813.1
1	149905827	149905827	q21.2	C	A	SNV	Exonic	MTMR11	NM_181873.3; ENST00000439741.4; NM_001145862.2; ENST00000369140.7	c.476G>T; c.692G>T	p.R159L; p.R231L	missense	Uncertain Significance	Tolerated	0.26	Benign	23.9	114172447	0.015
1	150241160	150241160	q21.2	G	A	SNV	Exonic; ncRNA	APH1A	NR_045034.2; NM_001243771.2; NR_045035.2; NM_001077628.3; NR_045033.2; NM_001243772.2; ENST00000414276.6; NM_016022.4; ENST00000369109.8; ENST00000360244.8	n.257C>T; c.51C>T	p.A17A	synonymous	Uncertain Significance				14.88	112321698	0.003
1	150479486	150479486	q21.3	G	A	SNV	Promoter; Exonic; ncRNA	ECM1; TARS2	ENST00000438568.6; ENST00000369047.9; ENST00000369049.8; ENST00000369054.6; NM_001271895.2; ENST00000346569.6; ENST00000369064.8; NM_004425.4; NM_025150.5; NM_022664.3; ENST00000606933.5; NM_001271896.2; NR_073514.2; NM_001202858.2; NR_073513.2	c.-1200G>A; n.1534G>A; c.2103G>A; c.1713G>A; c.1857G>A; n.2010G>A; c.1278G>A	p.Q619Q; p.Q426Q; p.Q571Q; p.Q701Q	synonymous	Likely Benign				< 10	114661327	0.134	RCV000439824.1; RCV000955776.1
1	150482405	150482405	q21.3	C	T	SNV	Exonic	ECM1	ENST00000369047.9; ENST00000369049.8; ENST00000346569.6; NM_004425.4; NM_022664.3; NM_001202858.2	c.312C>T; c.231C>T	p.P77P; p.P104P	synonymous	Likely Benign				< 10	115614690	0.255	RCV000952301.2
1	150529181	150529181	q21.3	T	A	SNV	Exonic	ADAMTSL4	NM_025008.5; ENST00000369038.6; NM_019032.6; NM_001288607.2; ENST00000674058.1; NM_001378596.1; ENST00000674043.1; NM_001288608.2	c.1661T>A; c.1730T>A	p.V577D; p.V554D	missense	Uncertain Significance	Damaging	0.01	Possibly Damaging	20.6	146557547	0.01
1	150531580	150531580	q21.3	G	A	SNV	Exonic	ADAMTSL4	ENST00000369038.6; NM_019032.6; NM_001288607.2; ENST00000674058.1; NM_001378596.1; ENST00000674043.1; NM_001288608.2	c.2702G>A; c.2585G>A; c.2771G>A	p.R901H; p.R862H; p.R924H	missense	Uncertain Significance	Damaging	0.03	Probably Damaging	27.8	146323215	0.016
1	150531882	150531882	q21.3	C	G	SNV	Exonic	ADAMTSL4	ENST00000369038.6; NM_019032.6; NM_001288607.2; ENST00000674058.1; NM_001378596.1; ENST00000674043.1; NM_001288608.2	c.2883C>G; c.2766C>G; c.2952C>G	p.A984A; p.A922A; p.A961A	synonymous	Likely Benign				11.98	148110558	0.074	RCV000971253.2; RCV000291780.2
1	150532262	150532262	q21.3	C	T	SNV	Exonic	ADAMTSL4	ENST00000369038.6; NM_019032.6; NM_001288607.2; ENST00000674058.1; NM_001378596.1; ENST00000674043.1; NM_001288608.2	c.2969C>T; c.3038C>T; c.2852C>T	p.T990M; p.T1013M; p.T951M	missense	Uncertain Significance	Tolerated	0.23	Benign	10.1	139784416	0.096	RCV000730377.1; RCV000963770.2; RCV001099268.1
1	150956844	150956844	q21.3	G	A	SNV	Exonic	ANXA9	NM_003568.3; ENST00000368947.9	c.355G>A	p.A119T	missense	Uncertain Significance	Damaging	0.04	Possibly Damaging	24.2	16832602	0.155
1	150970196	150970196	q21.3	G	A	SNV	Exonic	MINDY1	NM_001376664.1; NM_001163259.2; NM_018379.5; ENST00000312210.9; NM_001376671.1; NM_001376669.1; NM_001040217.3; ENST00000361936.9; NM_001163258.3; ENST00000361738.10; NM_001376668.1; NM_001376670.1; NM_001163260.2; NM_001319998.2; NM_001376672.1; NM_001376667.1; NM_001376665.1; ENST00000493834.2; NM_001376673.1; ENST00000622754.4; NM_001376666.1; NM_001376674.1	c.807C>T; c.948C>T; c.1206C>T; c.708C>T; c.1377C>T; c.1209C>T; c.1047C>T; c.1236C>T; c.1074C>T; c.1233C>T; c.738C>T; c.735C>T	p.T316T; p.T349T; p.T459T; p.T403T; p.T358T; p.T402T; p.T412T; p.T269T; p.T236T; p.T411T; p.T246T; p.T245T	synonymous	Likely Benign				< 10	116412969	0.229
1	151104784	151104784	q21.3	A		Deletion	Exonic; 3'UTR	SEMA6C	NM_001178062.3; NM_001178061.3; ENST00000621728.4; NM_030913.6; ENST00000368913.7	c.*176delT; c.1503delT	p.V502fs*15	frameshift	Uncertain Significance				15.59		0.108
1	151105788	151105788	q21.3	G	A	SNV	Exonic; Intronic	SEMA6C	NM_001178062.3; NM_001178061.3; ENST00000621728.4; NM_030913.6; ENST00000368913.7	c.2061C>T; c.1965C>T; c.1118-619C>T; c.1941C>T	p.A655A; p.A647A; p.A687A	synonymous	Uncertain Significance				11.92	192696853	0.057
1	151131207	151131207	q21.3	C	T	SNV	Intronic; Exonic	TNFAIP8L2-SCNM1; TNFAIP8L2	ENST00000368910.4; NM_024575.5; NM_001204848.2; NR_144937.2	c.-55+2009C>T; n.74+2009C>T; c.34C>T	p.Q12*	stop gain	Uncertain Significance				36	1219534412	0.001
1	151143003	151143003	q21.3	T	C	SNV	Exonic	TMOD4	NM_013353.3; ENST00000295314.9	c.1007A>G	p.N336S	missense	Uncertain Significance	Tolerated	0.41	Benign	22.3	11800088	0.263
1	151212480	151212480	q21.3	G	A	SNV	Exonic	PIP5K1A	ENST00000368888.9; NM_001135637.2; NM_003557.3; NM_001135638.2; ENST00000368890.8; ENST00000441902.6; NM_001135636.2; NM_001330689.2	c.1208G>A; c.1289G>A; c.1292G>A; c.1328G>A	p.R403H; p.R443H; p.R431H; p.R430H	missense	Uncertain Significance	Tolerated	0.08	Benign	22.9	368324834	0.004
1	151288896	151288896	q21.3	G	C	SNV	Exonic; Intronic	PI4KB	NM_001198774.2; ENST00000368873.5; NM_001369624.1; NM_001198773.3; NM_001369628.1; NM_001369623.2; ENST00000529142.5; NM_001330721.2; NM_001369629.2; ENST00000368874.8; NM_001369626.1; NM_001198775.3; NM_002651.4; NM_001369625.1	c.-42-8619C>G; c.98C>G; c.62C>G	p.P33R; p.P21R	missense	Uncertain Significance	Tolerated	0.43		15.27	138899197	0.064
1	151315613	151315613	q21.3	G	A	SNV	Exonic	RFX5	NM_001379418.1; NM_001379420.1; NM_001379413.1; NM_001025603.2; NM_001379419.1; ENST00000452671.7; NM_001379414.1; NM_000449.4; NM_001379416.1; NM_001379415.1; NM_001379417.1; ENST00000290524.8; NM_001379412.1	c.900C>T; c.780C>T	p.L260L; p.L300L	synonymous	Likely Benign				< 10	2233853	0.258	RCV000531047.6	1013642
1	151345119	151345119	q21.3	C	T	SNV	5'UTR	SELENBP1	NM_003944.4; ENST00000447402.7; NM_001258288.2; ENST00000426705.6; NM_001258289.2; ENST00000368868.10	c.-85G>A; c.-2G>A			Uncertain Significance				18.5	115507791	0.13
1	151491318	151491318	q21.3	T	G	SNV	Exonic	CGN	NM_020770.3; ENST00000271636.12	c.323T>G	p.V108G	missense	Uncertain Significance	Tolerated	0.53		16.32	142903144	0.098
1	151499539	151499539	q21.3	C	T	SNV	Exonic	CGN	NM_020770.3; ENST00000271636.12	c.1852C>T	p.R618*	stop gain	Uncertain Significance				39	140334393	0.011
1	151501908	151501908	q21.3	G	A	SNV	Promoter; Exonic	SNORA44; CGN	ENST00000517031.1; NM_020770.3; ENST00000271636.12	c.1979G>A; n.-1494C>T	p.R660Q	missense	Uncertain Significance	Tolerated	0.72		20.8	116788396	0.167
1	151507531	151507531	q21.3	G	A	SNV	Exonic	CGN	NM_020770.3; ENST00000271636.12	c.2918G>A	p.R973Q	missense	Likely Benign	Tolerated	0.39		25.6	79234959	0.176	RCV000955781.1
1	151641072	151641072	q21.3	A	G	SNV	Exonic	SNX27	ENST00000642376.1; NM_001330723.2; ENST00000368843.8; NM_030918.6	c.1110A>G; c.747A>G	p.L249L; p.L370L	synonymous	Uncertain Significance				11.76	760132169	0
1	151655837	151655837	q21.3	C	T	SNV	Exonic	SNX27	ENST00000368843.8; ENST00000642376.1; NM_001330723.2; NM_030918.6	c.792C>T; c.1155C>T	p.V385V; p.V264V	synonymous	Likely Benign				< 10	115166911	0.203	RCV000533262.5
1	151655838	151655838	q21.3	G	C	SNV	Exonic	SNX27	ENST00000368843.8; ENST00000642376.1; NM_001330723.2; NM_030918.6	c.1156G>C; c.793G>C	p.D386H; p.D265H	missense	Uncertain Significance	Damaging	0.04	Probably Damaging	28.4	138859961	0.165	RCV000546028.5
1	151678722	151678723	q21.3		TGCTGCTGC	Insertion	Exonic	CELF3	NM_001172648.4; NM_007185.7; NM_001172649.4; NM_001291107.2; ENST00000290585.8; ENST00000290583.9; NM_001291106.2	c.954_962dupGCAGCAGCA; c.1095_1103dupGCAGCAGCA; c.1092_1100dupGCAGCAGCA; c.945_953dupGCAGCAGCA	p.Q371_Q373dup; p.Q324_Q326dup; p.Q321_Q323dup; p.Q370_Q372dup	in-frame	Likely Benign				17.07		0.311
1	151688452	151688452	q21.3	C	T	SNV	Exonic; 5'UTR; Intronic	RIIAD1; CELF3	NM_001172648.4; NM_007185.7; ENST00000326413.7; NM_001172649.4; NM_001291107.2; ENST00000290585.8; ENST00000290583.9; NM_001291106.2	c.21+1447C>T; c.-354G>A; c.45G>A	p.P15P	synonymous	Uncertain Significance				12.93	149099749	0.036
1	151732552	151732552	q21.3	T	C	SNV	Exonic; ncRNA	MRPL9	NM_031420.4; NR_125331.2; ENST00000368830.8; NM_001300733.2; ENST00000368829.3	c.676A>G; c.778A>G; n.835A>G	p.M260V; p.M226V	missense	Likely Benign	Tolerated	0.76	Benign	< 10	141949185	0.163
1	151739327	151739327	q21.3	A	G	SNV	Intronic; Exonic	OAZ3	NM_016178.2; NM_001134939.1; NM_001301371.1	c.130A>G; c.72-312A>G; c.33-312A>G	p.T44A	missense	Uncertain Significance				17.05	146514551	0.004
1	151739333	151739333	q21.3	C	G	SNV	Intronic; Exonic	OAZ3	NM_016178.2; NM_001134939.1; NM_001301371.1	c.72-306C>G; c.33-306C>G; c.136C>G	p.R46G	missense	Uncertain Significance				17.05
1	151747951	151747951	q21.3	G	A	SNV	Exonic	TDRKH	NM_001083963.1; NM_001083964.1; ENST00000368823.5; ENST00000368827.10; ENST00000368824.8; NM_006862.4; ENST00000458431.6; ENST00000368825.7; NM_001083965.2	c.1216C>T; c.1351C>T; c.1339C>T	p.L406L; p.L447L; p.L451L	synonymous	Uncertain Significance				10.1	182399786	0.004
1	151774318	151774318	q21.3	A	T	SNV	Exonic	LINGO4	NM_001004432.4; ENST00000368820.4	c.863T>A	p.I288N	missense	Uncertain Significance	Damaging	0	Probably Damaging	27.2	140797009	0.021
1	151774950	151774950	q21.3	C	T	SNV	Exonic	LINGO4	NM_001004432.4; ENST00000368820.4	c.231G>A	p.Q77Q	synonymous	Likely Benign				< 10	139571478	0.161
1	151810897	151810897	q21.3	G	A	SNV	ncRNA; Exonic	C2CD4D; C2CD4D-AS1	NR_152846.1; ENST00000454109.1; NM_001136003.2; NR_024237.2	n.145G>A; c.569C>T	p.P190L	missense	Uncertain Significance	Tolerated	0.1	Benign	22.6	559968861	0.083
1	151958617	151958617	q21.3	G	A	SNV	Exonic	S100A10	ENST00000368811.8; NM_002966.3	c.90C>T	p.D30D	synonymous	Uncertain Significance				12.01	76349723	0.193
1	152059461	152059461	q21.3	G	T	SNV	Exonic	TCHHL1	NM_001008536.2; ENST00000368806.2	c.697C>A	p.Q233K	missense	Likely Benign	Tolerated	0.77	Benign	< 10	74129507	0.246
1	152059552	152059552	q21.3	A	G	SNV	Exonic	TCHHL1	NM_001008536.2; ENST00000368806.2	c.606T>C	p.N202N	synonymous	Likely Benign				< 10	115754547	0.122
1	152081064	152081064	q21.3	C	T	SNV	Exonic	TCHH	NM_007113.4	c.4629G>A	p.Q1543Q	synonymous	Uncertain Significance				< 10
1	152083636	152083636	q21.3	G	C	SNV	Exonic	TCHH	NM_007113.4	c.2057C>G	p.A686G	missense	Likely Benign	Tolerated	0.17	Possibly Damaging	21.8	114824000	0.146	RCV000964823.1
1	152083668	152083668	q21.3	C	T	SNV	Exonic	TCHH	NM_007113.4	c.2025G>A	p.E675E	synonymous	Likely Benign				< 10	185807166	0.119
1	152083887	152083887	q21.3	C	A	SNV	Exonic	TCHH	NM_007113.4	c.1806G>T	p.L602L	synonymous	Likely Benign				< 10	115769840	0.119
1	152084403	152084420	q21.3	CTCCTGCTCGCGCCTCAG		Deletion	Exonic	TCHH	NM_007113.4	c.1273_1290delCTGAGGCGCGAGCAGGAG	p.L425_E430del	in-frame	Uncertain Significance					1221582526
1	152127663	152127663	q21.3	A	G	SNV	Exonic	RPTN	NM_001122965.1; ENST00000316073.3	c.1912T>C	p.S638P	missense	Likely Benign	Tolerated	0.25	Benign	< 10	77415490	0.12
1	152187534	152187534	q21.3	C	T	SNV	Exonic	HRNR	ENST00000368801.4; NM_001009931.3	c.6571G>A	p.G2191S	missense	Uncertain Significance	Tolerated	0.75	Benign	< 10	140253785	0.063
1	152187535	152187535	q21.3	G	A	SNV	Exonic	HRNR	ENST00000368801.4; NM_001009931.3	c.6570C>T	p.S2190S	synonymous	Likely Benign				< 10	149941277	0.162
1	152191365	152191365	q21.3	C	T	SNV	Exonic	HRNR	ENST00000368801.4; NM_001009931.3	c.2740G>A	p.G914S	missense	Likely Benign	Tolerated	0.99	Benign	< 10	150329486	0.178
1	152191698	152191698	q21.3	T	C	SNV	Exonic	HRNR	ENST00000368801.4; NM_001009931.3	c.2407A>G	p.S803G	missense	Likely Benign	Tolerated	0.51	Benign	< 10	111789738	0.216
1	152191778	152191778	q21.3	G	T	SNV	Exonic	HRNR	ENST00000368801.4; NM_001009931.3	c.2327C>A	p.P776H	missense	Uncertain Significance	Tolerated	0.1	Benign	13.74	145603577	0.141
1	152275482	152275482	q21.3	A	G	SNV	Exonic	FLG	NM_002016.2; ENST00000368799.2	c.11880T>C	p.S3960S	synonymous	Likely Benign				< 10	144643375	0.05
1	152275568	152275568	q21.3	T	C	SNV	Exonic	FLG	NM_002016.2; ENST00000368799.2	c.11794A>G	p.S3932G	missense	Uncertain Significance			Benign	< 10	140369299	0.007
1	152275899	152275899	q21.3	G	A	SNV	Exonic	FLG	NM_002016.2; ENST00000368799.2	c.11463C>T	p.D3821D	synonymous	Likely Benign				< 10	149624484	0.146
1	152276437	152276437	q21.3	A	G	SNV	Exonic	FLG	NM_002016.2; ENST00000368799.2	c.10925T>C	p.I3642T	missense	Likely Benign			Benign	< 10	150010190	0.274	RCV001572807.2
1	152276692	152276692	q21.3	C	G	SNV	Exonic	FLG	NM_002016.2; ENST00000368799.2	c.10670G>C	p.G3557A	missense	Likely Benign			Possibly Damaging	< 10	142157664	0.19	RCV001549688.1
1	152276799	152276799	q21.3	G	A	SNV	Exonic	FLG	NM_002016.2; ENST00000368799.2	c.10563C>T	p.S3521S	synonymous	Likely Benign				< 10	138567818	0.037
1	152276858	152276858	q21.3	A	G	SNV	Exonic	FLG	NM_002016.2; ENST00000368799.2	c.10504T>C	p.S3502P	missense	Uncertain Significance			Probably Damaging	12.25	150047484	0.008
1	152277049	152277049	q21.3	G	A	SNV	Exonic	FLG	NM_002016.2; ENST00000368799.2	c.10313C>T	p.P3438L	missense	Uncertain Significance			Benign	< 10	371915215	0.003						4022405	0.19
1	152277391	152277391	q21.3	G	A	SNV	Exonic	FLG	NM_002016.2; ENST00000368799.2	c.9971C>T	p.S3324L	missense	Uncertain Significance			Probably Damaging	21.8	143319310	0.056
1	152278670	152278670	q21.3	C	G	SNV	Exonic	FLG	NM_002016.2; ENST00000368799.2	c.8692G>C	p.E2898Q	missense	Uncertain Significance			Possibly Damaging	15.68	150427834	0.284	RCV001577430.1	192947
1	152278956	152278956	q21.3	G	A	SNV	Exonic	FLG	NM_002016.2; ENST00000368799.2	c.8406C>T	p.H2802H	synonymous	Likely Benign				< 10	137870179	0.178
1	152278992	152278992	q21.3	C	T	SNV	Exonic	FLG	NM_002016.2; ENST00000368799.2	c.8370G>A	p.P2790P	synonymous	Likely Benign				< 10	144533611	0.252
1	152279896	152279896	q21.3	C	A	SNV	Exonic	FLG	NM_002016.2; ENST00000368799.2	c.7466G>T	p.G2489V	missense	Uncertain Significance			Benign	13.23	138270516	0.05
1	152280492	152280492	q21.3	G	A	SNV	Exonic	FLG	NM_002016.2; ENST00000368799.2	c.6870C>T	p.A2290A	synonymous	Likely Benign				< 10	111307972	0.013		222752
1	152281373	152281373	q21.3	C	T	SNV	Exonic	FLG	NM_002016.2; ENST00000368799.2	c.5989G>A	p.A1997T	missense	Uncertain Significance			Benign	< 10	147125842	0.036
1	152282398	152282398	q21.3	G	T	SNV	Exonic	FLG	NM_002016.2; ENST00000368799.2	c.4964C>A	p.T1655N	missense	Uncertain Significance			Benign	11.42	768667496	0.001
1	152282882	152282882	q21.3	C	A	SNV	Exonic	FLG	NM_002016.2; ENST00000368799.2	c.4480G>T	p.G1494W	missense	Uncertain Significance			Possibly Damaging	16.11	147239265	0.029
1	152283426	152283426	q21.3	A	T	SNV	Exonic	FLG	NM_002016.2; ENST00000368799.2	c.3936T>A	p.H1312Q	missense	Likely Benign			Benign	< 10	115324644	0.196	RCV001546587.1
1	152283430	152283430	q21.3	A	G	SNV	Exonic	FLG	NM_002016.2; ENST00000368799.2	c.3932T>C	p.F1311S	missense	Uncertain Significance			Benign	< 10	73005481	0.046
1	152283472	152283472	q21.3	G	T	SNV	Exonic	FLG	NM_002016.2; ENST00000368799.2	c.3890C>A	p.S1297Y	missense	Uncertain Significance			Probably Damaging	16.13	147367657	0.05
1	152283530	152283530	q21.3	T	C	SNV	Exonic	FLG	NM_002016.2; ENST00000368799.2	c.3832A>G	p.R1278G	missense	Uncertain Significance			Benign	< 10	111626670	0.12
1	152283533	152283533	q21.3	C	G	SNV	Exonic	FLG	NM_002016.2; ENST00000368799.2	c.3829G>C	p.E1277Q	missense	Uncertain Significance			Benign	< 10	139456266	0.101
1	152284576	152284576	q21.3	C	A	SNV	Promoter; Exonic	FLG; FLG-AS1	NR_103778.1; NM_002016.2; ENST00000368799.2	n.-1359C>A; c.2786G>T	p.G929V	missense	Uncertain Significance			Possibly Damaging	15.94	143382793	0.206	RCV001573302.1
1	152285021	152285021	q21.3	C	G	SNV	Promoter; Exonic	FLG; FLG-AS1	NR_103778.1; NM_002016.2; ENST00000368799.2	n.-914C>G; c.2341G>C	p.D781H	missense	Uncertain Significance			Benign	11.44	148739675	0.076
1	152285730	152285730	q21.3	G	A	SNV	Promoter; Exonic	FLG; FLG-AS1	NR_103778.1; NM_002016.2; ENST00000368799.2	c.1632C>T; n.-205G>A	p.S544S	synonymous	Uncertain Significance				< 10	137997325	0.074
1	152285865	152285865	q21.3	C	G	SNV	Promoter; Exonic	FLG; FLG-AS1	NR_103778.1; NM_002016.2; ENST00000368799.2	n.-70C>G; c.1497G>C	p.Q499H	missense	Uncertain Significance			Benign	< 10	376837064	0.001
1	152286105	152286105	q21.3	A	T	SNV	ncRNA; Exonic	FLG; FLG-AS1	NR_103778.1; NM_002016.2; ENST00000368799.2	c.1257T>A; n.171A>T	p.G419G	synonymous	Likely Benign				< 10	146408041	0.081
1	152324043	152324043	q21.3	A	G	SNV	Intronic; Exonic	FLG2; FLG-AS1	NM_001014342.3; NR_103778.1; NR_103779.1	n.1406+10357A>G; n.151+10357A>G; c.6219T>C	p.H2073H	synonymous	Likely Benign				< 10	138816378	0.003
1	152325054	152325054	q21.3	C	A	SNV	Intronic; Exonic	FLG2; FLG-AS1	NM_001014342.3; NR_103778.1; NR_103779.1	n.1406+11368C>A; c.5208G>T; n.151+11368C>A	p.G1736G	synonymous	Likely Benign				< 10	12067755	0.316
1	152325368	152325368	q21.3	G	A	SNV	Intronic; Exonic	FLG2; FLG-AS1	NM_001014342.3; NR_103778.1; NR_103779.1	n.152-11095G>A; n.1407-11095G>A; c.4894C>T	p.H1632Y	missense	Uncertain Significance	Tolerated	0.25	Benign	11.09	150364809	0.026
1	152327811	152327811	q21.3	G	A	SNV	Intronic; Exonic	FLG2; FLG-AS1	NM_001014342.3; NR_103778.1; NR_103779.1	n.1407-8652G>A; c.2451C>T; n.152-8652G>A	p.S817S	synonymous	Likely Benign				< 10	201122691	0.006						244549	0.89
1	152328096	152328096	q21.3	G	A	SNV	Intronic; Exonic	FLG2; FLG-AS1	NM_001014342.3; NR_103778.1; NR_103779.1	n.1407-8367G>A; c.2166C>T; n.152-8367G>A	p.H722H	synonymous	Likely Benign				< 10	751358533	0.004						2206998	1.27
1	152329315	152329315	q21.3	C	T	SNV	Intronic; Exonic	FLG2; FLG-AS1	NM_001014342.3; NR_103778.1; NR_103779.1	n.152-7148C>T; n.1407-7148C>T; c.947G>A	p.G316D	missense	Uncertain Significance	Tolerated	0.18	Possibly Damaging	22.5	147213340	0.002
1	152329534	152329534	q21.3	C	T	SNV	Intronic; Exonic	FLG2; FLG-AS1	NM_001014342.3; NR_103778.1; NR_103779.1	c.728G>A; n.152-6929C>T; n.1407-6929C>T	p.G243E	missense	Uncertain Significance	Tolerated	0.09	Benign	10.63	139597182	0.008
1	152382312	152382312	q21.3	C	T	SNV	Exonic	CRNN	ENST00000271835.3; NM_016190.3	c.1246G>A	p.E416K	missense	Uncertain Significance	Tolerated	0.53	Benign	15.97	114727464	0.03
1	152382444	152382444	q21.3	T	C	SNV	Exonic	CRNN	ENST00000271835.3; NM_016190.3	c.1114A>G	p.R372G	missense	Likely Benign	Tolerated	0.51	Benign	< 10	76914091	0.185
1	152383131	152383131	q21.3	C	T	SNV	Exonic	CRNN	ENST00000271835.3; NM_016190.3	c.427G>A	p.G143S	missense	Uncertain Significance	Tolerated	0.26	Benign	< 10	138272209	0.001
1	152484197	152484197	q21.3	G	A	SNV	Exonic	LCE5A	NM_178438.5	c.187G>A	p.E63K	missense	Uncertain Significance	Tolerated	0.79	Benign	16.16	144519020	0.202
1	152484260	152484260	q21.3	A	T	SNV	Exonic	LCE5A	NM_178438.5	c.250A>T	p.S84C	missense	Uncertain Significance	Tolerated	0.08	Benign	< 10	56169785	0.611
1	152552311	152552311	q21.3	G	A	SNV	Exonic	LCE3D	ENST00000368787.4; NM_032563.2	c.102C>T	p.S34S	synonymous	Likely Benign				< 10	149516289	0.199
1	152659554	152659554	q21.3	C	G	SNV	Exonic	LCE2B	NM_014357.5; ENST00000368780.4	c.235C>G	p.R79G	missense	Uncertain Significance	Tolerated	0.22	Benign	< 10
1	152681627	152681627	q21.3	C	T	SNV	Exonic	LCE4A	NM_001387222.1; NM_178356.3; ENST00000368777.1	c.76C>T	p.P26S	missense	Uncertain Significance	Tolerated	0.23	Benign	< 10	760448181	0						9904229	14.29
1	152692173	152692173	q21.3	A	G	SNV	Exonic	C1orf68	NM_001024679.3; ENST00000368775.3	c.176A>G	p.Q59R	missense	Likely Benign	Tolerated	0.48	Benign	< 10	140677170	0.204
1	152759915	152759915	q21.3	G	A	SNV	Exonic	LCE1E	NM_178353.2; ENST00000368770.4	c.140G>A	p.S47N	missense	Uncertain Significance	Tolerated	0.08	Benign	22.4	138127871	0.137
1	152759989	152759989	q21.3	G	A	SNV	Exonic	LCE1E	NM_178353.2; ENST00000368770.4	c.214G>A	p.G72R	missense	Uncertain Significance	Damaging	0.05	Probably Damaging	22.2	148840667	0.503
1	152770305	152770305	q21.3	C	T	SNV	Exonic	LCE1D	NM_178352.3	c.35C>T	p.P12L	missense	Uncertain Significance	Tolerated	0.06	Benign	19.51	145909571	0.003
1	152770403	152770403	q21.3	G	A	SNV	Exonic	LCE1D	NM_178352.3	c.133G>A	p.G45R	missense	Uncertain Significance	Tolerated	0.09	Possibly Damaging	21.5	150172690	0.227
1	152777755	152777755	q21.3	C	A	SNV	Exonic	LCE1C	ENST00000607093.1; NM_001276331.2; NM_178351.4	c.110G>T; c.200G>T	p.C67F; p.C37F	missense	Likely Benign	Damaging	0	Possibly Damaging	25.2	146157684	0.136	RCV000955248.1
1	152882752	152882752	q21.3	A	G	SNV	Exonic	IVL	ENST00000368764.4; NM_005547.4	c.479A>G	p.E160G	missense	Uncertain Significance	Damaging	0.01	Benign	11.71	1201202885	0.001
1	152883321	152883321	q21.3	G	A	SNV	Exonic	IVL	ENST00000368764.4; NM_005547.4	c.1048G>A	p.E350K	missense	Uncertain Significance	Tolerated	0.14	Benign	< 10	373783926	0.011
1	152883929	152883929	q21.3	C	A	SNV	Exonic	IVL	ENST00000368764.4; NM_005547.4	c.1656C>A	p.V552V	synonymous	Likely Benign				< 10
1	152957887	152957887	q21.3	G	T	SNV	Exonic	SPRR1A	ENST00000368762.1; NM_005987.4; NM_001199828.2	c.181G>T	p.V61F	missense	Uncertain Significance	Tolerated	0.74	Probably Damaging	21.1	1611764	0.148
1	152975874	152975874	q21.3	T	C	SNV	Exonic	SPRR3	NM_005416.3; ENST00000295367.5; NM_001097589.2	c.378T>C	p.P126P	synonymous	Likely Benign				< 10	28989171	0.011
1	153233488	153233489	q21.3		GGCGGTGGCGGT	Insertion	Exonic	LORICRIN	NM_000427.3; ENST00000368742.4	c.69_80dupTGGCGGTGGCGG	p.G25_G28dup	in-frame	Uncertain Significance				16.48		0.022
1	153234166	153234166	q21.3	C	T	SNV	Exonic	LORICRIN	NM_000427.3; ENST00000368742.4	c.741C>T	p.G247G	synonymous	Uncertain Significance				< 10
1	153271685	153271685	q21.3	C	T	SNV	Exonic	PGLYRP3	ENST00000290722.1; NM_052891.3	c.751G>A	p.G251S	missense	Uncertain Significance	Tolerated	0.73	Benign	14.46	118113194	0.375
1	153276383	153276385	q21.3	AGA		Deletion	Exonic	PGLYRP3	ENST00000290722.1; NM_052891.3	c.477_479delTCT	p.L160del	in-frame	Uncertain Significance				17.9	562987055	0.035
1	153317667	153317669	q21.3	TGT		Deletion	Exonic	PGLYRP4	NM_020393.4; ENST00000359650.10	c.329_331delACA	p.N110del	in-frame	Uncertain Significance				11.77	568298867	0.044
1	153346426	153346426	q21.3	A	G	SNV	Exonic	S100A12	NM_005621.2; ENST00000368737.5	c.156T>C	p.A52A	synonymous	Likely Benign				< 10	114522590	0.025
1	153391757	153391757	q21.3	C	T	SNV	Intronic; Exonic	S100A7A; S100A8	ENST00000368729.9; ENST00000329256.2; NM_176823.4; NM_001319198.2	c.278C>T; c.2+3237G>A	p.A93V	missense	Likely Benign	Tolerated	0.2	Benign	< 10	112431881	0.133
1	153516337	153516337	q21.3	G	A	SNV	Promoter; Exonic	S100A4; LOC101928034	ENST00000354332.8; NM_002961.3; ENST00000368715.5; NM_019554.3; ENST00000368716.9; NR_125947.1	n.-1881G>A; c.204C>T	p.N68N	synonymous	Likely Benign				< 10	111468775	0.027	RCV000911639.1
1	153535932	153535932	q21.3	G	C	SNV	Exonic; Intronic	S100A2	ENST00000368708.9; ENST00000497140.5; ENST00000368707.5; NM_005978.4; ENST00000487430.7; NM_001366407.1; NM_001366406.1	c.144+278C>G; c.225C>G; c.42+278C>G	p.S75R	missense	Uncertain Significance				13.64	529087465	0.037
1	153631324	153631324	q21.3	C	A	SNV	ncRNA; Exonic	SNAPIN	ENST00000368685.6; NR_052020.1; NM_012437.6; NR_052019.1	n.195C>A; c.105C>A	p.P35P	synonymous	Likely Benign				< 10	16835479	0.226
1	153636865	153636865	q21.3	G	A	SNV	Intronic	ILF2	ENST00000361891.9; NM_001267809.2; ENST00000615950.4; NM_004515.4	c.542+7C>T; c.656+7C>T			Likely Benign				< 10	138777641	0.405
1	153641010	153641010	q21.3	G	T	SNV	Exonic	ILF2	ENST00000361891.9; NM_001267809.2; ENST00000368681.1; ENST00000615950.4; NM_004515.4	c.18C>A; c.132C>A	p.V44V; p.V6V	synonymous	Uncertain Significance				11.16	1439611021	0
1	153652013	153652013	q21.3	G	C	SNV	Exonic	NPR1	ENST00000368680.4; NM_000906.4	c.429G>C	p.A143A	synonymous	Likely Benign				12.83	149697676	0.271
1	153652129	153652129	q21.3	C	T	SNV	Exonic	NPR1	ENST00000368680.4; NM_000906.4	c.545C>T	p.A182V	missense	Uncertain Significance	Tolerated	0.21	Benign	22.9	56019647	0.253
1	153736379	153736379	q21.3	T	C	SNV	Intronic	INTS3	ENST00000318967.7; NM_001324475.2; NM_023015.5; ENST00000435409.6; ENST00000512605.4	c.1821+17T>C; c.1203+17T>C			Uncertain Significance				10.91	111753315	0.058
1	153744371	153744371	q21.3	C	T	SNV	Exonic	INTS3	ENST00000318967.7; NM_001324475.2; NM_023015.5; ENST00000435409.6; ENST00000512605.4	c.2652C>T; c.2034C>T	p.D678D; p.D884D	synonymous	Uncertain Significance				< 10	111757548	0.091
1	153747658	153747658	q21.3	C	A	SNV	Promoter; Exonic	SLC27A3	NM_001317929.4; NM_024330.4; ENST00000271857.6; ENST00000624995.4; NR_145826.3	c.-316C>A; c.69C>A; n.-225C>A	p.R23R	synonymous	Likely Benign				< 10	185057219	0.117
1	153748225	153748225	q21.3	C	T	SNV	Exonic; ncRNA	SLC27A3	NM_001317929.4; NM_024330.4; ENST00000271857.6; ENST00000624995.4; NR_145826.3	c.252C>T; c.636C>T; n.343C>T	p.L84L; p.L212L	synonymous	Uncertain Significance				13.16	576461726	0.001
1	153790569	153790569	q21.3	G	C	SNV	Exonic	GATAD2B	NM_020699.4; ENST00000368655.5	c.676C>G	p.P226A	missense	Likely Benign	Tolerated	1	Probably Damaging	22.9	115193744	0.181	RCV000429927.3; RCV000117123.2
1	153907287	153907288	q21.3		CTG	Insertion	Exonic	DENND4B	NM_001367466.1; ENST00000361217.9; NM_014856.3	c.2761_2763dupCAG; c.2728_2730dupCAG	p.Q921dup; p.Q910dup	in-frame	Uncertain Significance				15.8								9819137	50
1	153914557	153914557	q21.3	C	T	SNV	Exonic	DENND4B	NM_001367466.1; ENST00000361217.9; NM_014856.3	c.876G>A; c.843G>A	p.A292A; p.A281A	synonymous	Uncertain Significance				10.2	76818957	0.263
1	153941602	153941602	q21.3	G	A	SNV	Promoter; Exonic; Intronic	CREB3L4; SLC39A1	NM_001255980.2; ENST00000368600.7; ENST00000368607.8; ENST00000271889.8; NM_001255978.2; ENST00000368603.5; NM_014437.5; NR_045658.2; ENST00000368601.5; NM_130898.4; NM_001271960.2; ENST00000310483.10; NM_001255981.2; NM_001255979.2	c.371G>A; c.311G>A; n.442-208G>A; c.-1880C>T; c.-1182C>T	p.R104K; p.R124K	missense	Uncertain Significance	Tolerated	0.93	Benign	10.2	74369324	0.207
1	153947299	153947299	q21.3	A	C	SNV	Exonic	JTB	ENST00000356648.5; ENST00000368589.5; ENST00000271843.9; NM_006694.4	c.210T>G; c.297T>G	p.A70A; p.A99A	synonymous	Uncertain Significance				12.35	75680046	0.128
1	154018621	154018621	q21.3	T	C	SNV	Exonic	NUP210L	NM_207308.2; NM_001159484.1; ENST00000368553.5	c.3620A>G; c.419A>G	p.N1207S; p.N140S	missense	Uncertain Significance	Damaging	0.04	Benign	16.21	112933529	0.024
1	154127482	154127482	q21.3	G	A	SNV	Exonic	NUP210L	NM_207308.2; NM_001159484.1	c.39C>T	p.F13F	synonymous	Likely Benign				< 10	112790774	0.045
1	154131537	154131537	q21.3	C	T	SNV	Intronic	TPM3	NM_001278188.2; NM_001043353.2; NM_001278190.2; NM_001364680.2; NM_001349679.2; NM_001278191.2; NM_001278189.2; NM_001043351.2; ENST00000368533.8; ENST00000323144.12; NM_153649.4; NM_001043352.2; ENST00000330188.13; ENST00000328159.9; NM_001364681.2; ENST00000368531.6; NR_103461.2; NM_001364679.2	c.744-1340G>A; c.395-1340G>A; c.665-13G>A; c.602-1340G>A; c.467-1340G>A; c.665-1340G>A; c.776-1340G>A; c.776-13G>A; n.760-1340G>A			Uncertain Significance				14.84	372262294	0.012
1	154164403	154164403	q21.3	T	G	SNV	Exonic; ncRNA	TPM3	NM_001364682.1; NM_001364680.2; ENST00000368530.7; NM_152263.4; NR_103460.2; ENST00000651641.1; NM_001364681.2; NM_001364679.2	c.92A>C; n.174A>C	p.K31T	missense	Likely Benign	Damaging	0.02		23.9	62000429	0.182	RCV000549857.5; RCV001085350.2; RCV001100612.1; RCV000194376.4; RCV001098781.1
1	154207763	154207763	q21.3	C	G	SNV	Exonic	UBAP2L	NM_001375619.1; NM_001375631.1; NM_001375625.1; NM_001330730.1; NM_001127320.3; NM_001375626.1; NM_001375612.1; NM_001375627.1; ENST00000613315.4; NM_001287816.1; NM_001375629.1; NM_001375628.1; NM_001287815.1; ENST00000361546.6; NM_001375621.1; NM_001375614.1; NM_001375620.1; ENST00000343815.10; NM_001375622.1; NM_001375615.1; NM_014847.4; NM_001375623.1; NM_001375616.1; NM_001375618.1; NM_00137…	c.573C>G; c.519C>G; c.540C>G	p.G173G; p.G180G; p.G191G	synonymous	Uncertain Significance				13.08	148736933	0.005
1	154226365	154226365	q21.3	G	A	SNV	Intronic	UBAP2L	NM_001375619.1; NM_001375631.1; NM_001375625.1; NM_001330730.1; NM_001127320.3; NM_001375626.1; NM_001375612.1; NM_001375627.1; ENST00000613315.4; NM_001287816.1; NM_001375629.1; NM_001375628.1; NM_001287815.1; ENST00000361546.6; NM_001375621.1; NM_001375614.1; NM_001375620.1; ENST00000343815.10; NM_001375622.1; NM_014847.4; NM_001375615.1; NM_001375623.1; NM_001375616.1; NM_001375618.1; NM_00137…	c.1665-11G>A; c.1698-11G>A; c.1644-11G>A			Likely Benign				< 10	78271793	0.185
1	154401691	154401691	q21.3	G	C	SNV	Exonic	IL6R	NM_001382770.1; NM_181359.3; NM_001382769.1; ENST00000622330.4; NM_001382771.1; ENST00000344086.8; NM_001382772.1; NM_000565.4; NM_001382773.1; NM_001206866.2; NM_001382774.1; ENST00000368485.8	c.105G>C	p.L35L	synonymous	Likely Benign				< 10	762997891	0.019
1	154461665	154461665	q21.3	G	A	SNV	ncRNA; Exonic	SHE	NM_001010846.3; NR_135169.2; ENST00000304760.3	n.1272C>T; c.886C>T	p.P296S	missense	Uncertain Significance	Damaging	0.02	Benign	22.4	369258464	0.002
1	154493930	154493930	q21.3	T	C	SNV	Exonic	TDRD10	NM_182499.4; ENST00000368482.8; ENST00000368480.3; NM_001098475.2	c.344T>C	p.M115T	missense	Uncertain Significance			Benign	< 10	148620019	0.031
1	154522958	154522958	q21.3	G	A	SNV	Intronic	UBE2Q1	ENST00000292211.5; NM_017582.7	c.1238-13C>T			Uncertain Significance				< 10	59938388	0.099
1	154544534	154544534	q21.3	G	A	SNV	Exonic	CHRNB2	NM_000748.3; ENST00000368476.4	c.1235G>A	p.G412D	missense	Likely Benign	Tolerated	0.48	Benign	< 10	112585933	0.129	RCV001085886.2; RCV000232314.7; RCV000186980.6
1	154548222	154548222	q21.3	C	T	SNV	Intronic	CHRNB2	NM_000748.3; ENST00000368476.4	c.1339-16C>T			Likely Benign				< 10	117167810	0.015	RCV000423392.1
1	154569591	154569591	q21.3	C	T	SNV	Intronic	ADAR	ENST00000648231.2; NM_001193495.2; NM_001365048.1; NM_015840.4; ENST00000648311.1; NM_001365047.1; ENST00000649749.1; ENST00000368471.8; ENST00000649022.2; NM_001365046.1; ENST00000368474.9; NM_015841.4; NM_001025107.3; NM_001365049.1; ENST00000649724.1; NM_001111.5; ENST00000649042.1; NM_001365045.1	c.2106+8G>A; c.1194+8G>A; c.2079+8G>A			Likely Benign				< 10	376867928	0.049	RCV000338497.2; RCV000594198.4; RCV001081832.2
1	154573993	154573993	q21.3	G	A	SNV	Exonic	ADAR	NM_015840.4; NM_001193495.2; NM_001365048.1; ENST00000648231.2; ENST00000648311.1; NM_001365047.1; ENST00000649749.1; ENST00000368471.8; ENST00000649022.2; NM_001365046.1; ENST00000368474.9; NM_015841.4; NM_001025107.3; NM_001365049.1; ENST00000649724.1; NM_001111.5; ENST00000649042.1; NM_001365045.1	c.240C>T; c.1152C>T; c.1125C>T	p.T80T; p.T375T; p.T384T	synonymous	Likely Benign				< 10	145166589	0.018	RCV000551367.4
1	154842200	154842205	q21.3	GCTGCT		Deletion	Promoter; Exonic	KCNN3	NM_002249.6; NM_001365838.1; ENST00000271915.9; NM_001204087.2; ENST00000358505.2; NM_001365837.1	c.-1787_-1782delAGCAGC; c.236_241delAGCAGC	p.Q79_Q80del	in-frame	Uncertain Significance				16.65								424008	6.82
1	154842302	154842302	q21.3	G	A	SNV	Promoter; Exonic	KCNN3	NM_002249.6; NM_001365838.1; ENST00000271915.9; NM_001204087.2; ENST00000358505.2; NM_001365837.1	c.-1884C>T; c.139C>T	p.P47S	missense	Uncertain Significance	Tolerated	0.19		17.81	189948752	0.168
1	154920822	154920822	q21.3	G	A	SNV	Exonic; 5'UTR	PBXIP1	ENST00000368463.8; NM_001317735.2; NM_001317734.2; NM_020524.4; ENST00000368465.5	c.-36C>T; c.343C>T; c.430C>T	p.R144C; p.R115C	missense	Uncertain Significance	Damaging	0.03	Benign	15.29	139930056	0.119
1	154924307	154924307	q21.3	C	T	SNV	Exonic; Intronic	PBXIP1	ENST00000368463.8; NM_001317735.2; NM_001317734.2; NM_020524.4; ENST00000368465.5	c.142G>A; c.55G>A; c.-81-575G>A	p.D48N; p.D19N	missense	Uncertain Significance	Tolerated	0.64	Benign	14.31	148642218	0.159
1	154942610	154942610	q21.3	G	A	SNV	Exonic; 5'UTR	SHC1	NM_001130040.2; NM_001130041.2; NM_003029.5; ENST00000368453.8; NM_001202859.2; ENST00000368445.9; NM_183001.5; ENST00000368450.5; ENST00000448116.7	c.393C>T; c.-73C>T; c.63C>T	p.G131G; p.G21G	synonymous	Uncertain Significance				14	150853919	0.018
1	154966093	154966093	q21.3	C	T	SNV	Exonic	LENEP	ENST00000392487.1; NM_018655.3	c.10C>T	p.R4W	missense	Uncertain Significance			Possibly Damaging	23.1	146522403	0.134
1	155003061	155003061	q22	T	C	SNV	Exonic	DCST2	ENST00000368424.4; NM_144622.3	c.866A>G	p.H289R	missense	Uncertain Significance			Benign	22.8
1	155006015	155006015	q22	A	C	SNV	Promoter; Exonic	DCST1; DCST2	ENST00000368424.4; ENST00000295542.6; NM_152494.4; NM_001143687.2; ENST00000423025.6; ENST00000368419.2; NM_144622.3	c.-498A>C; c.163T>G; c.-381A>C	p.C55G	missense	Uncertain Significance			Probably Damaging	25.5	114853794	0.157
1	155013935	155013935	q22	T	C	SNV	Exonic	DCST1	ENST00000295542.6; NM_001143687.2; NM_152494.4; ENST00000423025.6; ENST00000368419.2	c.594T>C; c.519T>C	p.D173D; p.D198D	synonymous	Likely Benign				< 10	138800616	0.062
1	155015900	155015900	q22	G	A	SNV	Exonic	DCST1	ENST00000295542.6; NM_152494.4; NM_001143687.2; ENST00000423025.6; ENST00000368419.2	c.1012G>A; c.1087G>A	p.V363M; p.V338M	missense	Uncertain Significance	Tolerated	0.06	Possibly Damaging	17.11	199794962	0.017
1	155018875	155018875	q22	C	G	SNV	Exonic; Intronic	DCST1-AS1; DCST1	NR_040772.1; ENST00000295542.6; NM_001143687.2; NM_152494.4; ENST00000423025.6; ENST00000368419.2; NR_040773.1	n.329-244G>C; c.1333C>G; n.653-153G>C; c.1408C>G	p.L470V; p.L445V	missense	Uncertain Significance	Tolerated	0.31	Benign	15.53	202162660	0.002						4022921	0.35
1	155025945	155025945	q22	A	T	SNV	Exonic; Intronic; ncRNA	DCST1-AS1; ADAM15	ENST00000447332.3; ENST00000449910.6; NM_207195.3; ENST00000531455.5; ENST00000368412.7; NR_048577.2; NM_207194.3; NM_001261466.2; NM_001261465.2; ENST00000355956.6; NR_048578.2; NM_207197.3; ENST00000360674.8; ENST00000359280.8; NM_207191.3; NM_001261464.2; NM_003815.5; NR_040773.1; NM_207196.3; ENST00000271836.10; ENST00000356955.7; NR_048579.2	c.216-441A>T; c.239A>T; n.236-4108T>A; c.269A>T; n.310A>T	p.H80L; p.H90L	missense	Uncertain Significance	Activating	1	Possibly Damaging	23.1	76268440	0.105
1	155029748	155029748	q22	C	T	SNV	Exonic; ncRNA; Intronic	DCST1-AS1; ADAM15	ENST00000447332.3; ENST00000449910.6; NM_207195.3; ENST00000531455.5; NR_048577.2; NM_207194.3; ENST00000368412.7; NM_001261466.2; NM_001261465.2; ENST00000355956.6; NR_048578.2; NM_207197.3; ENST00000360674.8; ENST00000359280.8; NM_207191.3; NM_001261464.2; NM_003815.5; NR_040773.1; NM_207196.3; ENST00000271836.10; ENST00000356955.7; NR_048579.2	n.1304C>T; n.235+6485G>A; c.1263C>T; c.1233C>T; c.1185C>T	p.F421F; p.F411F; p.F395F	synonymous	Likely Benign				< 10	116488141	0.248
1	155057662	155057662	q22	C	G	SNV	Exonic	AL691442.1; EFNA3	ENST00000368408.4; ENST00000505139.1; NM_004952.5	c.209C>G; c.224C>G	p.A70G; p.A75G	missense	Uncertain Significance	Tolerated	0.1	Benign	22.5
1	155150593	155150593	q22	G	A	SNV	Exonic; ncRNA	TRIM46	ENST00000368385.8; ENST00000545012.5; ENST00000368382.5; NM_001282379.2; NR_046329.2; NM_001282378.2; NR_104150.2; NM_025058.5; ENST00000611379.1; ENST00000334634.9; ENST00000392451.6; NM_001256601.1; NR_046327.2; NM_001256599.2	c.956G>A; n.1424G>A; c.647G>A; n.1143G>A; c.986G>A; c.1025G>A; c.899G>A	p.R342Q; p.R300Q; p.R216Q; p.R319Q; p.R329Q	missense	Uncertain Significance	Damaging	0.02	Possibly Damaging	23.9	61756357	0.298
1	155152266	155152266	q22	C	A	SNV	Exonic; ncRNA	TRIM46	ENST00000368385.8; ENST00000545012.5; ENST00000368382.5; NM_001282379.2; NR_046329.2; NM_001282378.2; NR_104150.2; NM_025058.5; ENST00000611379.1; ENST00000392451.6; ENST00000334634.9; NM_001256601.1; NR_046327.2; NM_001256599.2	c.1318C>A; n.1600C>A; c.1405C>A; c.1066C>A; c.1444C>A; n.1881C>A; c.1375C>A	p.R440R; p.R356R; p.R459R; p.R469R; p.R482R	synonymous	Uncertain Significance				12.63	200642219	0.003
1	155154491	155154491	q22	C	T	SNV	Exonic; ncRNA	TRIM46	ENST00000545012.5; ENST00000368382.5; NR_046329.2; NM_001282378.2; NM_025058.5; ENST00000334634.9; ENST00000611379.1; ENST00000392451.6; NM_001256601.1; NR_046327.2; NM_001256599.2	c.1752C>T; c.1713C>T; c.1374C>T; n.2189C>T; c.1626C>T; n.1908C>T; c.1683C>T	p.D561D; p.D542D; p.D584D; p.D571D; p.D458D	synonymous	Likely Benign				< 10	111990855	0.276
1	155170990	155170990	q22	G	A	SNV	Exonic; ncRNA; 5'UTR	THBS3	ENST00000457183.6; NM_001252608.2; NR_045553.2; ENST00000541990.5; ENST00000541576.5; NM_001252607.2; NM_007112.5; ENST00000368378.7	c.1308C>T; c.975C>T; n.1340C>T; c.-79C>T; c.1335C>T	p.N325N; p.N436N; p.N445N	synonymous	Uncertain Significance				< 10	115675669	0.005
1	155205047	155205047	q22	C	T	SNV	Exonic	GBA	NM_001005741.3; ENST00000327247.9; ENST00000368373.8; NM_001171811.2; NM_001005742.3; NM_000157.4; ENST00000427500.7; NM_001171812.2; ENST00000428024.3	c.1444G>A; c.1183G>A; c.1297G>A	p.D482N; p.D395N; p.D433N	missense	Uncertain Significance	Tolerated	0.74	Benign	< 10	75671029	0.07	RCV001174737.1; RCV001582465.1; RCV000004582.3	245767	606463	168600
1	155218230	155218230	q22	C	T	SNV	Exonic; Intronic	FAM189B	NM_006589.3; ENST00000368368.7; ENST00000621094.4; NM_001267608.2; ENST00000361361.7; ENST00000350210.6; NM_198264.2	c.1491G>A; c.596-910G>A; c.1257G>A; c.1545G>A	p.E515E; p.E419E; p.E497E	synonymous	Uncertain Significance				10.79	140120577	0.055
1	155224497	155224497	q22	C	T	SNV	Exonic	FAM189B	NM_006589.3; ENST00000368368.7; ENST00000621094.4; NM_001267608.2; ENST00000361361.7; ENST00000350210.6; NM_198264.2	c.172G>A	p.V58I	missense	Uncertain Significance			Benign	16.53	149676360	0.002
1	155224554	155224554	q22	G		Deletion	Exonic	FAM189B	NM_006589.3; ENST00000368368.7; ENST00000621094.4; NM_001267608.2; ENST00000361361.7; ENST00000350210.6; NM_198264.2	c.115delC	p.L39fs*55; p.L39fs*98; p.L39fs*52	frameshift	Uncertain Significance				28.8		0.001
1	155224555	155224555	q22	C	A	SNV	Exonic	FAM189B	NM_006589.3; ENST00000368368.7; ENST00000621094.4; NM_001267608.2; ENST00000361361.7; ENST00000350210.6; NM_198264.2	c.114G>T	p.G38G	synonymous	Uncertain Significance				13.36	764066013	0.001
1	155230380	155230380	q22	G	A	SNV	Exonic	SCAMP3	NM_005698.4; NM_052837.3; ENST00000355379.3; ENST00000302631.8	c.215C>T; c.137C>T	p.S46L; p.S72L	missense	Uncertain Significance	Tolerated	0.17	Benign	23.8	200784811	0.002
1	155254459	155254459	q22	G	A	SNV	Intronic; Exonic	HCN3	NM_020897.3; ENST00000368358.4; NR_073074.2	n.999-4G>A; c.1000G>A	p.V334I	missense	Uncertain Significance	Tolerated	0.06	Benign	23.6	61749584	0.217
1	155261649	155261649	q22	C	T	SNV	Exonic	PKLR	NM_000298.6; ENST00000392414.7; ENST00000342741.6; NM_181871.4	c.1423G>A; c.1516G>A	p.V475I; p.V506I	missense	Uncertain Significance	Tolerated	0.43	Benign	20.2	8177988	0.425	RCV000764981.1; RCV001095923.1; RCV000224042.7; RCV000999757.2
1	155264409	155264409	q22	C	T	SNV	Exonic	PKLR	NM_000298.6; ENST00000392414.7; ENST00000342741.6; NM_181871.4	c.736G>A; c.829G>A	p.E277K; p.E246K	missense	Uncertain Significance	Tolerated	0.33	Possibly Damaging	22.6	147689373	0.086	RCV000946502.3; RCV001001692.1; RCV001097711.1
1	155279722	155279722	q22	C	T	SNV	Exonic; Intronic	FDPS	ENST00000356657.10; NM_002004.4; NM_001135821.2; ENST00000368356.9; NM_001378424.1; NM_001378425.1; NM_001242825.2; NM_001242824.2; NM_001135822.2	c.-175+966C>T; c.142C>T; c.-1-133C>T; c.-22-112C>T	p.R48C	missense	Uncertain Significance			Probably Damaging	26.9	35362111	0.336
1	155291642	155291642	q22	G	A	SNV	Exonic; Intronic	RUSC1-AS1; RUSC1	NM_001105204.2; ENST00000368352.10; ENST00000368354.7; NR_145424.1; NR_145425.1; NM_001105203.2; NR_145426.1	n.100-156C>T; n.90+1905C>T; n.295-156C>T; c.78G>A	p.L26L	synonymous	Uncertain Significance				12.99	749135751	0.002
1	155292697	155292697	q22	G	A	SNV	Exonic; Intronic; Promoter	RUSC1-AS1; RUSC1	ENST00000292254.8; ENST00000368347.8; ENST00000471876.5; NM_001105204.2; NM_001278230.2; ENST00000368352.10; ENST00000368354.7; NR_145424.1; NM_001105205.1; NR_103478.2; NM_001278229.1; ENST00000368349.8; NR_145425.1; ENST00000490373.5; NM_014328.4; NM_001278228.1; NM_001278227.1; NM_001105203.2; NR_145426.1	c.-2521G>A; n.100-469C>T; c.-1989G>A; n.90+850C>T; n.-1601G>A; c.-1887G>A; c.-1512G>A; n.99+1172C>T; c.-2455G>A; c.-1732G>A; c.1133G>A	p.S378N	missense	Uncertain Significance	Tolerated	0.33	Benign	21.1	201174518	0.034
1	155408747	155408747	q22	A	G	SNV	Exonic	ASH1L	NM_018489.3; NM_001366177.2; ENST00000368346.7	c.5199T>C	p.S1733S	synonymous	Likely Benign				< 10	72993421	0.177	RCV000893544.2
1	155449067	155449067	q22	G	A	SNV	Exonic	ASH1L	NM_018489.3; NM_001366177.2; ENST00000368346.7	c.3594C>T	p.P1198P	synonymous	Uncertain Significance				10.63	144333010	0.048	RCV000903681.1
1	155450236	155450236	q22	G	A	SNV	Exonic	ASH1L	NM_018489.3; NM_001366177.2; ENST00000368346.7	c.2425C>T	p.L809L	synonymous	Likely Benign				< 10	34039531	0.213	RCV000972653.2
1	155451719	155451719	q22	C	T	SNV	Exonic	ASH1L	NM_018489.3; NM_001366177.2; ENST00000368346.7	c.942G>A	p.A314A	synonymous	Likely Benign				< 10	115209829	0.225	RCV000891443.2
1	155630543	155630543	q22	C	T	SNV	Exonic; 3'UTR	YY1AP1	ENST00000368340.9; NM_001198899.2; ENST00000347088.9; ENST00000359205.9; NM_001198906.2; ENST00000404643.5; ENST00000407221.5; ENST00000355499.9; ENST00000311573.9; NM_018253.4; NM_001198905.2; NM_001198904.1; ENST00000405763.7; NM_001198900.2; ENST00000295566.8; ENST00000368330.6; NM_139121.3; NM_139119.3; NM_001198903.1; NM_001198901.2; ENST00000368339.9; ENST00000361831.9; NM_139118.3; NM_0011…	c.1512G>A; c.1098G>A; c.960G>A; c.1125G>A; c.1296G>A; c.1572G>A; c.1065G>A; c.*477G>A; c.*101G>A; c.1158G>A	p.K504K; p.K524K; p.K366K; p.K355K; p.K375K; p.K386K; p.K320K; p.K432K	synonymous	Likely Benign				10.15	141378369	0.129	RCV000972367.2
1	155649287	155649287	q22	C	A	SNV	Exonic; Promoter; 5'UTR	SCARNA26A; YY1AP1	NM_139118.3; ENST00000347088.9; ENST00000359205.9; ENST00000404643.5; ENST00000407221.5; NM_001198904.1; ENST00000405763.7; ENST00000295566.8; ENST00000368330.6; NM_139119.3; ENST00000368339.9; ENST00000361831.9; ENST00000368340.9; NM_001198899.2; NM_001198906.2; ENST00000311573.9; ENST00000355499.9; NM_018253.4; NM_001198905.2; NM_001198900.2; NR_132762.1; NM_139121.3; NM_001198903.1; NM_0011989…	c.5G>T; c.452G>T; n.-241G>T; c.38G>T; c.236G>T; c.-317G>T	p.G79V; p.G13V; p.G151V; p.G2V	missense	Uncertain Significance	Damaging	0	Probably Damaging	24.5	138164527	0.007
1	155686826	155686826	q22	G	T	SNV	Exonic; Intronic	DAP3	NM_001199850.1; NM_004632.4; ENST00000535183.5; ENST00000465375.5; NM_001199849.1; ENST00000343043.7; ENST00000421487.6; NM_001199851.1; NM_033657.2; ENST00000368336.10	c.46-4482G>T; c.75G>T	p.G25G	synonymous	Uncertain Significance				< 10	145834196	0.011
1	155699032	155699032	q22	G	T	SNV	Exonic	DAP3	NM_001199850.1; NM_004632.4; ENST00000535183.5; NM_001199849.1; ENST00000343043.7; ENST00000421487.6; NM_001199851.1; NM_033657.2; ENST00000368336.10	c.718G>T; c.595G>T; c.616G>T	p.V199F; p.V206F; p.V240F	missense	Likely Benign	Damaging	0.01	Probably Damaging	28.3	57692591	0.199	RCV000974037.1
1	155721856	155721856	q22	G	C	SNV	Exonic; 3'UTR	GON4L	NM_001282856.2; ENST00000368331.6; ENST00000615926.4; ENST00000620426.4; NM_001282860.2; NM_001282858.2	c.6368C>G; c.6365C>G; c.*1820C>G	p.A2123G; p.A2122G	missense	Uncertain Significance	Tolerated	1		< 10	34350174	0.005
1	155731991	155731991	q22	T	A	SNV	Exonic; 3'UTR	GON4L	NM_001282856.2; ENST00000368331.6; ENST00000615926.4; ENST00000620426.4; NM_001282860.2; NM_001282858.2	c.*682A>T; c.4901A>T	p.Y1634F	missense	Uncertain Significance	Damaging	0.01		24.8
1	155735585	155735585	q22	C	T	SNV	Exonic; Intronic	GON4L	NM_001282861.2; NM_001282856.2; ENST00000368331.6; ENST00000615926.4; ENST00000361040.9; ENST00000620426.4; NM_001282860.2; NM_032292.6; NM_001282858.2	c.3679G>A; c.2817-444G>A	p.V1227M	missense	Uncertain Significance	Tolerated	0.07	Benign	13.01	61748905	0.262
1	155735790	155735790	q22	G	A	SNV	Exonic; Intronic	GON4L	NM_001282861.2; NM_001282856.2; ENST00000368331.6; ENST00000615926.4; ENST00000361040.9; ENST00000620426.4; NM_001282860.2; NM_032292.6; NM_001282858.2	c.3474C>T; c.2817-649C>T	p.G1158G	synonymous	Likely Benign				< 10	150057388	0.208
1	155735994	155735994	q22	A	G	SNV	Exonic; Intronic	GON4L	NM_001282861.2; NM_001282856.2; ENST00000368331.6; ENST00000615926.4; ENST00000361040.9; ENST00000620426.4; NM_001282860.2; NM_032292.6; NM_001282858.2	c.2816+454T>C; c.3270T>C	p.T1090T	synonymous	Uncertain Significance				< 10	376860668	0
1	155790378	155790378	q22	A	C	SNV	Intronic	GON4L	NM_001282861.2; NM_001282856.2; ENST00000368331.6; ENST00000615926.4; ENST00000361040.9; ENST00000620426.4; NM_001282860.2; NM_032292.6; NM_001282858.2	c.1014+19T>G			Likely Benign				< 10	75476081	0.329
1	155838008	155838008	q22	T	C	SNV	Exonic	SYT11	NM_152280.5; ENST00000368324.5	c.287T>C	p.V96A	missense	Uncertain Significance	Tolerated	0.49	Benign	16.43
1	155903539	155903539	q22	C	G	SNV	Exonic	KHDC4	ENST00000368321.8; ENST00000368320.7; ENST00000368319.3; NM_014949.4	c.140G>C	p.G47A	missense	Uncertain Significance	Tolerated	0.89	Benign	17.92	758954942	0.003
1	155903588	155903588	q22	G	A	SNV	Exonic	KHDC4	ENST00000368321.8; ENST00000368320.7; ENST00000368319.3; NM_014949.4	c.91C>T	p.P31S	missense	Uncertain Significance			Benign	11.5	149444935	0.01
1	155920126	155920126	q22	C	A	SNV	Exonic	ARHGEF2	ENST00000673475.1; ENST00000313695.11; ENST00000361247.9; NM_001162384.2; NM_004723.4; NM_001162383.2; NM_001350110.2; NM_001350111.2; ENST00000313667.8; NM_001350112.2	c.3280G>T; c.2848G>T; c.2797G>T; c.2851G>T; c.2770G>T; c.2767G>T	p.G1094C; p.G950C; p.G951C; p.G924C; p.G923C; p.G933C	missense	Likely Benign	Tolerated	0.1	Benign	22.9	56794580	0.281	RCV000953005.2
1	156095982	156095982	q22	G	A	SNV	Promoter; Intronic; 5'UTR	LMNA	ENST00000368299.7; ENST00000675939.1; NM_005572.4; ENST00000676385.2; NM_170707.4; NM_001282625.2; ENST00000675667.1; NM_170708.4; NM_001282624.2; NM_001257374.3; ENST00000368301.6; ENST00000368297.5; ENST00000473598.6; NM_001282626.2; ENST00000368300.9; ENST00000448611.6	c.-13G>A; c.-484G>A; c.-100G>A; c.357-4426G>A			Likely Benign				< 10	540937543	0.026	RCV000126633.1
1	156100489	156100489	q22	C	T	SNV	Exonic	LMNA	ENST00000675939.1; NM_005572.4; ENST00000368299.7; NM_170707.4; ENST00000676385.2; NM_001282625.2; ENST00000675667.1; NM_170708.4; NM_001282624.2; NM_001257374.3; ENST00000368301.6; ENST00000368297.5; ENST00000473598.6; ENST00000368300.9; NM_001282626.2; ENST00000448611.6	c.141C>T; c.438C>T; c.195C>T; c.102C>T	p.A146A; p.A34A; p.A65A; p.A47A	synonymous	Likely Benign				< 10	80356805	0.233	RCV000768711.2; RCV000587594.3; RCV000617451.1; RCV001086851.2; RCV000041349.9
1	156144743	156144743	q22	C	A	SNV	Intronic	SEMA4A	NM_001370571.1; ENST00000368284.5; ENST00000368285.8; NM_001193300.2; NM_001370568.1; NM_001370569.1; NM_001193301.2; ENST00000355014.6; ENST00000368282.1; NM_022367.4; NM_001370567.1; NM_001193302.2	c.927+12C>A; c.1434+12C>A; c.1137+12C>A; c.1038+12C>A			Likely Benign				< 10	114835695	0.151	RCV001097617.1; RCV001095832.1; RCV001516461.1
1	156195423	156195423	q22	C	T	SNV	Exonic; Intronic	PMF1-BGLAP; PMF1	ENST00000368277.3; NM_001199662.1; ENST00000490491.5; ENST00000320139.5; NM_001199663.1; NM_001199654.1; ENST00000368273.8; NM_007221.3; NM_001199664.1; ENST00000368279.7; NM_001199653.1; NM_001199661.1	c.237C>T; c.162-10656C>T; c.162-6688C>T	p.F79F	synonymous	Likely Benign				< 10	143866378	0.169
1	156252454	156252454	q22	G	A	SNV	Promoter; Exonic; 5'UTR; Intronic	TMEM79; SMG5	NM_001323616.2; NR_026678.2; NM_032323.3; ENST00000295694.9; NM_001323614.2; NM_001323617.2; ENST00000405535.3; NM_015327.3; NM_001323615.2; ENST00000361813.5	c.-313C>T; c.-1787G>A; c.-446G>A; c.-124-3629C>T; c.18C>T; n.-269G>A	p.P6P	synonymous	Uncertain Significance				12.16	140385195	0.279
1	156256175	156256177	q22	CTT		Deletion	Exonic; ncRNA; Intronic	SMG5; TMEM79	NR_026678.2; NM_032323.3; ENST00000295694.9; NM_001323617.2; ENST00000405535.3	n.1063_1065delTTC; c.886_888delTTC; c.-125+247_-125+249delAAG	p.F296del	in-frame	Uncertain Significance				21.3	1200546135	0.001
1	156261399	156261399	q22	C	T	SNV	Promoter; ncRNA; 3'UTR	SMG5; TMEM79	NR_026678.2; NM_032323.3; ENST00000295694.9; NM_001323617.2; ENST00000405535.3	n.1372C>T; c.*10C>T; c.-485G>A			Likely Benign				< 10	113763043	0.261
1	156279088	156279088	q22	C	T	SNV	Exonic; ncRNA	CCT3	NM_001008800.3; ENST00000368259.6; ENST00000295688.8; NR_036564.2; NM_005998.5; ENST00000472765.6; NR_036565.2	c.1405G>A; n.1761G>A; n.1810G>A; c.1426G>A; c.1540G>A	p.V476I; p.V514I; p.V469I	missense	Uncertain Significance	Tolerated	0.78	Benign	20.7	1422270029	0
1	156304640	156304640	q22	T	C	SNV	Intronic	CCT3	NM_001008800.3; ENST00000368259.6; ENST00000295688.8; NR_036564.2; NM_005998.5; ENST00000472765.6; NR_036565.2	c.9+19A>G; n.365+19A>G; c.93+978A>G; c.144+19A>G; n.414+19A>G			Uncertain Significance				< 10	199525023	0.02
1	156304712	156304712	q22	A	G	SNV	Intronic	CCT3	NM_001008800.3; ENST00000368259.6; ENST00000295688.8; NR_036564.2; NM_005998.5; ENST00000472765.6; NR_036565.2	c.93+906T>C; c.94-3T>C; c.-42-3T>C; n.364-3T>C; n.315-3T>C			Likely Benign				11.35	74116819	0.132	RCV000893266.1
1	156352547	156352548	q22	GT		Deletion	Exonic; ncRNA	RHBG	NM_020407.5; NM_001256396.2; NR_146763.2; NM_001256395.2; NR_046115.2; NR_146764.2; NR_146765.2; ENST00000537040.6	c.1125_1126delGT; n.1301_1302delGT; c.918_919delGT; c.1035_1036delGT; n.2010_2011delGT; n.1287_1288delGT	p.F307fs*66; p.F376fs*66; p.F346fs*66	frameshift	Uncertain Significance				17.53	748221604	0.005
1	156501046	156501048	q23.1	AAG		Deletion	Intronic	IQGAP3	NM_178229.5; ENST00000361170.7	c.4104-9_4104-7delCTT			Uncertain Significance				10.66		0.058
1	156503635	156503635	q23.1	A	G	SNV	Exonic	IQGAP3	NM_178229.5; ENST00000361170.7	c.3906T>C	p.P1302P	synonymous	Uncertain Significance				< 10	141890307	0.058
1	156509699	156509699	q23.1	A	T	SNV	Exonic	IQGAP3	NM_178229.5; ENST00000361170.7	c.2823T>A	p.G941G	synonymous	Uncertain Significance				10.71	77494039	0.214
1	156517967	156517967	q23.1	A	G	SNV	Exonic	IQGAP3	NM_178229.5; ENST00000361170.7	c.2202T>C	p.V734V	synonymous	Likely Benign				< 10	34229589	0.216
1	156518421	156518421	q23.1	C	T	SNV	Exonic	IQGAP3	NM_178229.5; ENST00000361170.7	c.1945G>A	p.G649S	missense	Likely Benign			Benign	< 10	77834544	0.22
1	156551447	156551447	q23.1	A	C	SNV	Exonic	TTC24	NM_001105669.4	c.291A>C	p.R97S	missense	Uncertain Significance	Damaging	0.02		20.4	149016796	0.318
1	156561933	156561933	q23.1	G	A	SNV	Exonic	NAXE	ENST00000368234.7; ENST00000368233.3; NM_144772.3; ENST00000368235.8	c.223G>A	p.E75K	missense	Uncertain Significance	Tolerated	0.19	Benign	23.5	142268064	0.006
1	156571216	156571216	q23.1	C	G	SNV	5'UTR; Exonic	GPATCH4	NM_182679.3; NM_015590.4; ENST00000438976.6; ENST00000368232.9	c.-74G>C; c.16G>C	p.G6R	missense	Uncertain Significance	Tolerated	0.12	Probably Damaging	23.5	200635908	0.013
1	156571217	156571217	q23.1	G	C	SNV	5'UTR; Exonic	GPATCH4	NM_182679.3; NM_015590.4; ENST00000438976.6; ENST00000368232.9	c.-75C>G; c.15C>G	p.S5R	missense	Likely Benign	Damaging	0.04	Benign	< 10	144806833	0.258
1	156616846	156616846	q23.1	G	A	SNV	Exonic	BCAN	ENST00000329117.10; ENST00000361588.5; NM_198427.2; NM_021948.5	c.345G>A	p.A115A	synonymous	Uncertain Significance				12.44	138385366	0.02
1	156640835	156640835	q23.1	C	T	SNV	Exonic	NES	NM_006617.2; ENST00000368223.4	c.3145G>A	p.G1049R	missense	Uncertain Significance	Damaging	0.02	Benign	14.56	1053580307	0.006
1	156643243	156643243	q23.1	T	C	SNV	Intronic	NES	NM_006617.2; ENST00000368223.4	c.982+3A>G			Uncertain Significance				17.89
1	156708367	156708367	q23.1	C	T	SNV	Exonic	MRPL24	ENST00000368211.8; NM_024540.4; ENST00000361531.6; NM_145729.3	c.130G>A	p.V44M	missense	Uncertain Significance	Damaging	0.01	Possibly Damaging	26.2	149267462	0.057
1	156714833	156714833	q23.1	C	T	SNV	Exonic; ncRNA	HDGF	NM_001319187.2; NR_135008.2; ENST00000537739.5; NM_001319188.2; NM_001126051.1; ENST00000368209.9; NM_001126050.2; NM_004494.3; ENST00000357325.10; NM_001319186.2	c.249G>A; c.174G>A; c.270G>A; n.403G>A; c.318G>A	p.E90E; p.E83E; p.E106E; p.E58E	synonymous	Uncertain Significance				11.76	17851699	0.147
1	156779097	156779097	q23.1	G	C	SNV	Exonic	SH2D2A	NM_001161442.2; ENST00000368198.7; NM_001161441.2; ENST00000392306.2; NM_001161444.2; ENST00000368199.8; NM_003975.4; NM_001161443.2	c.900C>G; c.816C>G; c.846C>G; c.930C>G	p.A272A; p.A282A; p.A300A; p.A310A	synonymous	Likely Benign				< 10	12071857	0.152
1	156779183	156779183	q23.1	G	A	SNV	Exonic	SH2D2A	NM_001161442.2; ENST00000368198.7; NM_001161441.2; ENST00000392306.2; NM_001161444.2; ENST00000368199.8; NM_003975.4; NM_001161443.2	c.844C>T; c.730C>T; c.814C>T; c.760C>T	p.R282C; p.R272C; p.R254C; p.R244C	missense	Uncertain Significance	Tolerated	0.06	Benign	14.47	12072861	0.153
1	156814884	156814884	q23.1	C	T	SNV	Intronic; Exonic	NTRK1; INSRR	NM_001007792.1; ENST00000674537.1; ENST00000368195.4; NM_014215.3	c.122+2899C>T; c.50+2899C>T; c.2421G>A	p.A807A	synonymous	Uncertain Significance				12.14	149474857	0.241
1	156821890	156821890	q23.1	C	T	SNV	Intronic; Exonic	NTRK1; INSRR	NM_001007792.1; ENST00000674537.1; ENST00000368195.4; NM_014215.3	c.50+9905C>T; c.122+9905C>T; c.731G>A	p.R244H	missense	Uncertain Significance	Tolerated	0.11	Benign	16.75	55951840	0.15
1	156830958	156830959	q23.1		G	Insertion	Intronic	NTRK1	ENST00000524377.7; ENST00000675461.1; NM_001007792.1; ENST00000358660.3; NM_001012331.2; ENST00000674537.1; NM_002529.4; ENST00000368196.7	c.51-3181dupG; c.212+27dupG; c.123-3181dupG			Uncertain Significance				7.97	373807059	0.1
1	156846180	156846180	q23.1	G	A	SNV	Intronic	NTRK1	ENST00000524377.7; NM_001007792.1; ENST00000358660.3; ENST00000674537.1; NM_001012331.2; NM_002529.4; ENST00000368196.7	c.1525-12G>A; c.1453-12G>A; c.1615-12G>A; c.1624-12G>A; c.1633-12G>A			Uncertain Significance				< 10	201904010	0.009
1	156849946	156849946	q23.1	G	A	SNV	Exonic	NTRK1	ENST00000524377.7; NM_001007792.1; ENST00000358660.3; NM_001012331.2; ENST00000674537.1; ENST00000368196.7; NM_002529.4	c.2193G>A; c.2184G>A; c.2022G>A; c.2202G>A; c.2094G>A	p.T734T; p.T698T; p.T674T; p.T731T; p.T728T	synonymous	Likely Benign				< 10	55668752	0.168	RCV000439601.2; RCV000372018.6; RCV000755591.3					9494399	0.19
1	156851315	156851315	q23.1	G	A	SNV	Exonic	NTRK1	ENST00000524377.7; NM_001007792.1; ENST00000358660.3; ENST00000674537.1; NM_001012331.2; ENST00000368196.7; NM_002529.4	c.2092G>A; c.2272G>A; c.2164G>A; c.2263G>A; c.2254G>A	p.A758T; p.A698T; p.A752T; p.A722T; p.A755T	missense	Likely Benign	Tolerated	0.33	Benign	23.9	62640939	0.169	RCV000712456.4; RCV001084241.3
1	156874544	156874544	q23.1	A	G	SNV	5'UTR; Exonic	PEAR1	NM_001080471.3; NM_001353682.2; NM_001353683.2	c.106A>G; c.-233A>G	p.T36A	missense	Uncertain Significance	Tolerated	0.61	Benign	19.49	74116909	0.1
1	156878007	156878007	q23.1	C	A	SNV	Exonic	PEAR1	NM_001080471.3; NM_001353682.2; NM_001353683.2	c.990C>A; c.798C>A	p.A330A; p.A266A	synonymous	Uncertain Significance				11.07	113704391	0.01
1	156878016	156878016	q23.1	A	G	SNV	Exonic	PEAR1	NM_001080471.3; NM_001353682.2; NM_001353683.2	c.999A>G; c.807A>G	p.A333A; p.A269A	synonymous	Uncertain Significance				11.22	144723686	0.014
1	156882081	156882081	q23.1	G	A	SNV	Exonic	PEAR1	NM_001080471.3; NM_001353682.2; NM_001353683.2	c.1994G>A; c.1802G>A	p.C601Y; p.C665Y	missense	Uncertain Significance	Damaging	0	Probably Damaging	28.4	781184799	0
1	156883029	156883029	q23.1	C	T	SNV	Exonic	PEAR1	NM_001080471.3; NM_001353682.2; NM_001353683.2	c.2466C>T; c.2274C>T	p.Y822Y; p.Y758Y	synonymous	Likely Benign				11.1	113502219	0.14	RCV000968531.1
1	156897721	156897721	q23.1	C	T	SNV	Exonic	LRRC71	ENST00000337428.8; NM_144702.3	c.921C>T	p.F307F	synonymous	Uncertain Significance				12.17	183062517	0.048
1	156900379	156900379	q23.1	A	G	SNV	Exonic	LRRC71	ENST00000337428.8; NM_144702.3	c.1299A>G	p.R433R	synonymous	Uncertain Significance				< 10	112139912	0.048
1	156909477	156909477	q23.1	A	G	SNV	Exonic	ARHGEF11	ENST00000361409.2; NM_198236.3; NM_014784.4; NM_001377419.1; ENST00000368194.8; NM_001377418.1	c.3959T>C; c.3929T>C; c.3950T>C; c.3839T>C	p.M1320T; p.M1317T; p.M1280T; p.M1310T	missense	Uncertain Significance	Tolerated	0.52	Benign	< 10	113239140	0.002
1	156921403	156921403	q23.1	C	T	SNV	Exonic	ARHGEF11	ENST00000361409.2; NM_198236.3; NM_014784.4; NM_001377419.1; ENST00000368194.8; NM_001377418.1	c.1878G>A; c.1767G>A; c.1857G>A; c.1887G>A	p.S629S; p.S589S; p.S619S; p.S626S	synonymous	Uncertain Significance				< 10	137983356	0.026
1	157069138	157069138	q23.1	C	T	SNV	Exonic	ETV3L	ENST00000671886.1; NM_001004341.2; ENST00000672100.1; ENST00000454449.3; ENST00000671942.1	c.91G>A	p.E31K	missense	Uncertain Significance	Damaging	0	Probably Damaging	26.2	111662736	0.005
1	157094747	157094747	q23.1	C	T	SNV	Exonic	ETV3	NM_001145312.3; ENST00000368192.9	c.1425G>A	p.R475R	synonymous	Uncertain Significance				< 10	535520534	0.072
1	157094915	157094915	q23.1	T	C	SNV	Exonic	ETV3	NM_001145312.3; ENST00000368192.9	c.1257A>G	p.K419K	synonymous	Likely Benign				< 10	115176550	0.125
1	157095676	157095676	q23.1	G	A	SNV	Exonic	ETV3	NM_001145312.3; ENST00000368192.9	c.496C>T	p.P166S	missense	Uncertain Significance	Tolerated	0.26	Benign	19.84	148187329	0.004
1	157106152	157106152	q23.1	C	T	SNV	5'UTR	ETV3	ENST00000326786.4; NM_001145312.3; ENST00000368192.9; NM_005240.3	c.-8G>A			Uncertain Significance				17.8	2231852	0.191
1	157516802	157516802	q23.1	A	G	SNV	Exonic	FCRL5	ENST00000368190.7; ENST00000368189.3; NM_001195388.2; NM_031281.3; ENST00000361835.8	c.238T>C	p.S80P	missense	Uncertain Significance	Damaging	0.05	Benign	14.79	35655203	0.201
1	157516828	157516828	q23.1	G	A	SNV	Exonic	FCRL5	ENST00000368190.7; ENST00000368189.3; NM_001195388.2; NM_031281.3; ENST00000361835.8	c.212C>T	p.P71L	missense	Uncertain Significance	Tolerated	0.65	Benign	< 10	112398428	0.001
1	157551336	157551336	q23.1	G	A	SNV	Exonic	FCRL4	NM_031282.3; ENST00000271532.2	c.1234C>T	p.R412C	missense	Uncertain Significance	Tolerated	0.2	Possibly Damaging	20.9	146153860	0.021
1	157559012	157559012	q23.1	G	A	SNV	Exonic	FCRL4	NM_031282.3; ENST00000271532.2	c.289C>T	p.R97C	missense	Uncertain Significance	Tolerated	0.16	Possibly Damaging	13.79	138448208	0.004
1	157650874	157650874	q23.1	C	T	SNV	Exonic; ncRNA	FCRL3	NM_001320333.2; NR_135214.2; ENST00000368186.9; NR_135215.2; NR_135216.2; NM_052939.4; NR_135217.2; ENST00000368184.8	c.1854G>A; n.1773G>A; n.1963G>A; n.2058G>A; n.2076G>A	p.E618E	synonymous	Likely Benign				< 10	146903009	0.151	RCV000889016.1
1	157659701	157659701	q23.1	G	T	SNV	Exonic; ncRNA	FCRL3	NM_001320333.2; NR_135214.2; ENST00000368186.9; NR_135215.2; NR_135216.2; NM_052939.4; NR_135217.2; ENST00000368184.8	c.1697C>A; n.1901C>A; n.1616C>A; n.1806C>A; n.1919C>A	p.S566Y	missense	Uncertain Significance	Damaging	0.01	Probably Damaging	21	74120720	0.034
1	157666043	157666043	q23.1	G	A	SNV	Exonic; ncRNA	FCRL3	NM_001320333.2; NR_135214.2; ENST00000368186.9; NR_135215.2; NR_135216.2; NM_052939.4; NR_135217.2; ENST00000368184.8	n.838C>T; n.1123C>T; n.1028C>T; c.919C>T	p.L307F	missense	Likely Benign	Damaging	0	Probably Damaging	23.9	12041673	0.196	RCV000907001.1
1	157670289	157670289	q23.1	C	T	SNV	5'UTR; ncRNA	FCRL3	NM_001320333.2; NR_135214.2; ENST00000368186.9; NR_135215.2; NR_135216.2; NM_052939.4; NR_135217.2; ENST00000368184.8	n.195G>A; c.-10G>A			Likely Benign				< 10	144282361	0.184
1	157716577	157716577	q23.1	C	T	SNV	Intronic	FCRL2	NM_030764.4; NR_125358.2; ENST00000368181.4; ENST00000361516.8; NM_001159488.2	c.1489-13G>A; c.571-13G>A; n.630-13G>A; c.1308-13G>A			Uncertain Significance				< 10	372767519	0.02
1	157771315	157771315	q23.1	C	A	SNV	Exonic; Intronic	FCRL1	ENST00000358292.7; NM_001159398.2; ENST00000368176.8; NM_001159397.2; NM_052938.5; ENST00000491942.1	c.939G>T; c.886+390G>T	p.L313L	synonymous	Likely Benign				< 10	111870219	0.102
1	157771324	157771324	q23.1	A	C	SNV	Exonic; Intronic	FCRL1	ENST00000358292.7; NM_001159398.2; ENST00000368176.8; NM_001159397.2; NM_052938.5; ENST00000491942.1	c.886+381T>G; c.930T>G	p.I310M	missense	Likely Benign	Tolerated	0.12	Benign	< 10	59455899	0.296
1	158059271	158059271	q23.1	G	A	SNV	Exonic; Intronic	KIRREL1	ENST00000359209.11; ENST00000368173.7; NM_018240.7; ENST00000360089.8; ENST00000368172.1; NM_001286349.2	c.466G>A; c.553-21G>A; c.745-21G>A; c.1045-21G>A	p.E156K	missense	Uncertain Significance				20.7	200506136	0.007
1	158064538	158064538	q23.1	C	T	SNV	Exonic	KIRREL1	ENST00000359209.11; ENST00000368173.7; NM_018240.7; ENST00000360089.8; ENST00000368172.1; NM_001286349.2	c.1902C>T; c.1344C>T; c.1602C>T; c.1410C>T	p.D470D; p.D634D; p.D534D; p.D448D	synonymous	Uncertain Significance				< 10	142272439	0.06
1	158151902	158151902	q23.1	C	T	SNV	Exonic	CD1D	NM_001371761.1; NM_001766.4; ENST00000673701.2; ENST00000673723.4; ENST00000673623.2; ENST00000368171.5; NM_001371763.1; ENST00000674085.2; NM_001319145.2; NM_001371762.2	c.97C>T; c.409C>T	p.Q33*; p.Q137*	stop gain	Uncertain Significance				28.2	149673076	0.031
1	158152786	158152786	q23.1	G	T	SNV	Exonic; Intronic	CD1D	NM_001371761.1; NM_001766.4; ENST00000673701.2; ENST00000673723.4; ENST00000673623.2; ENST00000368171.5; NM_001371763.1; ENST00000674085.2; NM_001319145.2; NM_001371762.2	c.726G>T; c.414G>T; c.607+686G>T	p.E138D; p.E242D	missense	Uncertain Significance	Tolerated	0.18	Benign	17.55	149772303	0.018
1	158299248	158299248	q23.1	G	A	SNV	Exonic	CD1B	ENST00000368168.4; NM_001764.3	c.798C>T	p.T266T	synonymous	Likely Benign				< 10	143672671	0.048
1	158325746	158325746	q23.1	G	A	SNV	Exonic; Intronic	CD1E	NM_001185114.2; ENST00000368163.7; ENST00000368164.7; NM_001185113.2; NM_001185112.2; ENST00000368160.7; NM_001042587.3; ENST00000368155.7; ENST00000368161.7; NM_001185110.2; ENST00000368154.5; ENST00000368157.5; NM_001042586.3; ENST00000444681.6; ENST00000368156.5; NM_001042585.3; NM_030893.4; ENST00000368165.7; NM_001042584.3; ENST00000368167.8; NM_001185107.2; ENST00000368166.7; NM_001042583.3…	c.188G>A; c.458G>A; c.739+16G>A; c.755G>A; c.485G>A; c.172+16G>A; c.469+16G>A	p.R153Q; p.R252Q; p.R162Q; p.R63Q	missense	Uncertain Significance	Tolerated	0.83	Benign	< 10	200753711	0.018
1	158389900	158389900	q23.1	C	T	SNV	Exonic	OR10K2	ENST00000641042.1; NM_001004476.2	c.757G>A	p.G253S	missense	Uncertain Significance	Tolerated	0.06	Benign	20.7	144201061	0.266
1	158390028	158390028	q23.1	G	C	SNV	Exonic	OR10K2	ENST00000641042.1; NM_001004476.2	c.629C>G	p.P210R	missense	Uncertain Significance	Damaging	0	Probably Damaging	22.2	76478452	0.214
1	158390035	158390035	q23.1	C	T	SNV	Exonic	OR10K2	ENST00000641042.1; NM_001004476.2	c.622G>A	p.A208T	missense	Uncertain Significance	Tolerated	0.19	Benign	10.42	12240099	0.264
1	158390119	158390119	q23.1	C	T	SNV	Exonic	OR10K2	ENST00000641042.1; NM_001004476.2	c.538G>A	p.D180N	missense	Uncertain Significance	Damaging	0	Probably Damaging	23.8	73019729	0.215
1	158390229	158390229	q23.1	C	A	SNV	Exonic	OR10K2	ENST00000641042.1; NM_001004476.2	c.428G>T	p.G143V	missense	Likely Benign	Tolerated	0.35	Benign	< 10	73019731	0.215
1	158390293	158390293	q23.1	G	A	SNV	Exonic	OR10K2	ENST00000641042.1; NM_001004476.2	c.364C>T	p.R122C	missense	Uncertain Significance	Damaging	0	Probably Damaging	25.1	111878656	0.003
1	158390380	158390380	q23.1	A	G	SNV	Exonic	OR10K2	ENST00000641042.1; NM_001004476.2	c.277T>C	p.S93P	missense	Uncertain Significance	Damaging	0.04	Possibly Damaging	23.7	150834362	0.071
1	158390541	158390541	q23.1	A	C	SNV	Exonic	OR10K2	ENST00000641042.1; NM_001004476.2	c.116T>G	p.L39R	missense	Uncertain Significance	Damaging	0	Probably Damaging	24.2	79869455	0.264
1	158435658	158435658	q23.1	T	C	SNV	Exonic	OR10K1	ENST00000641460.1; NM_001004473.2; ENST00000289451.4; ENST00000641535.1; ENST00000641971.1; ENST00000641432.1	c.307T>C	p.S103P	missense	Uncertain Significance	Damaging	0	Benign	11.2	140049099	0.056
1	158435704	158435704	q23.1	T	C	SNV	Exonic	OR10K1	ENST00000641460.1; NM_001004473.2; ENST00000289451.4; ENST00000641535.1; ENST00000641971.1; ENST00000641432.1	c.353T>C	p.M118T	missense	Uncertain Significance	Damaging	0	Probably Damaging	23.6	145698229	0.106
1	158436286	158436289	q23.1	TTAG		Deletion	Exonic	OR10K1	ENST00000641460.1; NM_001004473.2; ENST00000289451.4; ENST00000641535.1; ENST00000641971.1; ENST00000641432.1	c.938_941delGTTA	p.S313fs*?	frameshift	Uncertain Significance				22.9	553006126	0.148
1	158449854	158449854	q23.1	G	A	SNV	Exonic	OR10R2	ENST00000641067.1; ENST00000641400.1; ENST00000368152.1; NM_001004472.1	c.154G>A; c.187G>A	p.V52I; p.V63I	missense	Likely Benign	Tolerated	0.85	Benign	< 10	62642484	0.285
1	158532457	158532457	q23.1	C	T	SNV	Exonic	OR6P1	NM_001160325.2; ENST00000641540.1; ENST00000334632.1	c.938G>A	p.R313K	missense	Likely Benign	Tolerated	0.14	Benign	< 10	139022609	0.12
1	158532727	158532727	q23.1	G	A	SNV	Exonic	OR6P1	NM_001160325.2; ENST00000641540.1; ENST00000334632.1	c.668C>T	p.A223V	missense	Likely Benign	Tolerated	0.54	Benign	< 10	113799243	0.185
1	158532925	158532925	q23.1	A	T	SNV	Exonic	OR6P1	NM_001160325.2; ENST00000641540.1; ENST00000334632.1	c.470T>A	p.M157K	missense	Uncertain Significance	Damaging	0.02	Benign	21.7	114119242	0.205
1	158533095	158533095	q23.1	T	C	SNV	Exonic	OR6P1	NM_001160325.2; ENST00000641540.1; ENST00000334632.1	c.300A>G	p.Q100Q	synonymous	Likely Benign				< 10	73014246	0.178
1	158533298	158533299	q23.1		A	Insertion	Exonic	OR6P1	NM_001160325.2; ENST00000641540.1; ENST00000334632.1	c.96dupT	p.A33fs*59	frameshift	Uncertain Significance				15.61		0.23						405160	0.6
1	158549152	158549152	q23.1	A	G	SNV	Exonic	OR10X1	ENST00000623167.1; NM_001004477.1	c.538T>C	p.F180L	missense	Uncertain Significance			Probably Damaging	24.3	16840360	0.113
1	158576394	158576394	q23.1	C	A	SNV	Exonic	OR10Z1	ENST00000361284.1; ENST00000641002.1; NM_001004478.2	c.166C>A	p.H56N	missense	Uncertain Significance	Damaging	0	Probably Damaging	24.4	116792162	0.205
1	158587368	158587368	q23.1	T	C	SNV	Exonic	SPTA1	NM_003126.4; ENST00000643759.2	c.6559A>G	p.K2187E	missense	Likely Benign	Tolerated	0.65	Benign	18.49	111980420	0.286	RCV000224296.2; RCV000359753.2; RCV000267463.2; RCV000324672.2
1	158588997	158588997	q23.1	T	A	SNV	Intronic	SPTA1	NM_003126.4; ENST00000643759.2	c.6530+15A>T			Likely Benign				< 10	78561085	0.286	RCV000395812.2; RCV000347384.2; RCV000290666.2
1	158612181	158612181	q23.1	A	G	SNV	Intronic	SPTA1	NM_003126.4; ENST00000643759.2	c.4737+20T>C			Uncertain Significance				< 10	763341291	0.001
1	158623092	158623092	q23.1	T	A	SNV	Exonic	SPTA1	NM_003126.4; ENST00000643759.2	c.3160A>T	p.T1054S	missense	Likely Benign	Tolerated	0.13	Benign	< 10	145054175	0.142	RCV000278510.2; RCV000756700.2; RCV000335941.2; RCV000405289.2
1	158623103	158623103	q23.1	G	A	SNV	Exonic	SPTA1	NM_003126.4; ENST00000643759.2	c.3149C>T	p.P1050L	missense	Likely Benign	Tolerated	0.43	Benign	20.6	116297260	0.212	RCV000756701.2; RCV000283271.2; RCV000340574.2; RCV000404635.2
1	158623190	158623190	q23.1	T	A	SNV	Exonic	SPTA1	NM_003126.4; ENST00000643759.2	c.3062A>T	p.D1021V	missense	Uncertain Significance	Damaging	0	Probably Damaging	24.8	200511900	0.04	RCV001336014.1; RCV001286464.1; RCV000974600.1
1	158626389	158626389	q23.1	T	C	SNV	Exonic	SPTA1	NM_003126.4; ENST00000643759.2	c.2863A>G	p.M955V	missense	Uncertain Significance	Tolerated	0.14	Benign	19.1	1348234804	0
1	158627417	158627417	q23.1	A	G	SNV	Exonic	SPTA1	NM_003126.4; ENST00000643759.2	c.2655T>C	p.R885R	synonymous	Likely Benign				< 10	368544526	0.03	RCV000260148.2; RCV000298890.2; RCV000895045.1; RCV000360836.2
1	158637868	158637868	q23.1	A		Deletion	Intronic	SPTA1	NM_003126.4; ENST00000643759.2	c.1834-14delT			Uncertain Significance				1.085			RCV000352036.1; RCV000393570.1; RCV000292434.1
1	158641199	158641199	q23.1	T	C	SNV	Exonic	SPTA1	NM_003126.4; ENST00000643759.2	c.1533A>G	p.A511A	synonymous	Likely Benign				< 10	34446973	0.228	RCV000263566.2; RCV000375177.2; RCV000973287.2; RCV000321040.2; RCV001001782.2
1	158644397	158644397	q23.1	T	C	SNV	Exonic	SPTA1	NM_003126.4; ENST00000643759.2	c.1181A>G	p.N394S	missense	Uncertain Significance	Tolerated	0.4	Benign	14.75	111834376	0.072	RCV000880558.3; RCV001001151.1; RCV001098396.1; RCV001098395.1; RCV001098394.1
1	158645965	158645965	q23.1	T	A	SNV	Exonic	SPTA1	NM_003126.4; ENST00000643759.2	c.1078A>T	p.T360S	missense	Likely Benign	Tolerated	0.28	Benign	13.25	34133563	0.16	RCV000382110.2; RCV000325111.2; RCV000267684.2; RCV000248680.1; RCV000966764.3
1	158669784	158669784	q23.1	T	C	SNV	Exonic	OR6K2	ENST00000359610.3; NM_001005279.3	c.659A>G	p.D220G	missense	Uncertain Significance	Tolerated	0.39	Benign	14.46	531095715	0.003
1	158687308	158687308	q23.1	C	T	SNV	Exonic	OR6K3	ENST00000368145.2; ENST00000368146.1; NM_001005327.3	c.598G>A; c.646G>A	p.V216M; p.V200M	missense	Uncertain Significance	Tolerated	0.09		23.1	151330882	0.168
1	158687744	158687744	q23.1	A	G	SNV	Exonic	OR6K3	ENST00000368145.2; ENST00000368146.1; NM_001005327.3	c.210T>C; c.162T>C	p.H70H; p.H54H	synonymous	Likely Benign				< 10	145868292	0.083
1	158735804	158735804	q23.1	G	A	SNV	Exonic	OR6N1	ENST00000335094.4; ENST00000641846.1; NM_001005185.2	c.669C>T	p.C223C	synonymous	Uncertain Significance				< 10	144611397	0.064
1	158943476	158943476	q23.1	A	G	SNV	Exonic; Intronic	PYHIN1	NM_198929.5; NM_152501.5; ENST00000392254.6; ENST00000392252.7; ENST00000368140.6; ENST00000368138.7; NM_198928.5; NM_198930.4	c.1360-3015A>G; c.1333-3015A>G; c.1399A>G; c.1372A>G	p.N458D; p.N467D	missense	Uncertain Significance			Benign	< 10
1	158943539	158943539	q23.1	C	T	SNV	Exonic; Intronic	PYHIN1	NM_198929.5; NM_152501.5; ENST00000392254.6; ENST00000392252.7; ENST00000368140.6; ENST00000368138.7; NM_198928.5; NM_198930.4	c.1360-2952C>T; c.1333-2952C>T; c.1435C>T; c.1462C>T	p.H488Y; p.H479Y	missense	Likely Benign			Benign	< 10	112218133	0.25
1	159021616	159021616	q23.1	G	A	SNV	Exonic	IFI16	NM_001206567.2; NM_005531.3; NM_001364867.2; NM_001376587.1; NM_001376588.1; NM_001376589.1; ENST00000368131.8; ENST00000359709.7; NM_001376591.1; NM_001376592.1; ENST00000368132.7	c.1645G>A; c.1477G>A; c.1813G>A	p.A549T; p.A605T; p.A493T	missense	Uncertain Significance	Damaging	0	Probably Damaging	24.4
1	159021815	159021815	q23.1	T	G	SNV	Exonic	IFI16	NM_001206567.2; NM_005531.3; NM_001364867.2; NM_001376587.1; NM_001376588.1; NM_001376589.1; ENST00000368131.8; ENST00000359709.7; NM_001376591.1; NM_001376592.1; ENST00000368132.7	c.2012T>G; c.1844T>G; c.1676T>G	p.V671G; p.V615G; p.V559G	missense	Likely Benign	Damaging	0.02	Benign	< 10	74122246	0.154
1	159284245	159284245	q23.2	T	C	SNV	Exonic	OR10J3	NM_001004467.1; ENST00000332217.5	c.205A>G	p.I69V	missense	Uncertain Significance	Tolerated	0.34	Benign	11.64	140632421	0.098
1	159409910	159409910	q23.2	C	T	SNV	Exonic	OR10J1	ENST00000423932.6; ENST00000642080.1; NM_001363557.2; NM_012351.3; NM_001363558.2; ENST00000641630.1	c.329C>T; c.362C>T	p.T110I; p.T121I	missense	Uncertain Significance	Tolerated	0.35		20.4	76241483	0.156
1	159799838	159799838	q23.2	C	T	SNV	Intronic; Exonic	SLAMF8	ENST00000368104.4; NM_001330741.2; ENST00000289707.10; NM_020125.3	c.41-2828C>T; c.223C>T	p.R75C	missense	Uncertain Significance			Benign	23.1	41317531	0.006						6989642	2.94
1	159799909	159799909	q23.2	C	T	SNV	Intronic; Exonic	SLAMF8	ENST00000368104.4; NM_001330741.2; ENST00000289707.10; NM_020125.3	c.41-2757C>T; c.294C>T	p.S98S	synonymous	Uncertain Significance				11.16	113551009	0.16
1	159897251	159897251	q23.2	A	G	SNV	Promoter; Exonic	TAGLN2; IGSF9	NM_020789.4; ENST00000368094.6; NM_001135050.2; ENST00000611023.1; NM_003564.3; ENST00000361509.7; ENST00000368097.9	c.3424T>C; c.3376T>C; c.2038T>C; c.-2040T>C	p.C1126R; p.C680R; p.C1142R	missense	Uncertain Significance	Damaging	0.01	Probably Damaging	27.4	74731205	0.11
1	159897583	159897583	q23.2	A	T	SNV	Exonic	IGSF9	NM_020789.4; ENST00000368094.6; NM_001135050.2; ENST00000611023.1; ENST00000361509.7	c.3325T>A; c.1939T>A; c.3277T>A	p.S1109T; p.S1093T; p.S647T	missense	Uncertain Significance	Tolerated	0.18	Benign	10.88	1055715286	0.001
1	160001524	160001524	q23.2	G	A	SNV	Exonic	PIGM	NM_145167.3; ENST00000368090.5	c.6C>T	p.G2G	synonymous	Likely Benign				< 10	61757715	0.256	RCV000958508.2; RCV000727605.1
1	160064735	160064735	q23.2	G	A	SNV	Exonic	IGSF8	ENST00000314485.12; ENST00000368086.5; NM_001320247.2; ENST00000614243.4; NM_052868.6; NM_001206665.2	c.366C>T	p.A122A	synonymous	Uncertain Significance				< 10	557958890	0.007
1	160085659	160085659	q23.2	G	A	SNV	Exonic	ATP1A2	NM_000702.4; ENST00000361216.8	c.8G>A	p.R3H	missense	Uncertain Significance	Tolerated	0.55	Benign	21.8	781687346	0.005	RCV000186804.5; RCV000694429.4					3385332	0.11
1	160090993	160090993	q23.2	G	A	SNV	Exonic	ATP1A2	NM_000702.4; ENST00000361216.8	c.129G>A	p.K43K	synonymous	Likely Benign				12.97	61734527	0.237	RCV000710687.3; RCV000116447.5; RCV000226425.7
1	160093713	160093713	q23.2	A	G	SNV	Intronic	ATP1A2	NM_000702.4; ENST00000361216.8	c.382-20A>G			Uncertain Significance				< 10	1405104499	0.001
1	160106516	160106516	q23.2	C	T	SNV	Intronic	ATP1A2	NM_000702.4; ENST00000361216.8	c.2709+11C>T			Likely Benign				< 10	115441094	0.024	RCV000123768.2
1	160121908	160121908	q23.2	C	G	SNV	Exonic	ATP1A4	NM_144699.4; ENST00000368081.9	c.78C>G	p.I26M	missense	Uncertain Significance	Tolerated	0.39	Benign	< 10	753818842	0.001						424305	0.08
1	160124942	160124942	q23.2	C	T	SNV	Exonic	ATP1A4	NM_144699.4; ENST00000368081.9	c.315C>T	p.F105F	synonymous	Likely Benign				< 10	140019547	0.173	RCV000973288.1
1	160129214	160129214	q23.2	T	C	SNV	Exonic	ATP1A4	NM_144699.4; ENST00000368081.9	c.676T>C	p.L226L	synonymous	Uncertain Significance				11.48	1185998414	0.001
1	160136383	160136383	q23.2	G	A	SNV	Exonic	ATP1A4	NM_144699.4; ENST00000368081.9	c.1113G>A	p.A371A	synonymous	Uncertain Significance				10.44	372583572	0.003
1	160136392	160136392	q23.2	G	A	SNV	Exonic	ATP1A4	NM_144699.4; ENST00000368081.9	c.1122G>A	p.T374T	synonymous	Uncertain Significance				< 10	767470139	0.008
1	160147429	160147429	q23.2	T	A	SNV	Exonic	ATP1A4	ENST00000470705.1; NM_001001734.2; NM_144699.4; ENST00000368081.9	c.2711T>A; c.119T>A	p.L904Q; p.L40Q	missense	Uncertain Significance	Damaging	0.02	Probably Damaging	27.4	141273117	0.027
1	160160568	160160568	q23.2	C	A	SNV	Exonic	CASQ1	NM_001231.5; ENST00000368078.8	c.27C>A	p.P9P	synonymous	Likely Benign				< 10	76394704	0.273	RCV000889536.2
1	160253413	160253413	q23.2	G	A	SNV	Exonic; ncRNA; Intronic	PEX19	NR_036493.2; NM_001193644.1; ENST00000368072.10; NM_002857.4; NR_036492.2	c.87C>T; n.80-514C>T; n.96C>T	p.F29F	synonymous	Uncertain Significance				13.24	141911166	0.018	RCV001087775.2; RCV000593387.4
1	160324042	160324042	q23.2	C	T	SNV	Exonic	NCSTN	NM_015331.3; NM_001290186.2; NM_001349729.2; ENST00000294785.10; NM_001290184.2	c.1314C>T; c.900C>T; c.1254C>T	p.G300G; p.G418G; p.G438G	synonymous	Likely Benign				< 10	61748944	0.283	RCV000955257.3
1	160390909	160390909	q23.2	C	T	SNV	Exonic	VANGL2	NM_020335.3; ENST00000368061.3	c.1005C>T	p.D335D	synonymous	Likely Benign				13.41	140982917	0.184	RCV000893267.1
1	160393965	160393965	q23.2	C	T	SNV	Exonic	VANGL2	NM_020335.3; ENST00000368061.3	c.1197C>T	p.A399A	synonymous	Uncertain Significance				11.52	750679281	0						8134485	0.21
1	160582319	160582319	q23.3	T	C	SNV	Exonic; ncRNA	SLAMF1	NR_104401.3; NR_104400.3; ENST00000302035.11; ENST00000538290.2; NR_104399.3; NM_003037.5; NM_001330754.2	c.999A>G; n.936A>G; c.916A>G; n.941A>G; n.851A>G	p.I306V; p.P333P	missense; synonymous	Likely Benign			Probably Damaging	24.4	80261622	0.131	RCV000893268.2
1	160616689	160616689	q23.3	G	A	SNV	Exonic; ncRNA	SLAMF1	NR_104401.3; NR_104400.3; ENST00000302035.11; NR_104399.3; ENST00000538290.2; NM_003037.5; NM_001330754.2	n.146C>T; c.47C>T	p.S16F	missense	Uncertain Significance	Damaging	0.05	Benign	13.48	145666807	0.278
1	160651170	160651170	q23.3	G	A	SNV	Exonic	CD48	NM_001256030.2; NM_001778.4; ENST00000368046.8; ENST00000613788.1	c.474C>T	p.G158G	synonymous	Uncertain Significance				< 10	139966437	0.009
1	160718233	160718233	q23.3	T	C	SNV	Exonic; Intronic	SLAMF7	ENST00000368042.7; NM_001282591.2; NM_001282596.2; ENST00000441662.6; ENST00000368043.8; NM_001282590.2; NM_001282588.2; ENST00000621377.4; ENST00000444090.6; NM_001282595.1; NM_001282594.2; NM_001282592.2; ENST00000458602.6; ENST00000458104.6; ENST00000359331.8; NM_001282589.2; NM_021181.5; NM_001282593.2	c.56-1378T>C; c.-26-1378T>C; c.305T>C	p.I102T	missense	Uncertain Significance	Tolerated	0.26	Benign	< 10
1	160771671	160771671	q23.3	C	A	SNV	Exonic; Intronic	LY9	NM_001261456.2; ENST00000368037.9; ENST00000368039.2; NM_001033667.3; ENST00000392203.8; ENST00000263285.11; NM_002348.4; NM_001261457.2	c.546C>A; c.454+1799C>A	p.T182T	synonymous	Likely Benign				10.97	73017973	0.221
1	160803848	160803848	q23.3	G	A	SNV	Exonic	CD244	ENST00000322302.7; NM_016382.4; NM_001166663.2; NM_001166664.2; ENST00000368034.9; ENST00000368033.7	c.968C>T; c.677C>T; c.953C>T	p.S318F; p.S226F; p.S323F	missense	Uncertain Significance	Damaging	0	Benign	15.85	12064925	0.232
1	160849101	160849101	q23.3	G	A	SNV	Exonic	ITLN1	ENST00000326245.4; NM_017625.3	c.789C>T	p.H263H	synonymous	Uncertain Significance				< 10	73027836	0.214
1	160851768	160851768	q23.3	C	T	SNV	Exonic	ITLN1	ENST00000326245.4; NM_017625.3	c.384G>A	p.A128A	synonymous	Uncertain Significance				< 10	147862456	0.04
1	160968873	160968873	q23.3	C	T	SNV	Exonic	F11R	ENST00000537746.1; NM_001348091.2; NM_001382734.1; NM_001382730.1; NM_016946.6; ENST00000368026.11; NM_001382733.1; NM_001382727.1	c.824G>A; c.794G>A; c.908G>A; c.677G>A; c.755G>A	p.S265N; p.S275N; p.S226N; p.S252N; p.S303N	missense	Uncertain Significance	Tolerated	0.67	Benign	11.58	145312674	0.088
1	160969703	160969703	q23.3	C	T	SNV	Exonic	F11R	ENST00000537746.1; NM_001348091.2; NM_001382734.1; NM_001382730.1; ENST00000368026.11; NM_016946.6; NM_001382733.1; NM_001382727.1	c.657G>A; c.588G>A; c.510G>A	p.G196G; p.G170G; p.G219G	synonymous	Likely Benign				< 10	149862476	0.233
1	161007576	161007576	q23.3	T	C	SNV	Exonic; 3'UTR	TSTD1	NM_001113206.2; ENST00000368024.5; NM_001113207.2; ENST00000318289.14; ENST00000368023.7; NM_001113205.2; ENST00000423014.3; ENST00000466967.1	c.214A>G; c.*93A>G; c.358A>G; c.178A>G; c.337A>G	p.K120E; p.K72E; p.K113E; p.K60E	missense	Uncertain Significance	Tolerated	0.06	Benign	17.76	868353914	0.001
1	161018422	161018422	q23.3	C	G	SNV	Exonic; Intronic	ARHGAP30	NM_181720.3; NM_001287600.2; ENST00000368013.8; NM_001287602.2; NM_001025598.2	c.1945G>C; c.2389G>C; c.1858G>C; c.2033-277G>C	p.D797H; p.D620H; p.D649H	missense	Uncertain Significance	Tolerated	0.12	Benign	14.31	61733353	0.274
1	161018598	161018598	q23.3	C	T	SNV	Exonic; Intronic	ARHGAP30	NM_181720.3; NM_001287600.2; ENST00000368013.8; NM_001287602.2; NM_001025598.2	c.1682G>A; c.2032+181G>A; c.1769G>A; c.2213G>A	p.G590E; p.G561E; p.G738E	missense	Uncertain Significance	Tolerated	0.61	Benign	< 10	139131986	0.021
1	161049499	161049499	q23.3	G	A	SNV	Exonic	NECTIN4	ENST00000368012.4; NM_030916.3	c.320C>T	p.P107L	missense	Uncertain Significance			Probably Damaging	24.2	78105657	0.555	RCV000890953.2
1	161068749	161068749	q23.3	G	A	SNV	Exonic; ncRNA	KLHDC9	NM_152366.5; ENST00000392192.6; NM_001007255.3; NR_033385.2; NR_033386.2; ENST00000368011.9	n.338G>A; c.424G>A	p.D142N	missense	Uncertain Significance	Damaging	0.04	Probably Damaging	23.7	112503677	0.051
1	161126769	161126769	q23.3	C	T	SNV	Exonic	UFC1	NM_016406.4; ENST00000368003.6	c.153C>T	p.N51N	synonymous	Uncertain Significance				11.41	142789001	0.127
1	161140517	161140517	q23.3	A	C	SNV	Exonic	PPOX	ENST00000544598.5; NM_001350128.2; NM_001365399.1; ENST00000367999.9; NM_001365401.1; NM_001365400.1; NM_000309.5; ENST00000352210.9; NM_001350129.2; NM_001350131.2; NM_001365398.1; NM_001350130.2; NM_001122764.3	c.798A>C; c.1095A>C; c.720A>C; c.1206A>C; c.330A>C; c.1107A>C	p.G369G; p.G402G; p.G266G; p.G365G; p.G110G; p.G240G	synonymous	Likely Benign				10.73	112762537	0.043	RCV000967920.1
1	161163075	161163075	q23.3	C	T	SNV	Exonic	ADAMTS4	NM_001320336.3; ENST00000367996.6; NM_005099.6	c.1839G>A	p.V613V	synonymous	Uncertain Significance				10.34	1023316253	0.001
1	161163466	161163466	q23.3	G	A	SNV	Exonic	ADAMTS4	NM_001320336.3; ENST00000367996.6; NM_005099.6	c.1699C>T	p.R567C	missense	Uncertain Significance	Damaging	0	Probably Damaging	31	147127522	0.195
1	161185124	161185124	q23.3	G	A	SNV	Exonic	FCER1G	ENST00000289902.2; NM_004106.2	c.13G>A	p.V5M	missense	Uncertain Significance	Damaging	0.02	Benign	15.4	144682477	0.073
1	161199656	161199656	q23.3	G	A	SNV	Exonic; 3'UTR; Intronic	NR1I3; TOMM40L	NM_001286373.2; NM_001077473.3; ENST00000504010.5; ENST00000515621.5; ENST00000367988.8; NM_001077472.3; NM_001077480.3; ENST00000545897.5; ENST00000367987.1; ENST00000512372.5; ENST00000511676.5; ENST00000508387.5; ENST00000367985.7; NM_001077471.3; NM_001077479.3; NM_001286374.2; ENST00000437437.6; ENST00000367979.6; NM_001077470.3; ENST00000428574.6; NM_001077477.3; ENST00000367983.9; ENST0000…	c.933-94C>T; c.990C>T; c.891C>T; c.*107C>T; c.1005C>T; c.906C>T; c.831-94C>T; c.*771G>A; c.801-94C>T; c.714-94C>T; c.774C>T; c.753C>T; c.861C>T; c.*47-94C>T; c.876C>T; c.846-94C>T; c.930-94C>T; c.978C>T; c.858-94C>T	p.Y258Y; p.Y302Y; p.Y335Y; p.Y326Y; p.Y251Y; p.Y330Y; p.Y297Y; p.Y287Y; p.Y292Y	synonymous	Likely Benign				< 10	79799851	0.045	RCV000359619.1
1	161203078	161203078	q23.3	G	A	SNV	Exonic; Intronic	NR1I3	NM_001077473.3; ENST00000504010.5; NM_001077472.3; NM_001077480.3; ENST00000515621.5; ENST00000512372.5; ENST00000511676.5; ENST00000508387.5; ENST00000367985.7; NM_001077471.3; NM_001077479.3; ENST00000437437.6; ENST00000367979.6; ENST00000428574.6; NM_001077470.3; NM_001077477.3; ENST00000367983.9; ENST00000505005.5; ENST00000506209.5; ENST00000367984.8; NM_005122.5; NM_001077478.3; ENST0000051…	c.289C>T; c.64C>T; c.202C>T; c.239-1814C>T; c.152-1814C>T	p.R68W; p.R22W; p.R97W	missense	Uncertain Significance	Damaging	0	Possibly Damaging	26.1	34161743	0.058	RCV000320038.1
1	161253521	161253521	q23.3	G	T	SNV	Intronic	PCP4L1	ENST00000504449.2; NM_001102566.2	c.64+9G>T			Likely Benign				11.16	115155453	0.183	RCV000968532.1
1	161480718	161480718	q23.3	G	A	SNV	Exonic; Intronic	FCGR2A	NM_001375297.1; ENST00000271450.12; ENST00000367972.8; NM_001375296.1; NM_001136219.3; NM_021642.5	c.711G>A; c.714G>A; c.616+854G>A; c.619+854G>A	p.L238L; p.L237L	synonymous	Likely Benign				< 10	140474146	0.228
1	161495376	161495376	q23.3	G	C	SNV	Exonic	HSPA6	NM_002155.5; ENST00000309758.6	c.928G>C	p.D310H	missense	Uncertain Significance	Damaging	0.01	Probably Damaging	25.9	529246286	0.004						1738574	3.03
1	161495735	161495735	q23.3	T	G	SNV	Exonic	HSPA6	NM_002155.5; ENST00000309758.6	c.1287T>G	p.T429T	synonymous	Likely Benign				< 10	41297720	0.244
1	161693340	161693340	q23.3	C	T	SNV	Exonic	FCRLB	ENST00000367944.3; NM_001288829.1; NM_001288832.1; ENST00000367948.6; ENST00000367946.7; NM_001320241.1; NM_001288831.1; ENST00000367945.5; NM_001002901.3; ENST00000336830.9; NM_001288830.1	c.236C>T; c.215C>T	p.T72I; p.T79I	missense	Uncertain Significance	Tolerated	0.06	Possibly Damaging	25.3	150995653	0.174
1	161967881	161967881	q23.3	T	A	SNV	Exonic	OLFML2B	NM_001297713.2; ENST00000294794.8; NM_015441.3; NM_001347700.2; ENST00000367940.2	c.1211A>T; c.1214A>T; c.1208A>T	p.D403V; p.D404V; p.D405V	missense	Uncertain Significance	Tolerated	0.54	Benign	< 10	146002791	0.094
1	161967990	161967990	q23.3	G	A	SNV	Exonic	OLFML2B	NM_001297713.2; ENST00000294794.8; NM_015441.3; NM_001347700.2; ENST00000367940.2	c.1105C>T; c.1099C>T; c.1102C>T	p.R369W; p.R368W; p.R367W	missense	Uncertain Significance	Damaging	0.03	Benign	16.96	77628593	0.174
1	161987190	161987190	q23.3	C	G	SNV	Exonic	OLFML2B	NM_001297713.2; ENST00000294794.8; NM_015441.3; NM_001347700.2; ENST00000367940.2	c.546G>C	p.E182D	missense	Uncertain Significance	Tolerated	0.14	Possibly Damaging	33	115206896	0.026
1	162345160	162345160	q23.3	G	C	SNV	Exonic	SPATA46	ENST00000367935.10; NM_182581.4	c.137C>G	p.S46C	missense	Uncertain Significance	Damaging	0.03	Possibly Damaging	23.4	144712469	0.069
1	162467081	162467081	q23.3	G	C	SNV	Promoter; Exonic	UHMK1	NM_175866.5; ENST00000489294.2; NM_144624.2; NM_001184763.1; ENST00000545294.5; ENST00000538489.5	c.-710G>C; c.41G>C	p.R14P	missense	Uncertain Significance				< 10	897495852	0.007
1	162469914	162469914	q23.3	T	C	SNV	Exonic	UHMK1	NM_175866.5; NM_144624.2; ENST00000489294.2; NM_001184763.1; ENST00000545294.5; ENST00000538489.5	c.438T>C; c.216T>C	p.L146L; p.L72L	synonymous	Uncertain Significance				12.13	149580384	0.088
1	162549332	162549332	q23.3	C	T	SNV	Exonic	UAP1	NM_001324116.4; ENST00000367926.8; NM_001324117.3; NM_001388401.1; NM_001324114.2; NM_001388402.1; NM_001324115.3; NM_003115.6; NM_001324113.2	c.600C>T	p.P200P	synonymous	Uncertain Significance				< 10	773224160	0.002						1319798	0.23
1	162562566	162562566	q23.3	A	G	SNV	Exonic; Intronic	UAP1	NM_001324116.4; ENST00000367926.8; NM_001324117.3; NM_001388401.1; NM_001324114.2; NM_001388402.1; NM_001324115.3; NM_003115.6; NM_001324113.2	c.1400A>G; c.1358+2265A>G; c.1403A>G	p.N468S; p.N467S	missense	Uncertain Significance	Tolerated	1		22.1	113556635	0.299
1	162729728	162729728	q23.3	A	G	SNV	Exonic	DDR2	ENST00000367921.8; NM_001354983.2; NM_001014796.3; NM_006182.4; ENST00000367922.7; NM_001354982.2	c.814A>G	p.M272V	missense	Uncertain Significance	Activating	1	Benign	14.9	373748687	0.002
1	162825477	162825477	q23.3	C	T	SNV	Exonic	CCDC190	NM_178550.5; ENST00000367910.5	c.259G>A	p.V87M	missense	Uncertain Significance	Tolerated	0.28	Benign	< 10	1311407331	0.002						9015857	0.19
1	162825490	162825490	q23.3	T	C	SNV	Exonic	CCDC190	NM_178550.5; ENST00000367910.5	c.246A>G	p.P82P	synonymous	Likely Benign				< 10	139941480	0.117
1	165324743	165324743	q23.3	C	T	SNV	Exonic	LMX1A	ENST00000294816.6; NM_001174069.2; ENST00000342310.7; NM_177398.4; ENST00000367893.4	c.54G>A	p.S18S	synonymous	Uncertain Significance				< 10								2088867	4.65
1	165389168	165389168	q23.3	T	C	SNV	Exonic	RXRG	NM_006917.5; NM_001256570.2; ENST00000619224.1; NM_001256571.2; ENST00000359842.10	c.12A>G; c.381A>G	p.P127P; p.P4P	synonymous	Uncertain Significance				< 10	199781666	0.007
1	165738054	165738054	q24.1	A	G	SNV	Promoter; Exonic; ncRNA; 5'UTR; Intronic	TMCO1-AS1; TMCO1	NR_045818.1; ENST00000464650.5; NM_019026.6; ENST00000367881.11; NM_001256164.1; ENST00000612311.4; ENST00000580248.5; NR_125374.1; NM_001256165.1	c.-241T>C; c.-66T>C; n.-112A>G; n.106T>C; c.88T>C; c.-182-548T>C; c.-302T>C	p.F30L	missense	Likely Benign				11.49	62622803	0.112	RCV000913229.2
1	166818686	166818686	q24.1	C	T	SNV	Exonic	POGK	NM_001314014.2; NM_017542.5; ENST00000367876.9	c.516C>T; c.870C>T	p.L172L; p.L290L	synonymous	Likely Benign				< 10	61745126	0.339	RCV000965572.1
1	166819585	166819585	q24.1	T	C	SNV	Exonic	POGK	NM_001314014.2; NM_017542.5; ENST00000367876.9	c.1769T>C; c.1415T>C	p.L590S; p.L472S	missense	Uncertain Significance			Benign	19.04	142458414	0.09
1	167032901	167032901	q24.1	T	C	SNV	Exonic	GPA33	NM_005814.3; ENST00000367868.4	c.489A>G	p.Q163Q	synonymous	Uncertain Significance				< 10	140361439	0.014
1	167095635	167095635	q24.1	G	T	SNV	Exonic	STYXL2	ENST00000271385.9; NM_001080426.3	c.1267G>T	p.A423S	missense	Uncertain Significance	Tolerated	0.19	Benign	< 10	145405415	0.057
1	167096024	167096024	q24.1	C	A	SNV	Exonic	STYXL2	ENST00000271385.9; NM_001080426.3	c.1656C>A	p.I552I	synonymous	Uncertain Significance				< 10	149834209	0.073
1	167096168	167096168	q24.1	G	A	SNV	Exonic	STYXL2	ENST00000271385.9; NM_001080426.3	c.1800G>A	p.V600V	synonymous	Uncertain Significance				< 10	149689505	0.024
1	167097117	167097117	q24.1	G	A	SNV	Exonic	STYXL2	ENST00000271385.9; NM_001080426.3	c.2749G>A	p.V917I	missense	Uncertain Significance	Tolerated	0.24	Benign	< 10	149150780	0.06
1	167097230	167097230	q24.1	G	A	SNV	Exonic	STYXL2	ENST00000271385.9; NM_001080426.3	c.2862G>A	p.W954*	stop gain	Uncertain Significance				40	148470442	0.018
1	167097543	167097543	q24.1	C	T	SNV	Exonic	STYXL2	ENST00000271385.9; NM_001080426.3	c.3175C>T	p.R1059C	missense	Uncertain Significance	Damaging	0.04	Benign	21.1	147410196	0.078
1	167341211	167341211	q24.2	C	T	SNV	Exonic; ncRNA	POU2F1	ENST00000367866.7; ENST00000367862.9; ENST00000541643.7; NM_001198783.2; NM_001365849.1; ENST00000429375.6; NR_037163.2; NM_001365848.1; NM_002697.4; NM_001198786.2	c.307C>T; c.265C>T; c.340C>T; n.453C>T; c.271C>T	p.P91S; p.P114S; p.P103S; p.P89S	missense	Uncertain Significance	Tolerated	0.73	Probably Damaging	26.1	77105959	0.116
1	167409915	167409915	q24.2	A	G	SNV	Exonic	CD247	NM_000734.4; NM_001378516.1; NM_198053.3; ENST00000392122.3; NM_001378515.1; ENST00000362089.10	c.148T>C; c.241T>C	p.F81L; p.F50L	missense	Uncertain Significance	Tolerated	0.1	Benign	24.8	147458563	0.004	RCV001302316.1
1	167653206	167653206	q24.2	C	A	SNV	Exonic	RCSD1	ENST00000367854.8; NM_001322924.2; NM_052862.4; NM_001322923.2; ENST00000537350.5	c.76C>A	p.R26R	synonymous	Uncertain Significance				10.11	143865913	0.01
1	167666892	167666892	q24.2	C	T	SNV	Exonic	RCSD1	ENST00000367854.8; NM_001322924.2; NM_052862.4; NM_001322923.2; ENST00000537350.5	c.1031C>T; c.941C>T; c.869C>T	p.A344V; p.A290V; p.A314V	missense	Uncertain Significance	Tolerated	0.35	Benign	< 10	147353919	0.061
1	167780103	167780103	q24.2	G	C	SNV	Exonic	ADCY10	NM_018417.6; ENST00000367851.9; NM_001297772.2; ENST00000367848.1; NM_001167749.3; ENST00000545172.5	c.4254C>G; c.4530C>G; c.4071C>G	p.C1418W; p.C1510W; p.C1357W	missense	Uncertain Significance			Benign	23	114703390	0.017
1	167787403	167787403	q24.2	T	A	SNV	Exonic	ADCY10	NM_018417.6; ENST00000367851.9; NM_001297772.2; ENST00000367848.1; NM_001167749.3; ENST00000545172.5	c.4389A>T; c.4113A>T; c.3930A>T	p.I1463I; p.I1310I; p.I1371I	synonymous	Likely Benign				< 10	61745242	0.252	RCV000972657.3
1	167791289	167791289	q24.2	A	G	SNV	Exonic	ADCY10	NM_018417.6; ENST00000367851.9; NM_001297772.2; ENST00000367848.1; NM_001167749.3; ENST00000545172.5	c.3983T>C; c.3800T>C; c.4259T>C	p.L1420P; p.L1267P; p.L1328P	missense	Uncertain Significance			Probably Damaging	28.1	1159468013
1	167791328	167791328	q24.2	T	C	SNV	Exonic	ADCY10	NM_018417.6; ENST00000367851.9; NM_001297772.2; ENST00000367848.1; NM_001167749.3; ENST00000545172.5	c.4220A>G; c.3944A>G; c.3761A>G	p.E1315G; p.E1254G; p.E1407G	missense	Uncertain Significance			Possibly Damaging	24.7	61737676	0.052
1	167792339	167792339	q24.2	G	A	SNV	Exonic	ADCY10	NM_018417.6; ENST00000367851.9; NM_001297772.2; ENST00000367848.1; NM_001167749.3; ENST00000545172.5	c.3799C>T; c.3616C>T; c.4075C>T	p.L1267L; p.L1206L; p.L1359L	synonymous	Likely Benign				< 10	73039538	0.173	RCV000883026.3
1	167871012	167871012	q24.2	C	T	SNV	Exonic; Intronic	ADCY10	NM_018417.6; ENST00000367851.9; NM_001297772.2; ENST00000367848.1; NM_001167749.3; ENST00000545172.5	c.-24+242G>A; c.324G>A; c.48G>A	p.E16E; p.E108E	synonymous	Uncertain Significance				< 10	145109141	0.014	RCV001475546.1
1	167906180	167906180	q24.2	T	C	SNV	Exonic; Intronic; ncRNA; Promoter; 5'UTR	DCAF6; MPC2	ENST00000367840.3; NR_026550.3; NM_001017977.3; ENST00000432587.6; NM_001349778.2; NR_146228.1; NM_001198957.2; NM_001349780.2; NM_001349774.2; NM_001198956.2; NM_015415.3; NR_146230.2; NM_001349779.1; NM_001349777.2; ENST00000271373.9; ENST00000312263.10; NM_001349773.2; NM_001349775.1; NR_146229.2; ENST00000367846.8; NM_001143674.4; NM_018442.4; NM_001349776.2	c.-61A>G; c.-349T>C; n.-946A>G; n.260T>C; c.-58+63A>G; c.-345+121T>C; c.-345+250T>C; c.-1101A>G; c.31T>C; c.-345+433T>C; n.134+250T>C	p.L11L	synonymous	Uncertain Significance				14.17	143132333	0.015
[truncated: 22,087 more rows]

## Sheet: Hispanic
Table SIV. Details of genetic variants.
[truncated: 7,879 more rows]
